# Supplementary material for: Stereoselective conjugate cyanation of enals by combining photoredox and organocatalysis
Source: Springer Nature journal article supplement (doi:10.1038/s41929-023-00939-y), 2023-04-06
Supplement: MOESM1 [file 41929_2023_939_MOESM1_ESM.pdf]

---

# Stereoselective conjugate cyanation of enals by combining photoredox and organocatalysis

---

In the format provided by the authors and unedited

---

# Table of Contents

## Supplementary Methods

|                                                                                   |     |
|-----------------------------------------------------------------------------------|-----|
| General Information.....                                                          | 2   |
| Optimisation Studies for the Cross-Electrophile Coupling.....                     | 3   |
| Preparation of Enals <b>1</b> .....                                               | 4   |
| Synthesis of Acrylates <b>5</b> .....                                             | 11  |
| Preparation of Dihydropyridine <b>R-1</b> .....                                   | 13  |
| General Procedure for the Conjugate Cyanation of Enals.....                       | 14  |
| Characterization Data for the Conjugate Cyanation of Enals.....                   | 17  |
| Further Derivatization of Cyanoaldehyde <b>2a</b> .....                           | 37  |
| Characterization of the $\beta$ -Sulfone Aldehyde <b>2a'</b> (byproduct).....     | 40  |
| General Procedure for the Cross-Electrophile Coupling of Enals and Acrylates..... | 42  |
| Characterization Data of the Cross Electrophile Coupling Products <b>6</b> .....  | 44  |
| Derivatization of 1,6-Dicarbonyl Products.....                                    | 82  |
| Organocatalytic Asymmetric Conjugate Allylation of Enals.....                     | 83  |
| NMR spectra.....                                                                  | 84  |
| Radical Clock Experiment.....                                                     | 145 |
| Cyclic Voltammetric Studies.....                                                  | 146 |
| UV-Vis Spectroscopic Studies.....                                                 | 147 |
| Stern-Volmer Quenching Studies.....                                               | 148 |
| Proposed Catalytic Cycle for the Cross Electrophile Coupling.....                 | 153 |
| Quantum Yield Determination.....                                                  | 153 |
| X-Ray Crystallography.....                                                        | 157 |
| <b>Supplementary Table</b> .....                                                  | 3   |
| <b>Supplementary References</b> .....                                             | 172 |

## Supplementary Methods

### General Information

The NMR spectra were recorded at 300 MHz, 400 MHz and 500 MHz Bruker spectrometers for  $^1\text{H}$  or at 75 MHz, 101 MHz and 126 MHz for  $^{13}\text{C}$  or 376 MHz and 471 MHz for  $^{19}\text{F}$ , respectively. The chemical shifts ( $\delta$ ) for  $^1\text{H}$  and  $^{13}\text{C}$  signals are given in ppm relative to residual signals of the solvents ( $\text{CHCl}_3$  at 7.26 ppm in  $^1\text{H}$  NMR and at 77.16 ppm in  $^{13}\text{C}$  NMR spectra). Coupling constants are given in Hz. The following abbreviations are used to indicate the multiplicity: s (singlet), d (doublet), t (triplet), q (quartet), p (pentet), hept (heptet), m (multiplet), br (broad).

High-resolution mass spectra (HRMS) were obtained from the ICIQ High-Resolution Mass Spectrometry Unit on MicroTOF Focus and Maxis Impact (Bruker Daltonics) with electrospray ionization (EI) or atmospheric pressure chemical ionization (APCI). X-ray data were obtained from the ICIQ X-Ray Unit using a Bruker-Nonius diffractometer equipped with an APPEX 2 4K CCD area detector. Optical rotations were measured on a Polarimeter Jasco P-1030 and are reported as follows:  $[\alpha]_{\text{D}}$  ambient temperature (c in g per 100 mL, solvent). Cyclic voltammetry studies were carried out on a Princeton Applied Research PARSTAT 2273 potentiostat, offering compliance voltage up to  $\pm 100$  V (available at the counter electrode),  $\pm 10$  V scan range and  $\pm 2$  A current range. UV-Vis measurements were carried out on a Agilent Cary 60 spectrophotometer equipped with silicon diode detector, double beam optics and 80 Hz Xenon Flash Lamp as light source. Ozonolysis was carried out using a CMG 5-5 Ozone Generator and the OMG 200-2 Ozone Analyzer. Hydrogenation was carried out using a H-Cube Pro system using disposable CatCarts cartridges (30 mm, 10% Pd/C).

The authors are indebted to the team of the Research Support Area at ICIQ, particularly to the X-ray, the NMR, and the High-Resolution Mass Spectrometry Units.

**General Procedures.** All reactions were set up under an argon atmosphere in dry glassware using standard Schlenk techniques, unless otherwise stated. Synthesis grade solvents were used as purchased. Anhydrous solvents were taken from a commercial SPS solvent dispenser. Chromatographic purification of products was accomplished using flash column chromatography (FC) on silica gel (Merck, 230-400 mesh). For thin layer chromatography (TLC) analysis throughout this work, Merck precoated TLC plates (silica gel 60 GF<sub>254</sub>, 0.25 mm) were used, using UV light as the visualizing agent and common laboratory stains (potassium permanganate ( $\text{KMnO}_4$ ), vanillin, phosphomolybdic acid (PMA), bromocresol) as developing agents. For preparative thin layer chromatography (prepTLC) purification throughout this work, Uniplate precoated TLC plates (silica gel GF<sub>254</sub>, 1000 micron) were used, using UV light as the visualizing agent. Organic solvents were removed under reduced pressure on a Büchi rotary evaporator.

**Determination of Enantiomeric Purity:** UPC<sup>2</sup> analysis on chiral stationary phase was performed on a Waters ACQUITY<sup>®</sup> instrument using IA-3, IB-3, ID-3, IE-3, IG-3 and OJ-3 chiral columns. HPLC analysis on chiral stationary phase was performed on an Agilent 1200 series HPLC, using Daicel Chiralpak IC-3 column with n-hexane:iPrOH as the eluent. The exact conditions for the analyses are specified in the experimental section of the individual compounds. UPC<sup>2</sup> traces were compared to racemic samples prepared by running the reaction either in the presence of a catalytic amount (20 mol%) of racemic catalyst **A-3** (for the conjugate cyanation) or racemic catalyst **A-1** (for the cross electrophile coupling), the latter being commercially available from Sigma Aldrich.

**Materials:** Commercial grade reagents and solvents were purchased at the highest commercial quality from Sigma Aldrich, Fluka, Acros Organics, Fluorochem or Alfa Aesar and used as received unless otherwise stated. The photocatalyst 4-CzIPN is commercially available and was used as obtained. The chiral secondary amine catalysts **A-1** and **A-2** are commercially available, while amine catalysts **A-3** and **A-4** were prepared according to reported procedures.<sup>1</sup> Some of the enal substrates **1**, including octenal **1a**, crotonaldehyde, and enal **1k** are commercially available and were distilled prior to use. Other

enals or acrylates were prepared according to literature procedures or as detailed in the Supplementary Methods.

## Optimisation Studies for the Cross-Electrophile Coupling

Supplementary Table 1. Optimisation studies.<sup>a</sup>

C5H11-CH=CH-CHO (1a, 3 equiv.) + Ph-CH=CH-CO2Bn (5c)  $\xrightarrow[\text{reductant R (1.5 equiv.), H}_2\text{O (10 eq.), DME, -10 }^\circ\text{C, LED 460 nm}]{\text{amine catalyst A (20 mol%), TFA (30 mol%), 4-CzIPN (1 mol%)}}$  C5H11-CH2-CH2-CH(Ph)-CO2Bn (6q)

**aminocatalysts**

**reductants**

**A-2:** R<sup>1</sup> = H, R<sup>2</sup> = CF<sub>3</sub>  
**A-3:** R<sup>1</sup> = F, R<sup>2</sup> = CF<sub>3</sub>  
**A-4:** R<sup>1</sup> = F, R<sup>2</sup> = CF(CF<sub>3</sub>)<sub>2</sub>  
**R-1** (R = CO<sub>2</sub>Et)  
**R-2** (R = H)

| entry | amine A | reductant | notes                      | 6q yield (%) | d.r.  | e.r. <sup>1</sup> , e.r. <sup>2</sup> |
|-------|---------|-----------|----------------------------|--------------|-------|---------------------------------------|
| 1     | A-1     | R-1       | -                          | 90           | 1.2:1 | 77.5:22.5, 60:40                      |
| 2     | A-2     | R-1       | -                          | 29           | 2:1   | 78:22, 64:36                          |
| 3     | A-3     | R-1       | -                          | 88           | 1.1:1 | 94:6, 88:12                           |
| 4     | A-4     | R-1       | -                          | 90           | 1:1   | 94:6, 88:12                           |
| 5     | A-3     | R-1       | DME/H <sub>2</sub> O (4:1) | 19           | 1.1:1 | 94:6, 82.5:17.5                       |
| 6     | A-3     | R-1       | 3 eq. H <sub>2</sub> O     | 21           | 1:1   | -                                     |
| 7     | A-3     | R-1       | no PC or light             | 0            | -     | -                                     |
| 8     | -       | R-1       | no amine                   | <15          | 1.5:1 | -                                     |
| 9     | A-3     | R-2       | -                          | 0            | -     | -                                     |

<sup>a</sup> Reactions performed on a 0.1 mmol scale under illumination by a blue LED; yields determined by <sup>1</sup>H NMR analysis using trichloroethylene as the internal standard.

## Preparation of Enals 1

**(E)-5-methylhex-2-enal (1c):** prepared according to a procedure reported in the literature.<sup>2</sup>

<sup>1</sup>H NMR (400 MHz, CDCl<sub>3</sub>) δ = 9.52 (d, *J* = 7.9 Hz, 1H), 6.83 (dt, *J* = 15.5, 7.4 Hz, 1H), 6.12 (ddt, *J* = 15.6, 7.9, 1.4 Hz, 1H), 2.23 (td, *J* = 7.1, 1.4 Hz, 2H), 1.83 (hept, *J* = 6.6 Hz, 1H), 0.96 (d, *J* = 6.7 Hz, 6H).

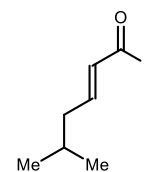

Chemical Formula: C<sub>7</sub>H<sub>12</sub>O  
Molecular Weight: 112,1720

**(E)-5-Phenylpent-2-enal (1e):** prepared according to a procedure reported in the literature.<sup>3</sup> Spectral data are in agreement with the literature.

<sup>1</sup>H NMR (500 MHz, CDCl<sub>3</sub>) δ = 9.50 (dd, *J* = 7.9, 0.8 Hz, 1H), 7.33 – 7.29 (m, 2H), 7.25 – 7.16 (m, 3H), 6.86 (dt, *J* = 15.7, 6.7 Hz, 1H), 6.14 (ddt, *J* = 15.6, 7.9, 1.5 Hz, 1H), 2.84 (t, *J* = 7.6 Hz, 2H), 2.70 – 2.65 (m, 2H).

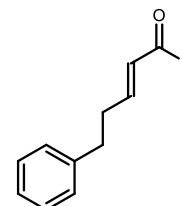

Chemical Formula: C<sub>11</sub>H<sub>12</sub>O  
Molecular Weight: 160,2160

**3-(3-Methoxyphenyl)propanal.** 3-(3-methoxyphenyl)propan-1-ol (1.66 g, 10.0 mmol, 1.0 equiv.) was dissolved in DCM (50 mL). The mixture was cooled to 0 °C and Dess-Martin periodinane (5.09 g, 12.0 mmol, 1.2 equiv.) was added in portions over 10 minutes. The mixture was stirred for 16 h and quenched carefully with a mixture of aqueous NaHCO<sub>3</sub> (saturated, 100 mL) and aqueous Na<sub>2</sub>S<sub>2</sub>O<sub>3</sub> (10%, 100 mL) and stirred vigorously for 1 hour. The layers were separated and the aqueous layer was extracted with DCM (2 x 100 mL). The combined organic layers were dried with MgSO<sub>4</sub>, concentrated and purified by column chromatography (silica gel, 10% EtOAc in hexanes) to afford 1.56 g (95%) of aldehyde. Analytical data is in agreement with the literature.<sup>4</sup>

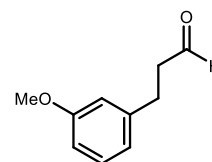

Chemical Formula: C<sub>10</sub>H<sub>12</sub>O<sub>2</sub>  
Molecular Weight: 164,2040

<sup>1</sup>H NMR (500 MHz, CDCl<sub>3</sub>): δ = 9.82 (t, *J* = 1.4 Hz, 1H), 7.21 (td, *J* = 7.7, 0.8 Hz, 1H), 6.80 – 6.73 (m, 3H), 3.80 (s, 3H), 2.94 (t, *J* = 7.6 Hz, 2H), 2.78 (t, *J* = 7.7 Hz, 2H) ppm.

**(E)-5-(3-Methoxyphenyl)pent-2-enal (1f).** 3-(3-methoxyphenyl)propanal (1.56 g, 9.53 mmol, 1.0 equiv.) was dissolved in THF (anhydrous, 19 mL) under an argon atmosphere. (Triphenylphosphoranylidene)-acetaldehyde (3.48 g, 11.4 mmol, 1.2 equiv.) was added and the mixture was refluxed for 1 day. Upon concentration, the product was purified by column chromatography (silica gel, 5-10% EtOAc in hexanes). Clean fractions were combined to afford 751 mg (41%) of **1f** as yellow oil.

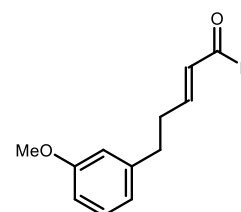

Chemical Formula: C<sub>12</sub>H<sub>14</sub>O<sub>2</sub>  
Molecular Weight: 190,2420

<sup>1</sup>H NMR (400 MHz, CDCl<sub>3</sub>): δ = 9.50 (d, *J* = 7.8 Hz, 1H), 7.23 (dd, *J* = 8.2, 7.5 Hz, 1H), 6.85 (dt, *J* = 15.6, 6.7 Hz, 1H), 6.80 – 6.73 (m, 3H), 6.14 (ddt, *J* = 15.7, 7.9, 1.5 Hz, 1H), 3.80 (s, 3H), 2.81 (t, *J* = 7.6 Hz, 2H), 2.71 – 2.63 (m, 2H) ppm. <sup>13</sup>C NMR (101 MHz, CDCl<sub>3</sub>): δ = 194.1, 159.9, 157.4, 142.0, 133.6, 129.7, 120.8, 114.4, 111.6, 55.3, 34.2 (2C) ppm.

**HRMS (ESI):** m/z calculated for [C<sub>12</sub>H<sub>14</sub>NaO<sub>2</sub>]<sup>+</sup> [M+Na]<sup>+</sup>: 213.0886; found: 213.0889.

**3-(3-(Trifluoromethyl)phenyl)propanal.** 3-(3-(trifluoromethyl)phenyl)propan-1-ol (2.04 g, 10.0 mmol, 1.0 equiv.) was dissolved in DCM (50 mL). The mixture was cooled to 0 °C and Dess-Martin periodinane (5.09 g, 12.0 mmol, 1.2 equiv.) was added in portions over 10 minutes. The mixture was stirred for 16 h and quenched carefully with a mixture of aqueous NaHCO<sub>3</sub> (saturated, 100 mL) and aqueous Na<sub>2</sub>S<sub>2</sub>O<sub>3</sub> (10%, 100 mL) and stirred vigorously for 1 hour. The layers were separated and the aqueous layer was extracted with DCM (2 x 100 mL). The combined organic layers were dried with MgSO<sub>4</sub>, concentrated and purified by column chromatography (silica gel, 10% EtOAc in hexanes) to afford 1.47 g (73%) of aldehyde. Analytical data is in agreement with the literature.<sup>5</sup>

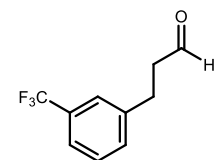

Chemical Formula: C<sub>10</sub>H<sub>9</sub>F<sub>3</sub>O  
Molecular Weight: 202,1762

<sup>1</sup>H NMR (500 MHz, CDCl<sub>3</sub>): δ = 9.83 (t, *J* = 1.2 Hz, 1H), 7.50 – 7.36 (m, 4H), 3.02 (t, *J* = 7.5 Hz, 2H), 2.83 (td, *J* = 7.5, 0.9 Hz, 2H) ppm.

**(*E*)-5-(3-(trifluoromethyl)phenyl)pent-2-enal (1g).**

3-(3-(trifluoromethyl)phenyl)propanal (1.47 g, 7.28 mmol, 1.0 equiv.) was dissolved in THF (anhydrous, 15 mL) under an Argon atmosphere. (Triphenylphosphoranylidene)-acetaldehyde (2.22 g, 7.28 mmol, 1.0 equiv.) was added and the mixture was refluxed for 1 day. Upon concentration, the product was purified by column chromatography (silica gel, 5-10% EtOAc in hexanes). Clean fractions were combined to afford 545 mg (33%) of **1g** as yellow oil.

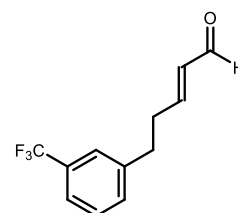

Chemical Formula: C<sub>12</sub>H<sub>11</sub>F<sub>3</sub>O  
Molecular Weight: 228,2142

<sup>1</sup>H NMR (400 MHz, CDCl<sub>3</sub>): δ = 9.51 (d, *J* = 7.8 Hz, 1H), 7.57 – 7.34 (m, 4H), 6.84 (dt, *J* = 15.7, 6.7 Hz, 1H), 6.14 (ddt, *J* = 15.7, 7.8, 1.5 Hz, 1H), 2.90 (d, *J* = 7.4 Hz, 2H), 2.74 – 2.64 (m, 2H) ppm. <sup>13</sup>C NMR (126 MHz, CDCl<sub>3</sub>): δ = 193.8, 156.3, 141.3, 133.8, 131.9, 131.1 (q, *J* = 32.0 Hz), 129.2, 125.2 (q, *J* = 3.9 Hz), 124.2 (q, *J* = 271.8 Hz), 123.5 (q, *J* = 3.8 Hz), 34.1, 34.0 ppm. <sup>19</sup>F NMR (471 MHz, CDCl<sub>3</sub>): δ = -62.64 ppm.

HRMS (ESI): *m/z* calculated for [C<sub>12</sub>H<sub>11</sub>F<sub>3</sub>NaO]<sup>+</sup> [M+Na]<sup>+</sup>: 251.0654; found: 251.0653.

**3-(4-Bromophenyl)propanal.** 3-(4-bromophenyl)propan-1-ol (2.15 g, 10.0 mmol, 1.0 equiv.) was dissolved in DCM (50 mL). The mixture was cooled to 0 °C and Dess-Martin periodinane (5.09 g, 12.0 mmol, 1.2 equiv.) was added in portions over 10 minutes. The mixture was stirred for 16 h and quenched carefully with a mixture of aqueous NaHCO<sub>3</sub> (saturated, 100 mL) and aqueous Na<sub>2</sub>S<sub>2</sub>O<sub>3</sub> (10%, 100 mL) and stirred vigorously for 1 hour. The layers were separated and the aqueous layer was extracted with DCM (2 x 100 mL). The combined organic layers were dried with MgSO<sub>4</sub>, concentrated and purified by column chromatography (silica gel, 10% EtOAc in hexanes) to afford 1.40 g (66%) of aldehyde as bright-yellow solid. Analytical data is in agreement with the literature.<sup>6</sup>

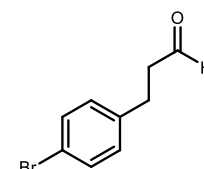

Chemical Formula: C<sub>9</sub>H<sub>9</sub>BrO  
Molecular Weight: 213,0740

<sup>1</sup>H NMR (500 MHz, CDCl<sub>3</sub>): δ = 9.81 (s, 1H), 7.41 (d, *J* = 8.3 Hz, 1H), 7.07 (d, *J* = 8.4 Hz, 2H), 2.91 (t, *J* = 7.4 Hz, 2H), 2.77 (td, *J* = 7.5, 1.1 Hz, 3H) ppm.

**(*E*)-5-(4-Bromophenyl)pent-2-enal (1h).** 3-(4-bromophenyl)propanal (1.40 g, 6.58 mmol, 1.0 equiv.) was dissolved in THF (anhydrous, 15 mL) under an Argon atmosphere. (Triphenylphosphoranylidene)-acetaldehyde (3.21 g, 10.5 mmol, 1.6 equiv.) was added and the mixture was refluxed for 1 day. Upon concentration, the product was purified by column chromatography (silica gel, 5-10% EtOAc in hexanes) to afford 970 mg (62%) of **1h**. Analytical data is in agreement with the literature.<sup>7</sup>

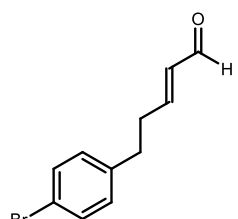

Chemical Formula: C<sub>11</sub>H<sub>11</sub>BrO  
Molecular Weight: 239,1120

<sup>1</sup>H NMR (500 MHz, CDCl<sub>3</sub>): δ = 9.49 (d, *J* = 7.8 Hz, 1H), 7.43 (d, *J* = 8.4 Hz, 2H), 7.06 (d, *J* = 8.6 Hz, 2H), 6.82 (dt, *J* = 15.7, 6.7 Hz, 1H), 6.13 (ddt, *J* = 15.7, 7.8, 1.5 Hz, 1H), 2.79 (t, *J* = 7.6 Hz, 2H), 2.68 – 2.60 (m, 2H) ppm.

**(E)-octa-2,7-dienal (1i).** (E)-octa-2,7-dienal was prepared according to a previous report<sup>8</sup> and analytical data is in agreement with the literature.

<sup>1</sup>H NMR (300 MHz, CDCl<sub>3</sub>): δ 9.51 (d, *J* = 7.9 Hz, 1H), 6.85 (dt, *J* = 15.6, 6.8 Hz, 1H), 6.12 (ddt, *J* = 15.6, 7.9, 1.5 Hz, 1H), 5.79 (ddt, *J* = 16.9, 10.2, 6.7 Hz, 1H), 5.09 – 4.96 (m, 2H), 2.35 (dtd, *J* = 8.1, 6.9, 1.5 Hz, 2H), 2.11 (dtt, *J* = 8.0, 6.8, 1.4 Hz, 2H), 1.62 (tt, *J* = 8.1, 6.9 Hz, 2H) ppm.

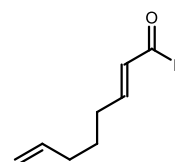

Chemical Formula: C<sub>8</sub>H<sub>12</sub>O  
Molecular Weight: 124,1830

**(S,E)-5,9-Dimethyldeca-2,8-dienal (1j).** (S)-3,7-dimethyloct-6-enal (1.00 g, 6.48 mmol, 1.0 equiv.) was dissolved in THF (anhydrous, 13.0 mL) under an Argon atmosphere. (Triphenylphosphoranylidene)-acetaldehyde (2.37 g, 7.78 mmol, 1.2 equiv.) was added and the mixture was refluxed for 2 days. Upon concentration, the product was filtered through a pad of silica gel (eluting with DCM). The filtrate was concentrated and purified by column chromatography (silica gel, 1% EtOAc in hexanes) to afford 300 mg (26%) of **1j** as colorless oil. Analytical data is in agreement with the literature.<sup>9</sup>

<sup>1</sup>H NMR (500 MHz, CDCl<sub>3</sub>): δ = 9.51 (d, *J* = 7.9 Hz, 1H), 6.83 (dt, *J* = 15.0, 7.3 Hz, 1H), 6.12 (ddd, *J* = 15.5, 7.9, 1.4 Hz, 1H), 2.39 – 2.32 (m, 1H), 2.22 – 2.15 (m, 1H), 2.06 – 1.94 (m, 2H), 1.74 – 1.66 (m, 1H), 1.69 (s, 3H), 1.60 (s, 3H), 1.43 – 1.32 (m, 1H), 1.29 – 1.17 (m, 2H), 0.94 (d, *J* = 6.7 Hz, 3H) ppm.

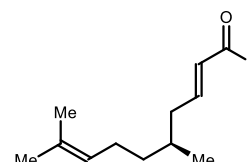

Chemical Formula: C<sub>12</sub>H<sub>20</sub>O  
Molecular Weight: 180,2910

**(E)-Oct-2-en-7-ynal (1l).** The product was synthesized by stirring hex-5-ynal (0.800 g, 8.32 mmol, 1.0 equiv.), which was synthesized from 5-hexyn-1-ol using reported procedure,<sup>10</sup> with (triphenylphosphoranylidene)-acetaldehyde (5.07 g, 2.0 equiv.) in dry CH<sub>2</sub>Cl<sub>2</sub>. The reaction was stirred at room temperature for 48 hours. The reaction mixture was carefully concentrated *in vacuo*, re-dissolved in 10% Et<sub>2</sub>O in n-pentane and filtered through a pad of celite. The crude product was then purified by flash column chromatography (silica gel, 5% Et<sub>2</sub>O in n-pentane) to afford **1l** as a colorless oil (562 mg, 55% yield). *Remarks: Product is highly volatile and would oxidise readily.*

<sup>1</sup>H NMR (400 MHz, CDCl<sub>3</sub>): δ = 9.51 (d, *J* = 7.8 Hz, 1H), 6.84 (dt, *J* = 15.6, 6.7 Hz, 1H), 6.15 (ddt, *J* = 15.6, 7.8, 1.5 Hz, 1H), 2.48 (dtd, *J* = 7.6, 6.8, 1.5 Hz, 2H), 2.26 (td, *J* = 6.9, 2.6 Hz, 2H), 1.99 (t, *J* = 2.6 Hz, 1H), 1.75 (p, *J* = 7.2 Hz, 2H) ppm. <sup>13</sup>C NMR (101 MHz, CDCl<sub>3</sub>): δ = 194.0, 157.3, 133.6, 83.3, 69.5, 31.6, 26.6, 18.0 ppm.

**HRMS (APCI):** *m/z* calculated for [C<sub>8</sub>H<sub>11</sub>O]<sup>+</sup> [M+H]<sup>+</sup>: 123.0804, found: 123.0799.

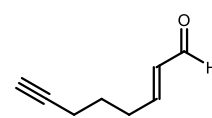

Chemical Formula: C<sub>8</sub>H<sub>10</sub>O  
Molecular Formula: 112.0732

**4-(1,3-Dioxoisindolin-2-yl)butanal.** The product was synthesized by stirring 2-(4-hydroxybutyl)isindoline-1,3 dione (2.51 g, 11.4 mmol, 1.00 equiv.), which was prepared according to previous report,<sup>11</sup> with pyridinium chlorochromate (PCC, 2.95 g, 1.20 equiv.) in dry CH<sub>2</sub>Cl<sub>2</sub> (15 mL) overnight. The crude product was filtered through a pad of celite, concentrated *in vacuo* and purified by flash column chromatography (silica, 25% EtOAc in n-hexanes) to afford the aldehyde as white solid (1.40 g, 56% yield).

<sup>1</sup>H NMR (300 MHz, CDCl<sub>3</sub>): δ = 9.67 (t, *J* = 1.2 Hz, 1H), 7.75 – 7.65 (m, 2H), 7.65 – 7.58 (m, 2H), 3.60 (t, *J* = 6.9 Hz, 2H), 2.46 (td, *J* = 7.2, 1.2 Hz, 2H), 1.89 (p, *J* = 7.0 Hz, 2H) ppm. The spectroscopic data is consistent with previous report.<sup>12</sup>

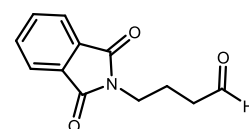

Chemical Formula: C<sub>12</sub>H<sub>11</sub>NO<sub>3</sub>  
Molecular Formula: 217.0739

**(E)-6-(1,3-Dioxoisindolin-2-yl)hex-2-enal (3m).** The product was synthesized by stirring 4-(1,3-dioxoisindolin-2-yl)butanal (2.10 g, 9.67 mmol, 1.0 equiv.) with (triphenylphosphoranylidene)acetaldehyde (3.53 g, 1.2 equiv.) in dry THF (21.0 mL). The reaction was heated under reflux for 24 hours. The reaction mixture was concentrated *in vacuo* and purified by flash column chromatography (silica, 25% EtOAc in n-hexanes). The crude product was then recrystallized from CH<sub>2</sub>Cl<sub>2</sub>/n-hexanes to afford **3m** as white solid. (582 mg, 25% yield).

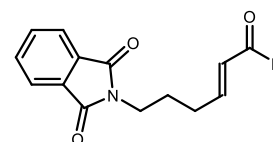

Chemical Formula: C<sub>14</sub>H<sub>13</sub>NO<sub>3</sub>  
Molecular Formula: 243.0895

<sup>1</sup>H NMR (500 MHz, CDCl<sub>3</sub>): δ = 9.38 (d, *J* = 7.8 Hz, 1H), 7.74 (dd, *J* = 5.5, 3.0 Hz, 2H), 7.64 (dd, *J* = 5.5, 3.1 Hz, 2H), 6.77 (dt, *J* = 15.6, 6.7 Hz, 1H), 6.05 (ddt, *J* = 15.7, 7.8, 1.6 Hz, 1H), 3.65 (t, *J* = 7.0 Hz, 2H), 2.38 – 2.29 (m, 2H), 1.84 (p, *J* = 7.4 Hz, 2H) ppm. <sup>13</sup>C NMR (126 MHz, CDCl<sub>3</sub>): δ = 193.9, 168.5, 156.7, 134.2, 133.6, 132.1, 123.5, 37.4, 30.1, 26.9 ppm.

HRMS (ESI): *m/z* calculated for [C<sub>14</sub>H<sub>13</sub>NO<sub>3</sub>Na]<sup>+</sup> [M+Na]<sup>+</sup>: 266.0788, found: 266.0788.

**4-(Benzyloxy)butanal.** Dess-martin periodinane (9.43 mmol, 4.00 g, 1.1 equiv.) was added portionwise to a mixture of 4-(benzyloxy)butan-1-ol (8.50 mmol, 1.5 mL, 1.0 equiv.) and water (8.93 mmol, 161 μL, 1.05 equiv.) in DCM (42 mL) previously cooled to 0 °C. The reaction mixture was allowed to warm to room temperature and further stirred for 2 h until completion of the reaction.

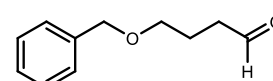

Chemical Formula: C<sub>11</sub>H<sub>14</sub>O<sub>2</sub>  
Exact Mass: 178.10

The reaction mixture was then cooled to 0 °C and carefully quenched by a 1:1 mixture of 10% aq. Na<sub>2</sub>S<sub>2</sub>O<sub>3</sub> and sat. aq. NaHCO<sub>3</sub> (75 mL) and let to stir until complete dissolution of the reaction mixture. The organic layer was further washed with a 1:1 mixture of 10% aq. Na<sub>2</sub>S<sub>2</sub>O<sub>3</sub> and sat. aq. NaHCO<sub>3</sub> (3x 50 mL) and dried over MgSO<sub>4</sub>. The volatiles were removed under reduced pressure and the crude was purified by flash column chromatography (silica gel, 5-10% EtOAc in hexanes) to obtain 4-(benzyloxy)butanal (1.35 g, 89%) as a colorless oil. Spectroscopic data are consistent with those previously reported.<sup>13</sup>

<sup>1</sup>H NMR (400 MHz, CDCl<sub>3</sub>): δ = 9.78 (t, *J* = 1.6 Hz, 1H), 7.40 – 7.24 (m, 5H), 4.49 (s, 2H), 3.51 (t, *J* = 6.1 Hz, 2H), 2.55 (td, *J* = 7.1, 1.6 Hz, 2H), 1.95 (tt, *J* = 7.1, 6.0 Hz, 2H) ppm.

**(E)-6-(Benzyloxy)hex-2-enal (1n).** Under an argon atmosphere a solution of (triphenylphosphoranylidene)acetaldehyde (9.09 mmol, 2.77 g, 1.2 equiv.) and 4-(benzyloxy)butanal (7.57 mmol, 1.35 g, 1.0 equiv.) in anhydrous THF (15 mL) was stirred under reflux for 16 h. The reaction mixture was allowed to cool to room temperature and concentrated under reduced pressure. The crude was purified by flash column chromatography (silica gel, 10-15% EtOAc in hexanes) to obtain **1n** (654 mg, 42%, *E/Z* = 9:1) as a colorless oil.

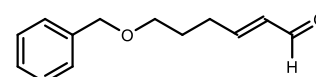

Chemical Formula: C<sub>13</sub>H<sub>16</sub>O<sub>2</sub>  
Exact Mass: 204.12

<sup>1</sup>H NMR (500 MHz, CDCl<sub>3</sub>, mixture of isomers): δ = 9.53 (d, *J* = 8.0 Hz, 1H, *Z*-isomer), 9.49 (d, *J* = 7.9 Hz, 1H, *E*-isomer), 7.37 – 7.29 (m, 5H), 7.10 – 7.02 (m, 1H, *Z*-isomer), 6.85 (dt, *J* = 15.7, 6.8 Hz, 1H, *E*-isomer), 6.31 – 6.25 (m, 1H, *Z*-isomer), 6.12 (ddt, *J* = 15.6, 7.9, 1.5 Hz, 1H, *E*-isomer), 4.50 (s, 2H), 3.51 (t, *J* = 6.1 Hz, 2H), 2.55 (td, *J* = 7.1, 1.6 Hz, 1H, *Z*-isomer), 2.49 – 2.42 (m, 2H, *E*-isomer), 1.98 – 1.93 (m, 1H, *Z*-isomer), 1.83 (tt, *J* = 7.4, 6.2 Hz, 2H, *E*-isomer) ppm. <sup>13</sup>C NMR (126 MHz, CDCl<sub>3</sub>, major isomer): δ = 194.2, 158.3, 138.4, 133.3, 128.6, 127.8, 127.8, 73.2, 69.2, 29.7, 28.2 ppm.

HRMS (ESI): *m/z* calculated for [C<sub>13</sub>H<sub>16</sub>O<sub>2</sub>Na]<sup>+</sup> [M+Na]<sup>+</sup>: 227.1043; found: 227.1038.

**(E)-7-Oxohept-5-enitrile (1o).** Under an atmosphere of argon, a solution of hex-5-enitrile (9.30 mmol, 1.0 mL, 1.0 equiv.), acrolein (45.0 mmol, 3.0 mL, 4.8 equiv.) and Hoveyda-Grubbs Catalyst 2nd Generation (186 μmol, 117 mg, 2 mol%) in anhydrous DCM (19 mL) was stirred under reflux for 16 h. The volatiles were removed under reduced pressure and the crude purified by flash column chromatography (silica

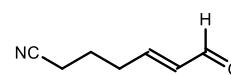

Chemical Formula: C<sub>7</sub>H<sub>9</sub>NO  
Molecular Weight: 123.16



gel, 50% EtOAc in hexanes) to obtain **1o** (340 mg, 30%) as colorless oil. Spectroscopic data are consistent with those previously reported.<sup>14</sup>

<sup>1</sup>H NMR (400 MHz, CDCl<sub>3</sub>): δ = 9.53 (d, *J* = 7.7 Hz, 1H), 6.80 (dt, *J* = 15.7, 6.7 Hz, 1H), 6.17 (ddt, *J* = 15.7, 7.7, 1.5 Hz, 1H), 2.57 – 2.48 (m, 2H), 2.46 – 2.36 (m, 2H), 1.95 – 1.86 (m, 2H).

**(E)-8-Morpholino-8-oxooct-2-enal (1p)**. A solution of 1-morpholinohept-6-en-1-one (7.00 mol, 1.38 g, 1.0 equiv. previously prepared following a reported procedure<sup>15</sup> in anhydrous DCM (28 mL) was cooled to -78 °C and degassed with a stream of oxygen. Ozone was then bubbled through the reaction mixture until it turned blue. The reaction was then purged with oxygen to remove excess of ozone and quenched with excess dimethyl sulfide. The reaction mixture was then let to warm to room temperature, the organic layer was washed with brine (3 x 30 mL) and dried over MgSO<sub>4</sub>. The volatiles were removed under reduced pressure to obtain crude 6-morpholino-6-oxohexanal (950 mg, 68%) which was engaged in the next step without further purification.

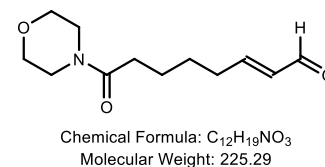

Under an atmosphere of argon, a solution of (triphenylphosphoranylidene)acetaldehyde (5.72 mmol, 1.74 g, 1.2 equiv.) and 6-Morpholino-6-oxohexanal (4.77 mmol, 950 mg, 1.0 equiv.) in anhydrous THF (10 mL) was stirred under reflux for 16 h. The reaction mixture was allowed to cool to room temperature and concentrated under reduced pressure. The crude was purified by flash column chromatography (silica gel, 2% MeOH in DCM) to obtain **1p** (219 mg, 20%) as a gum.

<sup>1</sup>H NMR (500 MHz, CDCl<sub>3</sub>): δ = 9.50 (d, *J* = 7.8 Hz, 1H), 6.85 (dt, *J* = 15.6, 6.7 Hz, 1H), 6.12 (ddt, *J* = 15.6, 7.9, 1.5 Hz, 1H), 3.69 – 3.65 (m, 4H), 3.65 – 3.59 (m, 2H), 3.49 – 3.42 (m, 2H), 2.41 – 2.35 (m, 2H), 2.34 (t, *J* = 7.3 Hz, 2H), 1.74 – 1.67 (m, 2H), 1.60 – 1.53 (m, 2H) ppm. <sup>13</sup>C NMR (126 MHz, CDCl<sub>3</sub>): δ = 194.1, 171.2, 158.2, 133.3, 67.1 (rotamer), 66.8 (rotamer), 46.1, 42.1, 32.7 (rotamer), 32.7 (rotamer), 27.8, 24.7 ppm.

HRMS (ESI): *m/z* calculated for [C<sub>12</sub>H<sub>19</sub>NO<sub>3</sub>Na]<sup>+</sup> [M+Na]<sup>+</sup>: 248.1257; found: 248.1261.

**(E)-12-Hydroxydodec-2-enal (1q)**. Under an atmosphere of argon, a solution of undec-10-en-1-ol (5.12 mmol, 1.0 mL, 1.0 equiv.), acrolein (15.4 mmol, 1.0 mL, 3.0 equiv.) and Hoveyda-Grubbs Catalyst 2nd Generation (51.2 μmol, 32.2 mg, 1 mol%) in anhydrous DCM (10 mL) was stirred under reflux for 16 h. The volatiles were removed under reduced pressure and the crude purified by flash column chromatography (silica gel, 5-10% Et<sub>2</sub>O in hexanes) to obtain **1q** (433 mg, 43%) as a colorless oil. Spectroscopic data are consistent with those previously reported.<sup>16</sup>

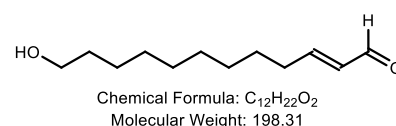

<sup>1</sup>H NMR (500 MHz, CDCl<sub>3</sub>): δ = 9.50 (d, *J* = 7.9 Hz, 1H), 6.85 (dt, *J* = 15.6, 6.8 Hz, 1H), 6.11 (ddt, *J* = 15.6, 7.9, 1.5 Hz, 1H), 3.64 (t, *J* = 6.6 Hz, 2H), 2.36 – 2.29 (m, 2H), 1.60 – 1.54 (m, 2H), 1.53 – 1.48 (m, 2H), 1.35 – 1.29 (m, 10H).

**(R,E)-6-((5R,8R,9S,10S,13R,14S,17R)-10,13-Dimethyl-3,12-dioxohexadecahydro-1H-cyclopenta[a]phenanthren-17-yl)hept-2-enal (1r)**.

(R)-4-((5R,8R,9S,10S,13R,14S,17R)-10,13-dimethyl-3,12-dioxohexadecahydro-1H-cyclopenta[a]phenanthren-17-yl)pentanal (600 mg, 1.61 mmol, 1.0 equiv., prepared according to a previous report<sup>17</sup>) was dissolved in THF (anhydrous, 10.0 mL) under an Argon atmosphere. (triphenylphosphoranylidene)-acetaldehyde (784 mg, 2.58 mmol, 1.6 equiv.) were added and the mixture was refluxed for 6 days. In order to achieve full conversion, another 0.4 equiv. of

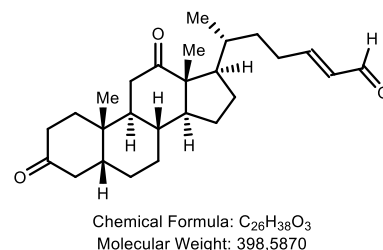

(triphenylphosphoranylidene)-acetaldehyde were added and the mixture was refluxed for 1 day. Upon concentration, the mixture was purified by column chromatography (silica gel, 15–20% EtOAc in hexanes). Fractions with minor impurities (< 20% by NMR) were combined, concentrated and purified again by column chromatography (silica gel, 1% MeOH in DCM) to afford 84.0 mg (13%) of **1r** as colorless foam.

$[\alpha]_D^{25} = +76.4$  ( $c = 1.0$ ,  $\text{CHCl}_3$ )

$^1\text{H NMR}$  (400 MHz,  $\text{CDCl}_3$ ):  $\delta = 9.49$  (d,  $J = 7.9$  Hz, 1H), 6.84 (ddd,  $J = 15.6, 7.2, 6.3$  Hz, 1H), 6.11 (ddt,  $J = 15.6, 7.9, 1.5$  Hz, 1H), 2.66 – 2.52 (m, 2H), 2.49 – 2.22 (m, 3H), 2.22 – 2.14 (m, 1H), 2.13 – 1.98 (m, 3H), 1.92 (dddd,  $J = 15.9, 8.3, 6.3, 3.4$  Hz, 6H), 1.76 (ddt,  $J = 11.9, 7.1, 4.1$  Hz, 2H), 1.67 – 1.56 (m, 2H), 1.50 – 1.38 (m, 2H), 1.37 – 1.26 (m, 4H), 1.18 – 1.07 (m, 1H), 1.10 (s, 3H), 1.05 (s, 3H), 0.88 (d,  $J = 6.2$  Hz, 3H) ppm.  $^{13}\text{C NMR}$  (101 MHz,  $\text{CDCl}_3$ ):  $\delta = 214.2, 212.2, 194.3, 159.4, 133.0, 58.7, 57.7, 46.7, 44.4, 43.8, 42.2, 38.5, 37.0, 36.9, 35.9, 35.7, 35.6, 33.7, 30.0, 27.8, 26.7, 25.6, 24.4, 22.3, 18.8, 11.8$  ppm.

**HRMS (ESI)**:  $m/z$  calculated for  $[\text{C}_{27}\text{H}_{42}\text{NaO}_4]^+ [\text{M}+\text{MeOH}+\text{Na}]^+$ : 453.2975; found: 453.2970.

**6-Chlorohexanal**. Dess-martin periodinane (9.01 mmol, 3.82 g, 1.2 equiv.) was added portionwise to a mixture of 6-chlorohexan-1-ol (7.51 mmol, 1.0 mL, 1.0 equiv.) and water (8.26 mmol, 149  $\mu\text{L}$ , 1.1 equiv.) in DCM (37 mL) previously cooled to 0  $^\circ\text{C}$ . The reaction mixture was let to warm to room temperature and further stirred for 2 h until completion of the reaction. The reaction mixture was then cooled to 0  $^\circ\text{C}$  and carefully quenched by a 1:1 mixture of 10% aq.  $\text{Na}_2\text{S}_2\text{O}_3$  and sat. aq.  $\text{NaHCO}_3$  (50 mL) and let to stir until complete dissolution of the reaction mixture. The organic layer was further washed with a 1:1 mixture of 10% aq.  $\text{Na}_2\text{S}_2\text{O}_3$  and sat. aq.  $\text{NaHCO}_3$  (3x 25 mL) and dried over  $\text{MgSO}_4$ . The volatiles were removed under reduced pressure and the crude was purified by flash column chromatography (silica gel, 25%  $\text{Et}_2\text{O}$  in hexanes) to obtain 6-chlorohexanal (1.01 g, quant.) as a colorless oil. Spectroscopic data are consistent with those previously reported.<sup>18</sup>

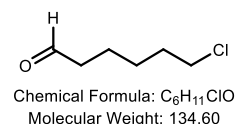

$^1\text{H NMR}$  (400 MHz,  $\text{CDCl}_3$ ):  $\delta = 9.78$  (t,  $J = 1.6$  Hz, 1H), 3.54 (t,  $J = 6.6$  Hz, 2H), 2.47 (td,  $J = 7.3, 1.6$  Hz, 2H), 1.88 – 1.75 (m, 2H), 1.71 – 1.60 (m, 2H), 1.53 – 1.39 (m, 2H) ppm.

**(E)-8-Chlorooct-2-enal (1s)**. Under an atmosphere of argon, a solution of (triphenylphosphoranylidene)acetaldehyde (10.9 mmol, 3.32 g, 1.4 equiv.) and 6-chlorohexanal (7.80 mmol, 1.01 g, 1.0 equiv.) in anhydrous THF (16 mL) was stirred under reflux for 16 h. The reaction mixture was allowed to cool to room temperature and carefully (low boiling point) concentrated under reduced pressure. The crude was purified by flash column chromatography (silica gel, 20%  $\text{Et}_2\text{O}$  in hexanes) to obtain **1s** (324 mg, 26%,  $E/Z = 9:1$ ) as a colorless oil. (NMR spectra contain solvent peaks from FCC due to low boiling point of product).

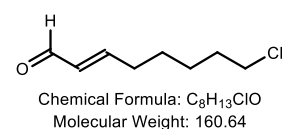

$^1\text{H NMR}$  (300 MHz,  $\text{CDCl}_3$ , mixture of isomers):  $\delta = 9.51$  (d,  $J = 7.9$  Hz, 1H), 7.16 – 7.00 (m, 1H, *Z*-isomer), 6.84 (dt,  $J = 15.6, 6.8$  Hz, 1H, *E*-isomer), 6.34 – 6.25 (m, 1H, *Z*-isomer), 6.12 (ddt,  $J = 15.6, 7.9, 1.5$  Hz, 1H, *E*-isomer), 3.54 (t,  $J = 6.6$  Hz, 3H), 2.43 – 2.31 (m, 2H), 1.93 – 1.72 (m, 2H), 1.63 – 1.45 (m, 4H) ppm.  $^{13}\text{C NMR}$  (101 MHz,  $\text{CDCl}_3$ , major isomer):  $\delta = 194.1, 158.2, 133.4, 44.9, 32.6, 32.4, 27.3, 26.5$  ppm.

**HRMS (ESI)**:  $m/z$  calculated for  $[\text{C}_8\text{H}_{13}\text{ClONa}]^+ [\text{M}+\text{Na}]^+$ : 183.0547; found: 183.0543.

**6-Oxohexanoic acid**. A solution of 6-heptenoic acid (7.21 mol, 977  $\mu\text{L}$ , 1.0 equiv.) in anhydrous DCM (29 mL) was cooled to -78  $^\circ\text{C}$  and degassed with a stream of oxygen. Ozone was then bubbled through the reaction mixture until it turned blue. The reaction was then purged with oxygen to remove excess of ozone and quenched with excess dimethyl sulfide. The reaction mixture was then

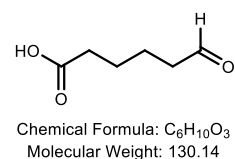

allowed to warm to room temperature, the organic layer was washed with sat. aq.  $\text{NH}_4\text{Cl}$  (3x 30 mL) and dried over  $\text{MgSO}_4$ . The volatiles were removed under reduced pressure to obtain crude 6-oxohexanoic acid (969 mg, quant.) which was engaged in the next step without further purification.

**(E)-8-Oxooct-6-enoic acid (1t).** 6-Oxohexanoic acid (937 mg, 7.20 mmol, 1.0 equiv.) was dissolved in THF (anhydrous, 14.4 mL) under an Argon atmosphere. (Triphenylphosphoranylidene)-acetaldehyde (2.894 g, 9.36 mmol, 1.3 equiv.) was added and the mixture was stirred for 6 days at room temperature. Upon concentration, the residue was purified by column chromatography (silica gel, EtOAc/hexanes/AcOH = 20:79:1) to afford 289 mg (26%) of **1t** as bright yellow solid.

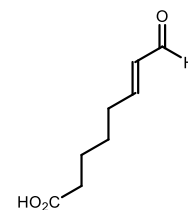

Chemical Formula:  $\text{C}_8\text{H}_{12}\text{O}_3$   
Molecular Weight: 156.1810

$^1\text{H NMR}$  (500 MHz,  $\text{CDCl}_3$ ):  $\delta$  = 9.51 (d,  $J$  = 7.9 Hz, 1H), 6.84 (dt,  $J$  = 15.6, 6.8 Hz, 1H), 6.14 (ddt,  $J$  = 15.6, 7.8, 1.5 Hz, 1H), 2.43 – 2.34 (m, 4H), 1.75 – 1.66 (m, 2H), 1.64 – 1.55 (m, 2H) ppm.  $^{13}\text{C NMR}$  (126 MHz,  $\text{CDCl}_3$ ):  $\delta$  = 194.2, 178.5, 157.9, 133.4, 33.6, 32.4, 27.3, 24.2 ppm. **HRMS (ESI)**:  $m/z$  calculated for  $[\text{C}_8\text{H}_{11}\text{O}_3]^-$  [M-H] $^-$ : 155.0714; found: 155.0714.

**Methyl 5-oxopentanoate.** A few drops of conc. sulfuric acid were added to a solution of  $\delta$ -valerolactone (25.0 mmol, 2.50 g, 1.0 equiv.) in methanol (50 mL) and the reaction mixture was stirred under reflux for 2 h. The solvent was then removed under reduced pressure and the obtained crude was then dissolved in DCM (150 mL) and cooled to 0 °C. Dess-martin periodinane (30.0 mmol, 12.7 g, 1.2 equiv.) was added portionwise to the reaction mixture, followed by water (28.7 mmol, 518  $\mu\text{L}$ , 1.15 equiv.). The reaction mixture was then let to warm to room temperature and further stirred for 2 h until completion of the reaction. The reaction mixture was then cooled to 0 °C and carefully quenched by a 1:1 mixture of 10% aq.  $\text{Na}_2\text{S}_2\text{O}_3$  and sat. aq.  $\text{NaHCO}_3$  (150 mL) and let to stir until complete dissolution of the reaction mixture. The organic layer was further washed with a 1:1 mixture of 10% aq.  $\text{Na}_2\text{S}_2\text{O}_3$  and sat. aq.  $\text{NaHCO}_3$  (3x 100 mL) and dried over  $\text{MgSO}_4$ . The volatiles were removed under reduced pressure and the crude was purified by flash column chromatography (silica gel, 20% EtOAc in hexanes) to obtain methyl 5-oxopentanoate (2.00 g, 62%) as a colorless oil. Spectroscopic data are consistent with those previously reported.<sup>19</sup>

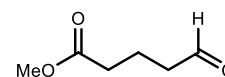

Chemical Formula:  $\text{C}_6\text{H}_{10}\text{O}_3$   
Molecular Weight: 130.14

$^1\text{H NMR}$  (400 MHz,  $\text{CDCl}_3$ ):  $\delta$  = 9.74 (t,  $J$  = 1.3 Hz, 1H), 3.64 (s, 3H), 2.50 (td,  $J$  = 7.2, 1.3 Hz, 2H), 2.35 (t,  $J$  = 7.3 Hz, 2H), 1.93 (qq,  $J$  = 7.1 Hz, 2H) ppm.

**Methyl (E)-7-oxohept-5-enoate (1u).** Under an atmosphere of argon, a solution of (triphenylphosphoranylidene)acetaldehyde (18.4 mmol, 5.61 g, 1.2 equiv.) and methyl 5-oxopentanoate (15.4 mmol, 2.00 g, 1.0 equiv.) in anhydrous THF (31 mL) was stirred under reflux for 16 h. The reaction mixture was allowed to cool to room temperature and concentrated under reduced pressure. The crude was purified by flash column chromatography (silica gel, 5-20% EtOAc in hexanes) to obtain **1u** as a colorless oil. Spectroscopic data are consistent with those previously reported.<sup>20</sup>

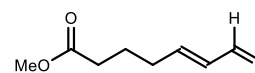

Chemical Formula:  $\text{C}_8\text{H}_{12}\text{O}_3$   
Molecular Weight: 156.18

$^1\text{H NMR}$  (400 MHz,  $\text{CDCl}_3$ ):  $\delta$  = 9.50 (d,  $J$  = 7.8 Hz, 1H), 6.81 (dt,  $J$  = 15.7, 6.7 Hz, 1H), 6.12 (ddt,  $J$  = 15.7, 7.8, 1.5 Hz, 1H), 3.66 (s, 3H), 2.41 – 2.33 (m, 4H), 1.85 (qq,  $J$  = 7.4 Hz, 2H) ppm.

**(E)-3-(trans-2-Phenylcyclopropyl)acrylaldehyde (10).** Under an atmosphere of argon, a solution of (triphenylphosphoranylidene)acetaldehyde (8.28 mmol, 2.52 g, 1.4 equiv.) and (*trans*)-2-phenylcyclopropane-1-carbaldehyde (5.92 mmol, 865 mg, 1.0 equiv. prepared following a reported procedure<sup>21</sup>) in anhydrous THF (12 mL) was stirred under reflux for 16 h. The reaction mixture was allowed to cool to room temperature and concentrated under reduced pressure. The crude was

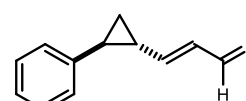

Chemical Formula:  $\text{C}_{12}\text{H}_{12}\text{O}$   
Molecular Weight: 172.23

purified by flash column chromatography (silica gel, 5-10% Et<sub>2</sub>O in hexanes) to obtain **10** (621 mg, 61%) as an orange solid. Spectroscopic data are consistent with those previously reported.<sup>22</sup>

<sup>1</sup>H NMR (400 MHz, CDCl<sub>3</sub>): δ = 9.47 (d, *J* = 7.8 Hz, 1H), 7.34 – 7.26 (m, 2H), 7.25 – 7.19 (m, 1H), 7.14 – 7.07 (m, 2H), 6.46 (dd, *J* = 15.4, 9.7 Hz, 1H), 6.21 (dd, *J* = 15.4, 7.8 Hz, 1H), 2.33 – 2.26 (m, 1H), 1.96 (dddd, *J* = 9.5, 8.3, 5.4, 4.0 Hz, 1H), 1.64 – 1.56 (m, 1H), 1.41 (ddd, *J* = 9.0, 5.3 Hz, 1H) ppm.

## Synthesis of Acrylates 5

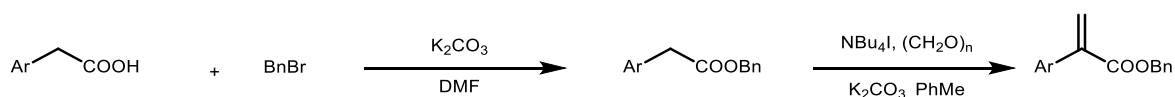

**General procedure A** for the synthesis of benzyl phenylacetate esters: To a 25 mL round bottom flask was added phenylacetic acid (1.05 equiv.), potassium carbonate (0.6 equiv.) and benzyl bromide (1.0 equiv.). DMF (5.0 mL) was added and the reaction stirred at room temperature for 6 hours. Then, water (10 mL) and Et<sub>2</sub>O (10 mL) were added. The layers were separated and the organic layer was washed with water (5 x 10 mL), dried with MgSO<sub>4</sub>, and concentrated *in vacuo* to afford desired ester product. The ester was used directly in the next step without further purification.

**General procedure B** for synthesis of benzyl acrylate esters: the procedure was adopted from a previous report.<sup>23</sup> To a 50 mL round bottom flask was added benzyl phenylacetate ester (1.0 equiv.), potassium carbonate (1.0 equiv.), paraformaldehyde (10.0 equiv.) and tetrabutylammonium iodide (1.0 equiv.). Toluene (30 mL) was added and the reaction was heated at 80 °C and stirred for 4 hours in the dark. The reaction mixture was then washed with water, the layers were separated, and the organic layer was dried with MgSO<sub>4</sub>. The crude product was then concentrated, re-dissolved in 10% Et<sub>2</sub>O in *n*-hexanes and purified by passing through a pad of silica.

**4-Methoxybenzyl 2-phenylacrylate (5a).** Oxalyl chloride (11.4 mmol, 1.0 mL, 1.15 equiv.) was added to a solution of 2-phenylacrylic acid (10.0 mmol, 1.48 g, 1.0 equiv.) in anhydrous DCM (25 mL) under inert atmosphere at 0 °C, followed by a few drops of DMF. The reaction mixture was let to warm to room temperature and stirred until the bubbling ceased.

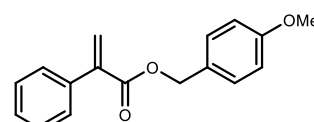

Chemical Formula: C<sub>17</sub>H<sub>16</sub>O<sub>3</sub>  
Molecular Weight: 268.31

The reaction mixture was concentrated under reduced pressure and placed under an inert atmosphere. The crude residue was dissolved in anhydrous DCM (25 mL) and (4-methoxyphenyl)methanol (11.4 mmol, 1.4 mL, 1.15 equiv.), pyridine (11.4 mmol, 922 μL, 1.15 equiv.) and *N,N*-dimethylpyridin-4-amine (1.00 mmol, 122 mg, 0.1 equiv.) were added to the reaction mixture, which was let to stir for 3 h. The reaction mixture was then quenched and washed with 1M HCl (3x 20 mL) and brine (20 mL) and the organic layer was dried over MgSO<sub>4</sub>. The volatiles were removed under reduced pressure and the crude was purified by flash column chromatography (silica gel, 10% EtOAc in hexanes) to obtain **5a** (2.15 g, 80%) as a colorless oil. Spectroscopic data are consistent with those previously reported.<sup>24</sup>

<sup>1</sup>H NMR (400 MHz, CDCl<sub>3</sub>): δ = 7.42 (dtd, *J* = 5.4, 3.1, 1.6 Hz, 2H), 7.38 – 7.33 (m, 5H), 6.94 – 6.88 (m, 2H), 6.37 (d, *J* = 1.2 Hz, 1H), 5.91 (d, *J* = 1.2 Hz, 1H), 5.23 (s, 2H), 3.82 (s, 3H) ppm.

**Methyl 2-phenylacrylate (5b).** Procedure adapted from previous report.<sup>25</sup> To a 25 mL round bottom flask was added 2-phenylacrylic acid (500 mg, 3.37 mmol, 1.05 equiv.), potassium carbonate (267 mg, 0.6 equiv.) and methyl iodide (190  $\mu$ L, 1.0 equiv.). DMF (5.0 mL) was added and reaction was stirred at room temperature for 6 hours. Upon completion of reaction water (10 mL) and Et<sub>2</sub>O (10 mL) was added. The layers were separated in a separatory funnel. The organic layer was washed with water (5 x 10 mL), dried with MgSO<sub>4</sub> and concentrated *in vacuo* to afford desired **5b** as a light-yellow oil (497 mg, 95% yield). The spectroscopic data is consistent with previous report.<sup>26</sup> <sup>1</sup>H NMR (300 MHz, CDCl<sub>3</sub>):  $\delta$  = 7.62 – 7.39 (m, 2H), 7.37 – 7.28 (m, 3H), 6.36 (d, *J* = 1.2 Hz, 1H), 5.89 (d, *J* = 1.2 Hz, 1H), 3.82 (s, 3H) ppm.

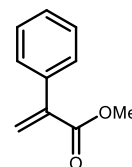

Chemical Formula: C<sub>10</sub>H<sub>10</sub>O<sub>2</sub>  
Molecular Weight: 162,1880

**Benzyl 2-phenylacrylate (5c).** Prepared according to reported procedure<sup>25</sup> using 2-phenylacrylic acid (500 mg, 3.37 mmol, 1.05 equiv.). The product was obtained as a colorless oil which solidifies upon storage at -20 °C (785 mg, 98% yield). The spectroscopic data is consistent with previous report.

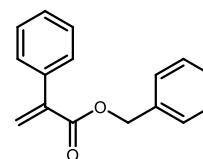

Chemical Formula: C<sub>16</sub>H<sub>14</sub>O<sub>2</sub>  
Molecular Weight: 238,2860

<sup>1</sup>H NMR (400 MHz, CDCl<sub>3</sub>):  $\delta$  = 7.40-7.29 (m, 10H), 6.39 (d, *J* = 1.0 Hz, 1H), 5.93 (d, *J* = 1.0 Hz, 1H), 5.29 (s, 2H) ppm.

**Benzyl 2-(p-tolyl)acetate.** Prepared according to general procedure A using p-tolyl acetic acid (510 mg, 3.40 mmol). The product was obtained as a colorless oil (707 mg, 91% yield). The spectroscopic data is consistent with previous report.<sup>23</sup>

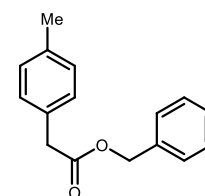

Chemical Formula: C<sub>16</sub>H<sub>16</sub>O<sub>2</sub>  
Molecular Weight: 240,3020

<sup>1</sup>H NMR (400 MHz, CDCl<sub>3</sub>):  $\delta$  = 7.44 – 7.24 (m, 5H), 7.18 (d, *J* = 8.1 Hz, 2H), 7.14 (d, *J* = 8.0 Hz, 2H), 5.13 (s, 2H), 3.64 (s, 2H), 2.34 (s, 3H) ppm.

**Benzyl 2-(p-tolyl)acrylate (5d).** Prepared according to general procedure B using benzyl 2-(p-tolyl)acetate (707 mg, 2.94 mmol). The product was obtained as a colorless oil (390 mg, 55% yield).

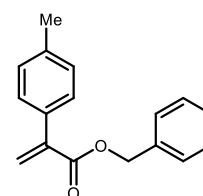

Chemical Formula: C<sub>17</sub>H<sub>16</sub>O<sub>2</sub>  
Molecular Weight: 252,3130

<sup>1</sup>H NMR (500 MHz, CDCl<sub>3</sub>):  $\delta$  = 7.46 – 7.29 (m, 7H), 7.21 – 7.07 (m, 2H), 6.35 (d, *J* = 1.2 Hz, 1H), 5.89 (d, *J* = 1.2 Hz, 1H), 5.29 (s, 2H), 2.34 (s, 3H) ppm. The spectroscopic data is consistent with previous report.<sup>23</sup>

**Benzyl 2-(3-methoxyphenyl)acetate.** Prepared according to general procedure A using 3-methoxyphenyl acetic acid (500 mg, 3.01 mmol). The product was obtained as a colorless oil (713 mg, 96% yield).

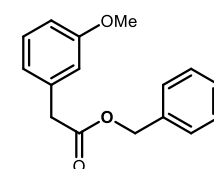

Chemical Formula: C<sub>16</sub>H<sub>16</sub>O<sub>3</sub>  
Molecular Weight: 256,3010

<sup>1</sup>H NMR (500 MHz, CDCl<sub>3</sub>):  $\delta$  = 7.43 – 7.28 (m, 5H), 7.24 (t, *J* = 7.8 Hz, 1H), 6.90 – 6.79 (m, 3H), 5.14 (s, 2H), 3.78 (s, 3H), 3.65 (s, 2H) ppm. <sup>13</sup>C NMR (126 MHz, CDCl<sub>3</sub>):  $\delta$  = 171.4, 159.9, 136.0, 135.4, 129.7, 128.7, 128.4, 128.3, 121.8, 114.9, 113.0, 66.8, 55.3, 41.5 ppm.

HRMS (ESI): *m/z* calculated for [C<sub>16</sub>H<sub>16</sub>O<sub>3</sub>Na]<sup>+</sup> [M+Na]<sup>+</sup>: 279.0992, found: 279.0982.

**Benzyl 2-(3-methoxyphenyl)acrylate (5e).** Prepared according to the general procedure **B** using benzyl 2-(3-methoxyphenyl)acetate (384 mg, 1.50 mmol). The product was obtained as a light yellow oil (150 mg, 37% yield).

$^1\text{H NMR}$  (500 MHz,  $\text{CDCl}_3$ ):  $\delta = 7.49 - 7.33$  (m, 5H), 7.30 (dd,  $J = 8.2, 7.7$  Hz, 1H), 7.05 (ddd,  $J = 7.6, 1.6, 1.0$  Hz, 1H), 7.01 (dd,  $J = 2.6, 1.6$  Hz, 1H), 6.92 (ddd,  $J = 8.3, 2.6, 0.9$  Hz, 1H), 6.42 (d,  $J = 1.2$  Hz, 1H), 5.95 (d,  $J = 1.2$  Hz, 1H), 5.31 (s, 2H), 3.81 (s, 3H) ppm.  $^{13}\text{C NMR}$  (126 MHz,  $\text{CDCl}_3$ ):  $\delta = 166.5, 159.4, 141.2, 138.0, 136.0, 129.2, 128.7, 128.3, 128.3, 127.2, 120.9, 114.0$  (2C), 66.9, 55.3 ppm.

**HRMS (ESI):**  $m/z$  calculated for  $[\text{C}_{17}\text{H}_{16}\text{O}_3\text{Na}]^+ [\text{M}+\text{Na}]^+$ : 291.0992, found: 291.0978.

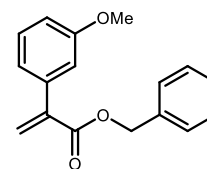

Chemical Formula:  $\text{C}_{17}\text{H}_{16}\text{O}_3$   
Molecular Weight: 268,3120

**Benzyl 2-(4-fluorophenyl)acetate.** Prepared according to the general procedure **A** using 4-fluorophenyl acetic acid (510 mg, 3.31 mmol). The product was obtained as a colorless oil, which solidifies upon storage at  $-20^\circ\text{C}$  (725 mg, 94% yield). The spectroscopic data is consistent with previous report.<sup>27</sup>

$^1\text{H NMR}$  (400 MHz,  $\text{CDCl}_3$ ):  $\delta = 7.37 - 7.28$  (m, 5H), 7.36 - 7.21 (m, 2H), 6.99 (t,  $J = 8.7$  Hz, 2H), 5.13 (s, 2H), 3.63 (s, 2H) ppm.

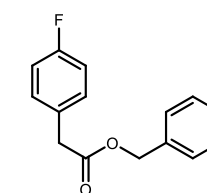

Chemical Formula:  $\text{C}_{15}\text{H}_{13}\text{FO}_2$   
Molecular Weight: 244,2654

**Benzyl 2-(4-fluorophenyl)acrylate (5f).** Prepared according to general procedure **B** using benzyl 2-(4-fluorophenyl)acetate (770 mg, 3.15 mmol). The product was obtained as a light-yellow oil which solidifies upon storage at  $-20^\circ\text{C}$  (561 mg, 69% yield).

$^1\text{H NMR}$  (500 MHz,  $\text{CDCl}_3$ ):  $\delta = 7.45 - 7.30$  (m, 7H), 7.09 - 7.00 (m, 2H), 6.40 (d,  $J = 1.1$  Hz, 1H), 5.90 (d,  $J = 1.1$  Hz, 1H), 5.27 (s, 2H) ppm.  $^{13}\text{C NMR}$  (126 MHz,  $\text{CDCl}_3$ ):  $\delta = 166.5, 162.9$  (d,  $J_{\text{C-F}} = 247.7$  Hz), 140.3, 136.0, 132.8 (d,  $J_{\text{C-F}} = 3.3$  Hz), 130.2 (d,  $J_{\text{C-F}} = 8.1$  Hz), 128.7, 128.4, 128.3, 127.3, 115.2 (d,  $J_{\text{C-F}} = 21.6$  Hz), 67.0 ppm.  $^{19}\text{F}\{^1\text{H}\}$  NMR (471 MHz,  $\text{CDCl}_3$ ):  $\delta = -113.79$  ppm.

**HRMS (ESI):**  $m/z$  calculated  $[\text{C}_{16}\text{H}_{13}\text{FO}_2\text{Na}]^+ [\text{M}+\text{Na}]^+$ : 279.0792, found: 279.0787.

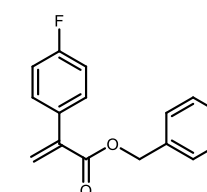

Chemical Formula:  $\text{C}_{16}\text{H}_{13}\text{FO}_2$   
Molecular Weight: 256,2764

## Preparation of Dihydropyridine R-1

**Triethyl 2,6-dimethyl-1,4-dihydropyridine-3,4,5-tricarboxylate (R-1).** Ethyl glyoxylate (50 % by weight in PhMe, 11.0 mL, 1.0 equiv., 55.5 mmol) and ethyl (Z)-3-aminobut-2-enoate (14.0 mL, 2.0 equiv., 111 mmol) was stirred in glacial acetic acid (25 mL) for 16 hours. After removal of volatiles, the residue was transferred to a separation funnel containing aqueous  $\text{NaHCO}_3$  (saturated, 100 mL) and the product was extracted with EtOAc (3 x 200 mL). After concentration of the combined organic layers, the product was purified by flash column chromatography (silica, 25% EtOAc in n-hexanes) to afford a bright yellow solid, which was then recrystallized from  $\text{CH}_2\text{Cl}_2/\text{n-hexanes}$  to afford **R-1** as a white crystalline solid. (7.27 g, 40% yield)

$^1\text{H NMR}$  (500 MHz,  $\text{CDCl}_3$ ):  $\delta = 6.18$  (br s, 1H), 4.82 (s, 1H), 4.28 - 4.11 (m, 4H), 4.07 (q,  $J = 7.1$  Hz, 2H), 2.28 (s, 6H), 1.28 (t,  $J = 7.1$  Hz, 6H), 1.20 (t,  $J = 7.1$  Hz, 3H) ppm.  $^{13}\text{C NMR}$  (126 MHz,  $\text{CDCl}_3$ ):  $\delta = 174.4, 167.4, 145.6, 98.8, 60.8, 60.1, 40.7, 19.3, 14.5, 14.3$  ppm.

**HRMS (ESI):**  $m/z$  calculated for  $[\text{C}_{16}\text{H}_{23}\text{NO}_6\text{Na}]^+ [\text{M}+\text{Na}]^+$ : 348.1418, found: 348.1412.

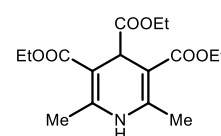

Chemical Formula:  $\text{C}_{16}\text{H}_{23}\text{NO}_6$   
Molecular Weight: 325,3610

## General Procedure for the Conjugate Cyanation of Enals

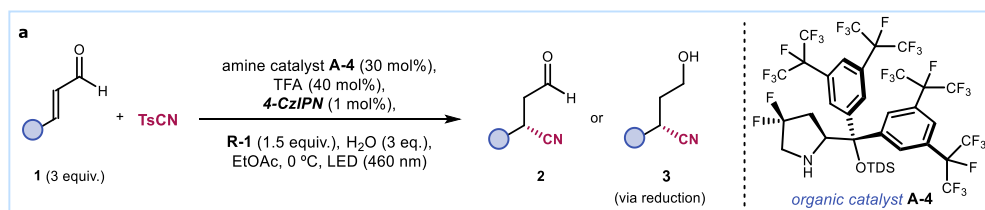

**General procedure C (for 0.25 mmol scale):** An 8.0 mL vial equipped with a stirring bar was charged with tosyl cyanide (48 mg, 250  $\mu\text{mol}$ , 95% purity, 1.0 equiv.), the chiral amine catalyst **A-4** (83 mg, 75.0  $\mu\text{mol}$ , 0.3 equiv.), **R-1** (122 mg, 375  $\mu\text{mol}$ , 1.5 equiv.), 4-CzIPN (2 mg, 2.50  $\mu\text{mol}$ , 1 mol%) and enal **1** (3.0 equiv.). The vial was sealed with a septum and purged with Argon. The reactants were suspended in EtOAc (500  $\mu\text{L}$ , ensure that all compounds are suspended) and deionized water (13.5  $\mu\text{L}$ , 3.0 equiv.) was added. Then, TFA (7.5  $\mu\text{L}$ , 100  $\mu\text{mol}$ , 0.4 eq) was added and the vial was instantly placed in a pre-cooled metal support (set for an internal temperature of 5  $^\circ\text{C}$ ) mounted on an aluminum block fitted with a high-power single blue LED ( $\lambda_{\text{max}} = 460 \text{ nm}$ , irradiance set at 90  $\text{mW}/\text{cm}^2$  as controlled by an external power supply). The set-up secured a reliable irradiation while keeping a distance of 1 cm between the reaction vessel and the light source (set-up detailed in **Supplementary Figure 1**). After 16 hours (unless otherwise stated), the mixture was concentrated under reduced pressure.

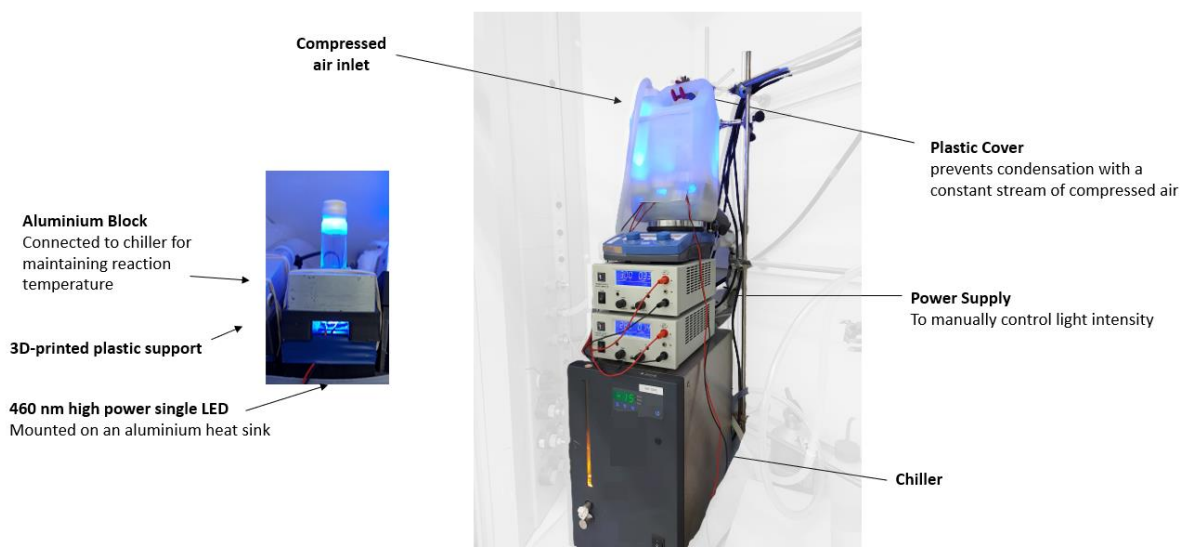

**Supplementary Figure 1:** Detailed set-up and illumination system used in these studies. The light source consisted of a single 460 nm high-power LED (LZ1-00DB00) purchased from LedEngin; distance between LED and reaction vessel = 1 cm.

**Determination of analytical yields for the conjugate cyanation of enals.** Analytical yields were determined by  $^1\text{H}$  NMR analysis (400 MHz) of the crude reaction mixtures using trichloroethylene (TCE, 22.5  $\mu\text{L}$ , 250  $\mu\text{mol}$ , 1.0 equiv.) as the internal standard. For integration, aldehydic peaks have been used ( $d_1 = 6$  seconds). This analysis allowed to infer the analytic yields of both the target cyanation product **2** and the by-product **2'** (arising from the competitive addition of tosyl radical to enal **1**), which was typically formed in a similar amount as the target adduct **2**. For each specific entry (see below), we report the analytical yields of products **2** and **2'**. The aldehydic peaks typically appear in the following order from low to high field, as shown in **Supplementary Figure 2** (case example using octenal **1a**).

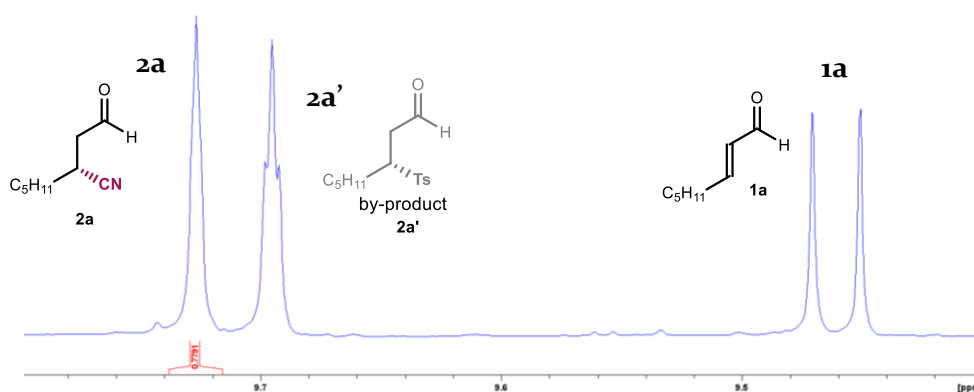

**Supplementary Figure 2:** Crude reaction mixture using **1a** (400 MHz), showing aldehydic products:  $\beta$ -cyanoaldehyde **2a** (br s, left);  $\beta$ -sulfone aldehyde **2a'** (t,  $J = 1.00$  Hz), and octenal starting material **1a** (d,  $J = 8.0$  Hz, right)

It was not always possible to isolate the cyanoaldehydes **2** because of a difficult separation from the  $\beta$ -sulfone aldehyde by-product **2'**. When the direct isolation of pure cyanoaldehydes was not feasible, they were isolated as cyano-alcohols **3** upon reduction of the crude reaction mixture according to **Supplementary Figure 3**. Conversion to alcohols **3** allowed a simple separation from the sulfone by-product **2'**.

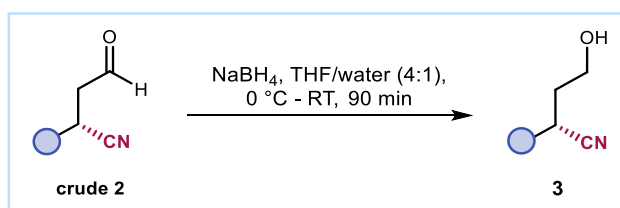

**Supplementary Figure 3:** Reduction of cyanoaldehydes **2** (crude mixture) to their corresponding cyanoalcohols **3**

**Reduction to  $\beta$ -cyanoalcohols **3** (one-pot) - General procedure D:** Upon completion of the organocatalytic conjugate cyanation, the solvent was evaporated and the crude reaction mixture containing **2** was dissolved in THF (2.0 mL); then water (0.5 mL) was added. After cooling to 0 °C with an ice bath,  $\text{NaBH}_4$  (94.6 mg, 2.50 mmol, 10 equiv.) was added in a few portions under vigorous stirring. After 10 minutes, the ice bath was removed and the mixture was stirred for 90 minutes at ambient temperature. After cooling to 0 °C with an ice bath, the slurry was quenched dropwise with 1 N HCl until gas evolution ceased. The mixture was transferred to a separation funnel and extracted with DCM (3 x 20 mL). The combined organic layers were dried with  $\text{MgSO}_4$  and concentrated. The  $\beta$ -cyanoalcohols **3** were isolated under conditions stated at the individual compounds below.

#### Derivatization of products **2** or **3** for determination of the enantiomeric ratio by UPC<sup>2</sup> analysis

In order to determine the enantiomeric ratio of the products,  $\beta$ -cyanoaldehydes **2** were converted into the corresponding 2,4-dinitrophenylhydrazones (see **Supplementary Figure 4**), while  $\beta$ -cyanoalcohols **3** were best analysed upon derivatisation into the corresponding nitrobenzoic esters (**Supplementary Figure 5**).



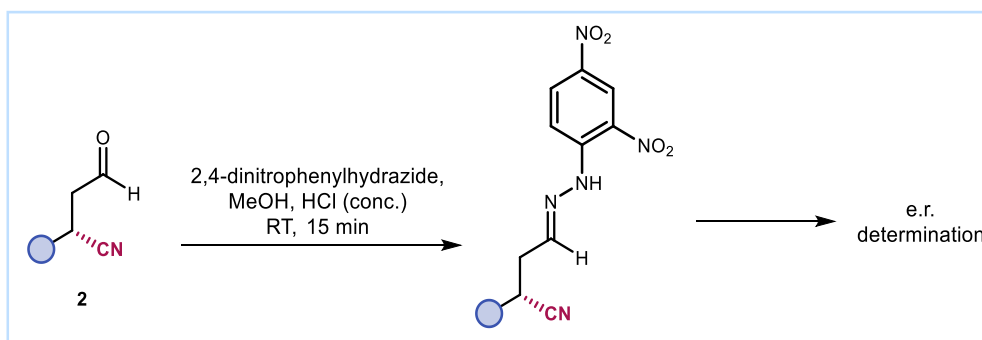

**Supplementary Figure 4:** Preparation of an analytical sample of 2,4-dinitrophenylhydrazones from  $\beta$ -cyanoaldehydes **2**

**Procedure:** A analytical sample of cyanoaldehyde **2** (1.00 mg) and 1 equiv. of 2,4-dinitrophenylhydrazine were dissolved in MeOH (0.3 mL). 1 drop of concentrated HCl was added and the solution was allowed to stand for 15 minutes and then concentrated under reduced pressure. The hydrazone was separated from unreacted hydrazine by preparative TLC and the enantiomeric ratio of the hydrazones was determined by UPC<sup>2</sup> analysis with conditions specified in the experimental section of the individual compounds.

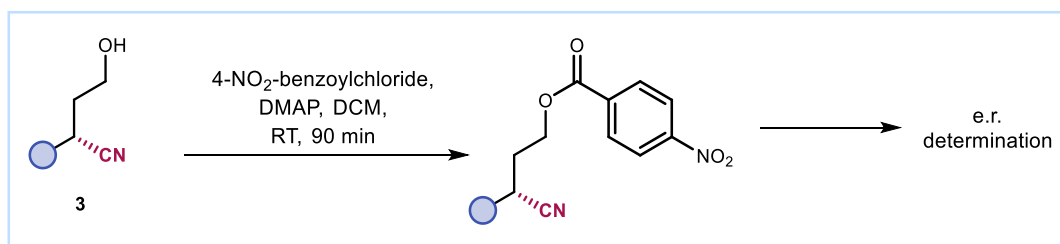

**Supplementary Figure 5:** Preparation of an analytical sample of 4-nitrobenzoic esters from  $\beta$ -cyanoalcohols **3**.

**Procedure:** An analytical sample of cyanoalcohol **3** (1.00 mg) and 1 equiv. of *p*-NO<sub>2</sub>-benzoyl chloride were suspended in DCM (0.3 mL). 1 Equiv. of 4-dimethylaminopyridine (DMAP) was added and the solution was allowed to stir for 90 minutes. The ester was separated from unreacted reactands by preparative TLC and the enantiomeric ratio of the benzoic ester was determined by UPC<sup>2</sup> analysis with conditions specified in the experimental section of the individual compounds.

## Characterization Data for the Conjugate Cyanation of Enals

### (R)-2-(2-Hydroxyethyl)heptanenitrile (**3a**)

Following the general procedure **C** using enal **1a** (750  $\mu$ mol, 94.5 mg), a mixture containing the  $\beta$ -cyanoaldehyde **2a** (77% NMR yield) and the sulfone by-product **2a'** (45% NMR yield) was obtained. The crude target product **2a** was reduced according to the general procedure **D** and the desired alcohol was purified by flash column chromatography (silica gel, 15-20% ethyl acetate in hexanes) to afford product **3a** as a pale-yellow oil (29.0 mg, 75% yield). The enantiomeric ratio of the corresponding 4-nitrobenzoate derivative was determined to be 90.5:9.5 by UPC<sup>2</sup> analysis on a Daicel Chiralpak IA-3 column (eluent: 100% CO<sub>2</sub> for 1 min, gradient 100% - 60% CO<sub>2</sub> in CH<sub>3</sub>CN for 5 min, 60% CO<sub>2</sub> in CH<sub>3</sub>CN for 2 min, gradient 60% - 100% CO<sub>2</sub> in CH<sub>3</sub>CN for 1 min; flow rate 2.0 mL/min,  $\lambda$  = 256 nm)  $\tau_{Major}$  = 4.25 min,  $\tau_{Minor}$  = 4.55 min.

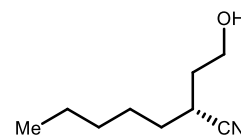

Chemical Formula: C<sub>9</sub>H<sub>17</sub>NO  
Molecular Weight: 155,2410

$[\alpha]_D^{25}$  = -2.0 (c = 1.0, CHCl<sub>3</sub>, 90.5:9.5 e.r.).

<sup>1</sup>H NMR (400 MHz, CDCl<sub>3</sub>):  $\delta$  = 3.86-3.79 (m, 2H), 2.85-2.76 (m, 1H), 1.88-1.78 (m, 2H), 1.69-1.39 (m, 4H), 1.38-1.27 (m, 4H), 0.93-0.87 (t,  $J$  = 6.9 Hz, 3H) ppm. <sup>13</sup>C NMR (126 MHz, CDCl<sub>3</sub>):  $\delta$  = 122.2, 59.9, 35.0, 32.3, 31.4, 28.3, 26.9, 22.5, 14.1 ppm.

HRMS (APCI): m/z calculated for [C<sub>9</sub>H<sub>18</sub>NO]<sup>+</sup> [M+H]<sup>+</sup>: 156.1383; found: 156.1386.

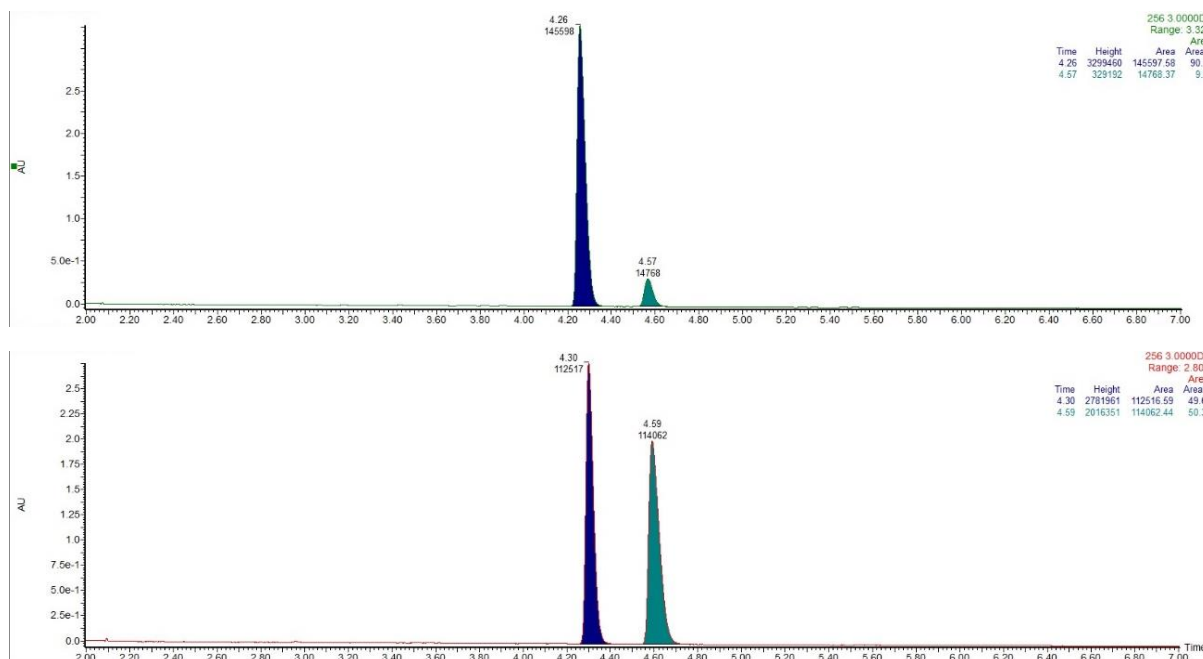

Supplementary Figure 6: UPC<sup>2</sup> traces of **3a**

### (R)-2-(2-Hydroxyethyl)heptanenitrile (**3a**) (*Kessil Lamp Experiment*)

The reaction mixture (0.25 mmol standard scale) was prepared as described above and the vial containing all reactants was instantly placed in a cooling bath (set to 5 °C) using a cryostat. The mixture was irradiated with a Kessil lamp (PR160L-456 nm, 40 W). After 40 hours, the mixture was concentrated under reduced pressure. A mixture containing the  $\beta$ -cyanoaldehyde **2a** (67% NMR yield) and the sulfone by-product **2a'** (73% NMR yield) was obtained. The crude target product **2a** was reduced according to the general procedure **D** and the desired alcohol was purified by flash column chromatography (silica gel, 15-20% ethyl acetate in hexanes) to afford product **3a** as a pale-yellow oil (25.0 mg, 65% yield). Analytical data was in agreement with the product obtained from the single LED experiment as described above. The enantiomeric ratio was determined as described above to be 90:10 by UPC<sup>2</sup> analysis.

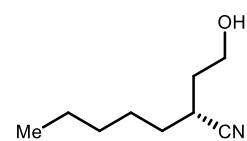

Chemical Formula: C<sub>9</sub>H<sub>17</sub>NO  
Molecular Weight: 155,2410

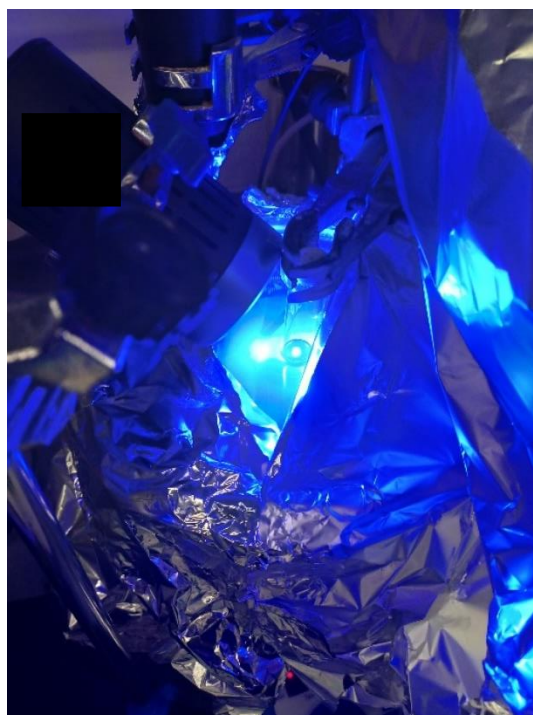

**Supplementary Figure 7:** Set-up for the conjugate cyanation of octenal **1a** using a Kessil lamp (456 nm, maximal intensity). The vial was placed in a cooling bath (Dewar containing toluene) which was cooled to 5 °C by use of a cryostat (Thermo Fisher Scientific - EK90 Immersion Cooler). Distance from the Kessil lamp to the bottom of the vial was approximately 5 cm.

### (R)-2-(2-Hydroxyethyl)heptanenitrile (**3a**) (*1 mmol scale experiment*)

An 8 mL vial equipped with a stirring bar was charged with tosyl cyanide (191 mg, 1.00 mmol, 95% purity, 1.0 equiv.), **A-4** (331 mg, 300  $\mu$ mol, 0.3 equiv.), **R-1** (390 mg, 1.20 mmol, 1.2 equiv.), 4-CzIPN (8 mg, 10.0  $\mu$ mol, 1 mol%) and **1a** (450  $\mu$ L, 3.00 mmol, 3.0 equiv.). The vial was sealed with a septum and purged with Argon. The reactants were suspended in EtOAc (2.00 mL, ensure that all compounds are suspended) and deionized water (54.1  $\mu$ L, 3.0 equiv.) was added. Then, TFA (30.0  $\mu$ L, 400  $\mu$ mol, 400  $\mu$ mol) was added and the vial was instantly placed in a pre-cooled metal block (set for an internal temperature of 5 °C) and irradiated with a high-power single LED (460 nm, irradiance 150 mW/cm<sup>2</sup>). After 40 hours, the mixture was concentrated under reduced pressure.

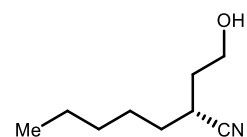

Chemical Formula: C<sub>9</sub>H<sub>17</sub>NO  
Molecular Weight: 155,2410

The crude reaction mixture containing the  $\beta$ -cyanoaldehyde **2a** (58% NMR yield) and the sulfone by-product **2a'** (68% NMR yield) was dissolved in THF (8.00 mL) and then water (2.00 mL) was added. After cooling 0 °C with an ice bath, NaBH<sub>4</sub> (380 mg, 10.0 mmol, 10 equiv.) was added in a few portions while rigorous stirring. After 10 minutes, the ice bath was removed and the mixture was stirred for 90 minutes at ambient temperature. After cooling to 0 °C with an ice bath, the slurry was quenched dropwise with 1 N HCl until gas evolution ceased. The mixture was transferred to a separation funnel and extracted with DCM (3 x 50 mL). The combined organic layers were dried with MgSO<sub>4</sub> and concentrated. A mixture containing the  $\beta$ -cyanoaldehyde with 58% NMR yield was obtained. The crude mixture was purified by flash column chromatography (silica gel, 15-20% ethyl acetate in hexanes) to afford product **3a** as a pale-yellow oil (86.0 mg, 55% yield). Analytical data was in agreement with the product obtained from the 0.25 mmol scale experiment as described above. The enantiomeric ratio of the corresponding 4-nitrobenzoate derivative (**Supplementary Figure 5**) was determined to be 90.5:9.5 by UPC<sup>2</sup> analysis on a Daicel Chiralpak IA-3 column as described for the 0.25 mmol scale experiment.

### (R)-4-Hydroxy-2-methylbutanenitrile (**3b**)

Following the general procedure **C** using enal **1b** (750  $\mu$ mol, 52.5 mg), a mixture containing the  $\beta$ -cyanoaldehyde **2b** (56% NMR yield) and the sulfone by-product **2b'** (45% NMR yield) was obtained. The crude target product **2b** was reduced according to the general procedure **D** and the desired alcohol was purified by flash column chromatography (silica gel, 15-20% ethyl acetate in hexanes) to afford product **3b** as a pale-yellow oil (14.0 mg, 57% yield). *During all operations, low pressure was best avoided due to the high volatility of the compound.* The enantiomeric ratio of the corresponding 4-nitrobenzoate derivative was determined to be 85:15 by UPC<sup>2</sup> analysis on a Daicel Chiralpak IA-3 column (eluent: 100% CO<sub>2</sub> for 1 min, gradient 100% - 90% CO<sub>2</sub> in CH<sub>3</sub>CN for 5 min, 90% CO<sub>2</sub> in CH<sub>3</sub>CN for 2 min, gradient 90% - 100% CO<sub>2</sub> in CH<sub>3</sub>CN for 1 min; flow rate 2.0 mL/min,  $\lambda = 255$  nm)  $\tau_{Major} = 6.15$  min,  $\tau_{Minor} = 6.30$  min.

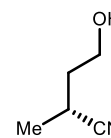

Chemical Formula: C<sub>5</sub>H<sub>9</sub>NO  
Molecular Weight: 99,1330

$[\alpha]_D^{25} = -43.7$  (c = 0.5, CHCl<sub>3</sub>, 85:15 e.r.).

<sup>1</sup>H NMR (400 MHz, CDCl<sub>3</sub>):  $\delta = 3.81$  (dd,  $J = 6.6, 5.4$  Hz, 2H), 2.94-2.84 (m, 1H), 1.90-1.74 (m, 2H), 1.35 (d,  $J = 7.1$  Hz, 3H) ppm. <sup>13</sup>C NMR (101 MHz, CDCl<sub>3</sub>):  $\delta = 123.0, 59.6, 36.6, 22.2, 18.0$  ppm.

HRMS: not obtained due to volatility

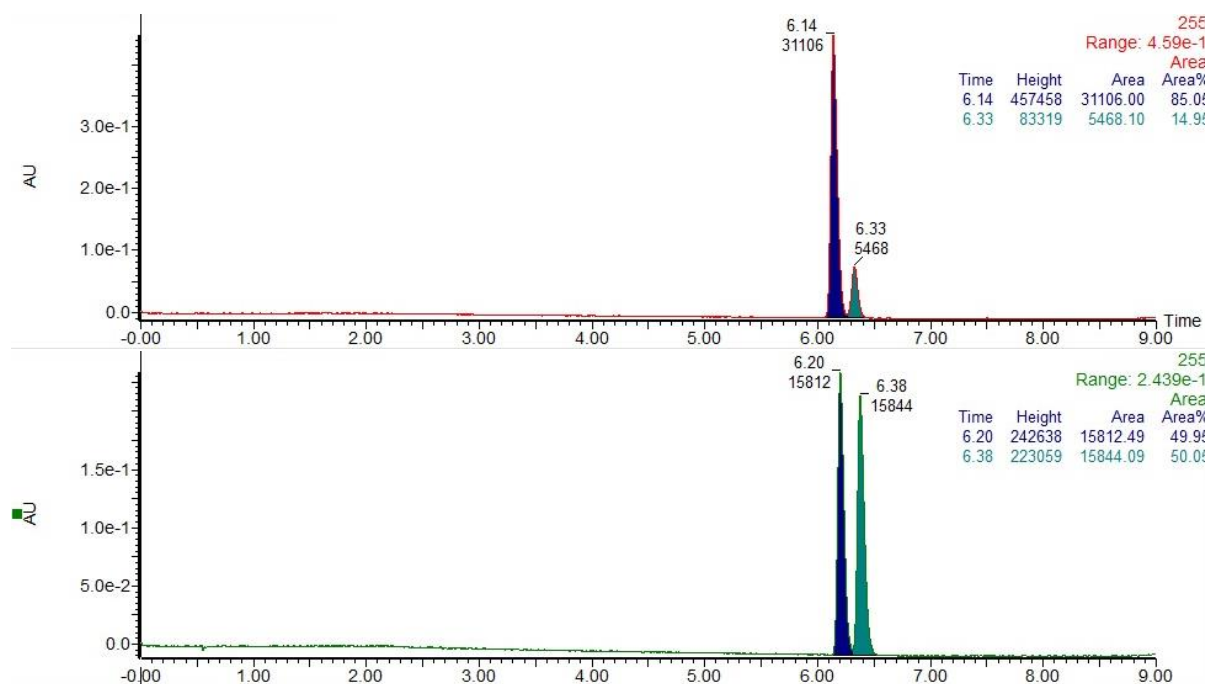

Supplementary Figure 8: UPC<sup>2</sup> traces of **3b**.

### (R)-2-(2-Hydroxyethyl)-4-methylpentanenitrile (**3c**)

Following the general procedure **C** using enal **1c** (750  $\mu$ mol, 187 mg, 45 w% in hexanes), a mixture containing the  $\beta$ -cyanoaldehyde **2c** (60% NMR yield) and the sulfone by-product **2c'** (85% NMR yield) was obtained. The crude target product **2c** was reduced according to the general procedure **D** and the desired alcohol was purified by flash column chromatography (silica gel, 15-20% ethyl acetate in hexanes) to afford product **3c** as a colorless oil (19.5 mg, 56% yield). The enantiomeric ratio of the corresponding 4-nitrobenzoate derivative was determined to be 89.5:10.5 by UPC<sup>2</sup> analysis on a Daicel Chiralpak IA-3 column (eluent: 100% CO<sub>2</sub> for 1 min, gradient 100% - 60% CO<sub>2</sub> in CH<sub>3</sub>CN for 5 min, 60% CO<sub>2</sub> in CH<sub>3</sub>CN for 2 min, gradient 60% - 100% CO<sub>2</sub> in CH<sub>3</sub>CN for 1 min; flow rate 2.0 mL/min,  $\lambda$  = 256 nm)  $\tau_{Major}$  = 3.90 min,  $\tau_{Minor}$  = 4.15 min.

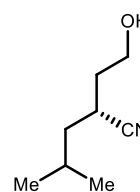

Chemical Formula: C<sub>8</sub>H<sub>15</sub>NO  
Molecular Weight: 141,2140

$[\alpha]_D^{25}$  = -1.2 (c = 0.5, CHCl<sub>3</sub>, 89.5:10.5 e.r.).

<sup>1</sup>H NMR (400 MHz, CDCl<sub>3</sub>):  $\delta$  = 3.83 (t, *J* = 5.7 Hz, 2H), 2.92 – 2.78 (m, 1H), 1.94 – 1.74 (m, 3H), 1.72 (br s, OH), 1.63 (ddd, *J* = 13.5, 10.4, 5.0 Hz, 1H), 1.33 (ddd, *J* = 13.5, 9.3, 5.4 Hz, 1H), 0.97 (d, *J* = 6.6 Hz, 3H), 0.94 (d, *J* = 6.6 Hz, 3H) ppm. <sup>13</sup>C NMR (126 MHz, CDCl<sub>3</sub>):  $\delta$  = 122.2, 59.8, 41.3, 35.3, 26.4, 26.3, 23.0, 21.6 ppm.

HRMS (APCI): *m/z* calculated for [C<sub>8</sub>H<sub>16</sub>NO]<sup>+</sup> [M+H]<sup>+</sup>: 142.1226; found: 142.1231.

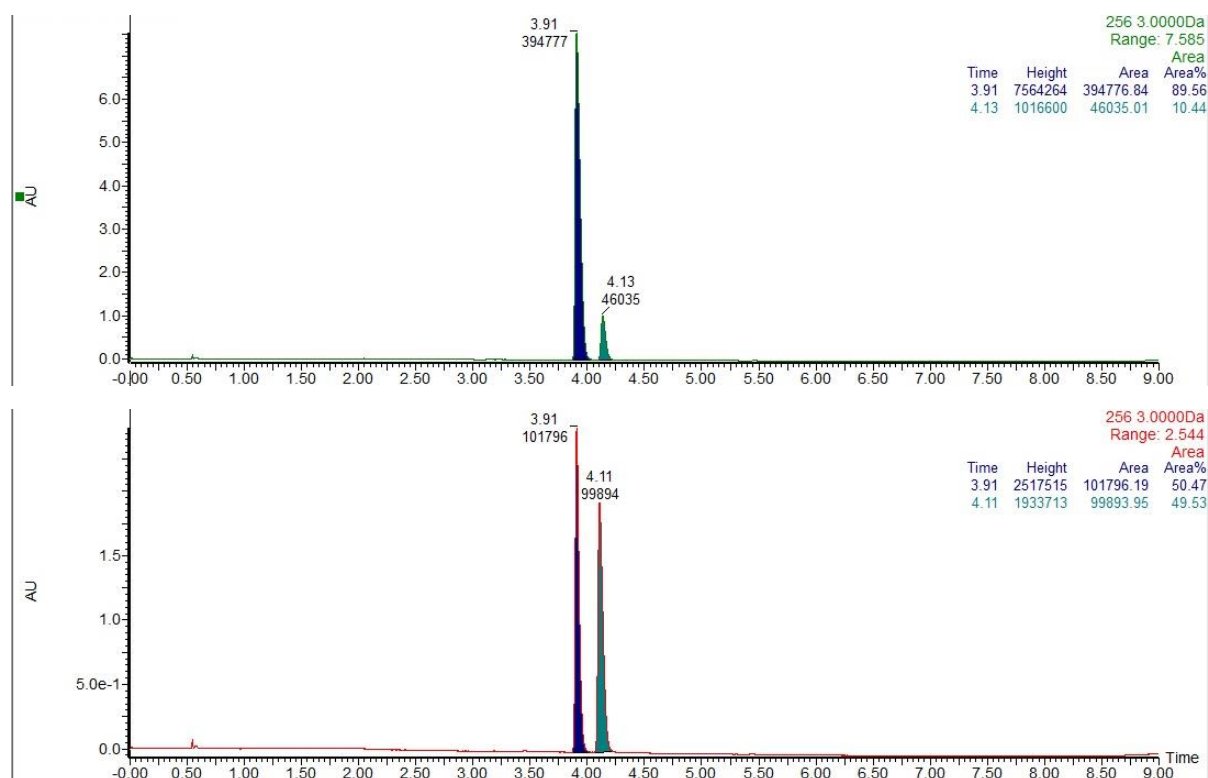

Supplementary Figure 9: UPC<sup>2</sup> traces of **3c**.

### (S)-4-Hydroxy-2-isopropylbutanenitrile (**3d**)

Following the general procedure **C** using enal **1d** (750  $\mu$ mol, 73.5 mg), a mixture containing the  $\beta$ -cyanoaldehyde **2d** (42% NMR yield) and the sulfone by-product **2d'** (> 95% NMR yield) was obtained. The crude target product **2d** was reduced according to the general procedure **D** and the desired alcohol was purified by flash column chromatography (silica gel, 15-20% ethyl acetate in hexanes) to afford product **3d** as a pale-yellow oil (13.0 mg, 42% yield). *During all operations, low pressure was best avoided due to potential volatility.* The enantiomeric ratio of the corresponding 4-nitrobenzoate derivative was determined to be 92:8 by UPC<sup>2</sup> analysis on a Daicel Chiralpak IA-3 column (eluent: 100% CO<sub>2</sub> for 1 min, gradient 100% - 60% CO<sub>2</sub> in CH<sub>3</sub>CN for 5 min, 60% CO<sub>2</sub> in CH<sub>3</sub>CN for 2 min, gradient 60% - 100% CO<sub>2</sub> in CH<sub>3</sub>CN for 1 min; flow rate 2.0 mL/min,  $\lambda$  = 256 nm)  $\tau_{Major}$  = 3.95 min,  $\tau_{Minor}$  = 4.05 min.

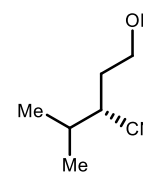

Chemical Formula: C<sub>7</sub>H<sub>13</sub>NO  
Molecular Weight: 127,1870

$[\alpha]_D^{25}$  = -20.9 (c = 0.5, CHCl<sub>3</sub>, 92:8 e.r.).

<sup>1</sup>H NMR (400 MHz, CDCl<sub>3</sub>):  $\delta$  = 3.92-3.76 (m, 2H), 2.79-2.69 (m, 1H), 1.96-1.74 (m, 3H), 1.08 (dd, *J* = 7.9, 6.7 Hz, 6H) ppm. <sup>13</sup>C NMR (126 MHz, CDCl<sub>3</sub>):  $\delta$  = 121.0, 60.2, 35.5, 32.8, 30.2, 21.1, 18.7 ppm.

HRMS (APCI): *m/z* calculated for [C<sub>7</sub>H<sub>14</sub>NO]<sup>+</sup> [M+H]<sup>+</sup>: 128.1070; found: 128.1071.

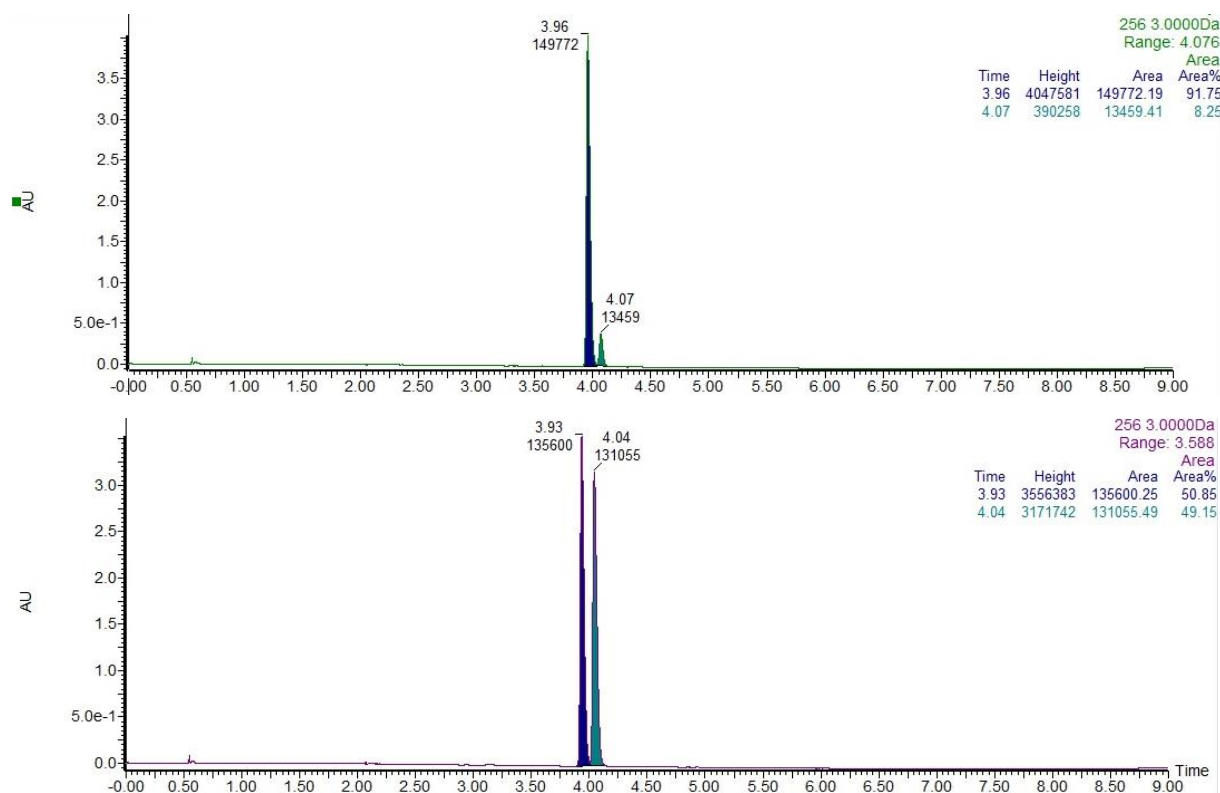

Supplementary Figure 10: UPC<sup>2</sup> traces of **3d**.

### (R)-4-Hydroxy-2-phenethylbutanenitrile (3e)

Following the general procedure **C** using enal **1e** (750  $\mu$ mol, 120 mg), a mixture containing the  $\beta$ -cyanoaldehyde **2e** (71% NMR yield) and the sulfone by-product **2e'** (73% NMR yield) was obtained. The crude target product **2e** was reduced according to the general procedure **D** and the desired alcohol was purified by flash column chromatography (silica gel, 15-20% ethyl acetate in hexanes) to afford product **3e** as a colorless oil (35.0 mg, 74% yield). The enantiomeric ratio of the corresponding 4-nitrobenzoate derivative was determined to be 90:10 by UPC<sup>2</sup> analysis on a Daicel Chiralpak IA-3 column (eluent: 100% CO<sub>2</sub> for 1 min, gradient 100% - 60% CO<sub>2</sub> in CH<sub>3</sub>CN for 5 min, 60% CO<sub>2</sub> in CH<sub>3</sub>CN for 2 min, gradient 60% - 100% CO<sub>2</sub> in CH<sub>3</sub>CN for 1 min; flow rate 2.0 mL/min,  $\lambda = 257$  nm)  $\tau_{Major} = 4.95$  min,  $\tau_{Minor} = 5.10$  min.

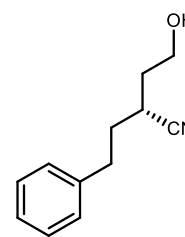

Chemical Formula: C<sub>12</sub>H<sub>15</sub>NO  
Molecular Weight: 189,2580

$[\alpha]_D^{25} = +30.1$  (c = 1.0, CHCl<sub>3</sub>, 90:10 e.r.).

<sup>1</sup>H NMR (400 MHz, CDCl<sub>3</sub>):  $\delta = 7.34 - 7.28$  (m, 2H), 7.25 - 7.18 (m, 3H), 3.86 - 3.75 (m, 2H), 2.91 (ddd,  $J = 14.1, 9.0, 4.6$  Hz, 1H), 2.86 - 2.71 (m, 2H), 2.04 - 1.80 (m, 4H) ppm. <sup>13</sup>C NMR (126 MHz, CDCl<sub>3</sub>):  $\delta = 140.2, 128.8$  (2C), 128.5 (2C), 126.5, 121.9, 59.7, 34.9, 34.0, 33.4, 27.8 ppm.

HRMS (APCI): m/z calculated for [C<sub>12</sub>H<sub>16</sub>NO]<sup>+</sup> [M+H]<sup>+</sup>: 190.1226; found: 190.1235.

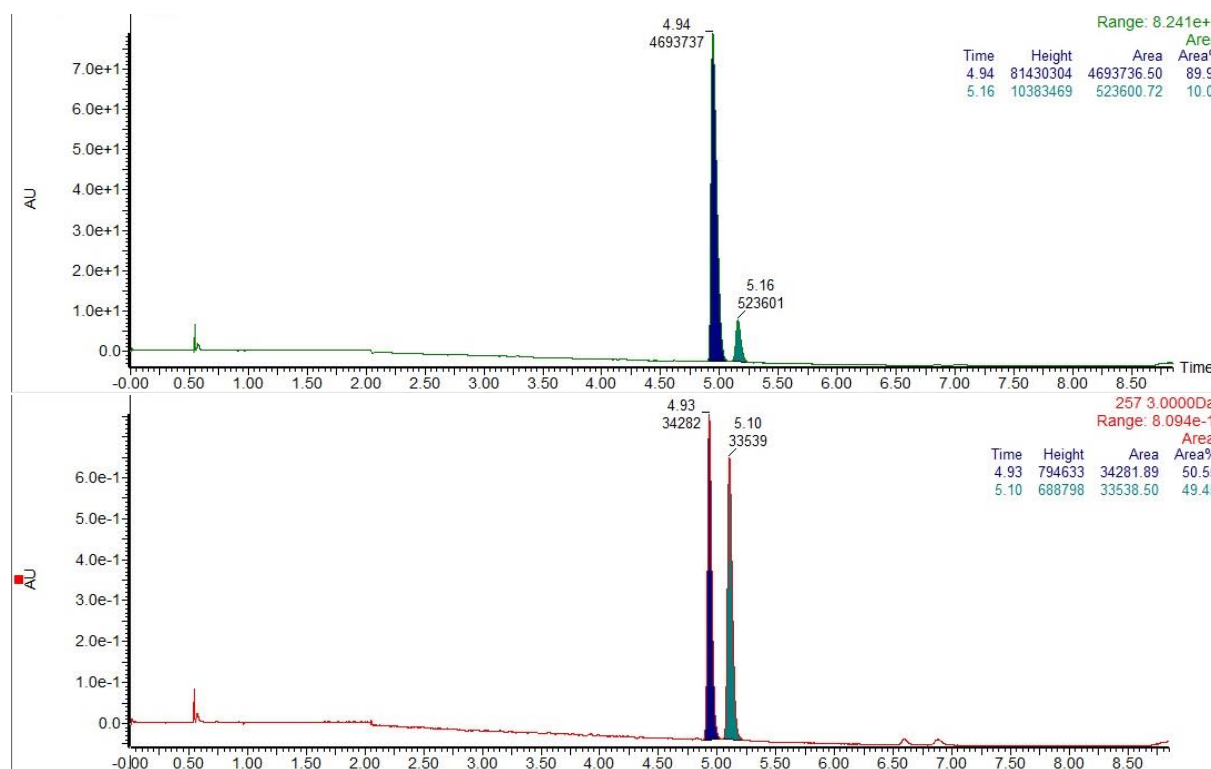

Supplementary Figure 11: UPC<sup>2</sup> traces of **3e**.



### (R)-4-Hydroxy-2-(3-methoxyphenethyl)butanenitrile (**3f**)

Following the general procedure **C** using enal **1f** (750  $\mu$ mol, 143 mg), a mixture containing the  $\beta$ -cyanoaldehyde **2f** (66% NMR yield) and the sulfone by-product **2f'** (64% NMR yield) was obtained. The crude target product **2f** was reduced according to the general procedure **D** and the desired alcohol was purified by flash column chromatography (silica gel, 15-20% ethyl acetate in hexanes) followed by preparative TLC (silica gel, 60% ethylacetate in hexane) to afford product **3f** as a pale-yellow oil (32.0 mg, 58% yield). The enantiomeric ratio of the corresponding 4-nitrobenzoate derivative was determined to be 89.5:10.5 by UPC<sup>2</sup> analysis on a Daicel Chiralpak IE-3 column (eluent: 100% CO<sub>2</sub> for 1 min, gradient 100% - 70% CO<sub>2</sub> in CH<sub>3</sub>CN for 12 min, 70% CO<sub>2</sub> in CH<sub>3</sub>CN for 2 min, gradient 70% - 100% CO<sub>2</sub> in CH<sub>3</sub>CN for 1 min; flow rate 2.0 mL/min,  $\lambda$  = 259 nm)  $\tau_{Major}$  = 11.95 min,  $\tau_{Minor}$  = 12.30 min.

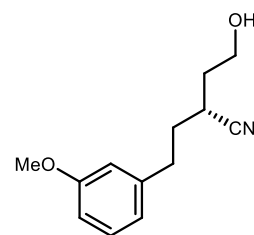

Chemical Formula: C<sub>13</sub>H<sub>17</sub>NO<sub>2</sub>  
Molecular Weight: 219,2840

$[\alpha]_D^{25}$  = +31.6 (c = 1.0, CHCl<sub>3</sub>, 89.5:10.5 e.r.).

<sup>1</sup>H NMR (500 MHz, CDCl<sub>3</sub>):  $\delta$  = 7.22 (t, *J* = 7.7 Hz, 1H), 6.82 – 6.72 (m, 3H), 3.86 – 3.77 (m, 5H), 2.93 – 2.84 (m, 1H), 2.84 – 2.69 (m, 2H), 2.01 – 1.81 (m, 4H) ppm. <sup>13</sup>C NMR (126 MHz, CDCl<sub>3</sub>):  $\delta$  = 159.9, 141.8, 129.8, 121.9, 120.9, 114.3, 111.8, 59.8, 55.3, 34.9, 33.9, 33.5, 27.8 ppm.

HRMS (ESI): *m/z* calculated for [C<sub>13</sub>H<sub>17</sub>NNaO<sub>2</sub>]<sup>+</sup> [M+Na]<sup>+</sup>: 242.1151; found: 242.1146.

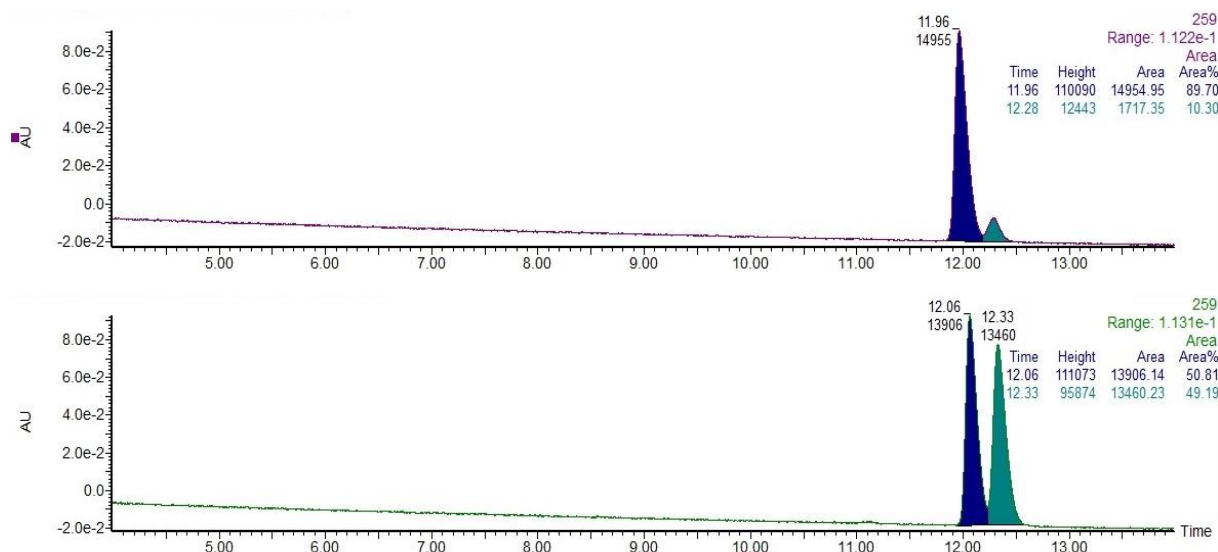

Supplementary Figure 12: UPC<sup>2</sup> traces of **3f**.

### (R)-4-Hydroxy-2-(3-(trifluoromethyl)phenethyl)butanenitrile (**3g**)

Following the general procedure **C** using enal **1g** (750  $\mu$ mol, 171 mg), a mixture containing the  $\beta$ -cyanoaldehyde **2g** (78% NMR yield) and the sulfone by-product **2g'** (79% NMR yield) was obtained. The crude target product **2g** was reduced according to the general procedure **D** and the desired alcohol was purified by flash column chromatography (silica gel, 15-20% ethyl acetate in hexanes) to afford product **3g** as a colorless oil (44.5 mg, 70% yield). The enantiomeric ratio of the corresponding 4-nitrobenzoate derivative was determined to be 90:10 by UPC<sup>2</sup> analysis on a Daicel Chiralpak ID-3 column (eluent: 100% CO<sub>2</sub> for 1 min, gradient 100% - 60% CO<sub>2</sub> in CH<sub>3</sub>CN for 5 min, 60% CO<sub>2</sub> in CH<sub>3</sub>CN for 2 min, gradient 60% - 100% CO<sub>2</sub> in CH<sub>3</sub>CN for 1 min; flow rate 2.0 mL/min,  $\lambda$  = 256 nm)  $\tau_{Major}$  = 4.15 min,  $\tau_{Minor}$  = 4.35 min.

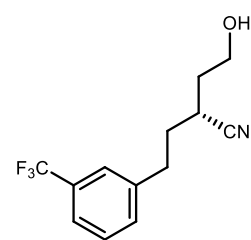

Chemical Formula: C<sub>13</sub>H<sub>14</sub>F<sub>3</sub>NO  
Molecular Weight: 257,2562

$[\alpha]_D^{25}$  = +14.4 (c = 1.0, CHCl<sub>3</sub>, 90:10 e.r.).

<sup>1</sup>H NMR (400 MHz, CDCl<sub>3</sub>):  $\delta$  = 7.38 – 7.21 (m, 4H), 3.75 – 3.60 (m, 2H), 2.83 (ddd,  $J$  = 14.7, 9.6, 5.5 Hz, 1H), 2.75 – 2.61 (m, 2H), 1.91 – 1.65 (m, 4H) ppm. <sup>13</sup>C NMR (101 MHz, CDCl<sub>3</sub>):  $\delta$  = 141.2, 132.0 (q,  $J$  = 1.5 Hz), 131.1 (q,  $J$  = 32.2 Hz), 129.2, 125.2 (q,  $J$  = 3.6 Hz), 124.20 (q,  $J$  = 272.3 Hz), 123.5 (q,  $J$  = 3.9 Hz), 121.6, 59.6, 34.8, 33.8, 33.3, 27.9 ppm. <sup>19</sup>F NMR (376 MHz, CDCl<sub>3</sub>):  $\delta$  = -62.7 ppm.

HRMS (ESI):  $m/z$  calculated for [C<sub>13</sub>H<sub>14</sub>F<sub>3</sub>NNaO]<sup>+</sup> [M+Na]<sup>+</sup>: 280.0920; found: 280.0919.

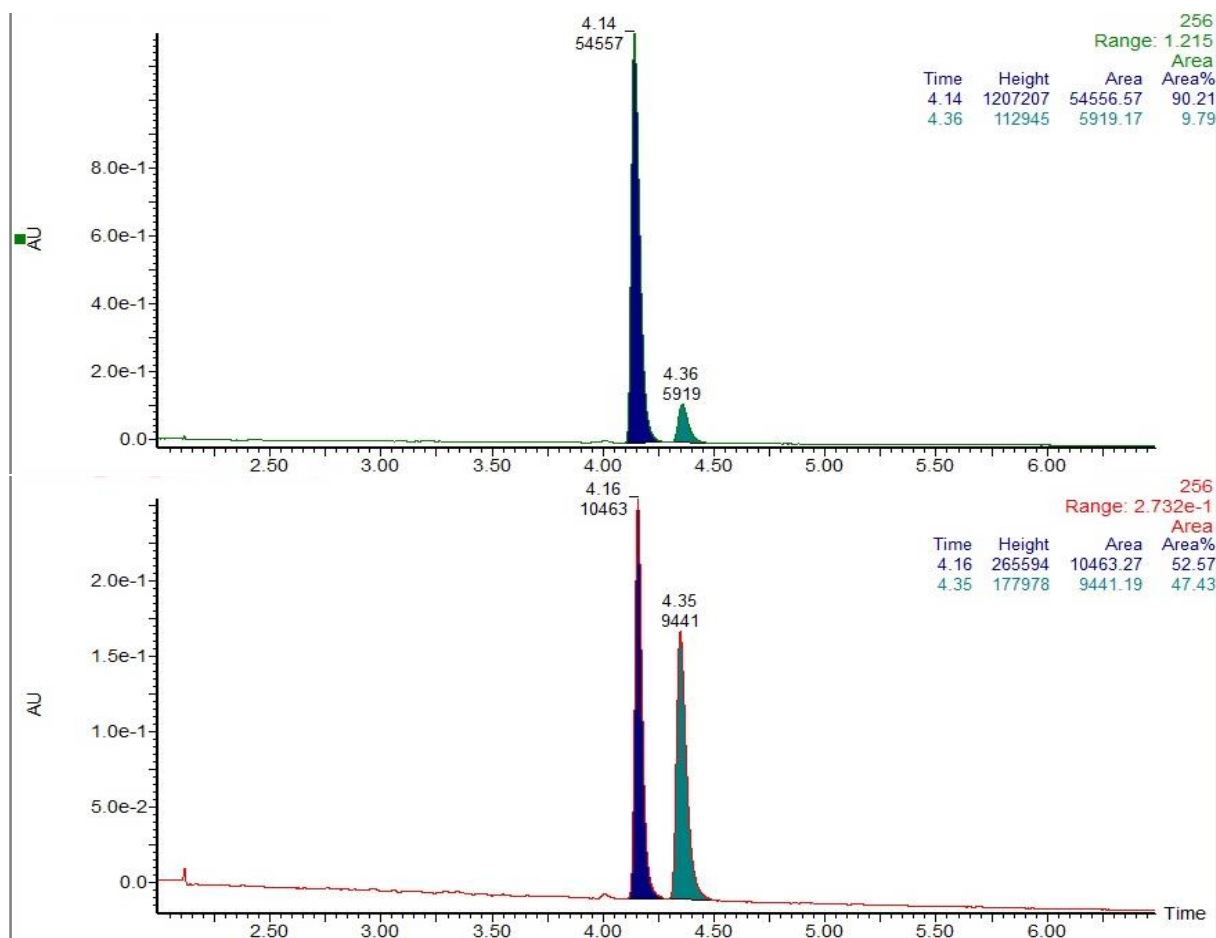

Supplementary Figure 13: UPC<sup>2</sup> traces of **3g**.

### (R)-2-(4-Bromophenethyl)-4-hydroxybutanenitrile (**3h**)

Following the general procedure **C** using enal **1h** (750  $\mu$ mol, 179 mg), a mixture containing the  $\beta$ -cyanoaldehyde **2h** (57% NMR yield) and the sulfone by-product **2h'** (61% NMR yield) was obtained. The crude target product **2h** was reduced according to the general procedure **D** and the desired alcohol was purified by flash column chromatography (silica gel, 15-20% ethyl acetate in hexanes) to afford product **3h** as a pale yellow oil (34.5 mg, 52% yield). The enantiomeric ratio of the corresponding 4-nitrobenzoate derivative was determined to be 90:10 by UPC<sup>2</sup> analysis on a Daicel Chiralpak IA-3 column (eluent: 100% CO<sub>2</sub> for 1 min, gradient 100% - 60% CO<sub>2</sub> in CH<sub>3</sub>CN for 5 min, 60% CO<sub>2</sub> in CH<sub>3</sub>CN for 2 min, gradient 60% - 100% CO<sub>2</sub> in CH<sub>3</sub>CN for 1 min; flow rate 2.0 mL/min,  $\lambda$  = 257 nm)  $\tau_{Major}$  = 5.70 min,  $\tau_{Minor}$  = 6.00 min.

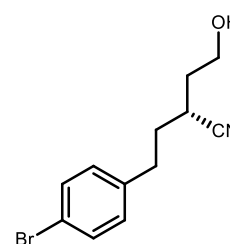

Chemical Formula: C<sub>12</sub>H<sub>14</sub>BrNO  
Molecular Weight: 268,1540

$[\alpha]_D^{25}$  = +26.1 (c = 1.0, CHCl<sub>3</sub>, 90:10 e.r.).

<sup>1</sup>H NMR (400 MHz, CDCl<sub>3</sub>):  $\delta$  = 7.41 (d, *J* = 8.4 Hz, 2H), 7.08 (d, *J* = 8.6 Hz, 2H), 3.82 (br t, *J* = 5.5 Hz, 2H), 2.92 – 2.66 (m, 3H), 2.01 – 1.76 (m, 4H) ppm. <sup>13</sup>C NMR (101 MHz, CDCl<sub>3</sub>):  $\delta$  = 139.2, 131.9 (2C), 130.3 (2C), 121.7, 120.4, 59.7, 34.9, 33.8, 32.9, 27.7 ppm.

HRMS (ESI): *m/z* calculated for [C<sub>12</sub>H<sub>14</sub>BrNNaO]<sup>+</sup> [M+Na]<sup>+</sup>: 290.0151 found: 290.0155.

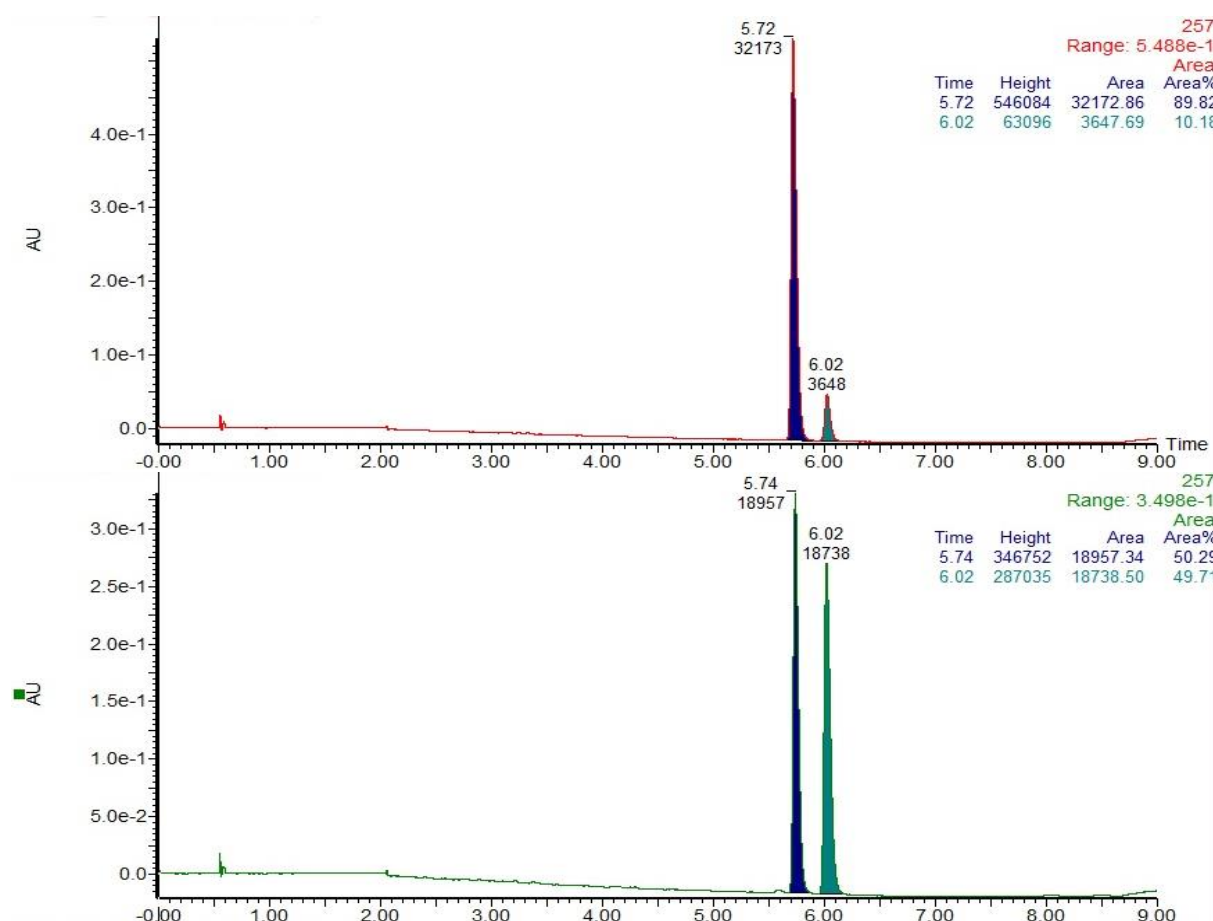

Supplementary Figure 14: UPC<sup>2</sup> traces of **3h**.

### (R)-2-(2-Hydroxyethyl)hept-6-enitrile (**3i**)

Following the general procedure **C** using enal **1i** (750  $\mu$ mol, 93.0 mg), a mixture containing the  $\beta$ -cyanoaldehyde **2i** (73% NMR yield) and the sulfone by-product **2i'** (< 10% NMR yield) was obtained. The crude target product **2i** was reduced according to the general procedure **D** and the desired alcohol was purified by flash column chromatography (silica gel, 15-20% ethyl acetate in hexanes) to afford product **3i** as a pale yellow oil (27.5 mg, 72% yield). The enantiomeric ratio of the corresponding 4-nitrobenzoate derivative was determined to be 92.5:7.5 by UPC<sup>2</sup> analysis on a Daicel Chiralpak IA-3 column (eluent: 100% CO<sub>2</sub> for 1 min, gradient 100% - 60% CO<sub>2</sub> in CH<sub>3</sub>CN for 5 min, 60% CO<sub>2</sub> in CH<sub>3</sub>CN for 2 min, gradient 60% - 100% CO<sub>2</sub> in CH<sub>3</sub>CN for 1 min; flow rate 2.0 mL/min,  $\lambda$  = 256 nm)  $\tau_{Major}$  = 4.20 min,  $\tau_{Minor}$  = 4.60 min.

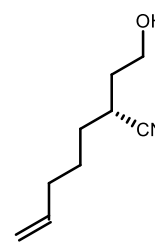

Chemical Formula: C<sub>9</sub>H<sub>15</sub>NO  
Molecular Weight: 153,2250

$[\alpha]_D^{25}$  = -4.9 (c = 1.0, CHCl<sub>3</sub>, 92.5:7.5 e.r.).

<sup>1</sup>H NMR (500 MHz, CDCl<sub>3</sub>):  $\delta$  = 5.78 (ddt,  $J$  = 17.0, 10.2, 6.7 Hz, 1H), 5.06 – 5.00 (m, 1H), 5.00 – 4.96 (m, 1H), 3.89 – 3.72 (m, 2H), 2.88 – 2.75 (m, 1H), 2.18 – 2.03 (m, 2H), 1.86 – 1.80 (m, 2H), 1.71 – 1.50 (m, 4H) ppm. <sup>13</sup>C NMR (126 MHz, CDCl<sub>3</sub>):  $\delta$  = 137.8, 122.1, 115.5, 59.7, 34.9, 33.2, 31.6, 28.1, 26.4 ppm.

HRMS (APCI):  $m/z$  calculated for [C<sub>9</sub>H<sub>16</sub>NO]<sup>+</sup> [M+H]<sup>+</sup>: 154.1226; found: 154.1230.

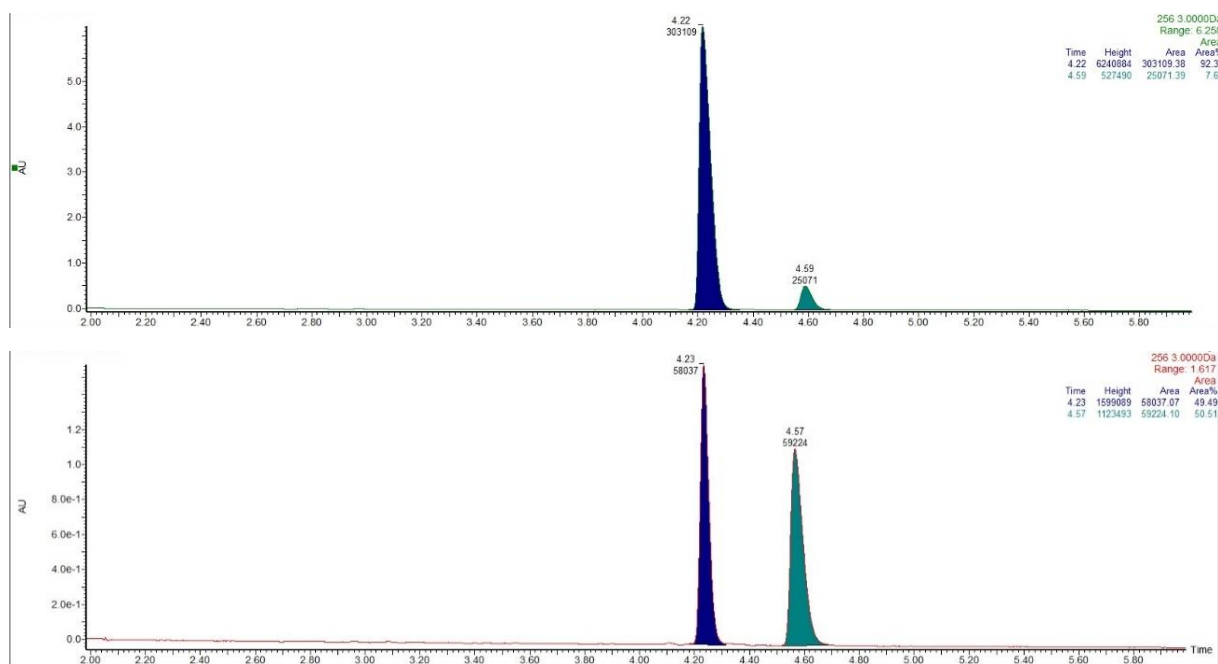

Supplementary Figure 15: UPC<sup>2</sup> traces of **3i**.

### (2*R*,4*S*)-2-(2-Hydroxyethyl)-4,8-dimethylnon-7-enitrile (**3j**)

Following the general procedure **C** using enal **1j** (750  $\mu$ mol, 135 mg), a mixture containing the  $\beta$ -cyanoaldehyde **2j** (80% NMR yield) and the sulfone by-product **2j'** (> 95% NMR yield) was obtained. The crude target product **2j** was reduced according to the general procedure **D** and the desired alcohol was purified by flash column chromatography (silica gel, 15-20% ethyl acetate in hexanes) to afford product **3j** as a pale yellow oil (35.5 mg, 68% yield). Since determination of the d.r. by NMR was not successful due to overlapping signals, the diastereomeric ratio of the corresponding 4-nitrobenzoate derivative was determined to be 90.5:9.5 by UPC<sup>2</sup> analysis on a Daicel Chiralpak ID-3 column (eluent: 100% CO<sub>2</sub> for 1 min, gradient 100% - 60% CO<sub>2</sub> in CH<sub>3</sub>CN for 5 min, 60% CO<sub>2</sub> in CH<sub>3</sub>CN for 2 min, gradient 60% - 100% CO<sub>2</sub> in CH<sub>3</sub>CN for 1 min; flow rate 2.0 mL/min,  $\lambda$  = 257 nm)  $\tau_{Major}$  = 4.95 min,  $\tau_{Minor}$  = 6.05 min.

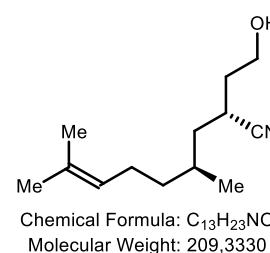

$[\alpha]_D^{25}$  = -4.7 (c = 1.0, CHCl<sub>3</sub>, 90.5:9.5 d.r.).

<sup>1</sup>H NMR (400 MHz, CDCl<sub>3</sub>, major diastereomer):  $\delta$  = 5.12 – 5.05 (m, 1H), 3.83 (dd,  $J$  = 6.6, 5.4 Hz, 2H), 2.96 – 2.82 (m, 1H), 2.07-1.93 (m, 2H), 1.85-1.77 (m, 2H), 1.76 – 1.65 (m, 6H), 1.60 (s, 3H), 1.38 – 1.17 (m, 3H), 0.94 (d,  $J$  = 6.5 Hz, 3H) ppm. <sup>13</sup>C NMR (101 MHz, CDCl<sub>3</sub>, major diastereomer):  $\delta$  = 131.8, 124.3, 122.1, 59.8, 39.6, 37.5, 35.6, 30.8, 26.3, 25.8, 25.5, 18.9, 17.8 ppm.

HRMS (APCI):  $m/z$  calculated for [C<sub>13</sub>H<sub>24</sub>NO]<sup>+</sup> [M+H]<sup>+</sup>: 210.1852; found: 210.1858.

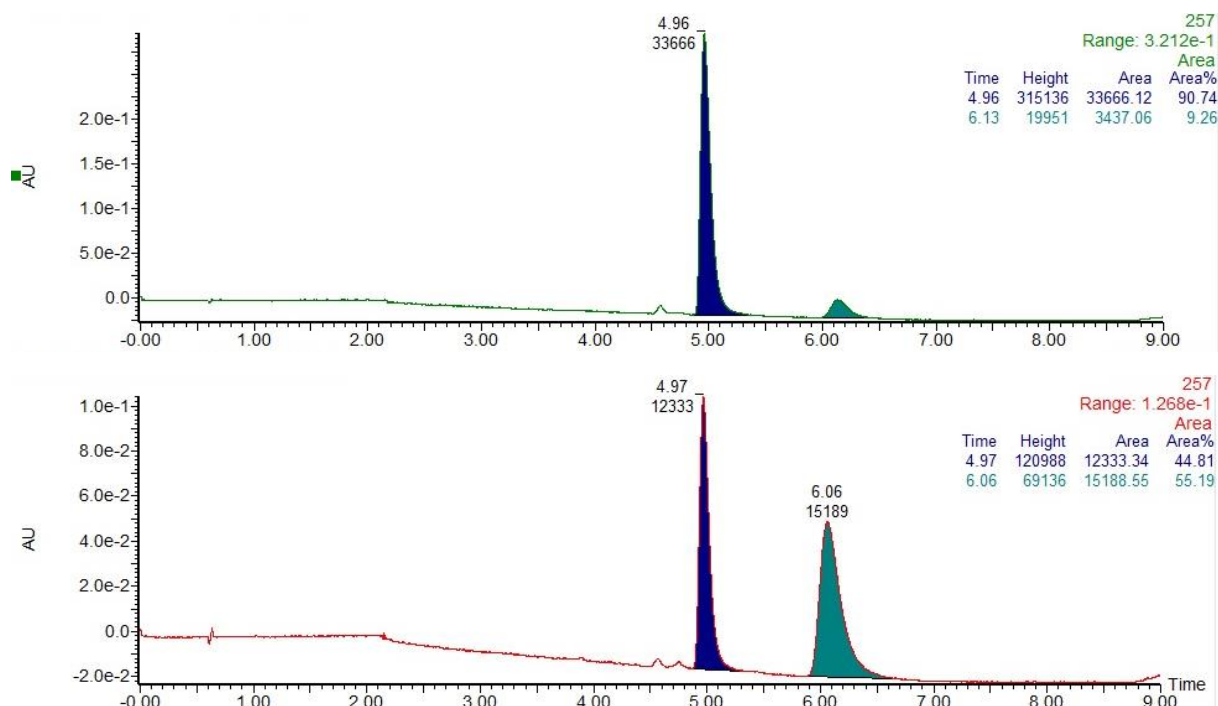

Supplementary Figure 16: UPC<sup>2</sup> traces of **3j**.

### (R)-2-(2-Hydroxyethyl)oct-5-enitrile (**3k**)

Following the general procedure **C** using enal **1k** (750  $\mu$ mol, 104 mg), a mixture containing the  $\beta$ -cyanoaldehyde **2k** (73% NMR yield) and the sulfone by-product **2k'** (32% NMR yield) was obtained. The crude target product **2k** was reduced according to the general procedure **D** and the desired alcohol was purified by flash column chromatography (silica gel, 15-20% ethyl acetate in hexanes) to afford product **3k** as a pale yellow oil (21.0 mg, 69% yield, (Z):(E) = 60:40). The enantiomeric ratio of the corresponding 4-nitrobenzoate derivative was determined to be 91.5:8.5 for both double bond isomers by UPC<sup>2</sup> analysis on a Daicel Chiralpak IE-3 column (eluent: 100% CO<sub>2</sub> for 1 min, gradient 100% - 60% CO<sub>2</sub> in MeOH for 14 min, 60% CO<sub>2</sub> in MeOH for 2 min, gradient 60% - 100% CO<sub>2</sub> in MeOH for 1 min; flow rate 2.0 mL/min,  $\lambda$  = 254 nm) (Z)-isomer:  $\tau_{Major}$  = 11.45 min,  $\tau_{Minor}$  = 12.00 min; (E)-isomer:  $\tau_{Major}$  = 12.25 min,  $\tau_{Minor}$  = 12.50 min.

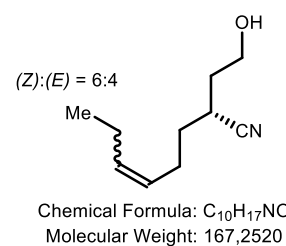

$[\alpha]_D^{25}$  = +6.2 (c = 1.0, CHCl<sub>3</sub>, E:Z = 60:40, 91.5:8.5 e.r.).

<sup>1</sup>H NMR (500 MHz, CDCl<sub>3</sub>, mixture of E/Z-isomers):  $\delta$  = 5.60 – 5.50 (m, 1H, minor), 5.50 – 5.41 (m, 1H, major), 5.35 (td,  $J$  = 7.7, 6.1 Hz, 1H, minor), 5.30 – 5.22 (m, 1H, major), 3.87 – 3.77 (m, 4H, major & minor), 2.88 – 2.78 (m, 2H, major & minor), 2.32 – 1.93 (m, 8H, major & minor), 1.90-1.80 (m, 4H, major & minor), 1.78 – 1.58 (m, 6H, major and minor), 0.97 (t,  $J$  = 7.5, 3H, major), 0.96 (t,  $J$  = 7.5, 3H, minor). <sup>13</sup>C NMR (126 MHz, CDCl<sub>3</sub>, mixture of E/Z-isomers):  $\delta$  = 134.3, 133.9, 126.7, 126.5, 122.1, 122.0, 59.8, 59.8, 34.9, 34.9, 32.3, 32.2, 30.1, 27.7, 27.6, 25.7, 24.8, 20.7, 14.4, 13.9 ppm.

HRMS (APCI): m/z calculated for [C<sub>10</sub>H<sub>18</sub>NO]<sup>+</sup> [M+H]<sup>+</sup>: 168.1383; found: 168.1385.

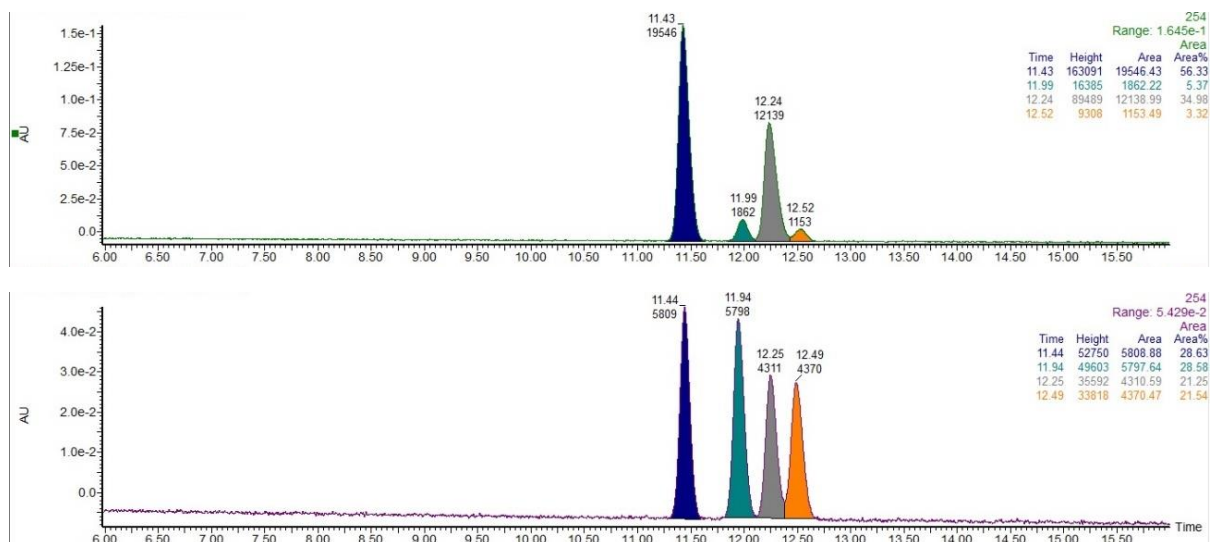

Supplementary Figure 17: UPC<sup>2</sup> traces of **3k**.

### (R)-2-(2-Hydroxyethyl)hept-6-yne nitrile (**3I**)

Following the general procedure **C** using enal **1I** (750  $\mu$ mol, 91.5 mg), a mixture containing the  $\beta$ -cyanoaldehyde **2I** (56% NMR yield) and the sulfone by-product **2I'** (41% NMR yield) was obtained. The crude target product **2I** was reduced according to the general procedure **D** and the desired alcohol was purified by flash column chromatography (silica gel, 15-20% ethyl acetate in hexanes) to afford product **3I** as a pale yellow oil (21.0 mg, 56% yield). The enantiomeric ratio of the corresponding 4-nitrobenzoate derivative was determined to be 90:10 by UPC<sup>2</sup> analysis on a Daicel Chiralpak ID-3 column (eluent: 100% CO<sub>2</sub> for 1 min, gradient 100% - 60% CO<sub>2</sub> in i-PrOH for 5 min, 60% CO<sub>2</sub> in i-PrOH for 2 min, gradient 60% - 100% CO<sub>2</sub> in i-PrOH for 1 min; flow rate 2.0 mL/min,  $\lambda$  = 256 nm)  $\tau_{Major}$  = 4.40 min,  $\tau_{Minor}$  = 4.55 min.

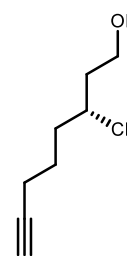

Chemical Formula: C<sub>9</sub>H<sub>13</sub>NO  
Molecular Weight: 151,2090

$[\alpha]_D^{25} = -51.3$  (c = 1.0, CHCl<sub>3</sub>, 90:10 e.r.).

<sup>1</sup>H NMR (400 MHz, CDCl<sub>3</sub>):  $\delta$  = 3.89 – 3.76 (m, 2H), 2.92 – 2.78 (m, 1H), 2.30 – 2.23 (m, 2H), 1.98 (t,  $J$  = 2.7 Hz, 1H), 1.89 – 1.63 (m, 6H) ppm. <sup>13</sup>C NMR (101 MHz, CDCl<sub>3</sub>):  $\delta$  = 121.8, 83.3, 69.4, 59.7, 34.9, 31.2, 27.9, 25.9, 18.1 ppm.

HRMS (APCI):  $m/z$  calculated for [C<sub>9</sub>H<sub>14</sub>NO]<sup>+</sup> [M+H]<sup>+</sup>: 152.1070; found: 152.1069.

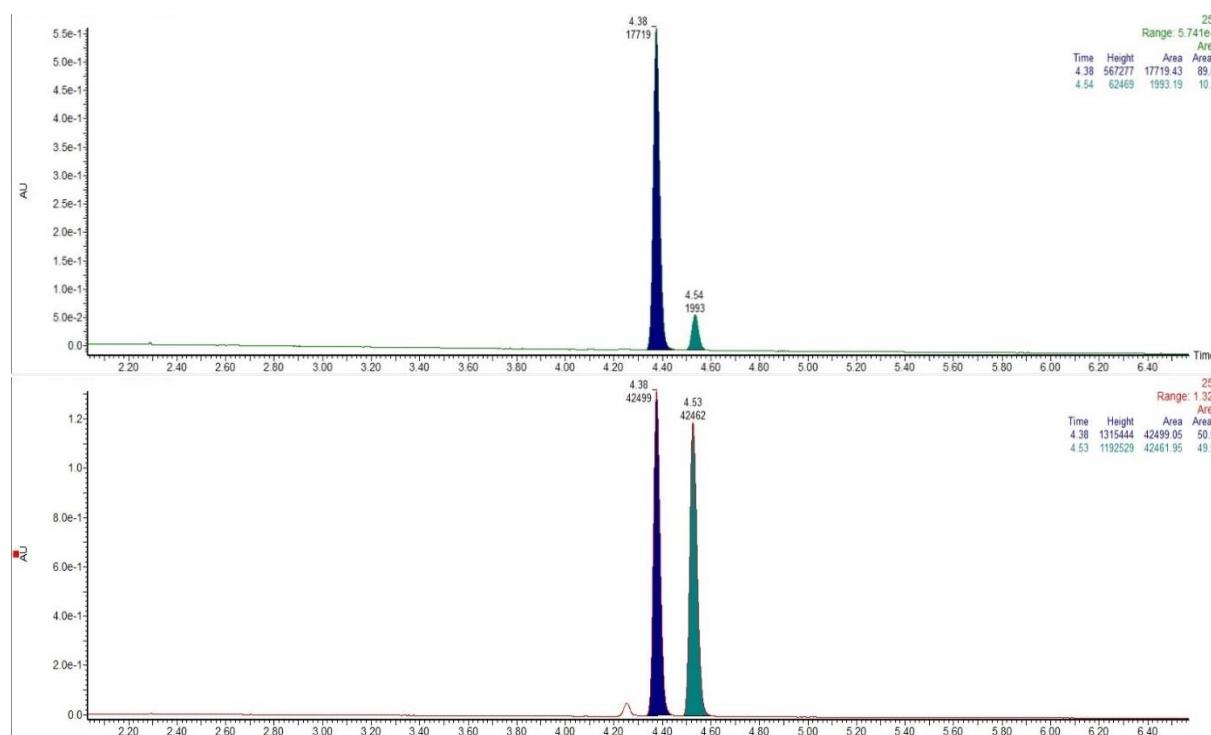

Supplementary Figure 18: UPC<sup>2</sup> traces of **3I**.

**(R)-5-(1,3-Dioxoisindolin-2-yl)-2-(2-oxoethyl)pentanenitrile (2m)**

Following the general procedure C using enal **1m** (750  $\mu$ mol, 182 mg), a mixture containing the  $\beta$ -cyanoaldehyde **2m** (71% NMR yield) and the sulfone by-product **2m'** (78% NMR yield) was obtained. The crude target product **2m** was purified by flash column chromatography (silica gel, 20-30% ethyl acetate in hexanes). Product containing fractions were loaded on a pad of silica gel, kept to open air and eluted after 16 h with ethylacetate. The filtrate was concentrated and purified by preparative TLC (silica gel, 70% ethylacetate in hexanes) to afford the aldehyde product **2m** as a pale-yellow wax (53.5 mg, 79% yield). The enantiomeric ratio of the corresponding dinitrophenylhydrazone derivative (see **Supplementary Figure 4**) was determined to be 88.5:11.5 by UPC<sup>2</sup> analysis on a Daicel Chiralpak OJ-3 column (eluent: 100% CO<sub>2</sub> for 1 min, gradient 100% - 60% CO<sub>2</sub> in i-PrOH for 5 min, 60% CO<sub>2</sub> in i-PrOH for 2 min, gradient 60% - 100% CO<sub>2</sub> in i-PrOH for 1 min; flow rate 2.0 mL/min)  $\lambda$  = 345 nm,  $\tau_{Major}$  = 5.65 min,  $\tau_{Minor}$  = 6.00 min.

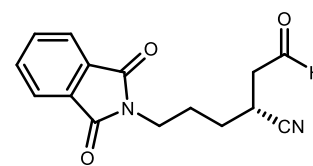

Chemical Formula: C<sub>15</sub>H<sub>14</sub>N<sub>2</sub>O<sub>3</sub>  
Molecular Weight: 270,2880

$[\alpha]_D^{25}$  = +3.3 (c = 1.0, CHCl<sub>3</sub>, 88.5:11.5 e.r.).

<sup>1</sup>H NMR (400 MHz, CDCl<sub>3</sub>):  $\delta$  = 9.74 (s, 1H), 7.84 (dd,  $J$  = 5.5, 3.0 Hz, 2H), 7.72 (dd,  $J$  = 5.4, 3.1 Hz, 2H), 3.74 (t,  $J$  = 6.8 Hz, 2H), 3.22 – 3.12 (m, 1H), 2.90 (ddd,  $J$  = 18.6, 7.0, 0.7 Hz, 1H), 2.74 (ddd,  $J$  = 18.6, 6.4, 0.7 Hz, 1H), 2.03 – 1.90 (m, 1H), 1.90 – 1.79 (m, 1H), 1.76 – 1.58 (m, 2H) ppm. <sup>13</sup>C NMR (101 MHz, CDCl<sub>3</sub>):  $\delta$  = 196.9, 168.5 (2C), 134.2 (2C), 132.1 (2C), 123.5 (2C), 120.6, 45.5, 36.9, 29.2, 26.4, 24.5 ppm.

HRMS (ESI):  $m/z$  calculated for [C<sub>15</sub>H<sub>14</sub>N<sub>2</sub>NaO<sub>3</sub>]<sup>+</sup> [M+Na]<sup>+</sup>: 293.0897; found: 293.0895.

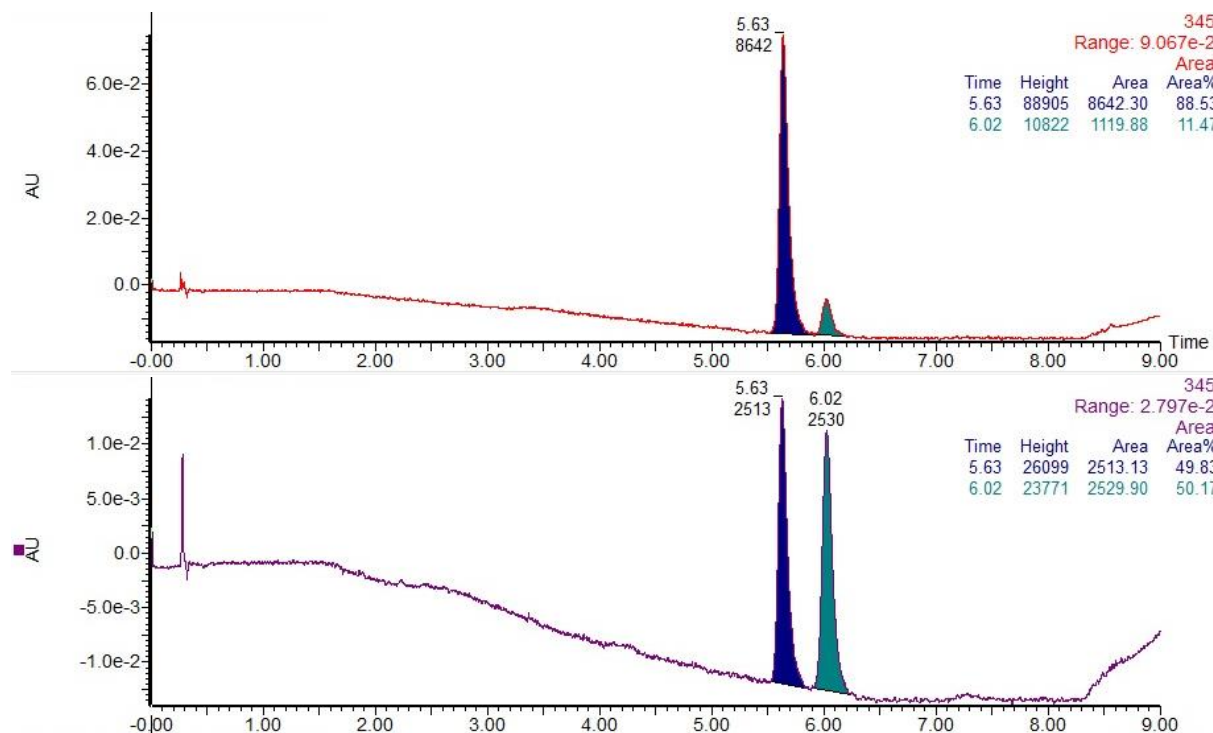

Supplementary Figure 19: UPC<sup>2</sup> traces of **2m**.



### (R)-5-(Benzyloxy)-2-(2-hydroxyethyl)pentanenitrile (**3n**)

Following the general procedure **C** using enal **1n** (750  $\mu\text{mol}$ , 153 mg), a mixture containing the  $\beta$ -cyanoaldehyde **2n** (55% NMR yield) and the sulfone by-product **2n'** (72% NMR yield) was obtained. The crude target product **2n** was reduced according to the general procedure **D** and the desired alcohol was purified by flash column chromatography (silica gel, 15-20% ethyl acetate in hexanes) to afford product **3n** as a pale-yellow oil (30.0 mg, 52% yield). The enantiomeric ratio of the corresponding 4-nitrobenzoate derivative was determined to be 88.5:11.5 by UPC<sup>2</sup> analysis on a Daicel Chiralpak IA-3 column (eluent: 100% CO<sub>2</sub> for 1 min, gradient 100% - 60% CO<sub>2</sub> in CH<sub>3</sub>CN for 5 min, 60% CO<sub>2</sub> in CH<sub>3</sub>CN for 2 min, gradient 60% - 100% CO<sub>2</sub> in CH<sub>3</sub>CN for 1 min; flow rate 2.0 mL/min)  $\lambda = 257 \text{ nm}$ ,  $\tau_{\text{Major}} = 5.50 \text{ min}$ ,  $\tau_{\text{Minor}} = 6.40 \text{ min}$ .

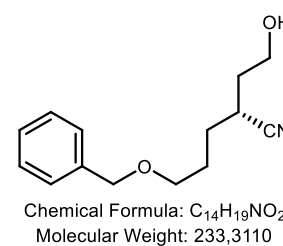

$[\alpha]_{\text{D}}^{25} = +0.1$  ( $c = 1.0$ , CHCl<sub>3</sub>, 88.5:11.5 e.r.).

<sup>1</sup>H NMR (400 MHz, CDCl<sub>3</sub>):  $\delta = 7.40 - 7.23$  (m, 5H), 4.50 (s, 2H), 3.85 - 3.75 (m, 2H), 3.57 - 3.47 (m, 2H), 2.89 - 2.78 (m, 1H), 1.97 - 1.60 (m, 6H), 1.52 (t,  $J = 4.9 \text{ Hz}$ , OH) ppm. <sup>13</sup>C NMR (126 MHz, CDCl<sub>3</sub>):  $\delta = 138.4, 128.6$  (2C), 127.8 (2C), 127.8, 122.1, 73.1, 69.3, 59.7, 34.9, 29.3, 28.0, 27.4 ppm.

HRMS (APCI):  $m/z$  calculated for [C<sub>14</sub>H<sub>20</sub>NO<sub>2</sub>]<sup>+</sup> [M+H]<sup>+</sup>: 234.1489; found: 234.1493.

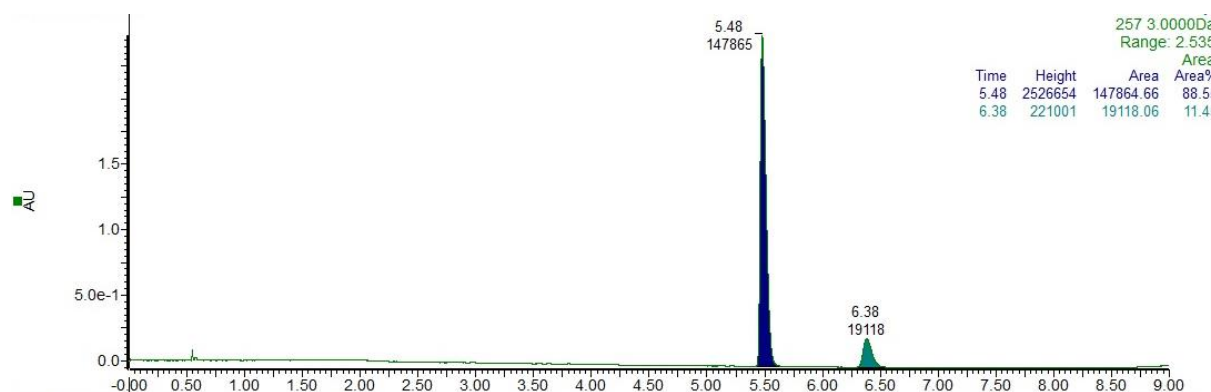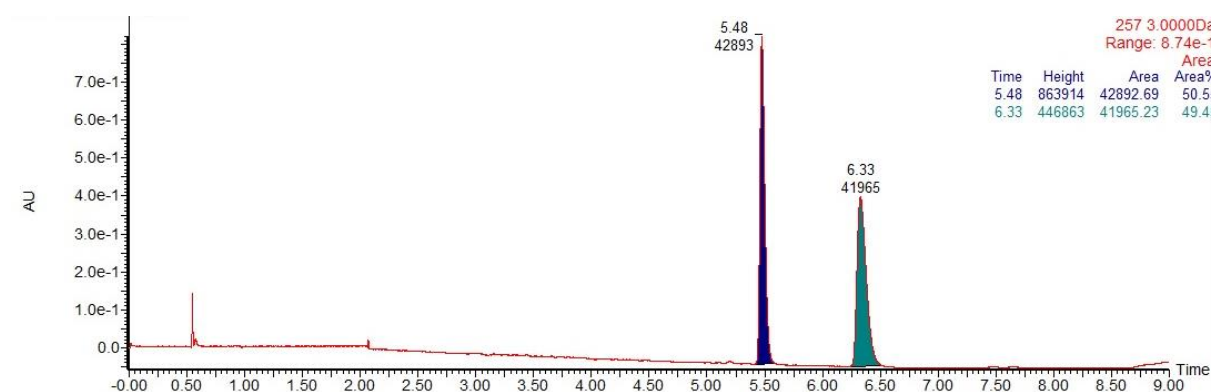

Supplementary Figure 20: UPC<sup>2</sup> traces of **3n**.

### (R)-2-(2-Hydroxyethyl)hexanedinitrile (**3o**)

Following the general procedure **C** using enal **1o** (750  $\mu$ mol, 92.5 mg), a mixture containing the  $\beta$ -cyanoaldehyde **2o** (60% NMR yield) and the sulfone by-product **2o'** (75% NMR yield) was obtained. The crude target product **2o** was reduced according to the general procedure **D** and the desired alcohol was purified by flash column chromatography (silica gel, 40-50% ethyl acetate in hexanes). Product-containing fractions were combined and purified by preparative TLC (silica gel, 100% ethylacetate) to afford product **3o** as a pale yellow oil (17.0 mg, 44% yield). The enantiomeric ratio of the corresponding 4-nitrobenzoate derivative was determined to be 88:12 by UPC<sup>2</sup> analysis on a Daicel Chiralpak ID-3 column (eluent: 100% CO<sub>2</sub> for 1 min, gradient 100% - 60% CO<sub>2</sub> in i-PrOH for 5 min, 60% CO<sub>2</sub> in i-PrOH for 2 min, gradient 60% - 100% CO<sub>2</sub> in i-PrOH for 1 min; flow rate 2.0 mL/min,  $\lambda$  = 256 nm)  $\tau_{Major}$  = 5.35 min,  $\tau_{Minor}$  = 5.60 min.

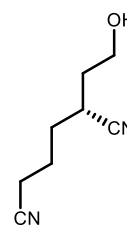

Chemical Formula: C<sub>8</sub>H<sub>12</sub>N<sub>2</sub>O  
Molecular Weight: 152,1970

$[\alpha]_D^{25}$  = -55.8 (c = 0.5, CHCl<sub>3</sub>, 88:12 e.r.).

<sup>1</sup>H NMR (400 MHz, CDCl<sub>3</sub>):  $\delta$  = 3.91 – 3.76 (m, 2H), 2.96 – 2.84 (m, 1H), 2.51 – 2.41 (m, 2H), 1.97 – 1.74 (m, 6H) ppm. <sup>13</sup>C NMR (101 MHz, CDCl<sub>3</sub>):  $\delta$  = 121.3, 118.9, 59.4, 34.7, 31.1, 27.8, 23.2, 17.0 ppm.

HRMS (APCI): m/z calculated for [C<sub>8</sub>H<sub>13</sub>N<sub>2</sub>O]<sup>+</sup> [M+H]<sup>+</sup>: 153.1022; found: 153.1022.

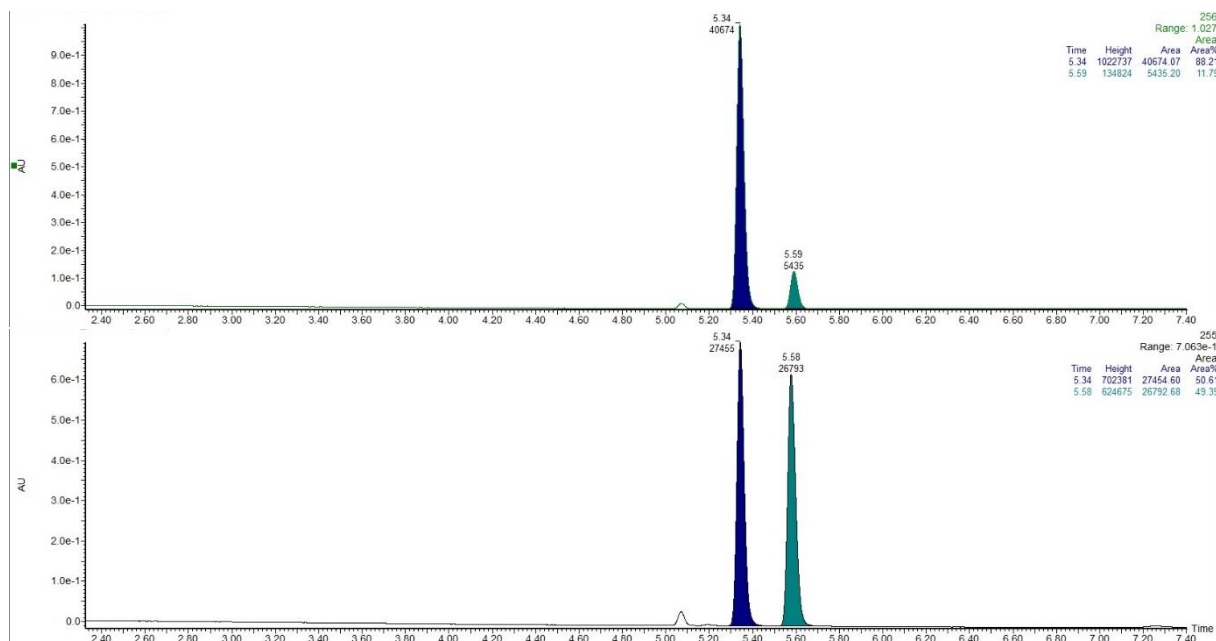

Supplementary Figure 21: UPC<sup>2</sup> traces of **3o**.

### (R)-7-Morpholino-7-oxo-2-(2-oxoethyl)heptanenitrile (2p)

Following the general procedure **C** using enal **1p** (750  $\mu\text{mol}$ , 169 mg), a mixture containing the  $\beta$ -cyanoaldehyde **2p** (64% NMR yield) and the sulfone by-product **2p'** (86% NMR yield) was obtained. The crude target product **2p** was purified by flash column chromatography (silica gel, 1% MeOH in DCM). The product-containing fractions were combined and loaded on another column chromatography (silica gel, 100% ethylacetate). After 16 h, the product was eluted with ethylacetate to afford the aldehyde product **2p** as a pale yellow oil (41.0 mg, 65% yield). The enantiomeric ratio of the corresponding dinitrophenylhydrazone derivative (**Supplementary Figure 4**) was determined to be 86.5:13.5 by UPC<sup>2</sup> analysis on a Daicel Chiralpak IB-3 column (eluent: 100% CO<sub>2</sub> for 1 min, gradient 100% - 70% CO<sub>2</sub> in EtOH for 34 min, 70% CO<sub>2</sub> in EtOH for 2 min, gradient 70% - 100% CO<sub>2</sub> in EtOH for 1 min; flow rate 2.0 mL/min,  $\lambda = 345 \text{ nm}$ )  $\tau_{\text{Major}} = 27.70 \text{ min}$ ,  $\tau_{\text{Minor}} = 28.05 \text{ min}$ .

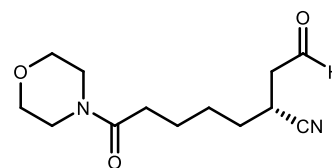

Chemical Formula: C<sub>13</sub>H<sub>20</sub>N<sub>2</sub>O<sub>3</sub>  
Molecular Weight: 252.3140

$[\alpha]_{\text{D}}^{25} = +2.4$  (c = 1.0, CHCl<sub>3</sub>, 86.5:13.5 e.r.).

<sup>1</sup>H NMR (400 MHz, CDCl<sub>3</sub>):  $\delta = 9.75$  (s, 1H), 3.70 – 3.63 (m, 4H), 3.63 – 3.57 (m, 2H), 3.45 (t,  $J = 4.9 \text{ Hz}$ , 2H), 3.14 – 3.04 (m, 1H), 2.90 (ddd,  $J = 18.6, 6.9, 0.7 \text{ Hz}$ , 1H), 2.75 (ddd,  $J = 18.6, 6.5, 0.7 \text{ Hz}$ , 1H), 2.33 (t,  $J = 7.2 \text{ Hz}$ , 2H), 1.76 – 1.45 (m, 6H) ppm. <sup>13</sup>C NMR (101 MHz, CDCl<sub>3</sub>):  $\delta = 197.2, 171.1, 121.0, 67.0, 66.7, 46.0, 45.6, 42.1, 32.6, 31.7, 26.9, 24.7, 24.4$  ppm.

HRMS (ESI): m/z calculated for [C<sub>13</sub>H<sub>20</sub>N<sub>2</sub>NaO<sub>3</sub>]<sup>+</sup> [M+Na]<sup>+</sup>: 275.1366; found: 275.1365.

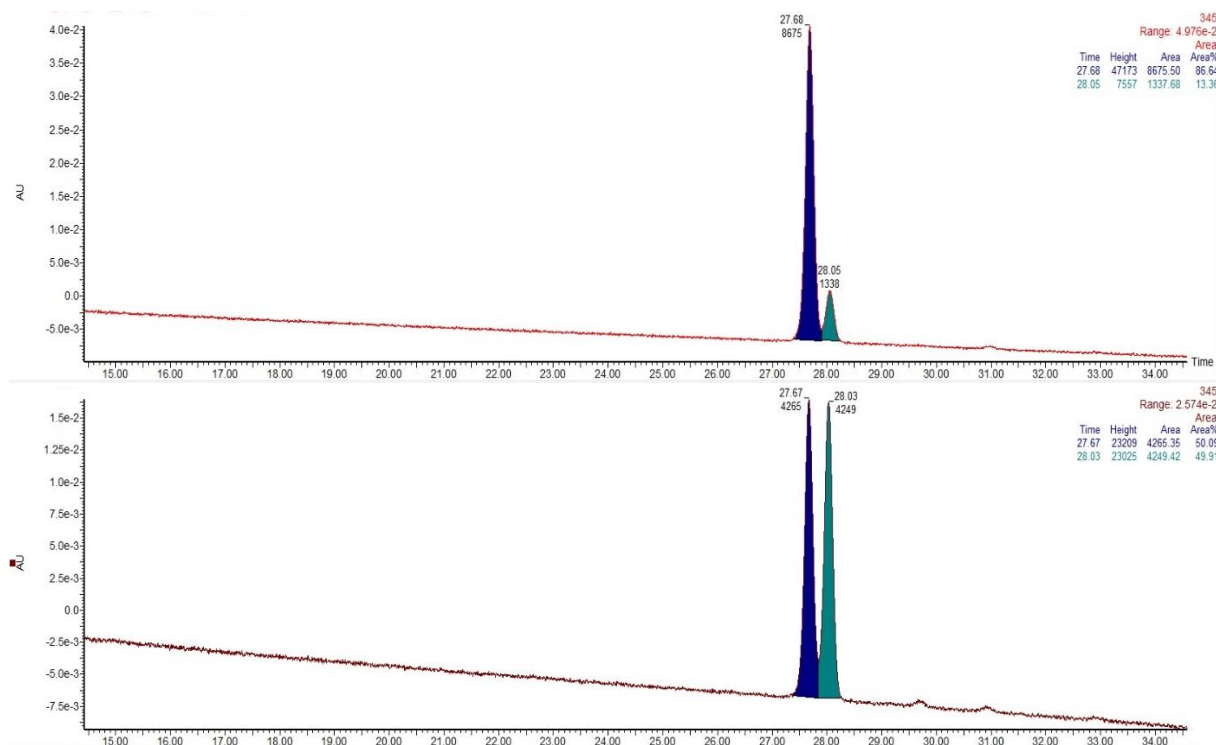

Supplementary Figure 22: UPC<sup>2</sup> traces of **2p**.

### (R)-11-Hydroxy-2-(2-oxoethyl)undecanenitrile (**2q**)

Following the general procedure **C** using enal **1q** (750  $\mu$ mol, 149 mg), a mixture containing the  $\beta$ -cyanoaldehyde **2q** (47% NMR yield) and the sulfone by-product **2q'** (75% NMR yield) was obtained. The crude target product **2q** was loaded on column chromatography (silica gel, 20% ethyl acetate in hexanes). After 3 days, the product was eluted (20-30% ethylacetate in hexanes). Product-containing fractions were combined, concentrated and purification by chromatography was repeated as described above to afford the aldehyde product **2q** as a pale yellow oil (25.5 mg, 46% yield). The enantiomeric ratio of the corresponding dinitrophenylhydrazone derivative (**Supplementary Figure 4**) was determined to be 90.5:9.5 by UPC<sup>2</sup> analysis on a Daicel Chiralpak IE-3 column (eluent: 100% CO<sub>2</sub> for 1 min, gradient 100% - 60% CO<sub>2</sub> in EtOH for 5 min, 60% CO<sub>2</sub> in EtOH for 10 min, gradient 60% - 100% CO<sub>2</sub> in EtOH for 1 min; flow rate 2.0 mL/min,  $\lambda$  = 345 nm)  $\tau_{Major}$  = 10.55 min,  $\tau_{Minor}$  = 11.45 min. Note: This compound was found unstable and decomposed upon storage at -20 °C for several months.

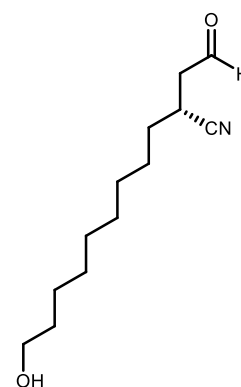

Chemical Formula: C<sub>13</sub>H<sub>23</sub>NO<sub>2</sub>  
Molecular Weight: 225.3320

$[\alpha]_D^{25}$  = -32.4 (c = 0.5, CHCl<sub>3</sub>, 90.5:9.5 e.r.).

<sup>1</sup>H NMR (400 MHz, CDCl<sub>3</sub>):  $\delta$  = 9.77 (s, 1H), 3.63 (t,  $J$  = 6.6 Hz, 2H), 3.13 – 3.02 (m, 1H), 2.90 (dd,  $J$  = 18.5, 6.9 Hz, 1H), 2.73 (dd,  $J$  = 18.5, 6.5 Hz, 1H), 1.67 – 1.19 (m, 17H). <sup>13</sup>C NMR (101 MHz, CDCl<sub>3</sub>):  $\delta$  = 197.3, 121.2, 63.2, 45.7, 32.9, 31.9, 29.5, 29.4, 29.3, 29.0, 27.1, 25.8, 24.9 ppm.

HRMS (ESI):  $m/z$  calculated for [C<sub>13</sub>H<sub>23</sub>NNaO<sub>2</sub>]<sup>+</sup> [M+Na]<sup>+</sup>: 248.1621; found: 248.1624.

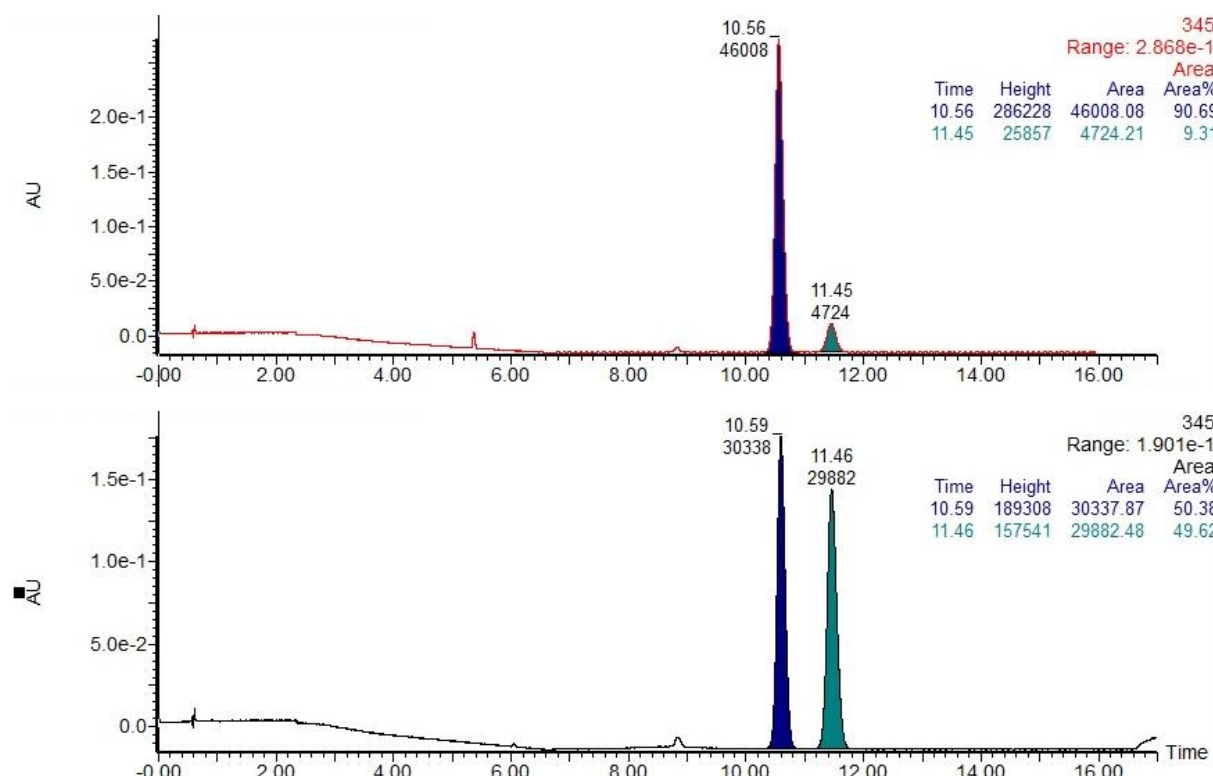

Supplementary Figure 23: UPC<sup>2</sup> traces of **2q**.

**(2*R*,5*R*)-5-((5*R*,8*R*,9*S*,10*S*,13*R*,14*S*,17*R*)-10,13-Dimethyl-3,12-dioxohexadecahydro-1*H*-cyclopenta[*a*]phenanthren-17-yl)-2-(2-oxoethyl)hexanenitrile (2*r*)**

Tosyl cyanide (1.0 equiv., 19.0 mg, 100  $\mu$ mol, 95%), **2r** (2.0 equiv., 79.5 mg, 200  $\mu$ mol), dihydropyridine **R-1** (1.2 eq, 39.0 mg, 120  $\mu$ mol), aminocatalyst **A-4** (0.3 equiv., 31.1 mg, 30.0  $\mu$ mol) and 4-CzIPN (1 mol%, 790  $\mu$ g, 1.00  $\mu$ mol) were loaded in a reaction vial and the vessel was sealed with a septum and flushed with argon. Then, ethylacetate (200  $\mu$ L), water (3.0 equiv., 5.41  $\mu$ L) and TFA (0.4 equiv., 2.97  $\mu$ L, 40.0  $\mu$ mol) was added and the vial was immediately placed in a cooling block (set to 5  $^{\circ}$ C internal temperature) and irradiated with 460 nm (90 mW/cm<sup>2</sup>) for 16 hours. The crude mixture, containing  $\beta$ -cyanoaldehyde **2r** (44% NMRy) and sulfone by-product **2r'** (83% NMRy) was concentrated and loaded on column chromatography (silica gel, 15% ethyl acetate in hexanes). After 16 h being absorbed on the silica gel (in order to decompose unstable and inseparable sulfone by-product **2r'**), the product was eluted (15-30% ethylacetate in hexanes). The product-containing fractions were combined, concentrated and column chromatography was repeated as described above to afford the aldehyde product **2r** as a white solid (42.5 mg, 42% yield). Although no minor diastereoisomer could be observed by NMR analysis, we conducted chiral chromatographic analysis of the the corresponding dinitrophenylhydrazone derivative to reveal a d.r. of 90:10 by UPC<sup>2</sup> analysis on a Daicel Chiralpak ID-3 column (eluent: 100% CO<sub>2</sub> for 1 min, gradient 100% - 60% CO<sub>2</sub> in MeOH for 5 min, 60% CO<sub>2</sub> in MeOH for 2 min, gradient 60% - 100% CO<sub>2</sub> in MeOH for 1 min; flow rate 2.0 mL/min,  $\lambda$  = 343 nm)  $\tau_{Major}$  = 6.00 min,  $\tau_{Minor}$  = 4.95 min.

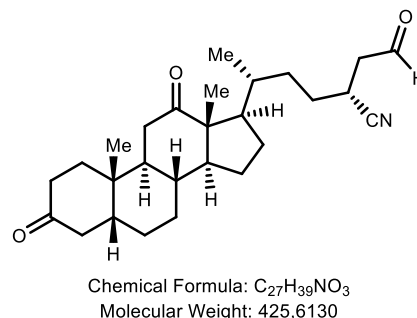

$[\alpha]_D^{25}$  = +56.1 (c = 0.5, CHCl<sub>3</sub>, 90:10 d.r.).

**<sup>1</sup>H NMR (400 MHz, CDCl<sub>3</sub>, major diastereoisomer):**  $\delta$  = 9.77 (s, 1H), 3.13 – 3.01 (m, 1H), 2.92 (ddd,  $J$  = 18.6, 6.9, 0.7 Hz, 1H), 2.74 (ddd,  $J$  = 18.6, 6.6, 0.8 Hz, 1H), 2.67 – 2.52 (m, 2H), 2.34 (td,  $J$  = 14.6, 5.3 Hz, 1H), 2.23 – 2.14 (m, 1H), 2.13-1.27 (m, 21H), 1.19-1.07 (m, 1H), 1.11 (s, 3H), 1.06 (s, 3H), 0.86 (d,  $J$  = 7.3 Hz, 3H) ppm. **<sup>13</sup>C NMR (101 MHz, CDCl<sub>3</sub>, major diastereoisomer):**  $\delta$  = 214.3, 212.2, 197.3, 121.1, 58.7, 57.7, 46.4, 45.9, 44.4, 43.8, 42.3, 38.5, 37.1, 36.9, 35.8, 35.6, 35.3, 32.6, 28.7, 27.7, 26.7, 25.6, 24.9, 24.4, 22.3, 18.8, 11.9. ppm.

**HRMS (ESI):** m/z calculated for [C<sub>28</sub>H<sub>43</sub>NNaO<sub>4</sub>]<sup>+</sup> [M+MeOH+Na]<sup>+</sup>: 480.3084; found: 480.3093.

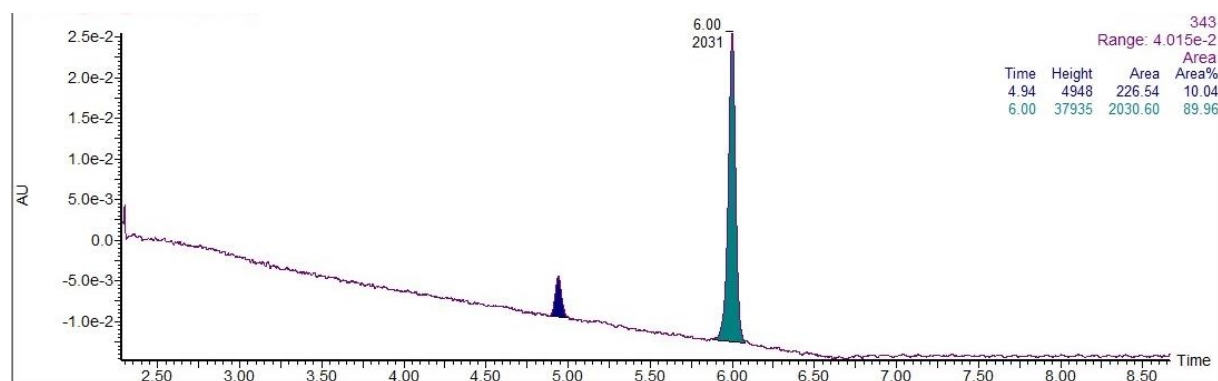

Supplementary Figure 24: UPC<sup>2</sup> trace of **2r** (diastereoisomer).

## Further Derivatization of Cyanoaldehyde 2a

### (4R)-2-Hydroxy-4-pentylpentanedinitrile (4a)

Following the general procedure C using enal 1a (750  $\mu\text{mol}$ , 94.5 mg), the crude mixture containing cyanoaldehyde 2a was used without purification (evaporation of the solvent, *one-pot approach*). A solution of  $\text{NaHSO}_3$  (104 mg, 1.00 mmol, 4.0 equiv.) in water (0.5 mL) was added to the crude product and the mixture was cooled to 0  $^\circ\text{C}$ . Then, a solution of KCN (130 mg, 2.00 mmol, 8.0 equiv.) in water (1.0 mL) was added dropwise and stirred for 10 minutes at 0  $^\circ\text{C}$ . DCM (1.5 mL) was added and the mixture was stirred vigorously at room temperature under open air. The mixture was transferred to a separation funnel and extracted with DCM (3 x 20 mL). The combined layers were dried with  $\text{MgSO}_4$  and concentrated. Column chromatography (silica gel, 5–8% ethyl acetate in hexanes) afforded 31.0 mg (69% yield over 2 steps) of cyanohydrine 4a as a diastereomeric mixture of 66:34. The enantiomeric ratios of the corresponding 4-nitrobenzoate derivatives were determined to be 90:10 (for both diastereoisomers) by UPC<sup>2</sup> analysis on a Daicel Chiralpak IA-3 column (eluent: 100%  $\text{CO}_2$  for 1 min, gradient 100% - 60%  $\text{CO}_2$  in MeOH for 5 min, 60%  $\text{CO}_2$  in MeOH for 2 min, gradient 60% - 100%  $\text{CO}_2$  in MeOH for 1 min; flow rate 2.0 mL/min,  $\lambda = 254$  nm) Major diastereoisomer:  $\tau_{\text{Major}} = 4.80$  min,  $\tau_{\text{Minor}} = 4.35$  min, Minor diastereoisomer:  $\tau_{\text{Major}} = 4.50$  min,  $\tau_{\text{Minor}} = 5.20$  min. Racemic material could be obtained as diastereopure samples (see UPC<sup>2</sup> traces below).

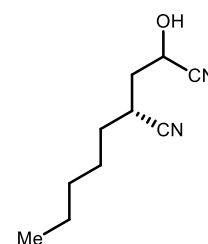

Chemical Formula:  $\text{C}_{10}\text{H}_{16}\text{N}_2\text{O}$   
Molecular Weight: 180.2510

$[\alpha]_{\text{D}}^{25} = -143.2$  ( $c = 0.5$ ,  $\text{CHCl}_3$ , 66:34 d.r., 90:10 e.r.).

**$^1\text{H}$  NMR (400 MHz,  $\text{CDCl}_3$ , mixture of diastereoisomers):**  $\delta = 4.78 - 4.64$  (m, 2H, major & minor), 3.24 – 2.98 (br m, 2 OH, major & minor), 2.93 (ddt,  $J = 10.3, 8.9, 5.4$  Hz, 1H, major), 2.86 – 2.70 (m, 1H, minor), 2.29 – 2.04 (m, 4H, major & minor), 1.75 – 1.28 (m, 16H, major & minor), 0.91 (t,  $J = 6.9$  Hz, 6H, major & minor).  **$^{13}\text{C}$  NMR (101 MHz,  $\text{CDCl}_3$ , mixture of diastereoisomers):**  $\delta = 120.8$  (2C), 119.0, 118.8, 59.5, 58.5, 37.4, 37.4, 32.1, 32.1, 31.2 (2C), 27.9, 27.7, 26.8, 26.7, 22.5 (2C), 14.0 (2C) ppm.

**HRMS (APCI):**  $m/z$  calculated for  $[\text{C}_{10}\text{H}_{17}\text{N}_2\text{O}]^+ [\text{M}+\text{H}]^+$ : 181.1335; found: 181.1331.

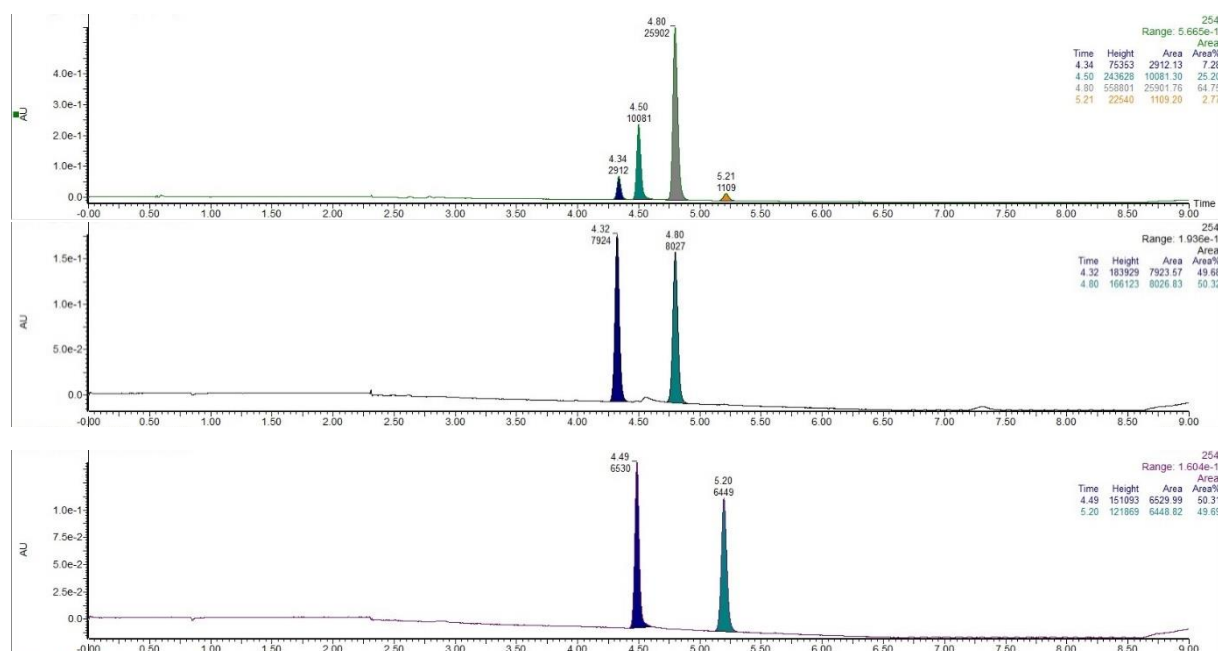

Supplementary Figure 25: UPC<sup>2</sup> traces of 4a.

### (R)-3-Cyanoctanoic acid (4b)

Following the general procedure **C** using enal **1a** (750  $\mu\text{mol}$ , 94.5 mg), the crude mixture containing cyanoaldehyde **2a** was used without purification (evaporation of the solvent, *one-pot approach*). The crude mixture was redissolved in t-BuOH (8.0 mL) and 2-methylbut-1-ene (808  $\mu\text{L}$ , 7.50 mmol, 30 equiv.) was added. Then, a solution of NaClO<sub>2</sub> (271 mg, 3.00 mmol, 12 equiv.) and NaH<sub>2</sub>PO<sub>4</sub> (300 mg, 2.50 mmol, 10 equiv.) in water (3.0 mL) was added dropwise and the mixture was stirred for 2 hours at room temperature. The mixture was diluted with water (30 mL), acidified to pH = 3 by use of aqueous HCl (1.0 M) and extracted with DCM (3 x 30 mL). The combined organic layers were dried with MgSO<sub>4</sub>, concentrated and the product was purified by column chromatography (silica gel, 8-15% EtOAc in hexanes with 1% AcOH). The pyridine containing product was again separated by column chromatography (silica gel, 10-15% EtOAc in hexanes for elution of pyridine followed by 1% AcOH in EtOAc for elution of product) to obtain 26.0 mg (62%) of the desired cyanoacid **4b** as bright yellow oil. NMR data was found to be in agreement with the literature.<sup>28</sup>

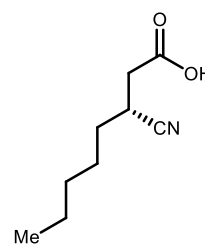

Chemical Formula: C<sub>9</sub>H<sub>15</sub>NO<sub>2</sub>  
Molecular Weight: 169,2240

<sup>1</sup>H NMR (400 MHz, CDCl<sub>3</sub>)  $\delta$  = 3.06 – 2.94 (m, 1H), 2.77 (dd,  $J$  = 17.1, 7.7 Hz, 1H), 2.62 (dd,  $J$  = 17.1, 6.6 Hz, 1H), 1.73 – 1.21 (m, 8H), 0.91 (t,  $J$  = 6.8 Hz, 3H) ppm.

### (R)-3-(Aminomethyl)octanoic acid (**4c**)

Cyanoacid **4b** (26.1 mg, 154  $\mu\text{mol}$ ) was dissolved in MeOH (100 mL, HPLC grade) and the solution was subjected to hydrogenation using a H-Cube pro apparatus (conditions: new Pd/C cartridge, 70 °C, 50 bar H<sub>2</sub>, 1.0 mL/min). The apparatus was flushed with MeOH (3 x 20 mL) and the combined fractions were concentrated to afford 24.5 mg (91%) of aminoacid **4c** as off-white semi-solid without need for further purification.

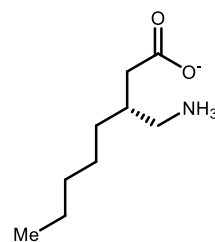

Chemical Formula: C<sub>9</sub>H<sub>19</sub>NO<sub>2</sub>  
Molecular Weight: 173,2560

Determination of e.r.: 1.00 mg of **4c** was dissolved in MeOH (1 mL) and TMS-diazomethane (2M in diethylether, 0.3 mL) was added. After 5 minutes, the mixture was dried under reduced pressure, and the methylester was re-dissolved in CHCl<sub>3</sub> (0.2 mL) and 4-NO<sub>2</sub>-benzoyl chloride (5.0 equiv.) and DMAP (5.0 equiv.) were added. After stirring for 1 h, the amide was isolated by preparative TLC (20% EtOAc in hexanes) and the enantiomeric ratio was determined to be 90.5:9.5 by UPC<sup>2</sup> analysis on a Daicel Chiralpak ID-3 column (eluent: 100% CO<sub>2</sub> for 1 min, gradient 100% - 60% CO<sub>2</sub> in CH<sub>3</sub>CN for 5 min, 60% CO<sub>2</sub> in CH<sub>3</sub>CN for 2 min, gradient 60% - 100% CO<sub>2</sub> in CH<sub>3</sub>CN for 1 min; flow rate 2.0 mL/min,  $\lambda$  = 262 nm,  $\tau_{\text{Major}}$  = 5.15 min,  $\tau_{\text{Minor}}$  = 5.40 min).

$[\alpha]_{\text{D}}^{25}$  = -97.6 (c = 0.5, MeOH, 90.5:9.5 e.r.).

<sup>1</sup>H NMR (400 MHz, CD<sub>3</sub>OD)  $\delta$  = 2.98 (dd,  $J$  = 12.8, 4.7 Hz, 1H), 2.90 (dd,  $J$  = 12.8, 7.5 Hz, 1H), 2.45 (dd,  $J$  = 16.0, 4.4 Hz, 1H), 2.33 (dd,  $J$  = 16.0, 8.0 Hz, 1H), 2.08 – 1.98 (m, 1H), 1.43 – 1.26 (m, 8H), 0.92 (t,  $J$  = 6.8 Hz, 3H). <sup>13</sup>C NMR (101 MHz, CD<sub>3</sub>OD)  $\delta$  = 179.0, 45.1, 41.0, 35.3, 33.4, 33.0, 27.4, 23.6, 14.4 ppm.

HRMS (ESI):  $m/z$  calculated for [C<sub>9</sub>H<sub>20</sub>NO<sub>2</sub>]<sup>+</sup> [M+H]<sup>+</sup>: 174.1489; found: 174.1496.

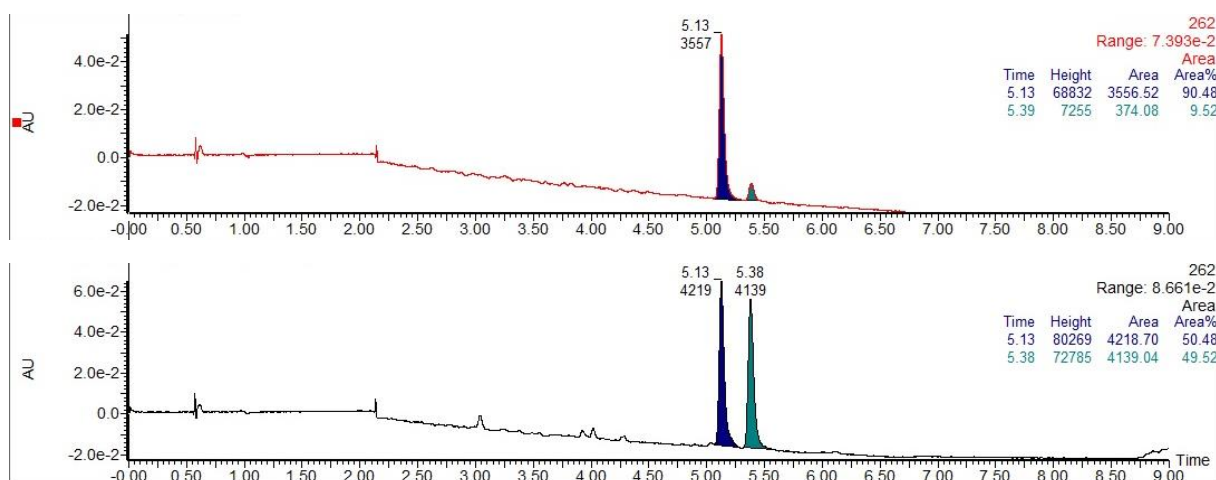

Supplementary Figure 26: UPC<sup>2</sup> traces of **4c**.



## Characterization of the $\beta$ -Sulfone Aldehyde **2a'** (byproduct)

Due to the inseparability of the aldehydic reaction products **2a** and **2a'**, a clean mixture was obtained upon reduction to alcohols **3** and column chromatography purification, as described below.

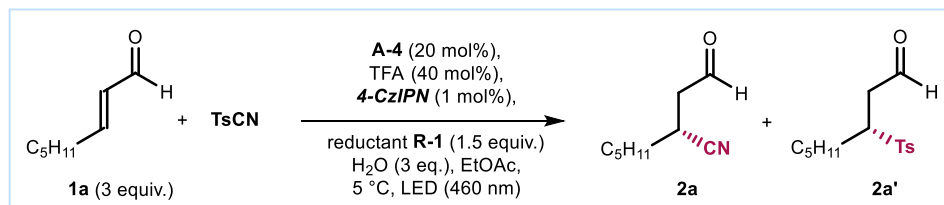

Following the general procedure **C** using enal **1a** (750  $\mu$ mol, 94.5 mg), the crude product was purified by flash column chromatography (silica gel, CHCl<sub>3</sub>) to afford 38.0 mg of an inseparable mixture of **2a** and **2a'** (and traces of pyridine byproduct). Isolated peaks in <sup>1</sup>H NMR are as following:

Characteristic peaks of **2a**:

<sup>1</sup>H NMR (400 MHz, CDCl<sub>3</sub>)  $\delta$  = 9.74 (bs, 1H), 3.08 – 3.01 (m, 1H), 2.87 (ddd,  $J$  = 18.5, 7.1, 0.7 Hz, 1H), 2.71 (ddd,  $J$  = 18.6, 6.4, 0.8 Hz, 1H), 0.87 (t,  $J$  = 7.0 Hz, 3H), ppm.

Characteristic peaks of **2a'**:

<sup>1</sup>H NMR (400 MHz, CDCl<sub>3</sub>)  $\delta$  = 9.70 (t,  $J$  = 1.2 Hz, 1H), 7.72 (d,  $J$  = 8.3 Hz, 2H), 7.34 (d,  $J$  = 8.0 Hz, 2H), 3.66-3.57 (m, 1H), 3.00 (ddd,  $J$  = 18.3, 5.9, 1.4 Hz, 1H), 2.61 (ddd,  $J$  = 18.3, 6.1, 0.9 Hz, 1H), 2.43 (s, 3H), 0.80 (t,  $J$  = 6.7 Hz, 3H) ppm.

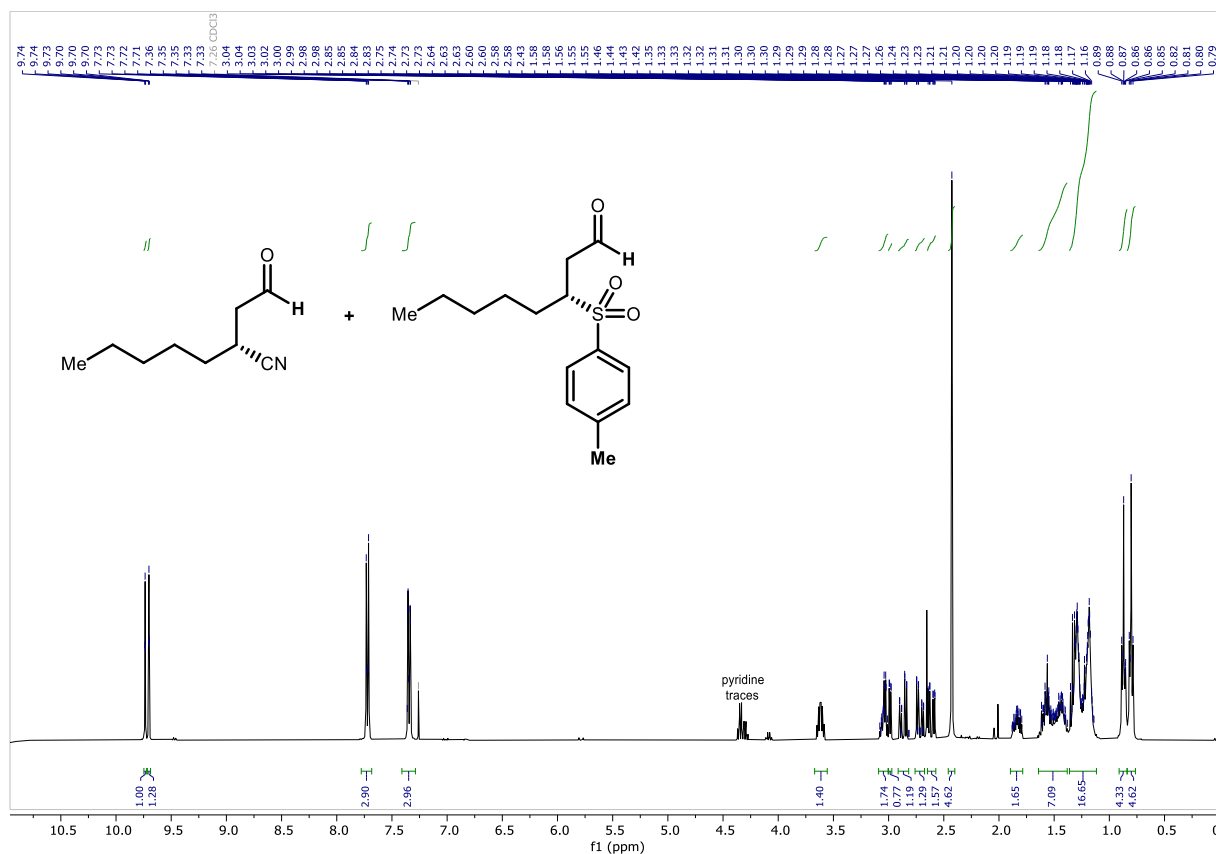

Supplementary Figure 27: Mixture of  $\beta$ -cyano aldehyde **2a** and  $\beta$ -sulfone aldehyde **2a'** (400 MHz).

Upon reduction of the crude mixture obtained with enal **1a**, the alcohol derivatives of **2a** and **2a'** could be separated readily by column chromatography. This allowed us to isolate and characterise the sulfonyl-alcohol by-product **3a'**:

**3-Tosyloctan-1-ol (3a')**. A 8.0 mL vial equipped with a stirring bar was charged with tosyl cyanide (19.1 mg, 100  $\mu$ mol, 95% purity, 1.0 equiv.), **A-3** (14.0 mg, 20.0  $\mu$ mol, 0.2 equiv.), **R-1** (49.0 mg, 150  $\mu$ mol, 1.5 equiv.), 4-CzIPN (1.00 mg, 1.00  $\mu$ mol, 1 mol%) and octenal **1a** (44.8  $\mu$ L, 300  $\mu$ mol, 3.0 equiv.). The vial was sealed with a septum and purged with Argon. The reactants were suspended in EtOAc (200  $\mu$ L, ensure that all compounds are suspended) and deionized water (5.4  $\mu$ L, 3.0 equiv.)

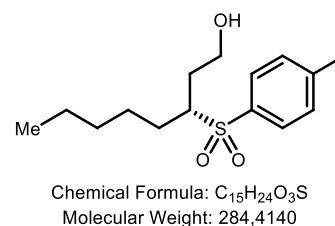

was added. Then, TFA (2.23  $\mu$ L, 30  $\mu$ mol, 0.3 equiv.) was added and the vial was instantly placed in a pre-cooled metal block (set for an internal temperature of -10 °C) and irradiated with a high-power single LED (460 nm, irradiance 90 mW/cm<sup>2</sup>). After 16 hours the mixture was concentrated under reduced pressure. The residue was dissolved in THF (0.40 mL) and then water (0.10 mL) was added. After cooling to 0 °C with an ice bath, NaBH<sub>4</sub> (37.8 mg, 1.00 mmol, 10 equiv.) was added in a few portions while rigorous stirring. After 10 minutes, the ice bath was removed and the mixture was stirred for 90 minutes at ambient temperature. After cooling to 0 °C with an ice bath, the slurry was quenched dropwise with 1 N HCl until gas evolution ceased. The mixture was transferred to a separation funnel and extracted with DCM (3 x 20 mL). The desired alcohol were purified by flash column chromatography (silica gel, 15-20% ethyl acetate in hexanes) to afford 20.0 mg (70%) of sulfone alcohol **3a'** as a pale-yellow oil. The enantiomeric ratio of the corresponding 4-nitrobenzoate (prepared in analogy to the general procedure for derivatization of  $\beta$ -cyanoalcohols) was determined to be 86:14 by UPC<sup>2</sup> analysis on a Daicel Chiralpak IE-3 column (eluent: 100% CO<sub>2</sub> for 1 min, gradient 100% - 60% CO<sub>2</sub> in CH<sub>3</sub>CN for 5 min, 60% CO<sub>2</sub> in CH<sub>3</sub>CN for 2 min, gradient 60% - 100% CO<sub>2</sub> in CH<sub>3</sub>CN for 1 min; flow rate 2.0 mL/min,  $\lambda$  = 224 nm)  $\tau_{Major}$  = 6.20 min,  $\tau_{Minor}$  = 6.40 min.

$[\alpha]_D^{25}$  = -3.2 (c = 1.0, CHCl<sub>3</sub>, 86:14 e.r.).

<sup>1</sup>H NMR (400 MHz, CDCl<sub>3</sub>)  $\delta$  = 7.76 (d, *J* = 8.2 Hz, 2H), 7.36 (d, *J* = 8.1 Hz, 2H), 3.90 – 3.80 (m, 1H), 3.75 – 3.65 (m, 1H), 3.19 – 3.08 (m, 1H), 2.45 (s, 3H), 2.15 – 2.02 (m, 2H), 1.92 – 1.73 (m, 2H), 1.54 – 1.35 (m, 2H), 1.32 – 1.13 (m, 4H), 0.83 (t, *J* = 6.9 Hz, 3H) ppm. <sup>13</sup>C NMR (126 MHz, CDCl<sub>3</sub>)  $\delta$  = 144.8, 134.7 (2C), 129.9 (2C), 129.1, 62.0, 60.0, 31.6, 31.0, 28.7, 26.4, 22.4, 21.8, 14.0 ppm.

HRMS (ESI): *m/z* calculated for [C<sub>15</sub>H<sub>25</sub>O<sub>3</sub>S]<sup>+</sup> [M+H]<sup>+</sup>: 285.1519; found: 285.1523.

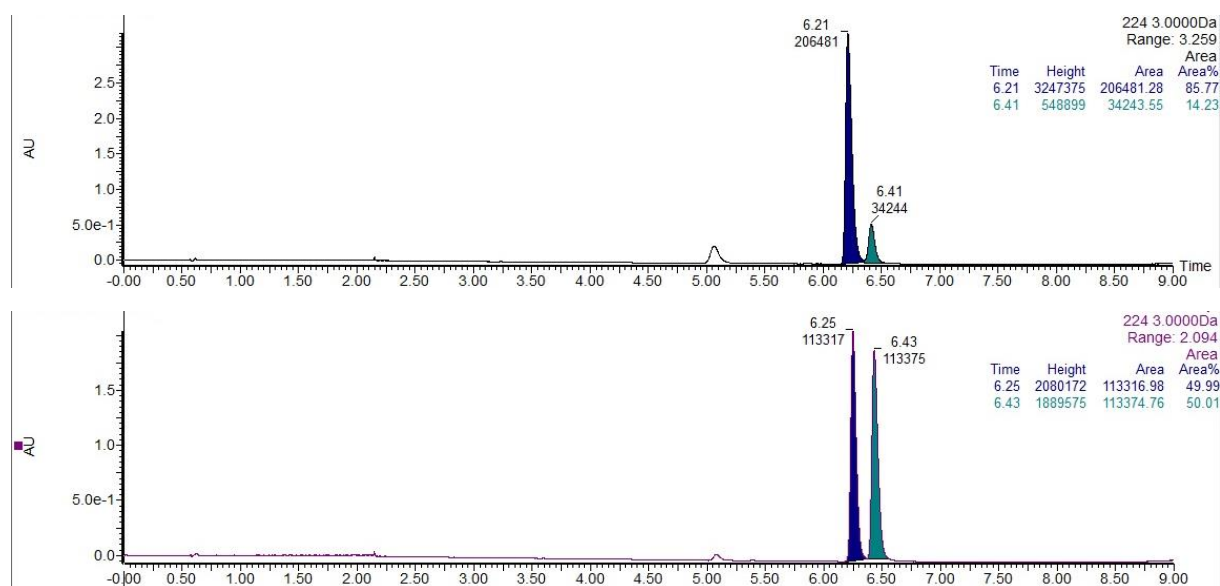

Supplementary Figure 28: UPC<sup>2</sup> traces of **3a'**

## General Procedure for the Cross-Electrophile Coupling of Enals and Acrylates

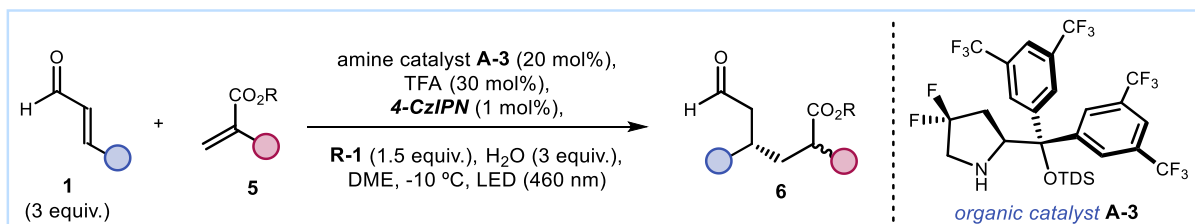

**General Procedure E (for 0.25 mmol scale):** To a 8.0 mL argon-purged glass vial, containing the acrylate **5** (1.0 equiv.), enal **1** (3.0 equiv.), DHP **R-1** (375  $\mu$ mol, 1.5 equiv.), 4-CzIPN (2.50  $\mu$ mol, 1 mol%) and amine catalyst **A-3** (50.0  $\mu$ mol, 20 mol%), was added 500  $\mu$ L of dimethoxyethane, H<sub>2</sub>O (2.50 mmol, 10 equiv.) and TFA (75.0  $\mu$ mol, 30 mol%). The vial was sealed with Parafilm, and then placed into a cooled aluminium support mounted on an aluminium block fitted with a 460 nm high-power single LED ( $\lambda = 460$  nm, irradiance = 90 mW/cm<sup>2</sup>, as controlled by an external power supply; the set-up is detailed in **Supplementary Figure 1**). This set-up secured a reliable irradiation while keeping a constant distance of 1 cm between the reaction vessel and the light source. The reaction was stirred under visible light irradiation at -10 °C internal temperature for 16 hours. Then the solvent was evaporated, and the crude mixture was purified by column chromatography on silica gel to furnish product **6** in the stated yield and enantiomeric purity. Diastereomeric ratio was determined by <sup>1</sup>H NMR analysis of the crude mixture. The light source for illuminating the reaction vessel consisted in a 460 nm high-power single LED (OCU-440 UE460-X-T) purchased from OSA OPTO.

### Derivatization of **6** for determination of enantiomeric ratio by UPC<sup>2</sup> analysis

Determination of enantiomeric ratios of the individual diastereoisomers of 1,6-dicarbonyls **6** failed in our hands due to inseparability of the 4 stereoisomers. Therefore, the following reaction sequence was performed for e.r. determination of the individual diastereoisomers (as outlined in **Supplementary Figure 29**). Upon global reduction of **6**, the diastereoisomeric mixture of the obtained diols could be separated by preparative TLC. Then, the individual diastereomeric diols were converted to their 4-nitrobenzoic esters by global acylation which could then be used for determination of the e.r. values by UPC<sup>2</sup> analysis.

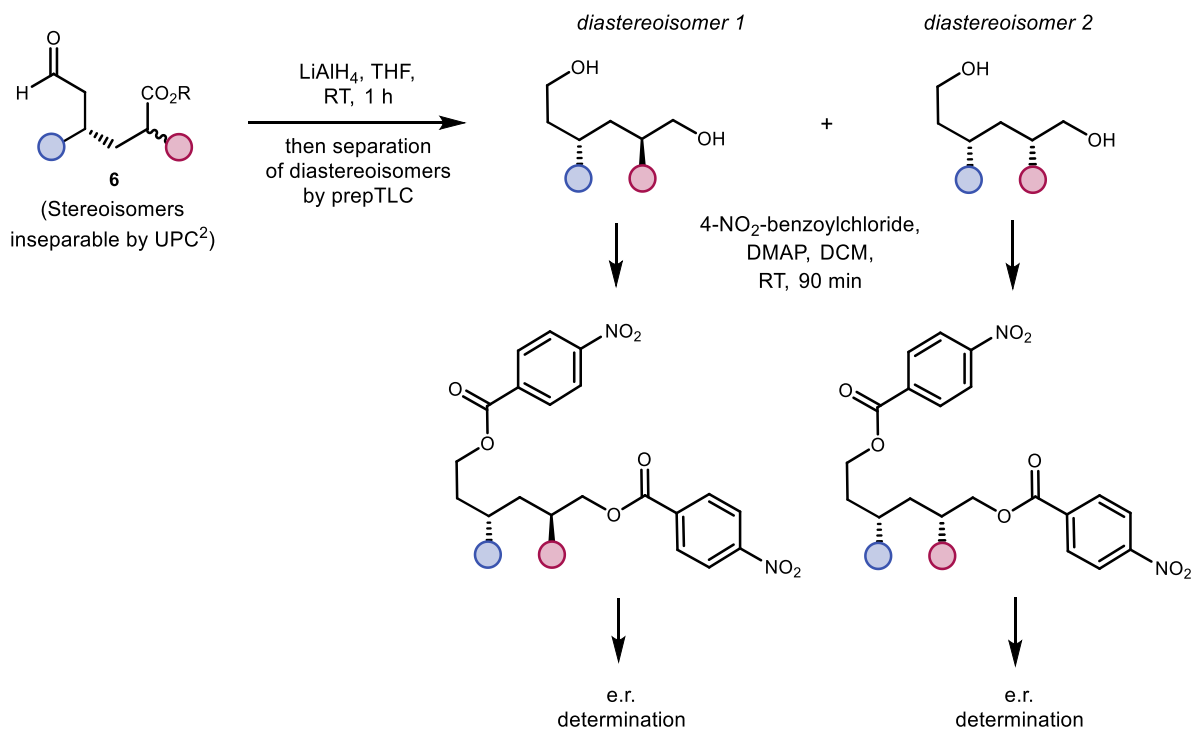

**Supplementary Figure 29:** Reaction sequence to separate diastereoisomers and determine e.r. of **6**

### Procedure:

An analytical sample of 1,6-dicarbonyl product **6** (5.00 mg) was dissolved in 500  $\mu\text{L}$  of THF.  $\text{LiAlH}_4$  (5 equiv.) were added and the mixture was stirred for 1 h. The reaction mixture was diluted with  $\text{Et}_2\text{O}$  (2.0 mL), quenched with Glauber's salt ( $\text{NaSO}_4 \cdot 10 \text{H}_2\text{O}$ ) and then filtered over a pad of silica gel, which was subsequently rinsed with  $\text{EtOAc}$ . The volatiles were removed under reduced pressure and the two diastereomeric diols were separated by preparative TLC using  $\text{EtOAc}$  in hexanes (generally 75%  $\text{EtOAc}$  in hexanes).

The obtained diols were then further functionalized to the 4-nitrobenzoates as follows. The diol together with a slight excess of both *p*- $\text{NO}_2$ -benzoyl chloride and 4-dimethylaminopyridine (DMAP) were suspended in DCM (0.5 mL) and the solution was allowed to stir for 90 minutes. The ester was separated by preparative TLC from unreacted starting material (generally 25%  $\text{EtOAc}$  in hexanes) and analyzed by  $\text{UPC}^2$  analysis with conditions specified in the experimental section of the individual compounds.

## Characterization Data of the Cross Electrophile Coupling Products 6

### 4-Methoxybenzyl (4*S*)-4-(2-oxoethyl)-2-phenylnonanoate (**6a**)

Following the general procedure **E** using acrylate **5a** (250  $\mu$ mol, 67.0 mg) and 2-octenal **1a** (750  $\mu$ mol, 94.5 mg, 112  $\mu$ L), purification of the crude product by flash column chromatography (silica gel, 5-10% EtOAc in hexanes) afforded product **6a** as a pale yellow oil (91.0 mg, 92% yield) in a 1:1 diastereomeric ratio. The enantiomeric ratio of the corresponding 4-nitrobenzoate derivative, prepared following the general procedure, was determined to be 94:6 for *diastereomer 1* by UPC<sup>2</sup> analysis on a Daicel Chiralpak OJ-3 column (eluent: 100% CO<sub>2</sub> for 1 min, gradient 100% - 85% CO<sub>2</sub> in CH<sub>3</sub>CN for 5 min, 85% CO<sub>2</sub> in CH<sub>3</sub>CN for 2 min, gradient 85% - 100% CO<sub>2</sub> in CH<sub>3</sub>CN for 1 min; flow rate 2.0 mL/min,  $\lambda$  = 256 nm)  $\tau_{Major}$  = 4.60 min,  $\tau_{Minor}$  = 4.35 min, and 87:13 for *diastereomer 2* by UPC<sup>2</sup> analysis on a Daicel Chiralpak ID-3 column (eluent: 100% CO<sub>2</sub> for 1 min, gradient 100% - 80% CO<sub>2</sub> in CH<sub>3</sub>CN for 5 min, 80% CO<sub>2</sub> in CH<sub>3</sub>CN for 2 min, gradient 80% - 100% CO<sub>2</sub> in CH<sub>3</sub>CN for 1 min; flow rate 2.0 mL/min,  $\lambda$  = 256 nm)  $\tau_{Major}$  = 7.80 min,  $\tau_{Minor}$  = 7.45 min.

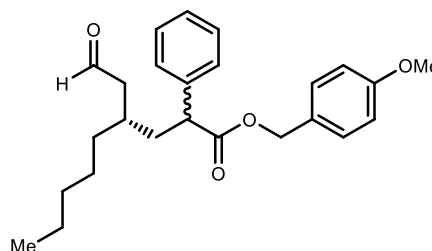

Chemical Formula: C<sub>25</sub>H<sub>32</sub>O<sub>4</sub>  
Molecular Weight: 396.53

$[\alpha]_D^{26}$  = -6.5 (c = 1.0, CHCl<sub>3</sub>, 1:1 d.r., 94:6 e.r.<sup>1</sup>, 87:13 e.r.<sup>2</sup>).

**<sup>1</sup>H NMR (400 MHz, CDCl<sub>3</sub>, mixture of diastereoisomers):**  $\delta$  = 9.63 (t, *J* = 2.4 Hz, 1H), 9.60 (t, *J* = 2.2 Hz, 1H), 7.34 – 7.25 (m, 10H), 7.21 – 7.15 (m, 4H), 6.87 – 6.80 (m, 4H), 5.08 (d, *J* = 12.0 Hz, 2H), 4.98 (d, *J* = 12.1 Hz, 1H), 4.97 (d, *J* = 12.1 Hz, 1H), 3.80 (s, 6H), 3.66 (td, *J* = 7.8, 3.6 Hz, 2H), 2.30 (ddt, *J* = 4.5, 2.2, 1.0 Hz, 4H), 2.17 – 2.10 (m, 1H), 2.06 – 1.99 (m, 1H), 1.88 – 1.80 (m, 3H), 1.75 (dd, *J* = 13.7, 7.0 Hz, 1H), 1.30 – 1.15 (m, 16H), 0.88 – 0.82 (m, 6H) ppm. **<sup>13</sup>C NMR (101 MHz, CDCl<sub>3</sub>, mixture of diastereoisomers):**  $\delta$  = 202.7, 202.5, 173.7, 173.7, 159.7 (2C), 138.8, 138.8, 130.0, 130.02, 128.8, 128.8, 128.1, 128.1 (2C), 128.0, 127.5 (2C), 114.0 (2C), 66.6 (2C), 55.4 (2C), 49.4, 49.4, 48.3, 48.2, 38.0, 38.0, 34.0, 33.9, 32.0, 32.0, 31.1, 31.0, 26.1, 26.0, 22.6 (2C), 14.1, 14.1 ppm.

**HRMS (ESI):** m/z calculated for [C<sub>25</sub>H<sub>32</sub>O<sub>4</sub>Na]<sup>+</sup> [M+Na]<sup>+</sup>: 419.2193; found: 419.2193.

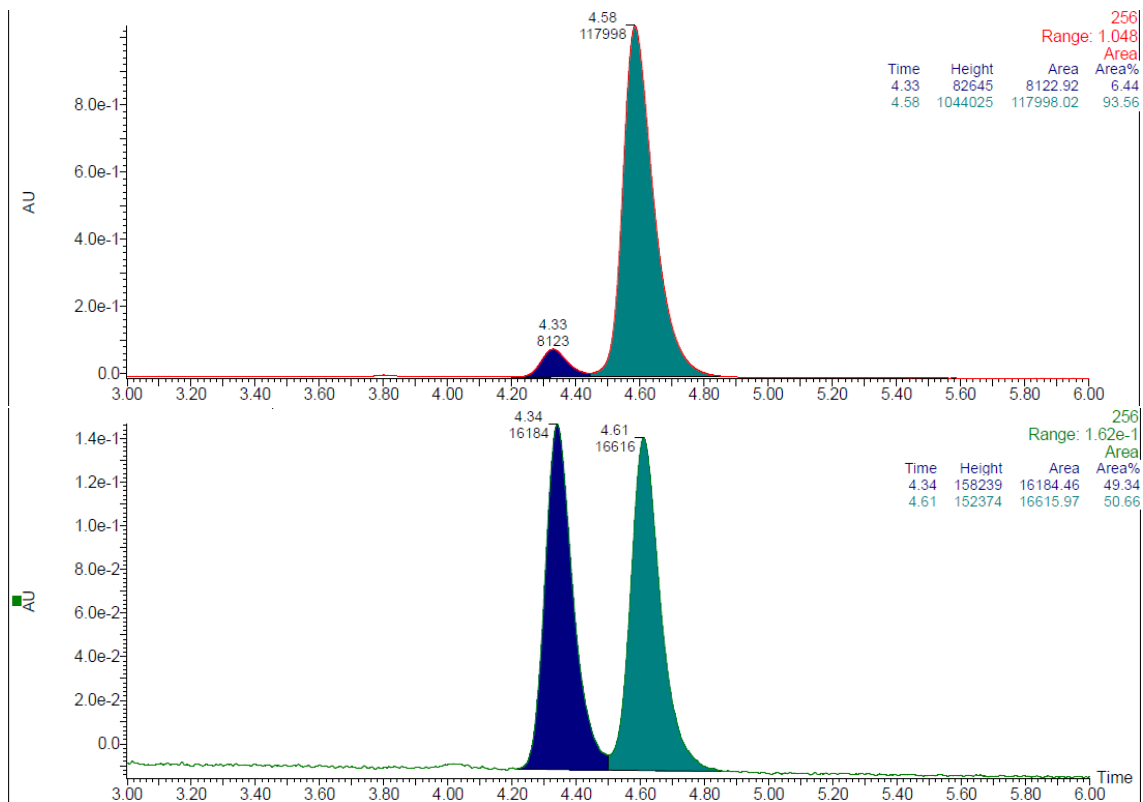

Supplementary Figure 30: UPC<sup>2</sup> traces of **6a**, diastereomer 1.

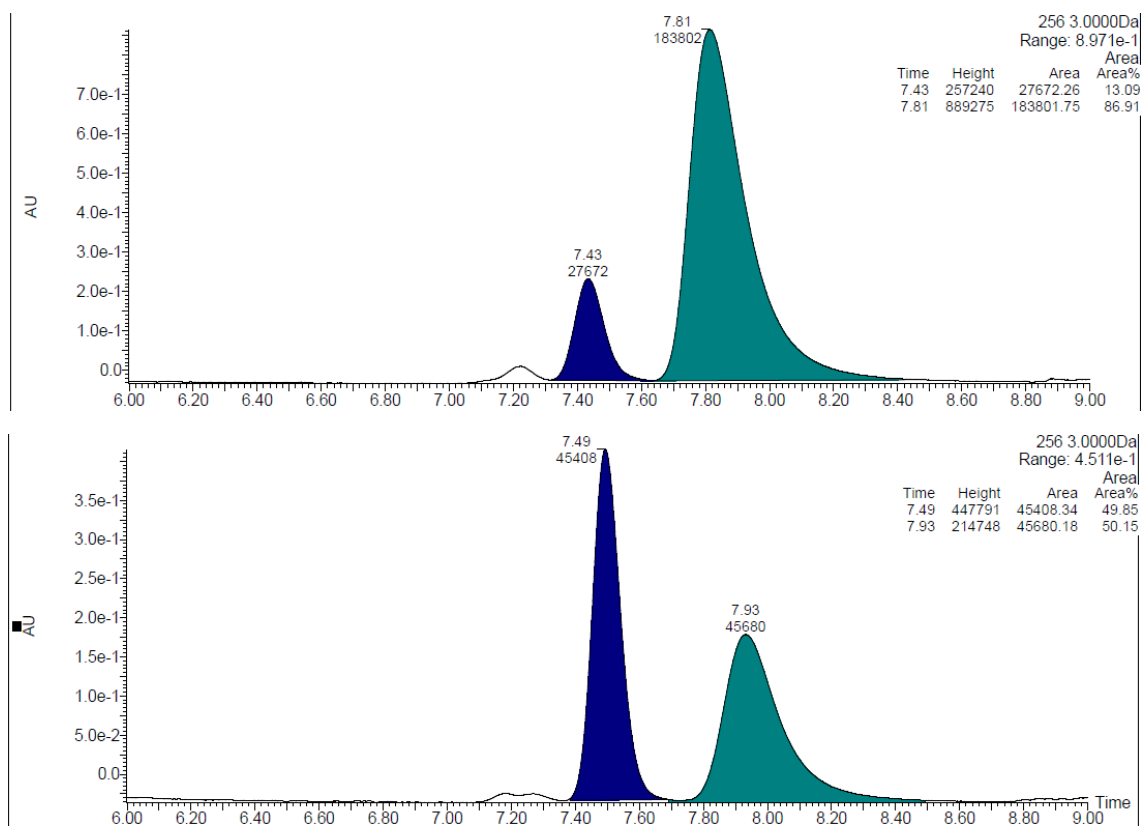

Supplementary Figure 31: UPC<sup>2</sup> traces of **6a**, diastereomer 2.

#### 4-Methoxybenzyl (4S)-4-(2-oxoethyl)-2-phenylnonanoate (**6a**) (1.00 mmol scale experiment)

To a 8.0 mL argon-purged glass vial, containing the acrylate **5a** (1.00 mmol, 268 mg, 1 equiv.), octenal **1a** (3.00 mmol, 379 mg, 448  $\mu$ L), DHP **R-3\*** (1.20 mmol, 532 mg 1.2 equiv.), 4-CzIPN (10.0  $\mu$ mol, 7.9 mg, 1 mol%) and amine catalyst **A-3** (2.00 mmol, 141 mg, 20 mol%), was added 2.0 mL of dimethoxyethane, H<sub>2</sub>O (10.0 mmol, 180  $\mu$ L, 10 equiv.) and TFA (300  $\mu$ mol, 23  $\mu$ L, 30 mol%). The vial was sealed with Parafilm, and then placed into a cooled aluminium support mounted on an aluminium block fitted with a 460 nm high-power single LED

( $\lambda = 460$  nm, irradiance = 90 mW/cm<sup>2</sup>, as controlled by an external power supply; the set-up is detailed in **Supplementary Figure 1**). This set-up secured a reliable irradiation while keeping a constant distance of 1 cm between the reaction vessel and the light source. The reaction was stirred under visible light irradiation at -10 °C internal temperature for 72 hours. Then the solvent was evaporated, and the crude mixture was purified by flash column chromatography (silica gel, 5-10% EtOAc in hexanes) to afford product **6a** as a pale yellow oil (258 mg, 65% yield) in a 1:1 diastereomeric ratio. The light source for illuminating the reaction vessel consisted in a 460 nm high-power single LED (OCU-440 UE460-X-T) purchased from OSA OPTO. The enantiomeric ratio of the corresponding 4-nitrobenzoate derivative, prepared following the general procedure, was determined to be 93:7 for *diastereomer 1* by UPC<sup>2</sup> analysis on a Daicel Chiralpak OJ-3 column (eluent: 100% CO<sub>2</sub> for 1 min, gradient 100% - 85% CO<sub>2</sub> in CH<sub>3</sub>CN for 5 min, 85% CO<sub>2</sub> in CH<sub>3</sub>CN for 2 min, gradient 85% - 100% CO<sub>2</sub> in CH<sub>3</sub>CN for 1 min; flow rate 2.0 mL/min,  $\lambda = 256$  nm)  $\tau_{Major} = 4.65$  min,  $\tau_{Minor} = 4.40$  min, and 84:16 for *diastereomer 2* by UPC<sup>2</sup> analysis on a Daicel Chiralpak ID-3 column (eluent: 100% CO<sub>2</sub> for 1 min, gradient 100% - 80% CO<sub>2</sub> in CH<sub>3</sub>CN for 5 min, 80% CO<sub>2</sub> in CH<sub>3</sub>CN for 2 min, gradient 80% - 100% CO<sub>2</sub> in CH<sub>3</sub>CN for 1 min; flow rate 2.0 mL/min,  $\lambda = 256$  nm)  $\tau_{Major} = 8.00$  min,  $\tau_{Minor} = 7.55$  min.

Spectroscopic data are consistent with those of the smaller scale reaction.

\* Reductant **R-3** (**Supplementary Figure 83**) was used for enhanced solubility

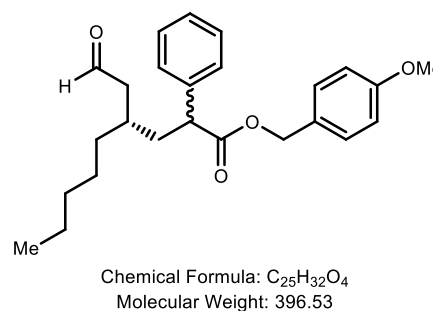

#### 4-Methoxybenzyl (S)-4-methyl-6-oxo-2-phenylhexanoate (**6b**)

Following the general procedure **E** using acrylate **5a** (250  $\mu\text{mol}$ , 67.0 mg) and enal **1b** (750  $\mu\text{mol}$ , 52.5 mg, 61.6  $\mu\text{L}$ ), purification of the crude product by flash column chromatography (silica gel, 5-10% EtOAc in hexanes) afforded product **6b** as a pale yellow oil (60.0 mg, 71% yield) in a 1:1 diastereomeric ratio. The enantiomeric ratio of the corresponding 4-nitrobenzoate derivative, prepared following the general procedure, was determined to be 87:13 for

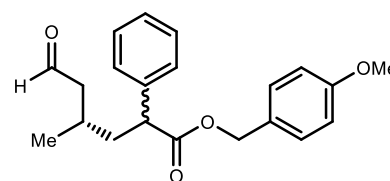

Chemical Formula:  $\text{C}_{21}\text{H}_{24}\text{O}_4$   
Molecular Weight: 340.42

*diastereomer 1* by UPC<sup>2</sup> analysis on a Daicel Chiralpak IA-3 column (eluent: 100%  $\text{CO}_2$  for 1 min, gradient 100% - 70%  $\text{CO}_2$  in MeOH for 8 min, 70%  $\text{CO}_2$  in MeOH for 4 min, gradient 70% - 100%  $\text{CO}_2$  in MeOH for 2 min; flow rate 2.0 mL/min,  $\lambda = 256$  nm)  $\tau_{\text{Major}} = 10.65$  min,  $\tau_{\text{Minor}} = 10.95$  min, and 76.5:23.5 for *diastereomer 2* by UPC<sup>2</sup> analysis on a Daicel Chiralpak ID-3 column (eluent: 100%  $\text{CO}_2$  for 1 min, gradient 100% - 60%  $\text{CO}_2$  in  $\text{CH}_3\text{CN}$  for 5 min, 60%  $\text{CO}_2$  in  $\text{CH}_3\text{CN}$  for 2 min, gradient 60% - 100%  $\text{CO}_2$  in  $\text{CH}_3\text{CN}$  for 1 min; flow rate 2.0 mL/min,  $\lambda = 256$  nm)  $\tau_{\text{Major}} = 6.10$  min,  $\tau_{\text{Minor}} = 5.65$  min.

$[\alpha]_{\text{D}}^{26} = -11.2$  ( $c = 1.0$ ,  $\text{CHCl}_3$ , 1:1 d.r., 87:13 e.r.<sup>1</sup>, 76.5:23.5 e.r.<sup>2</sup>).

**<sup>1</sup>H NMR (500 MHz,  $\text{CDCl}_3$ , mixture of diastereoisomers):**  $\delta = 9.66 - 9.63$  (m, 1H), 9.63 - 9.61 (m, 1H), 7.35 - 7.25 (m, 10H), 7.22 - 7.16 (m, 4H), 6.87 - 6.82 (m, 4H), 5.08 (d,  $J = 12.1$  Hz, 2H), 5.00 (d,  $J = 12.0$  Hz, 1H), 4.97 (d,  $J = 12.1$  Hz, 1H), 3.79 (s, 6H), 3.73 - 3.65 (m, 2H), 2.42 - 2.34 (m, 2H), 2.24 - 2.13 (m, 3H), 2.02 - 1.87 (m, 4H), 1.68 - 1.63 (m, 1H), 0.98 (d,  $J = 6.7$  Hz, 3H), 0.95 (d,  $J = 6.2$  Hz, 3H) ppm. **<sup>13</sup>C NMR (126 MHz,  $\text{CDCl}_3$ , mixture of diastereoisomers):**  $\delta = 202.3$ , 202.2, 173.8, 173.6, 159.7 (2C), 139.0, 138.4, 130.0, 130.0, 128.8 (2C), 128.2, 128.0 (2C), 128.0, 127.6, 127.5, 114.0 (2C), 66.6 (2C), 55.4 (2C), 51.0, 50.8, 49.4, 49.3, 40.7, 40.0, 26.5, 26.0, 19.9, 19.5 ppm.

**HRMS (ESI):**  $m/z$  calculated for  $[\text{C}_{21}\text{H}_{24}\text{O}_4\text{Na}]^+$   $[\text{M}+\text{Na}]^+$ : 363.1567; found: 363.1566.



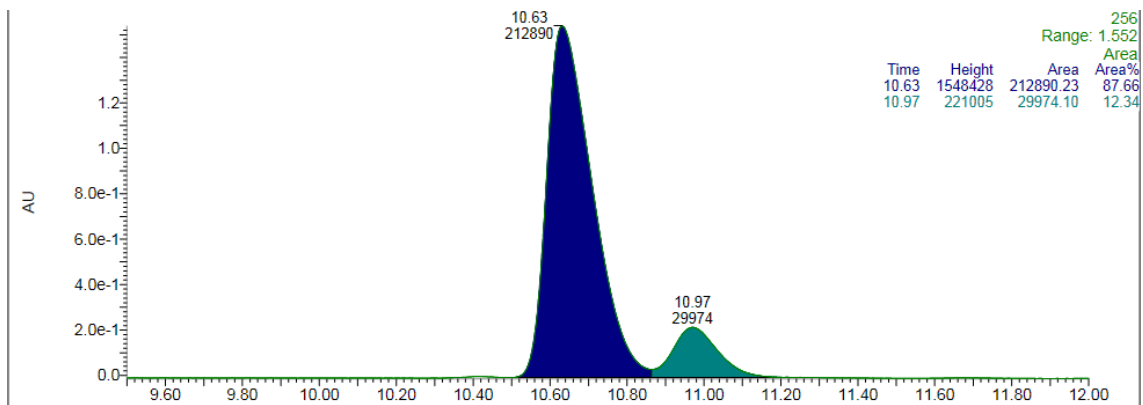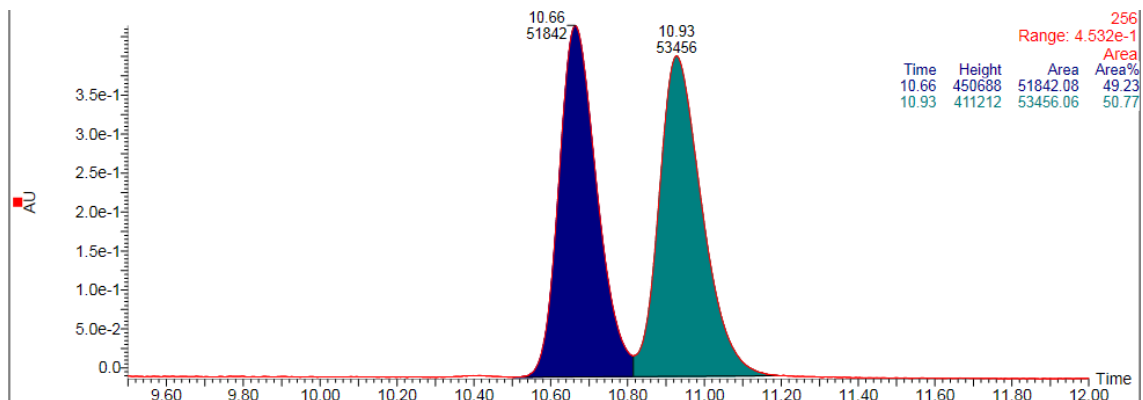

Supplementary Figure 32: UPC<sup>2</sup> traces of **6b**, diastereomer 1.

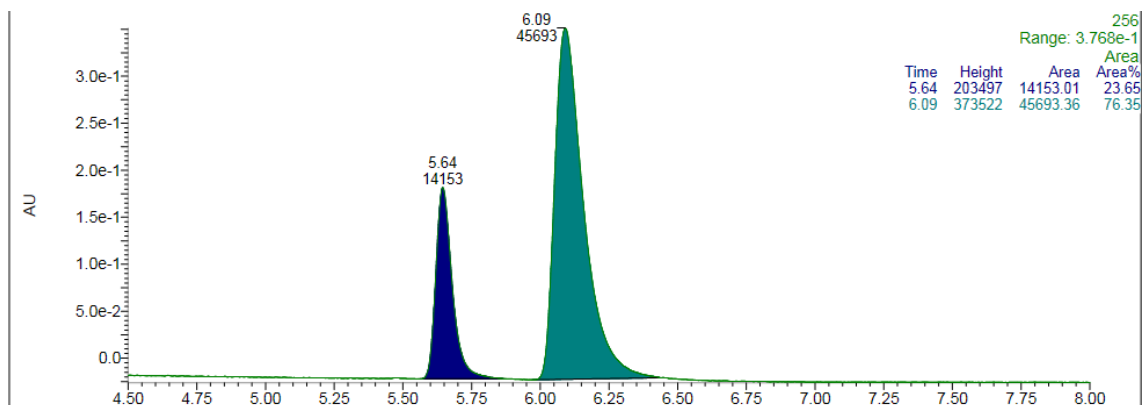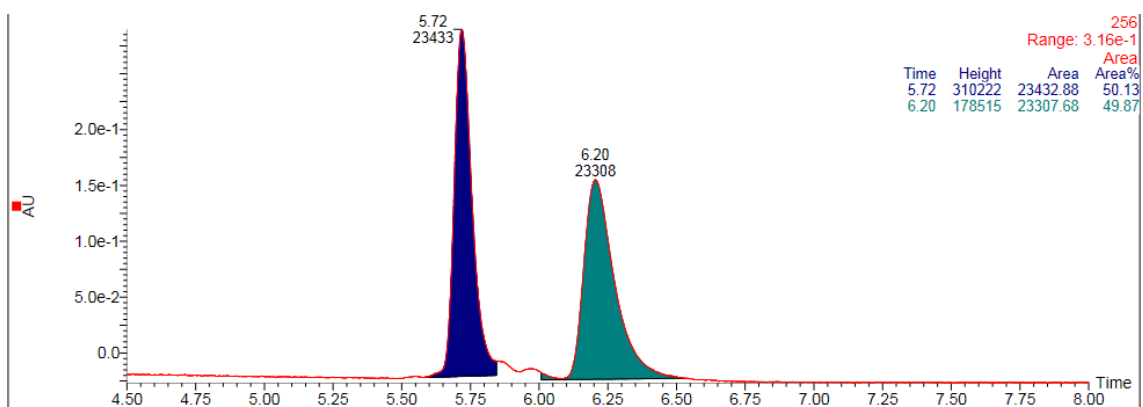

Supplementary Figure 33: UPC<sup>2</sup> traces of **6b**, diastereomer 2.

#### 4-Methoxybenzyl (S)-4-isopropyl-6-oxo-2-phenylhexanoate (6c)

Following the general procedure E using acrylate 5a (250  $\mu$ mol, 67.0 mg) and enal 1c (750  $\mu$ mol, 73.5 mg, 87.0  $\mu$ L), purification of the crude product by flash column chromatography (silica gel, 5-10% EtOAc in hexanes) afforded product 6c as a pale yellow oil (42.0 mg, 46% yield) in a 1.1:1 diastereomeric ratio. The enantiomeric ratio of the corresponding 4-nitrobenzoate derivative, prepared following the general procedure, was determined to be

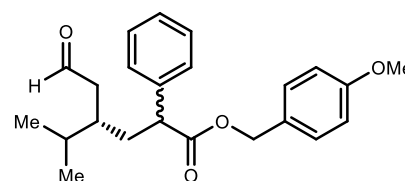

93:7 for *diastereomer 1* by UPC<sup>2</sup> analysis on a Daicel Chiralpak OJ-3 column (eluent: 99% CO<sub>2</sub> in CH<sub>3</sub>CN for 20 min; flow rate 2.0 mL/min,  $\lambda$  = 256 nm)  $\tau_{Major}$  = 14.0 min,  $\tau_{Minor}$  = 12.15 min, and 89:11 for *diastereomer 2* by UPC<sup>2</sup> analysis on a Daicel Chiralpak ID-3 column (eluent: 100% CO<sub>2</sub> for 1 min, gradient 100% - 60% CO<sub>2</sub> in CH<sub>3</sub>CN for 5 min, 60% CO<sub>2</sub> in CH<sub>3</sub>CN for 2 min, gradient 60% - 100% CO<sub>2</sub> in CH<sub>3</sub>CN for 1 min; flow rate 2.0 mL/min,  $\lambda$  = 258 nm)  $\tau_{Major}$  = 5.60 min,  $\tau_{Minor}$  = 5.35 min.

$[\alpha]_D^{26}$  = +2.4 (c = 0.5, CHCl<sub>3</sub>, 1.1:1 d.r., 93:7 e.r.<sup>1</sup>, 89:11 e.r.<sup>2</sup>).

**<sup>1</sup>H NMR (400 MHz, CDCl<sub>3</sub>, mixture of diastereoisomers):**  $\delta$  = 9.61 (t,  $J$  = 2.4 Hz, 1H), 9.58 (t,  $J$  = 2.2 Hz, 1H), 7.34 – 7.24 (m, 10H), 7.22 – 7.15 (m, 4H), 6.88 – 6.81 (m, 4H), 5.09 (d,  $J$  = 12.0 Hz, 1H), 5.08 (d,  $J$  = 12.0 Hz, 1H), 4.98 (d,  $J$  = 12.0 Hz, 1H), 4.97 (d,  $J$  = 12.1 Hz, 1H), 3.79 (s, 6H), 3.65 – 3.59 (m, 2H), 2.39 – 2.29 (m, 2H), 2.26 – 2.15 (m, 3H), 1.95 – 1.90 (m, 1H), 1.85 – 1.70 (m, 4H), 1.69 – 1.58 (m, 2H), 0.84 (d,  $J$  = 6.8 Hz, 3H), 0.83 – 0.79 (m, 6H), 0.78 (d,  $J$  = 6.8 Hz, 3H) ppm. **<sup>13</sup>C NMR (101 MHz, CDCl<sub>3</sub>, mixture of diastereoisomers):**  $\delta$  = 203.0, 202.8, 173.8, 173.7, 159.7 (2C), 138.9, 138.7, 130.1, 130.1, 128.9, 128.9, 128.2, 128.1, 128.1 (2C), 127.6, 127.6, 114.0 (2C), 66.6 (2C), 55.4 (2C), 49.7, 49.6, 45.3, 45.2, 36.4, 36.2, 35.6, 35.2, 30.1, 30.1, 19.5, 19.4, 18.4, 18.2 ppm.

**HRMS (ESI):** m/z calculated for [C<sub>23</sub>H<sub>28</sub>O<sub>4</sub>Na]<sup>+</sup> [M+Na]<sup>+</sup>: 391.1880; found: 391.1872.

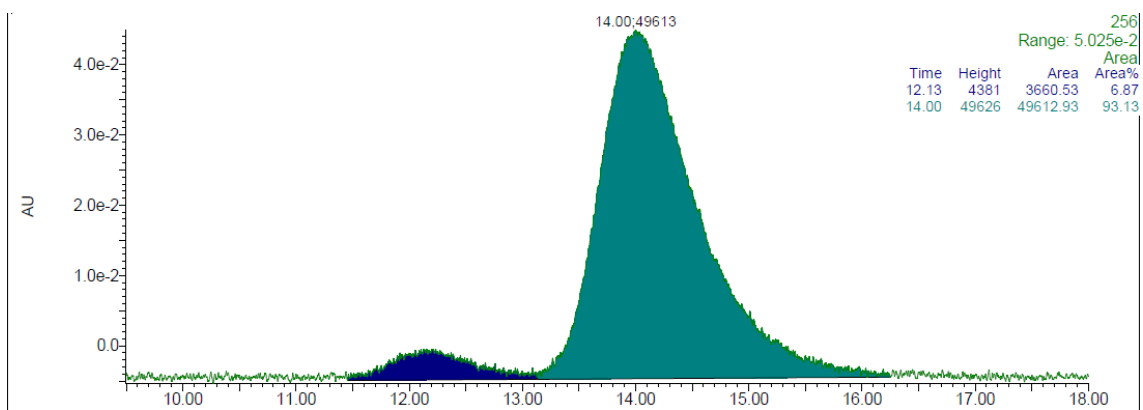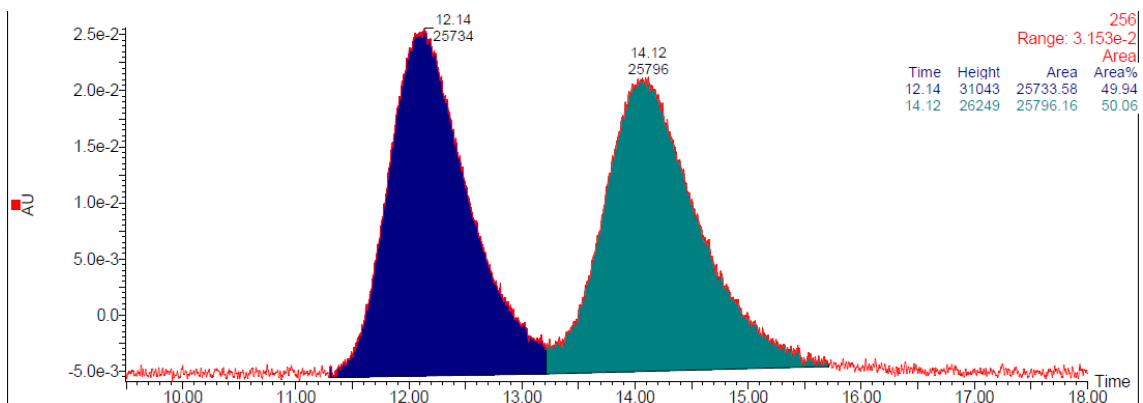

Supplementary Figure 34: UPC<sup>2</sup> traces of **6c**, diastereomer 1.

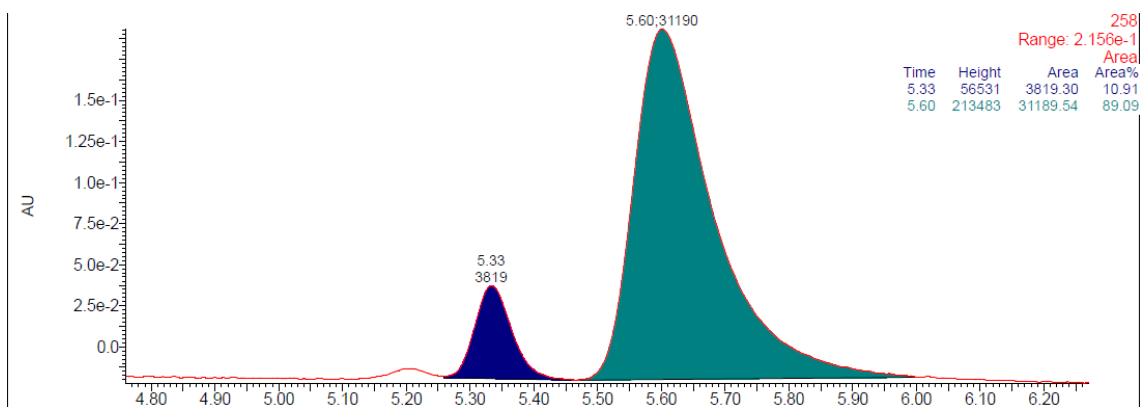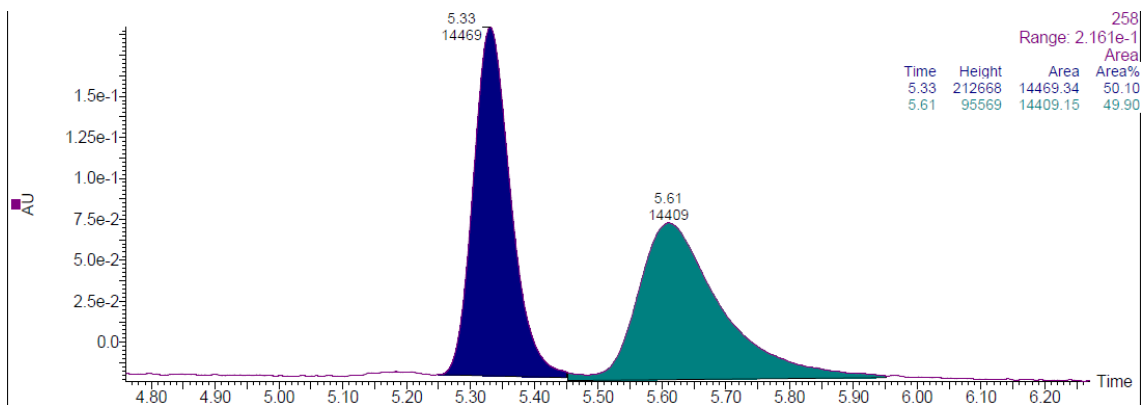

Supplementary Figure 35: UPC<sup>2</sup> traces of **6c**, diastereomer 2.

#### 4-Methoxybenzyl (S)-6-methyl-4-(2-oxoethyl)-2-phenylheptanoate (6d)

Following the general procedure E using acrylate **5a** (250  $\mu\text{mol}$ , 67.0 mg) and a solution of enal **1d** (750  $\mu\text{mol}$ , 187 mg, 45 wt% in hexanes), purification of the crude product by flash column chromatography (silica gel, 5-10% EtOAc in hexanes) afforded product **6d** as a pale yellow oil (54.0 mg, 56% yield) in a 1.1:1 diastereomeric ratio. The enantiomeric ratio of the corresponding 4-nitrobenzoate derivative, prepared following the general procedure, was determined to be 93.5:6.5 for *diastereomer 1* by

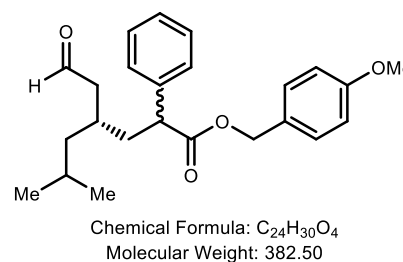

UPC<sup>2</sup> analysis on a Daicel Chiralpak OJ-3 column (eluent: 100% CO<sub>2</sub> for 1 min, gradient 100% - 95% CO<sub>2</sub> in CH<sub>3</sub>CN for 5 min, 95% CO<sub>2</sub> in CH<sub>3</sub>CN for 2 min, gradient 95% - 100% CO<sub>2</sub> in CH<sub>3</sub>CN for 1 min; flow rate 2.0 mL/min,  $\lambda = 256$  nm)  $\tau_{Major} = 6.50$  min,  $\tau_{Minor} = 5.95$  min, and 89:11 for *diastereomer 2* by UPC<sup>2</sup> analysis on a Daicel Chiralpak ID-3 column (eluent: 100% CO<sub>2</sub> for 1 min, gradient 100% - 60% CO<sub>2</sub> in CH<sub>3</sub>CN for 5 min, 60% CO<sub>2</sub> in CH<sub>3</sub>CN for 2 min, gradient 60% - 100% CO<sub>2</sub> in CH<sub>3</sub>CN for 1 min; flow rate 2.0 mL/min,  $\lambda = 256$  nm)  $\tau_{Major} = 5.40$  min,  $\tau_{Minor} = 5.20$  min.

$[\alpha]_D^{26} = -1.1$  (c = 1.0, CHCl<sub>3</sub>, 1.1:1 d.r., 93.5:6.5 e.r.<sup>1</sup>, 89:11 e.r.<sup>2</sup>).

**<sup>1</sup>H NMR (400 MHz, CDCl<sub>3</sub>, mixture of diastereoisomers):**  $\delta = 9.62$  (t,  $J = 2.4$  Hz, 1H), 9.60 (t,  $J = 2.3$  Hz, 1H), 7.33 – 7.24 (m, 10H), 7.19 (dd,  $J = 8.7, 2.2$  Hz, 4H), 6.86 – 6.81 (m, 4H), 5.10 (d,  $J = 12.0$  Hz, 1H), 5.08 (d,  $J = 12.0$  Hz, 2H), 4.98 (d,  $J = 12.0$  Hz, 1H), 4.96 (d,  $J = 12.0$  Hz, 2H), 3.79 (s, 6H), 3.67 (t,  $J = 7.7$  Hz, 2H), 2.37 – 2.23 (m, 4H), 2.18 – 2.10 (m, 1H), 2.07 – 1.98 (m, 1H), 1.92 – 1.79 (m, 3H), 1.75 – 1.68 (m, 1H), 1.62 – 1.54 (m, 2H), 1.22 – 1.05 (m, 6H), 0.85 (d,  $J = 6.6$  Hz, 3H), 0.78 (d,  $J = 6.6$  Hz, 3H), 0.76 (d,  $J = 6.6$  Hz, 3H), 0.75 (d,  $J = 6.6$  Hz, 3H) ppm. **<sup>13</sup>C NMR (101 MHz, CDCl<sub>3</sub>, mixture of diastereoisomers):**  $\delta = 202.7, 202.6, 173.7, 173.7, 159.7$  (2C), 138.8, 138.7, 130.1, 130.1, 128.9, 128.8, 128.1, 128.1 (2C), 128.1, 127.6, 127.5, 114.0, 114.0, 66.6 (2C), 55.4 (2C), 49.4, 49.3, 48.6, 48.5, 44.0, 43.9, 38.4, 38.3, 29.0, 29.0, 25.2 (2C), 23.0, 22.7, 22.6, 22.6 ppm.

**HRMS (ESI):** m/z calculated for [C<sub>24</sub>H<sub>30</sub>O<sub>4</sub>Na]<sup>+</sup> [M+Na]<sup>+</sup>: 405.2036; found: 405.2038.

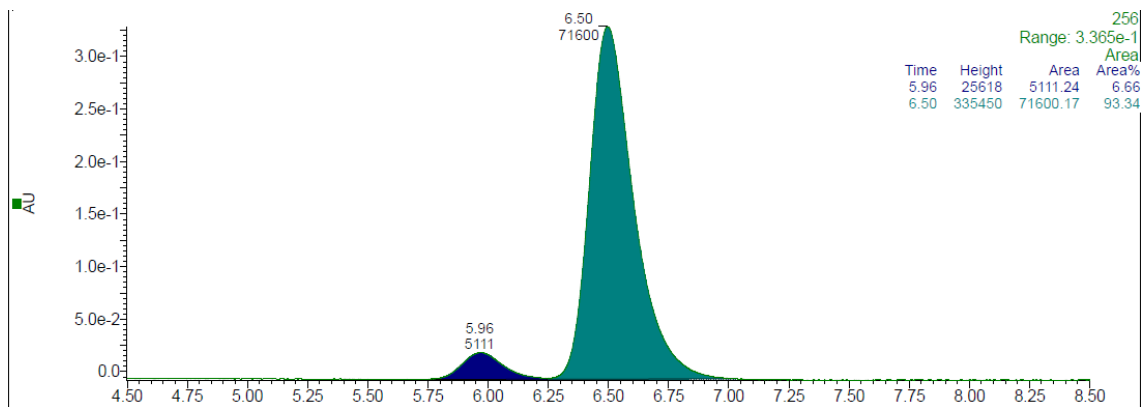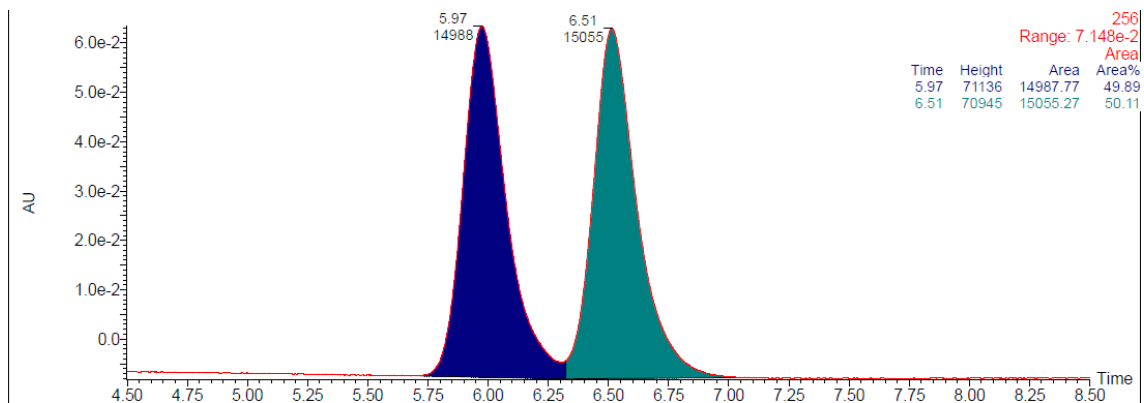

Supplementary Figure 36: UPC<sup>2</sup> traces of **6d**, diastereomer 1.

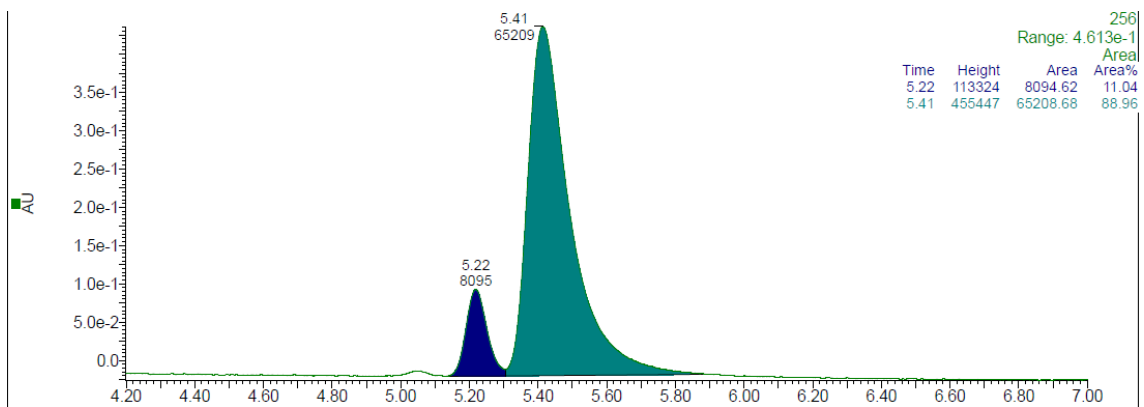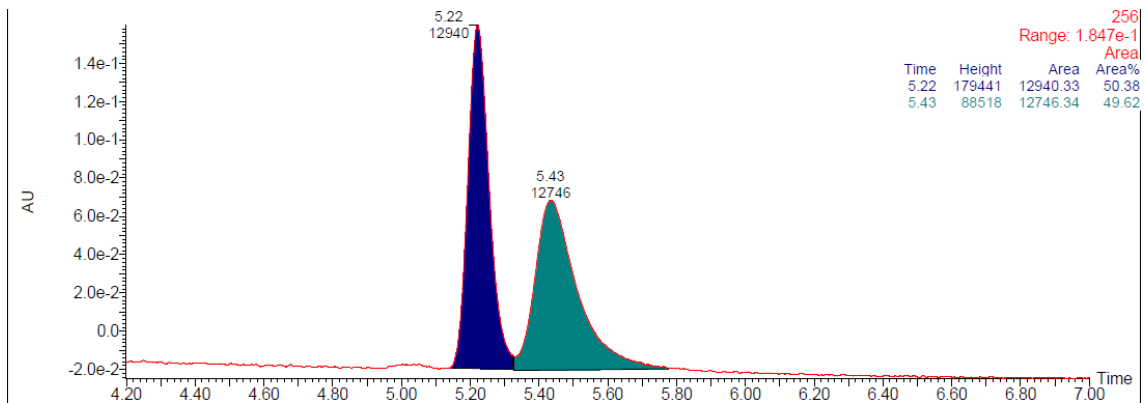

Supplementary Figure 37: UPC<sup>2</sup> traces of **6d**, diastereomer 2

#### 4-Methoxybenzyl (S)-6-oxo-4-phenethyl-2-phenylhexanoate (6e)

Following the general procedure **E** using acrylate **5a** (250  $\mu\text{mol}$ , 67.0 mg) and enal **1e** (750  $\mu\text{mol}$ , 120 mg), purification of the crude product by flash column chromatography (silica gel, 5-10% EtOAc in hexanes) and preparative thin layer chromatography (silica gel, DCM) afforded product **6e** as a pale yellow oil (84.0 mg, 78% yield) in a 1.1:1 diastereomeric ratio. The enantiomeric ratio of the corresponding 4-nitrobenzoate derivative, prepared following the general procedure, was determined to be 92:8 for *diastereomer 1* by UPC<sup>2</sup> analysis on a Daicel Chiralpak OJ-3 column (eluent: 100% CO<sub>2</sub> for 1 min, gradient 100% - 75% CO<sub>2</sub> in CH<sub>3</sub>CN for 8 min, 75% CO<sub>2</sub> in CH<sub>3</sub>CN for 4 min, gradient 75% - 100% CO<sub>2</sub> in CH<sub>3</sub>CN for 2 min; flow rate 2.0 mL/min,  $\lambda = 256$  nm)  $\tau_{\text{Major}} = 6.10$  min,  $\tau_{\text{Minor}} = 5.65$  min, and 84.5:15.5 for *diastereomer 2* by UPC<sup>2</sup> analysis on a Daicel Chiralpak ID-3 column (eluent: 85% CO<sub>2</sub> in CH<sub>3</sub>CN for 20 min; flow rate 2.0 mL/min,  $\lambda = 256$  nm)  $\tau_{\text{Major}} = 12.75$  min,  $\tau_{\text{Minor}} = 11.60$  min.

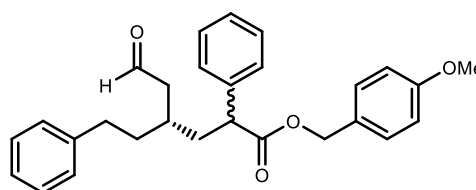

Chemical Formula: C<sub>28</sub>H<sub>30</sub>O<sub>4</sub>  
Molecular Weight: 430.54

$[\alpha]_{\text{D}}^{26} = -4.6$  (c = 1.0, CHCl<sub>3</sub>, 1.1:1 d.r., 92:8 e.r.<sup>1</sup>, 84.5:15.5 e.r.<sup>2</sup>).

**<sup>1</sup>H NMR (500 MHz, CDCl<sub>3</sub>, mixture of diastereoisomers):**  $\delta = 9.65$  (t,  $J = 2.3$  Hz, 1H), 9.62 (t,  $J = 2.1$  Hz, 1H), 7.38 – 7.25 (m, 14H), 7.24 – 7.18 (m, 6H), 7.17 – 7.12 (m, 2H), 7.12 – 7.07 (m, 2H), 6.90 – 6.83 (m, 4H), 5.10 (d,  $J = 12.0$  Hz, 1H), 5.10 (d,  $J = 12.0$  Hz, 1H), 5.01 (d,  $J = 12.0$  Hz, 1H), 5.00 (d,  $J = 12.0$  Hz, 1H), 3.83 (s, 3H), 3.82 (s, 3H), 3.74 – 3.65 (m, 2H), 2.62 – 2.52 (m, 4H), 2.44 – 2.37 (m, 4H), 2.29 – 2.23 (m, 1H), 2.17 – 2.11 (m, 1H), 2.01 – 1.92 (m, 3H), 1.86 – 1.81 (m, 1H), 1.76 – 1.68 (m, 2H), 1.68 – 1.60 (m, 2H) ppm. **<sup>13</sup>C NMR (126 MHz, CDCl<sub>3</sub>, mixture of diastereoisomers):**  $\delta = 202.3, 202.2, 173.7, 173.7, 159.8$  (2C), 141.9, 141.8, 138.7, 138.7, 130.1, 130.1, 128.9, 128.9, 128.6, 128.6, 128.4, 128.4, 128.1, 128.1, 128.0, 128.0, 127.6, 127.6, 126.1 (2C), 114.0 (2C), 66.7 (2C), 55.4 (2C), 49.4, 49.4, 48.2, 48.2, 37.9, 37.9, 36.0, 35.8, 32.9, 32.8, 30.9, 30.8 ppm.

**HRMS (ESI):** m/z calculated for [C<sub>28</sub>H<sub>30</sub>O<sub>4</sub>Na]<sup>+</sup> [M+Na]<sup>+</sup>: 453.2036; found: 453.2041.

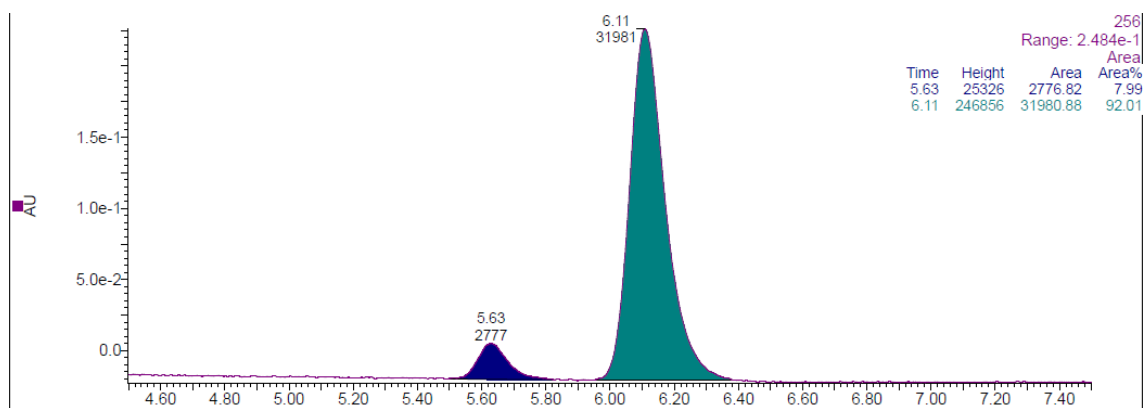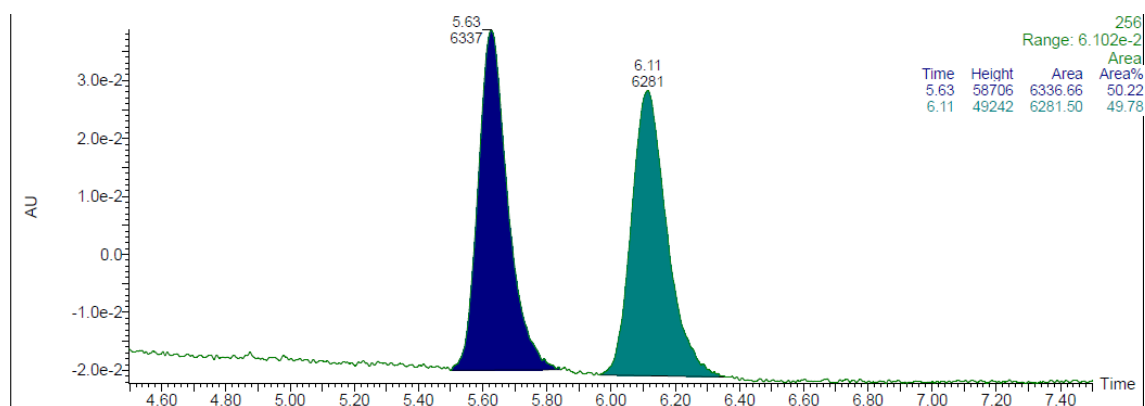

Supplementary Figure 38: UPC<sup>2</sup> traces of **6e**, diastereomer 1.

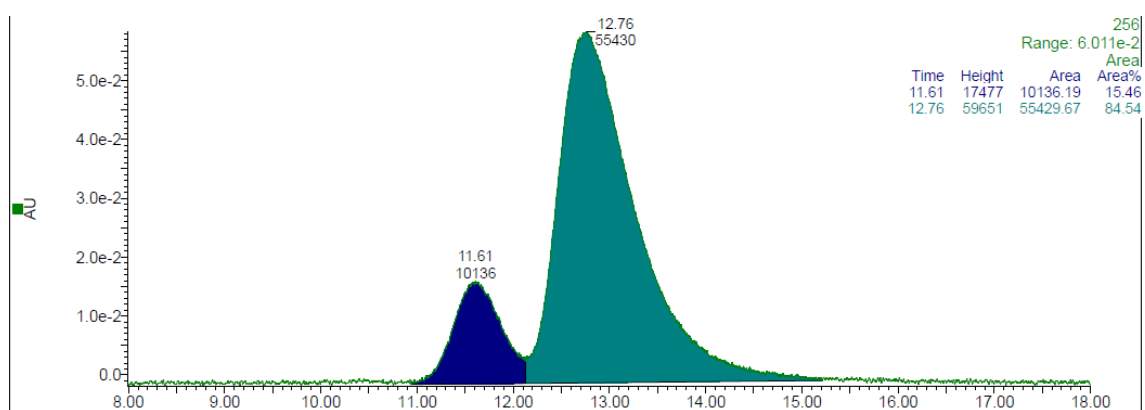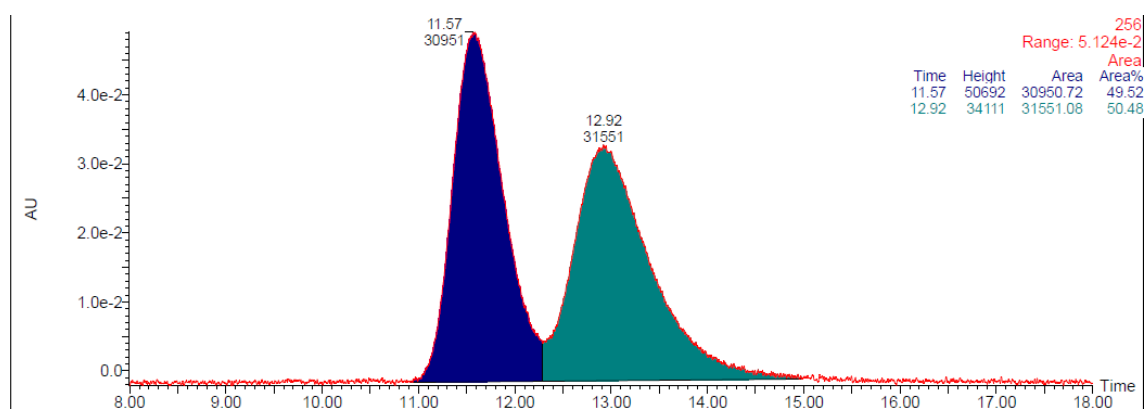

Supplementary Figure 39: UPC<sup>2</sup> traces of **6e**, diastereomer 2

#### 4-Methoxybenzyl (S)-4-(3-methoxyphenethyl)-6-oxo-2-phenylhexanoate (6f)

Following the general procedure E using acrylate **5a** (250  $\mu\text{mol}$ , 67.0 mg) and enal **1f** (750  $\mu\text{mol}$ , 143 mg), purification of the crude product by flash column chromatography (silica gel, 5-10% EtOAc in hexanes) and preparative thin layer chromatography (silica gel, DCM) afforded product **6f** as a pale yellow oil (62.0 mg, 54% yield) in a 1.1:1 diastereomeric ratio. The enantiomeric ratio of the corresponding 4-nitrobenzoate derivative, prepared following the general procedure, was determined to be 93.5:6.5 for *diastereomer 1* by UPC<sup>2</sup> analysis on a Daicel Chiralpak OJ-3 column (eluent: 100% CO<sub>2</sub> for 1 min, gradient 100% - 60% CO<sub>2</sub> in CH<sub>3</sub>CN for 5 min, 60% CO<sub>2</sub> in CH<sub>3</sub>CN for 2 min, gradient 60% - 100% CO<sub>2</sub> in CH<sub>3</sub>CN for 1 min; flow rate 2.0 mL/min,  $\lambda = 256$  nm)  $\tau_{\text{Major}} = 4.65$  min,  $\tau_{\text{Minor}} = 4.35$  min, and 84.5:15.5 for *diastereomer 2* by UPC<sup>2</sup> analysis on a Daicel Chiralpak IC-3 column (eluent: 100% CO<sub>2</sub> for 1 min, gradient 100% - 65% CO<sub>2</sub> in CH<sub>3</sub>CN for 5 min, 65% CO<sub>2</sub> in CH<sub>3</sub>CN for 2 min, gradient 65% - 100% CO<sub>2</sub> in CH<sub>3</sub>CN for 1 min; flow rate 2.0 mL/min,  $\lambda = 256$  nm)  $\tau_{\text{Major}} = 6.85$  min,  $\tau_{\text{Minor}} = 7.10$  min.

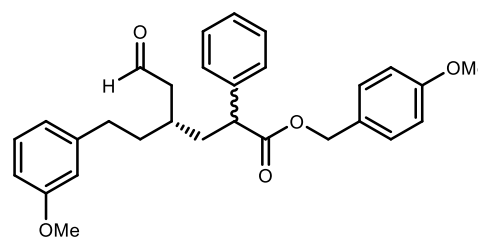

Chemical Formula: C<sub>29</sub>H<sub>32</sub>O<sub>5</sub>  
Molecular Weight: 460.57

$[\alpha]_{\text{D}}^{26} = -6.0$  (c = 1.0, CHCl<sub>3</sub>, 1.1:1 d.r., 93.5:6.5 e.r.<sup>1</sup>, 84.5:15.5 e.r.<sup>2</sup>).

**<sup>1</sup>H NMR (500 MHz, CDCl<sub>3</sub>, mixture of diastereoisomers):**  $\delta = 9.63$  (t,  $J = 2.3$  Hz, 1H), 9.60 (t,  $J = 2.1$  Hz, 1H), 7.36 – 7.25 (m, 10H), 7.22 – 7.15 (m, 6H), 6.88 – 6.81 (m, 4H), 6.76 – 6.64 (m, 6H), 5.08 (d,  $J = 12.0$  Hz, 1H), 5.08 (d,  $J = 12.0$  Hz, 1H), 4.99 (d,  $J = 12.0$  Hz, 1H), 4.98 (d,  $J = 12.0$  Hz, 1H), 3.80 (s, 6H), 3.79 (s, 3H), 3.78 (s, 3H), 3.72 – 3.63 (m, 2H), 2.61 – 2.48 (m, 4H), 2.42 – 2.33 (m, 4H), 2.28 – 2.19 (m, 1H), 2.16 – 2.08 (m, 1H), 1.99 – 1.89 (m, 3H), 1.85 – 1.76 (m, 1H), 1.73 – 1.58 (m, 4H) ppm. **<sup>13</sup>C NMR (126 MHz, CDCl<sub>3</sub>, mixture of diastereoisomers):**  $\delta = 202.3$ , 202.1, 173.6, 173.6, 159.8 (2C), 159.7 (2C), 143.5, 143.4, 138.7 (2C), 130.1, 130.0, 129.5, 129.5, 128.9, 128.8, 128.1, 128.0, 128.0, 128.0, 127.6, 127.6, 120.8, 120.8, 114.2, 114.1, 114.0 (2C), 111.4, 111.3, 66.6 (2C), 55.4 (2C), 55.2 (2C), 49.4, 49.3, 48.1, 48.1, 37.9, 37.8, 35.8, 35.7, 32.9, 32.9, 30.9, 30.7 ppm.

**HRMS (ESI):** m/z calculated for [C<sub>29</sub>H<sub>32</sub>O<sub>5</sub>Na]<sup>+</sup> [M+Na]<sup>+</sup>: 483.2142; found: 483.2153.



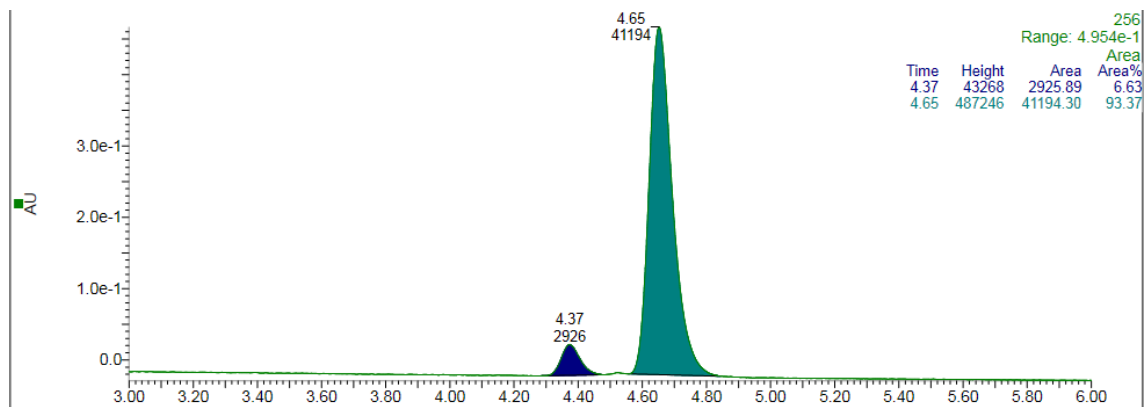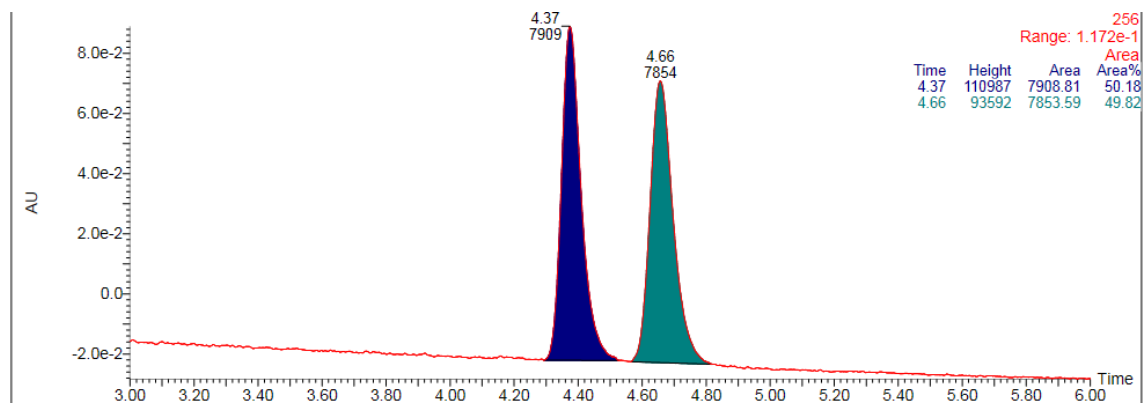

Supplementary Figure 40: UPC<sup>2</sup> traces of **6f**, diastereomer 1

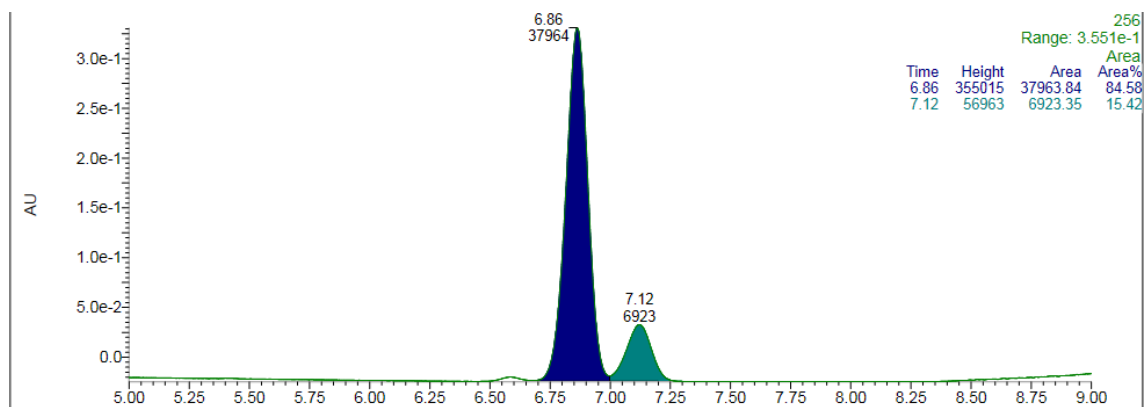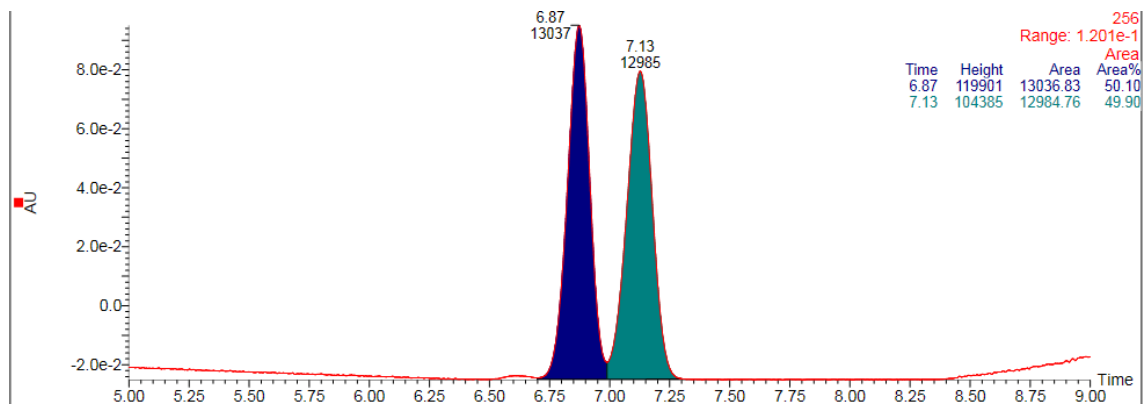

Supplementary Figure 41: UPC<sup>2</sup> traces of **6f**, diastereomer 2

#### 4-Methoxybenzyl (S)-6-oxo-2-phenyl-4-(3-(trifluoromethyl)phenethyl)hexanoate (6g)

Following the general procedure E using acrylate 5a (250  $\mu\text{mol}$ , 67.0 mg) and enal 1g (750  $\mu\text{mol}$ , 171 mg), purification of the crude product by flash column chromatography (silica gel, 5-10% EtOAc in hexanes) and preparative thin layer chromatography (silica gel, DCM) afforded product 6g as a pale yellow oil (68.0 mg, 55% yield) in a 1.1:1 diastereomeric ratio. The enantiomeric ratio of the corresponding 4-nitrobenzoate derivative, prepared following the general procedure, was determined to be

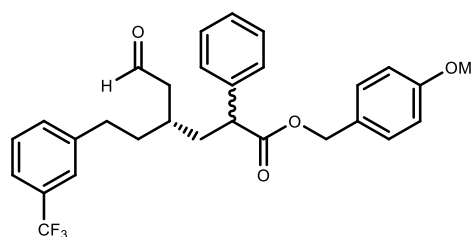

Chemical Formula:  $\text{C}_{29}\text{H}_{29}\text{F}_3\text{O}_4$   
Molecular Weight: 498.54

92.5:7.5 for *diastereomer 1* by UPC<sup>2</sup> analysis on a Daicel Chiralpak OJ-3 column (eluent: 100%  $\text{CO}_2$  for 1 min, gradient 100% - 60%  $\text{CO}_2$  in  $\text{CH}_3\text{CN}$  for 5 min, 60%  $\text{CO}_2$  in  $\text{CH}_3\text{CN}$  for 2 min, gradient 60% - 100%  $\text{CO}_2$  in  $\text{CH}_3\text{CN}$  for 1 min; flow rate 2.0 mL/min,  $\lambda = 256$  nm)  $\tau_{\text{Major}} = 3.55$  min,  $\tau_{\text{Minor}} = 3.25$  min, and 83.5:16.5 for *diastereomer 2* by UPC<sup>2</sup> analysis on a Daicel Chiralpak IE-3 column (eluent: 100%  $\text{CO}_2$  for 1 min, gradient 100% - 80%  $\text{CO}_2$  in MeOH for 38 min, 80%  $\text{CO}_2$  in MeOH for 5 min, gradient 80% - 100%  $\text{CO}_2$  in MeOH for 1 min; flow rate 2.0 mL/min,  $\lambda = 256$  nm)  $\tau_{\text{Major}} = 31.35$  min,  $\tau_{\text{Minor}} = 30.75$  min.

$[\alpha]_{\text{D}}^{26} = -4.6$  (c = 1.0,  $\text{CHCl}_3$ , 1.1:1 d.r., 92.5:7.5 e.r.<sup>1</sup>, 83.5:16.5 e.r.<sup>2</sup>).

**<sup>1</sup>H NMR (400 MHz,  $\text{CDCl}_3$ , mixture of diastereoisomers):**  $\delta = 9.65$  (t,  $J = 2.1$  Hz, 1H), 9.63 (t,  $J = 2.0$  Hz, 1H), 7.48 – 7.40 (m, 2H), 7.41 – 7.22 (m, 16H), 7.22 – 7.15 (m, 4H), 6.87 – 6.80 (m, 4H), 5.09 (d,  $J = 12.0$  Hz, 1H), 5.08 (d,  $J = 12.0$  Hz, 1H), 4.99 (d,  $J = 12.0$  Hz, 1H), 4.98 (d,  $J = 12.0$  Hz, 1H), 3.79 (s, 3H), 3.78 (s, 3H), 3.70 – 3.63 (m, 2H), 2.67 – 2.51 (m, 4H), 2.48 – 2.34 (m, 4H), 2.31 – 2.22 (m, 1H), 2.16 – 2.07 (m, 1H), 2.02 – 1.87 (m, 3H), 1.85 – 1.77 (m, 1H), 1.70 – 1.57 (m, 4H) ppm.

**<sup>13</sup>C NMR (101 MHz,  $\text{CDCl}_3$ , mixture of diastereoisomers):**  $\delta = 201.9$ , 201.8, 173.6, 173.5, 159.8 (2C), 142.8, 142.7, 138.6, 138.5, 131.8 (q,  $J = 1.1$  Hz), 131.8 (q,  $J = 1.1$  Hz), 130.8 (q,  $J = 31.9$  Hz), 130.8 (q,  $J = 32.0$  Hz), 130.1, 130.1, 129.0, 128.9, 128.9, 128.9, 128.0, 128.0, 128.0, 127.7, 127.6, 125.1 (q,  $J = 3.7$  Hz), 125.0 (q,  $J = 3.7$  Hz), 124.3 (q,  $J = 272.4$  Hz, 2C), 123.0 (q,  $J = 3.9$  Hz, 2C), 114.0 (2C), 66.7 (2C), 55.4, 55.4, 49.4, 49.4, 48.1 (2C), 37.8, 37.69, 35.8, 35.7, 32.7, 32.7, 30.8, 30.8 ppm.

**<sup>19</sup>F NMR (376 MHz,  $\text{CDCl}_3$ , mixture of diastereoisomers):**  $\delta = -62.59$  ppm.

**HRMS (ESI):** m/z calculated for  $[\text{C}_{29}\text{H}_{29}\text{F}_3\text{O}_4\text{Na}]^+$   $[\text{M}+\text{Na}]^+$ : 521.1910; found: 521.1908.

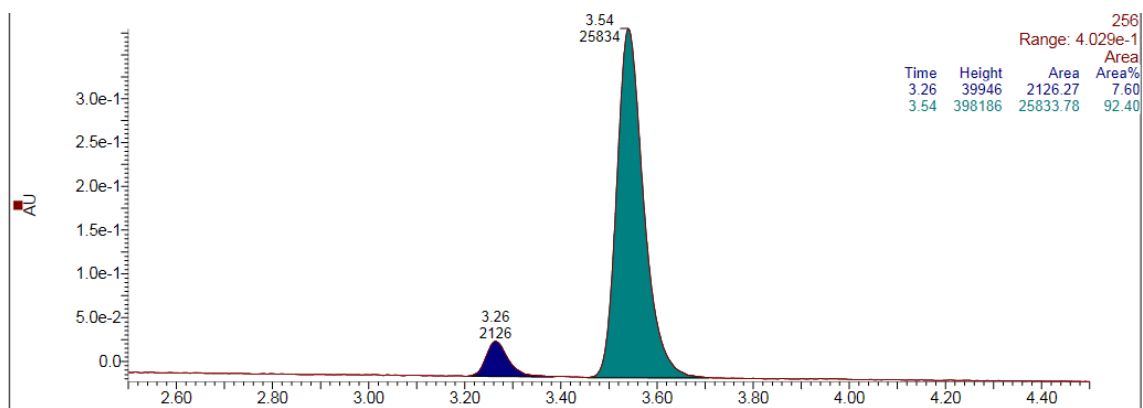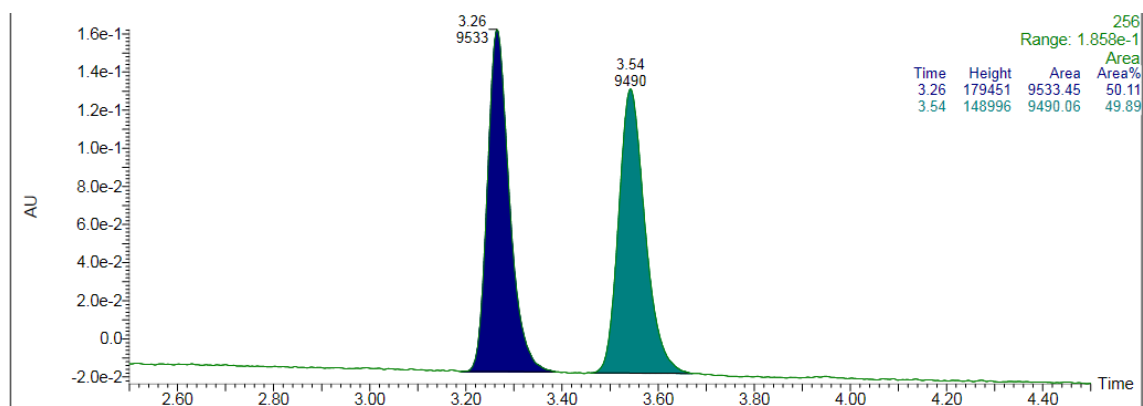

Supplementary Figure 42: UPC<sup>2</sup> traces of **6g**, diastereomer 1.

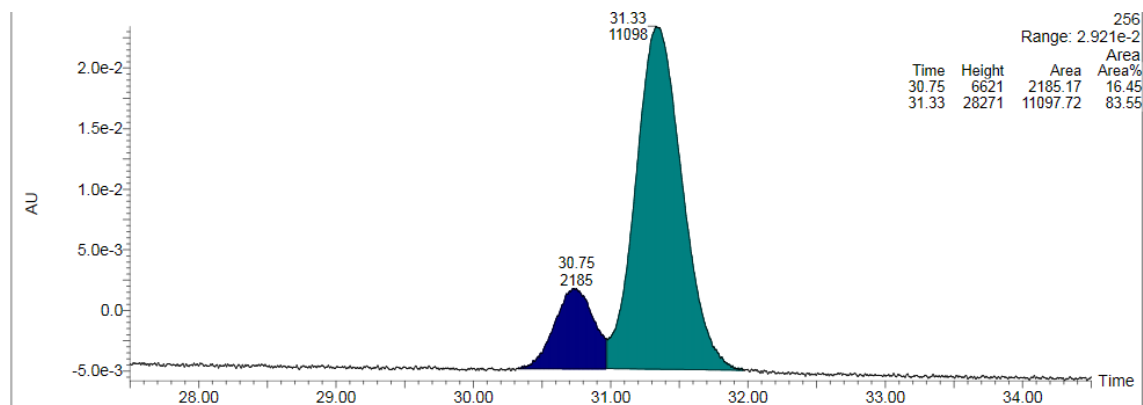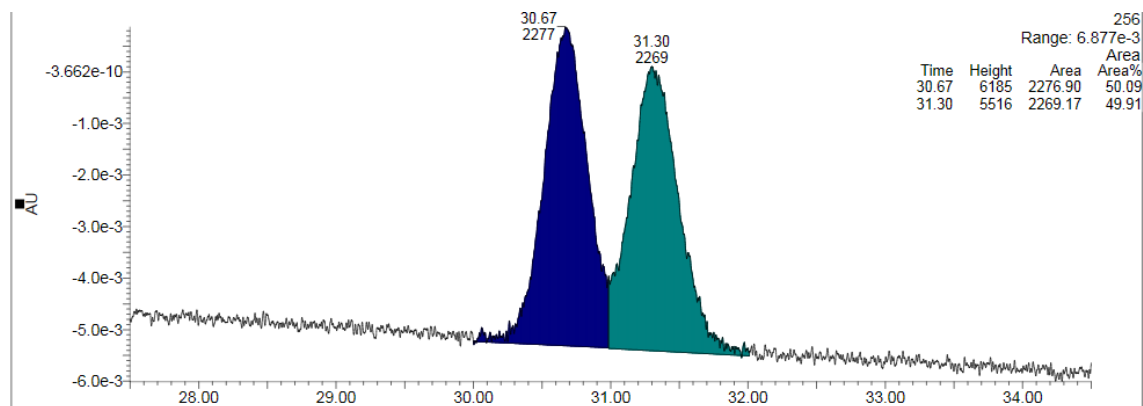

Supplementary Figure 43: UPC<sup>2</sup> traces of **6g**, diastereomer 2

#### 4-Methoxybenzyl (S)-4-(4-bromophenethyl)-6-oxo-2-phenylhexanoate (6h)

Following the general procedure E using acrylate **5a** (250  $\mu$ mol, 67.0 mg) and enal **1h** (750  $\mu$ mol, 179 mg), purification of the crude product by flash column chromatography (silica gel, 5-10% EtOAc in hexanes) and preparative thin layer chromatography (silica gel, DCM) afforded product **6h** as a pale yellow oil (68.0 mg, 53% yield) in a 1.1:1 diastereomeric ratio. The enantiomeric ratio of the corresponding 4-nitrobenzoate

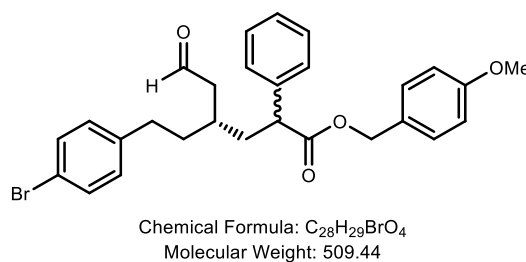

derivative, prepared following the general procedure, was determined to be 92.5:7.5 for *diastereomer 1* by UPC<sup>2</sup> analysis on a Daicel Chiralpak OJ-3 column (eluent: 100% CO<sub>2</sub> for 1 min, gradient 100% - 60% CO<sub>2</sub> in CH<sub>3</sub>CN for 5 min, 60% CO<sub>2</sub> in CH<sub>3</sub>CN for 2 min, gradient 60% - 100% CO<sub>2</sub> in CH<sub>3</sub>CN for 1 min; flow rate 2.0 mL/min,  $\lambda$  = 256 nm)  $\tau_{Major}$  = 4.70 min,  $\tau_{Minor}$  = 4.40 min, and 84:16 for *diastereomer 2* by UPC<sup>2</sup> analysis on a Daicel Chiralpak IC-3 column (eluent: 100% CO<sub>2</sub> for 1 min, gradient 100% - 70% CO<sub>2</sub> in CH<sub>3</sub>CN for 5 min, 70% CO<sub>2</sub> in CH<sub>3</sub>CN for 2 min, gradient 70% - 100% CO<sub>2</sub> in CH<sub>3</sub>CN for 1 min; flow rate 2.0 mL/min,  $\lambda$  = 256 nm)  $\tau_{Major}$  = 7.05 min,  $\tau_{Minor}$  = 7.30 min.

$[\alpha]_D^{26}$  = -9.0 (c = 1.0, CHCl<sub>3</sub>, 1.1:1 d.r., 92.5:7.5 e.r.<sup>1</sup>, 84:16 e.r.<sup>2</sup>).

**<sup>1</sup>H NMR (500 MHz, CDCl<sub>3</sub>, mixture of diastereoisomers):**  $\delta$  = 9.62 (t,  $J$  = 2.2 Hz, 1H), 9.59 (t,  $J$  = 2.1 Hz, 1H), 7.40 – 7.36 (m, 2H), 7.36 – 7.34 (m, 2H), 7.33 – 7.23 (m, 10H), 7.20 – 7.15 (m, 4H), 7.00 – 6.96 (m, 2H), 6.94 – 6.89 (m, 2H), 6.86 – 6.82 (m, 4H), 5.08 (d,  $J$  = 12.0 Hz, 1H), 5.07 (d,  $J$  = 12.0 Hz, 1H), 4.98 (d,  $J$  = 12.0 Hz, 1H), 4.97 (d,  $J$  = 12.0 Hz, 1H), 3.79 (s, 3H), 3.79 (s, 3H), 3.68 – 3.60 (m, 2H), 2.56 – 2.43 (m, 4H), 2.42 – 2.33 (m, 4H), 2.26 – 2.18 (m, 1H), 2.13 – 2.05 (m, 1H), 1.98 – 1.92 (m, 1H), 1.92 – 1.85 (m, 2H), 1.82 – 1.76 (m, 1H), 1.66 – 1.54 (m, 4H) ppm. **<sup>13</sup>C NMR (126 MHz, CDCl<sub>3</sub>, mixture of diastereoisomers):**  $\delta$  = 202.1, 202.0, 173.6, 173.6, 159.7 (2C), 140.8, 140.7, 138.6 (2C), 131.6, 131.5, 130.2, 130.1, 130.1, 130.1, 128.9, 128.9, 128.0, 128.0, 128.0, 127.9, 127.6, 127.6, 119.8, 119.7, 114.0 (2C), 66.7 (2C), 55.4 (2C), 49.4, 49.3, 48.1, 48.1, 37.8, 37.7, 35.7, 35.6, 32.2, 32.2, 30.6, 30.5 ppm.

**HRMS (ESI):** m/z calculated for [C<sub>28</sub>H<sub>29</sub>BrO<sub>4</sub>Na]<sup>+</sup> [M+Na]<sup>+</sup>: 531.1141; found: 531.1141.

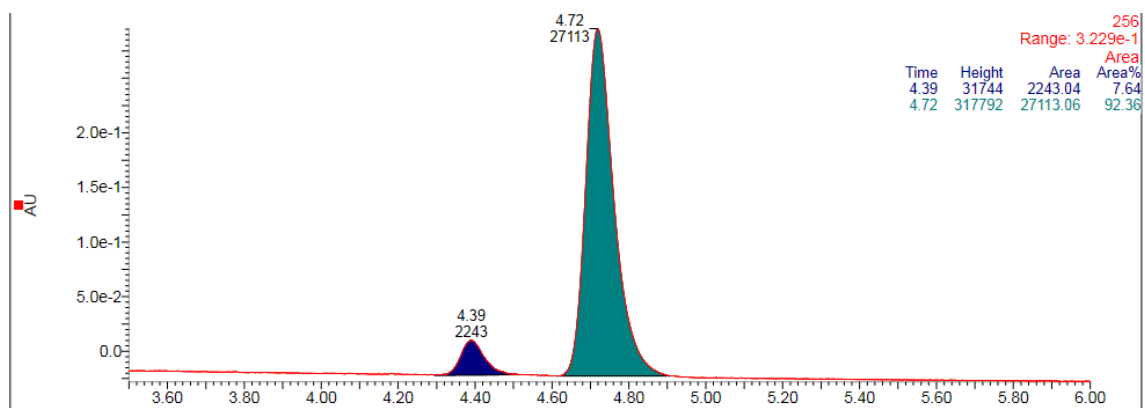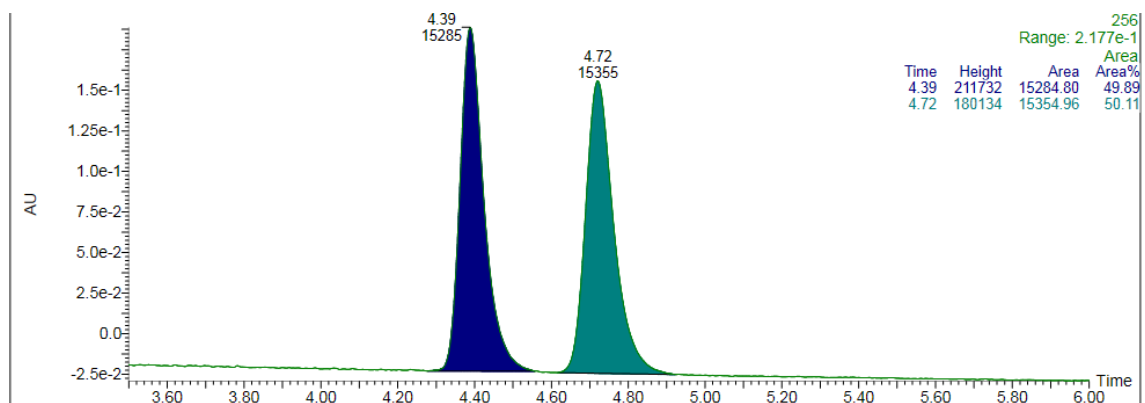

Supplementary Figure 44: UPC<sup>2</sup> traces of **6h**, diastereomer 1.

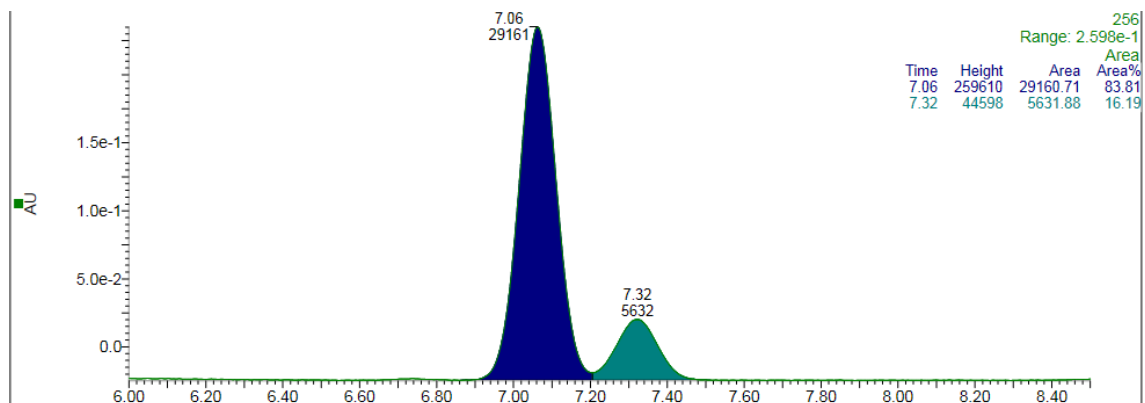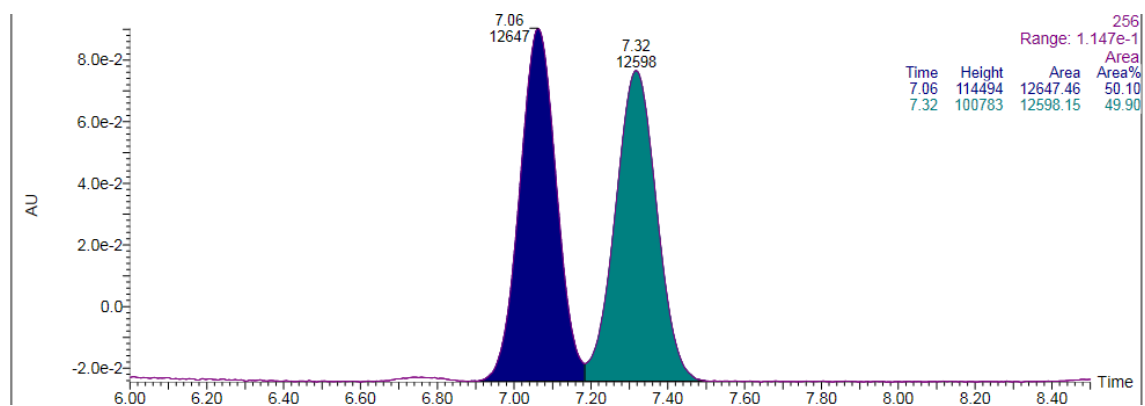

Supplementary Figure 45: UPC<sup>2</sup> traces of **6h**, diastereomer 2.

#### 4-Methoxybenzyl (S)-4-(2-oxoethyl)-2-phenylnon-8-enoate (**6i**)

Following the general procedure E using acrylate **5a** (250  $\mu$ mol, 67.0 mg) and enal **1i** (750  $\mu$ mol, 93.0 mg), purification of the crude product by flash column chromatography (silica gel, 5-10% EtOAc in hexanes) afforded product **6i** as a pale yellow oil (81.0 mg, 82% yield) in a 1.2:1 diastereomeric ratio. The enantiomeric ratio of the corresponding 4-nitrobenzoate derivative, prepared following the general procedure, was determined to be 94.5:5.5 for *diastereomer 1* by UPC<sup>2</sup> analysis on a Daicel Chiralpak OJ-3 column (eluent: 100% CO<sub>2</sub> for 1 min, gradient 100% - 85% CO<sub>2</sub> in CH<sub>3</sub>CN for 8 min, 85% CO<sub>2</sub> in CH<sub>3</sub>CN for 4 min, gradient 85% - 100% CO<sub>2</sub> in CH<sub>3</sub>CN for 2 min; flow rate 2.0 mL/min,  $\lambda$  = 300 nm)  $\tau_{Major}$  = 4.85 min,  $\tau_{Minor}$  = 4.55 min, and 86.5:13.5 for *diastereomer 2* by UPC<sup>2</sup> analysis on a Daicel Chiralpak ID-3 column (eluent: 100% CO<sub>2</sub> for 1 min, gradient 100% - 60% CO<sub>2</sub> in CH<sub>3</sub>CN for 5 min, 60% CO<sub>2</sub> in CH<sub>3</sub>CN for 2 min, gradient 60% - 100% CO<sub>2</sub> in CH<sub>3</sub>CN for 1 min; flow rate 2.0 mL/min,  $\lambda$  = 256 nm)  $\tau_{Major}$  = 5.65 min,  $\tau_{Minor}$  = 5.45 min.

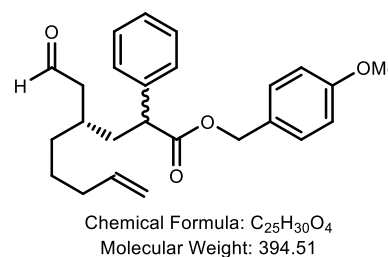

$[\alpha]_D^{26} = -7.4$  ( $c = 1.0$ , CHCl<sub>3</sub>, 1.2:1 d.r., 94.5:5.5 e.r.<sup>1</sup>, 86.5:13.5 e.r.<sup>2</sup>).

**<sup>1</sup>H NMR (500 MHz, CDCl<sub>3</sub>, mixture of diastereoisomers):**  $\delta = 9.63$  (t,  $J = 2.3$  Hz, 1H), 9.61 (t,  $J = 2.2$  Hz, 1H), 7.34 – 7.25 (m, 10H), 7.22 – 7.16 (m, 4H), 6.88 – 6.82 (m, 4H), 5.80 – 5.69 (m, 2H), 5.08 (d,  $J = 12.0$  Hz, 1H), 5.08 (d,  $J = 12.0$  Hz, 1H), 5.00 – 4.92 (m, 6H), 3.79 (s, 6H), 3.69 – 3.63 (m, 2H), 2.38 – 2.27 (m, 4H), 2.18 – 2.12 (m, 1H), 2.07 – 2.03 (m, 1H), 2.01 – 1.93 (m, 4H), 1.90 – 1.80 (m, 3H), 1.76 (dd,  $J = 13.9, 7.0$  Hz, 1H), 1.37 – 1.27 (m, 8H) ppm. **<sup>13</sup>C NMR (126 MHz, CDCl<sub>3</sub>, mixture of diastereoisomers):**  $\delta = 202.5, 202.4, 173.7, 173.7, 159.7$  (2C), 138.8, 138.7, 138.5, 138.5, 130.1, 130.1, 128.9, 128.8, 128.1 (2C), 128.0 (2C), 127.6, 114.9, 114.0, 114.0, 66.6, 55.4, 49.4, 49.4, 48.2, 48.2, 37.9, 33.8, 33.8, 33.5, 33.3, 30.9, 30.9, 25.7, 25.6 ppm.

**HRMS (ESI):**  $m/z$  calculated for [C<sub>25</sub>H<sub>30</sub>O<sub>4</sub>Na]<sup>+</sup> [M+Na]<sup>+</sup>: 417.2036; found: 417.2034.

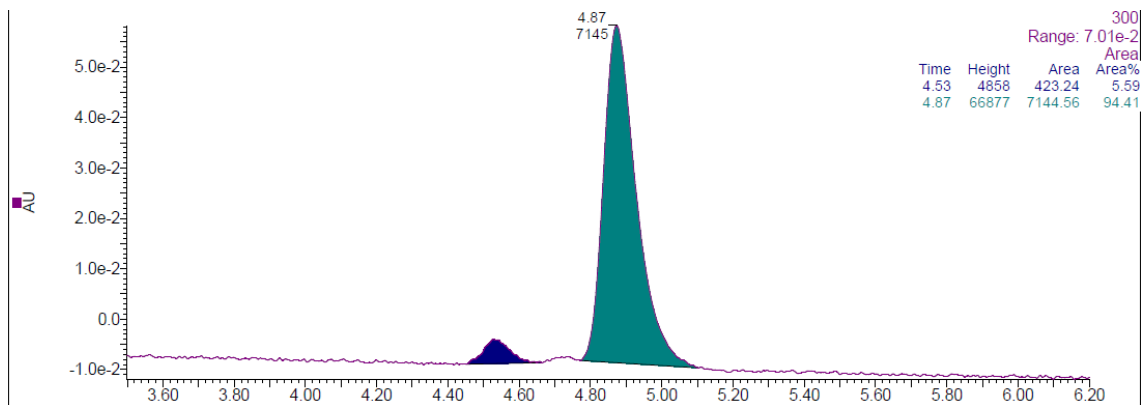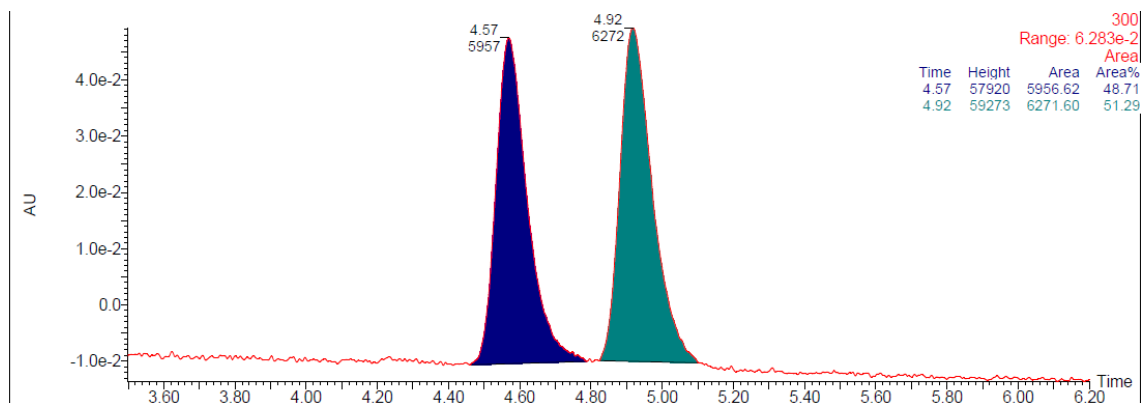

Supplementary Figure 46: UPC<sup>2</sup> traces of **6i**, diastereomer 1.

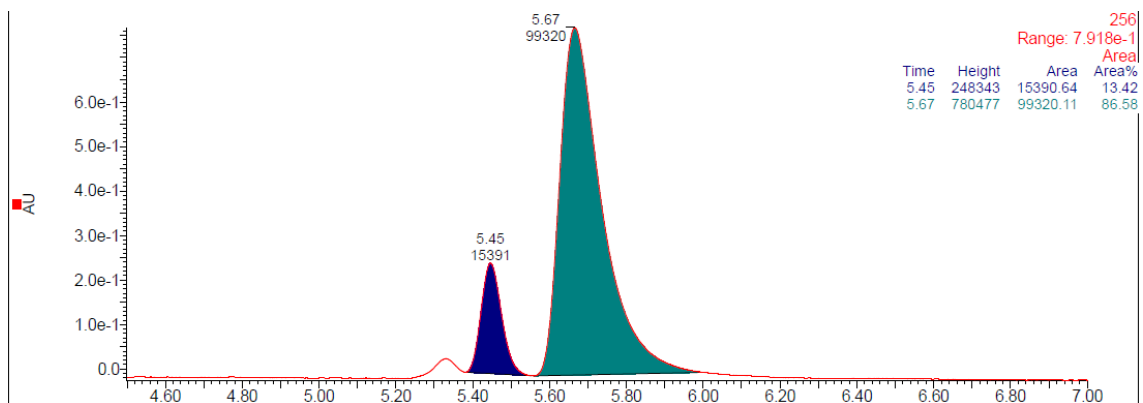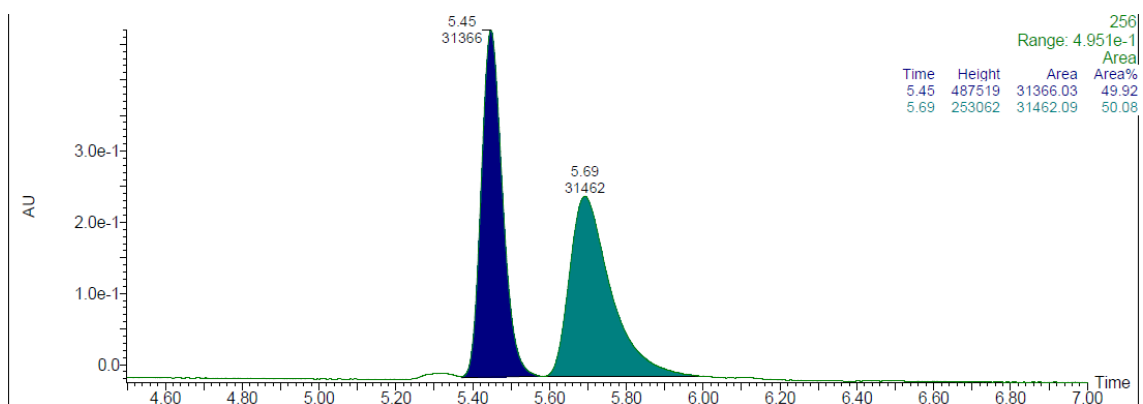

Supplementary Figure 47: UPC<sup>2</sup> traces of **6i**, diastereomer 2.

#### 4-Methoxybenzyl (4*S*,6*S*)-6,10-dimethyl-4-(2-oxoethyl)-2-phenylundec-9-enoate (**6j**)

Following the general procedure **E** using acrylate **5a** (250  $\mu\text{mol}$ , 67.0 mg) and enal **1j** (750  $\mu\text{mol}$ , 135 mg), purification of the crude product by flash column chromatography (silica gel, 5-10% EtOAc in hexanes) afforded product **6j** as a pale yellow oil (75.0 mg, 67% yield) in a 1.6:1 diastereomeric ratio. The enantiomeric ratio of the corresponding 4-nitrobenzoate derivative, prepared following the general procedure, was determined to be 86:14 for *diastereomer 1* by UPC<sup>2</sup> analysis on a Daicel Chiralpak OJ-3 column (eluent: 100% CO<sub>2</sub> for 1 min, gradient 100% - 80% CO<sub>2</sub> in iPrOH for 8 min, 80% CO<sub>2</sub> in iPrOH for 4 min, gradient 80% - 100% CO<sub>2</sub> in iPrOH for 2 min; flow rate 2.0 mL/min,  $\lambda = 256$  nm)  $\tau_{\text{Major}} = 4.60$  min,  $\tau_{\text{Minor}} = 4.20$  min, and 88.5:11.5 for *diastereomer 2* by UPC<sup>2</sup> analysis on a Daicel Chiralpak IB-3 column (eluent: 100% CO<sub>2</sub> for 1 min, gradient 100% - 80% CO<sub>2</sub> in iPrOH for 8 min, 80% CO<sub>2</sub> in iPrOH for 4 min, gradient 80% - 100% CO<sub>2</sub> in iPrOH for 2 min; flow rate 2.0 mL/min,  $\lambda = 256$  nm)  $\tau_{\text{Major}} = 7.05$  min,  $\tau_{\text{Minor}} = 7.20$  min.

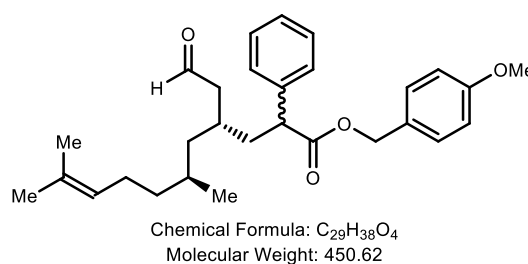

$[\alpha]_{\text{D}}^{26} = -2.3$  (c = 1.0, CHCl<sub>3</sub>, 1.6:1 d.r., 86:14 e.r.<sup>1</sup>, 88.5:11.5 e.r.<sup>2</sup>).

**<sup>1</sup>H NMR (400 MHz, CDCl<sub>3</sub>, mixture of diastereoisomers):**  $\delta = 9.65 - 9.57$  (m, 2H), 7.34 - 7.24 (m, 10H), 7.24 - 7.16 (m, 4H), 6.87 - 6.80 (m, 4H), 5.14 - 4.93 (m, 6H), 3.79 (s, 6H), 3.70 - 3.63 (m, 2H), 2.41 - 2.29 (m, 2H), 2.29 - 2.18 (m, 3H), 1.99 - 1.86 (m, 7H), 1.68 (dt,  $J = 4.3, 1.3$  Hz, 6H), 1.67 - 1.61 (m, 2H), 1.59 (dd,  $J = 8.0, 1.3$  Hz, 6H), 1.44 (dt,  $J = 9.5, 7.1$  Hz, 2H), 1.36 - 1.28 (m, 2H), 1.22 - 1.16 (m, 2H), 1.11 - 0.97 (m, 4H), 0.85 (d,  $J = 6.5$  Hz, 3H), 0.71 (d,  $J = 6.5$  Hz, 3H) ppm. **<sup>13</sup>C NMR (101 MHz, CDCl<sub>3</sub>, mixture of diastereoisomers):**  $\delta = 202.6, 202.5, 173.8, 173.6, 159.7, 159.7, 139.0, 138.6, 131.4, 131.4, 130.1, 130.0, 128.9, 128.8, 128.1, 128.0, 128.0$  (2C), 127.6, 127.5, 124.8, 124.7, 114.0, 114.0, 66.6 (2C), 55.4, 55.4, 49.4, 49.3, 48.8, 48.7, 42.4, 42.3, 38.2, 37.8, 37.2, 37.2, 29.8, 29.7, 28.9, 28.6, 25.8, 25.8, 25.5, 25.5, 19.8, 19.6, 17.8, 17.8 ppm.

**HRMS (ESI):** m/z calculated for [C<sub>29</sub>H<sub>38</sub>O<sub>4</sub>Na]<sup>+</sup> [M+Na]<sup>+</sup>: 473.2662; found: 473.2660.



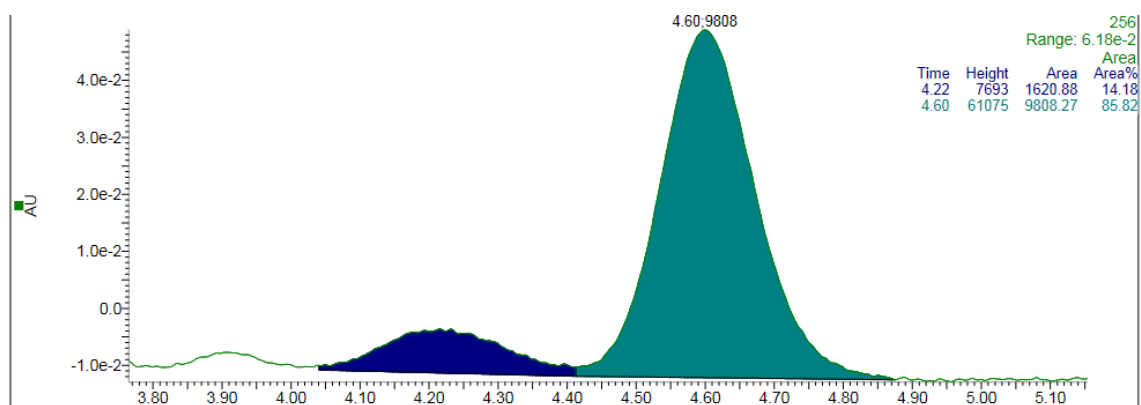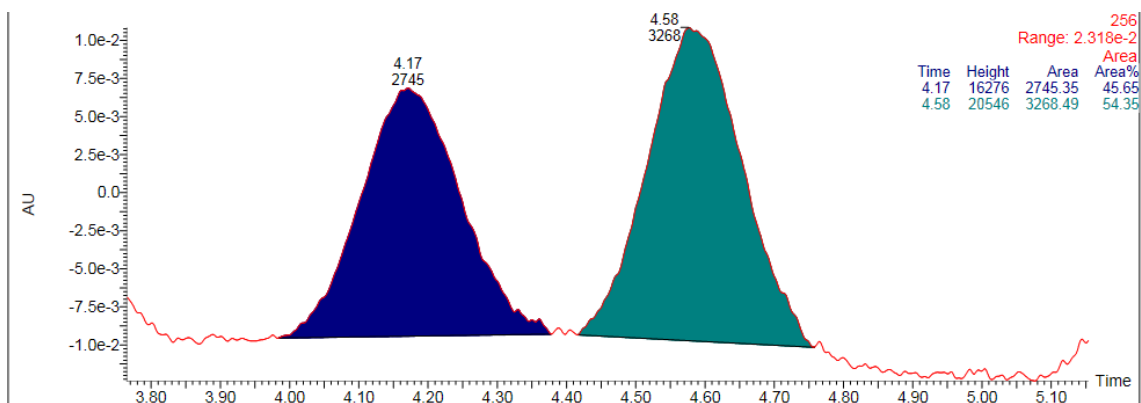

Supplementary Figure 48: UPC<sup>2</sup> traces of **6j**, diastereomer 1

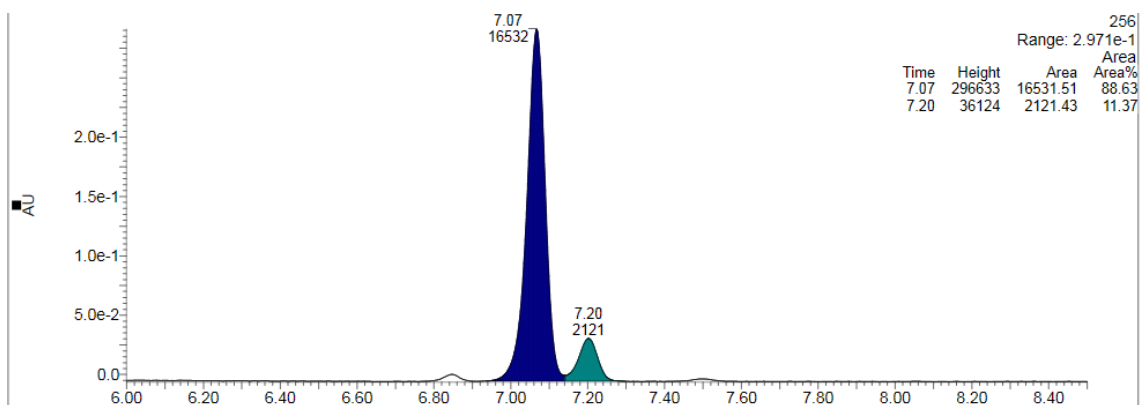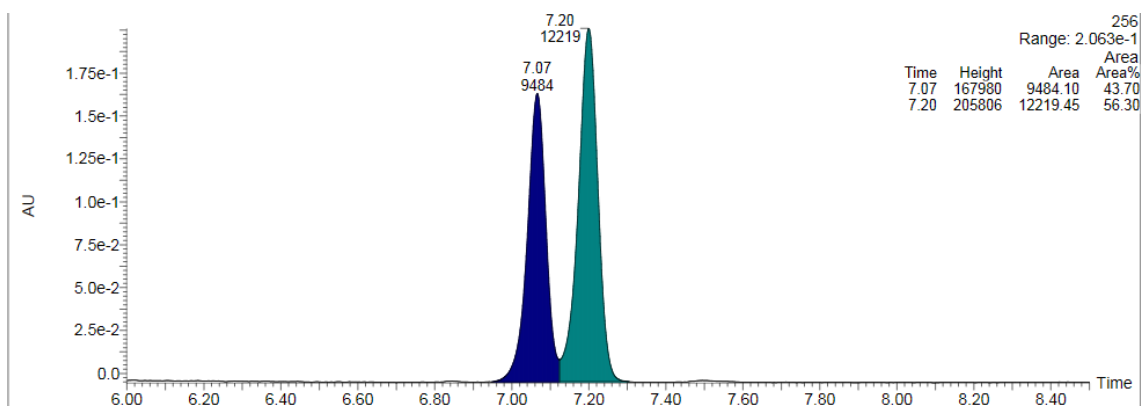

Supplementary Figure 49: UPC<sup>2</sup> traces of **6j**, diastereomer 2

#### 4-Methoxybenzyl (*S,Z*)-4-(2-oxoethyl)-2-phenyldec-7-enoate (**6k**)

Following the general procedure E using acrylate **5a** (250  $\mu\text{mol}$ , 67.0 mg) and enal **1k** (750  $\mu\text{mol}$ , 109 mg, 126  $\mu\text{L}$ ), purification of the crude product by flash column chromatography (silica gel, 5-10% EtOAc in hexanes) afforded product **6k** as a pale yellow oil (87.0 mg, 85% yield) in a 1:1 diastereomeric ratio. The enantiomeric ratio of the corresponding 4-nitrobenzoate derivative, prepared following the general procedure, was determined to be 94:6 for *diastereomer 1* by UPC<sup>2</sup> analysis on a Daicel Chiralpak OJ-3 column (eluent: 100% CO<sub>2</sub> for 1 min, gradient 100% - 85% CO<sub>2</sub> in CH<sub>3</sub>CN for 8 min, 85% CO<sub>2</sub> in CH<sub>3</sub>CN for 4 min, gradient 85% - 100% CO<sub>2</sub> in CH<sub>3</sub>CN for 2 min; flow rate 2.0 mL/min,  $\lambda = 256$  nm)  $\tau_{\text{Major}} = 4.75$  min,  $\tau_{\text{Minor}} = 4.40$  min, and 88.5:11.5 for *diastereomer 2* by UPC<sup>2</sup> analysis on a Daicel Chiralpak ID-3 column (eluent: 100% CO<sub>2</sub> for 1 min, gradient 100% - 80% CO<sub>2</sub> in CH<sub>3</sub>CN for 5 min, 80% CO<sub>2</sub> in CH<sub>3</sub>CN for 2 min, gradient 80% - 100% CO<sub>2</sub> in CH<sub>3</sub>CN for 1 min; flow rate 2.0 mL/min,  $\lambda = 256$  nm)  $\tau_{\text{Major}} = 8.15$  min,  $\tau_{\text{Minor}} = 7.80$  min.

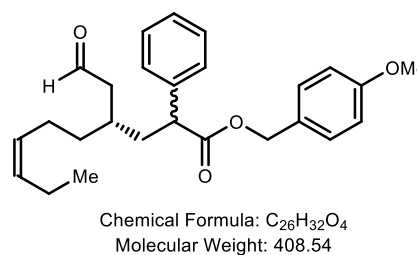

$[\alpha]_{\text{D}}^{26} = -5.6$  (c = 1.0, CHCl<sub>3</sub>, 1:1 d.r., 94:6 e.r.<sup>1</sup>, 88.5:11.5 e.r.<sup>2</sup>).

**<sup>1</sup>H NMR (500 MHz, CDCl<sub>3</sub>, mixture of diastereoisomers):**  $\delta = 9.63$  (t,  $J = 2.3$  Hz, 1H), 9.60 (t,  $J = 2.2$  Hz, 1H), 7.34 – 7.25 (m, 10H), 7.22 – 7.17 (m, 4H), 6.86 – 6.82 (m, 4H), 5.40 – 5.30 (m, 2H), 5.27 – 5.15 (m, 2H), 5.09 (d,  $J = 12.0$  Hz, 1H), 5.08 (d,  $J = 12.0$  Hz, 1H), 4.98 (d,  $J = 12.0$  Hz, 1H), 4.97 (d,  $J = 12.0$  Hz, 1H), 3.79 (s, 6H), 3.70 – 3.64 (m, 2H), 2.37 – 2.27 (m, 4H), 2.20 – 2.14 (m, 1H), 2.09 – 2.05 (m, 1H), 2.01 – 1.93 (m, 8H), 1.90 – 1.84 (m, 3H), 1.81 – 1.75 (m, 1H), 1.45 – 1.38 (m, 2H), 1.37 – 1.30 (m, 2H), 0.94 (td,  $J = 7.5, 1.7$  Hz, 6H) ppm. **<sup>13</sup>C NMR (126 MHz, CDCl<sub>3</sub>, mixture of diastereoisomers):**  $\delta = 202.5, 202.3, 173.7$  (2C), 159.7 (2C), 138.8, 138.7, 132.4 (2C), 130.0, 130.0, 128.9, 128.8, 128.2, 128.2, 128.1 (2C), 128.0 (2C), 127.5 (2C), 114.0 (2C), 66.6 (2C), 55.4 (2C), 49.4, 49.3, 48.1, 48.1, 37.9, 37.9, 34.1, 33.9, 30.8, 30.7, 24.1, 24.0, 20.6 (2C), 14.4 (2C) ppm.

**HRMS (ESI):** m/z calculated for [C<sub>26</sub>H<sub>32</sub>O<sub>4</sub>Na]<sup>+</sup> [M+Na]<sup>+</sup>: 431.2193; found: 431.2192.

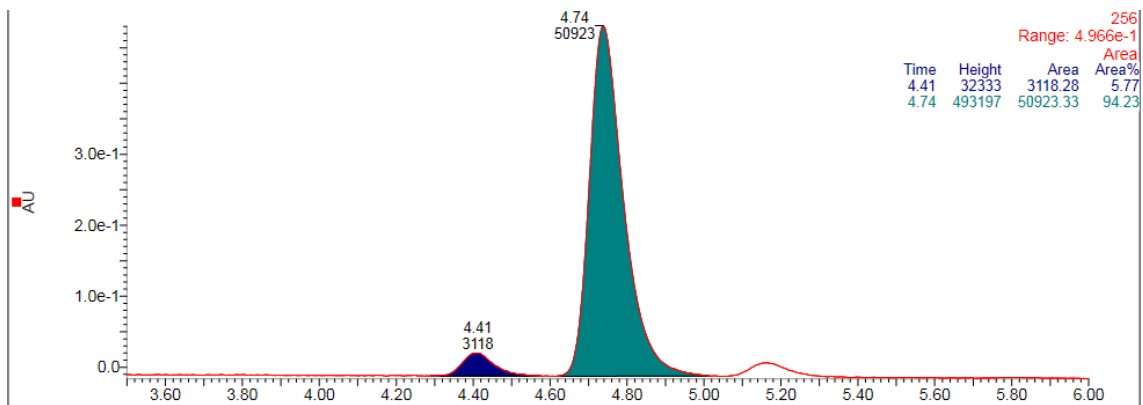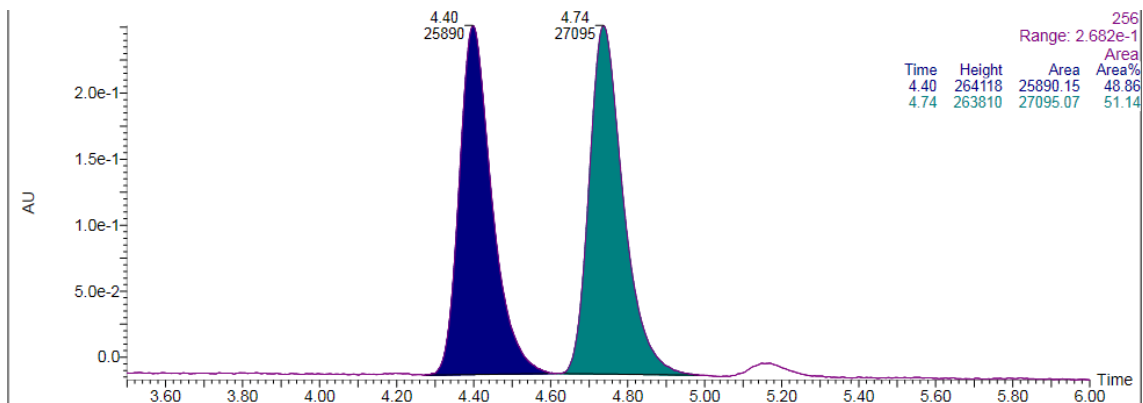

Supplementary Figure 50: UPC<sup>2</sup> traces of **6k**, diastereomer 1.

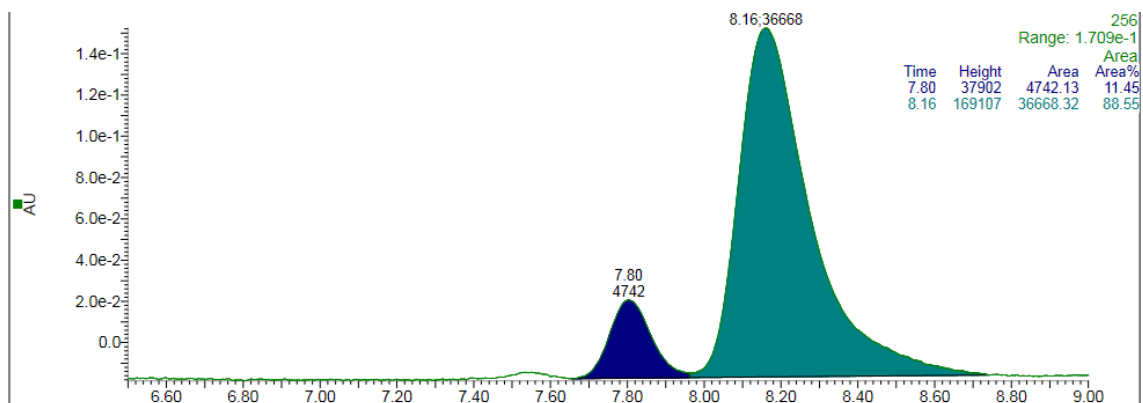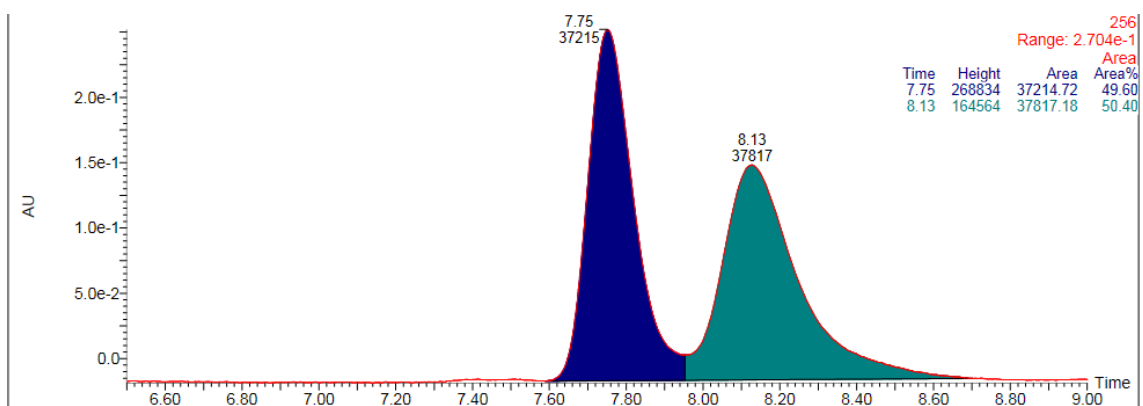

Supplementary Figure 51: UPC<sup>2</sup> traces of **6k**, diastereomer 2

#### 4-Methoxybenzyl (S)-10-chloro-4-(2-oxoethyl)-2-phenyldecanoate (**6l**)

Following the general procedure E using acrylate **5a** (250  $\mu\text{mol}$ , 67.0 mg) and enal **1s** (750  $\mu\text{mol}$ , 52.5 mg, 61.6  $\mu\text{L}$ ), purification of the crude product by flash column chromatography (silica gel, 10-20% EtOAc in hexanes) afforded product **6l** as a pale yellow oil (70.5 mg, 65% yield) in a 1:1 diastereomeric ratio. The enantiomeric ratio of the corresponding 4-nitrobenzoate derivative, prepared following the general procedure, was determined to be 94.5:5.5 for *diastereomer 1* by UPC<sup>2</sup> analysis on a Daicel Chiralpak IA-3 column (eluent: 100% CO<sub>2</sub> for 1 min, gradient 100% - 80% CO<sub>2</sub> in MeOH for 20 min, 80% CO<sub>2</sub> in MeOH for 8 min, gradient 85% - 100% CO<sub>2</sub> in MeOH for 1 min; flow rate 2.0 mL/min,  $\lambda = 256$  nm)  $\tau_{\text{Major}} = 20.65$  min,  $\tau_{\text{Minor}} = 21.10$  min, and 86:14 for *diastereomer 2* by UPC<sup>2</sup> analysis on a Daicel Chiralpak OJ-3 column (eluent: 100% CO<sub>2</sub> for 1 min, gradient 100% - 90% CO<sub>2</sub> in CH<sub>3</sub>CN for 5 min, 90% CO<sub>2</sub> in CH<sub>3</sub>CN for 2 min, gradient 90% - 100% CO<sub>2</sub> in CH<sub>3</sub>CN for 1 min; flow rate 2.0 mL/min,  $\lambda = 256$  nm)  $\tau_{\text{Major}} = 6.80$  min,  $\tau_{\text{Minor}} = 6.50$  min.

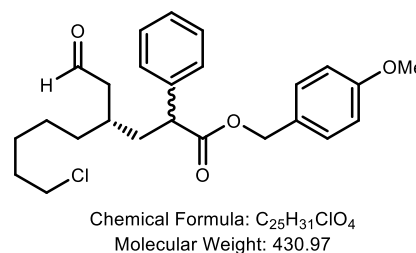

$[\alpha]_{\text{D}}^{26} = -3.6$  (c = 1.0, CHCl<sub>3</sub>, 1:1 d.r., 94.5:5.5 e.r.<sup>1</sup>, 86:14 e.r.<sup>2</sup>).

**<sup>1</sup>H NMR (400 MHz, CDCl<sub>3</sub>, mixture of diastereoisomers):**  $\delta = 9.63$  (t,  $J = 2.3$  Hz, 1H), 9.61 (t,  $J = 2.1$  Hz, 1H), 7.34 – 7.24 (m, 10H), 7.22 – 7.16 (m, 4H), 6.87 – 6.80 (m, 4H), 5.09 (d,  $J = 12.0$  Hz, 1H), 5.08 (d,  $J = 12.0$  Hz, 1H), 4.98 (d,  $J = 12.1$  Hz, 2H), 3.79 (s, 6H), 3.69 – 3.61 (m, 2H), 3.50 (t,  $J = 6.7$  Hz, 2H), 3.48 (t,  $J = 6.7$  Hz, 2H), 2.38 – 2.26 (m, 4H), 2.16 (ddd,  $J = 13.7, 8.4, 6.4$  Hz, 1H), 2.07 – 1.99 (m, 1H), 1.90 – 1.81 (m, 3H), 1.76 – 1.67 (m, 5H), 1.37 – 1.23 (m, 12H) ppm. **<sup>13</sup>C NMR (101 MHz, CDCl<sub>3</sub>, mixture of diastereoisomers):**  $\delta = 202.4, 202.3, 173.7, 173.6, 159.7$  (2C), 138.7, 138.7, 130.1 (2C), 128.9, 128.9, 128.1, 128.0, 128.0 (2C), 127.6, 127.6, 114.0 (2C), 66.6 (2C), 55.4 (2C), 49.4, 49.4, 48.3, 48.2, 45.1, 45.0, 37.9 (2C), 33.9, 33.8, 32.5 (2C), 30.9 (2C), 27.1, 27.0, 25.7, 25.7 ppm.

**HRMS (ESI):** m/z calculated for [C<sub>26</sub>H<sub>31</sub>ClO<sub>4</sub>Na]<sup>+</sup> [M+Na]<sup>+</sup>: 453.1803; found: 453.1796.

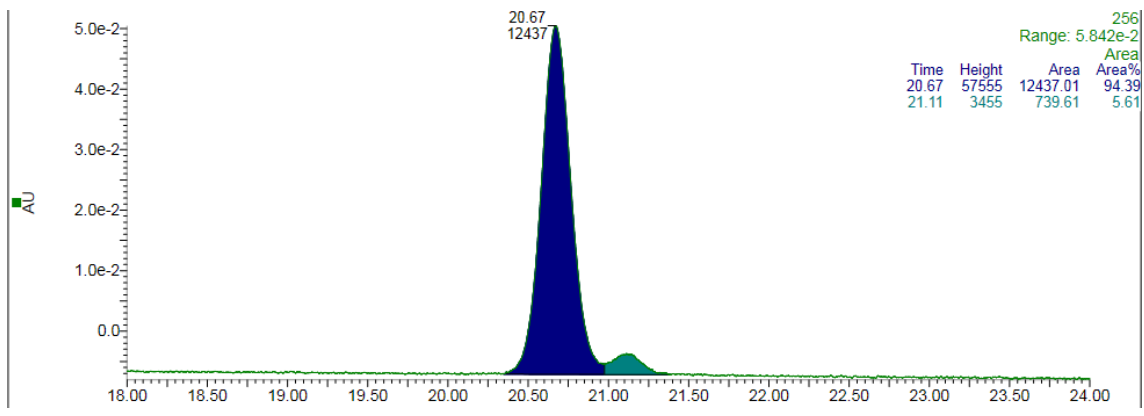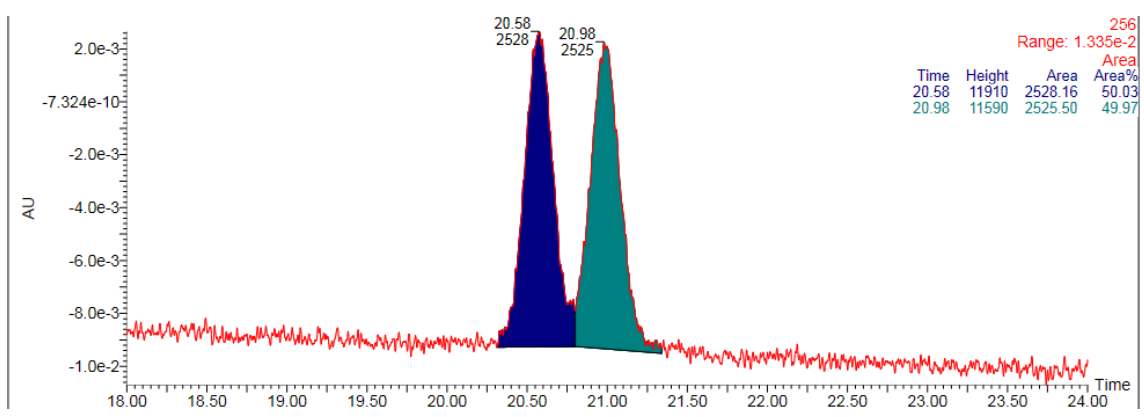

Supplementary Figure 52: UPC<sup>2</sup> traces of **6l**, diastereomer 1

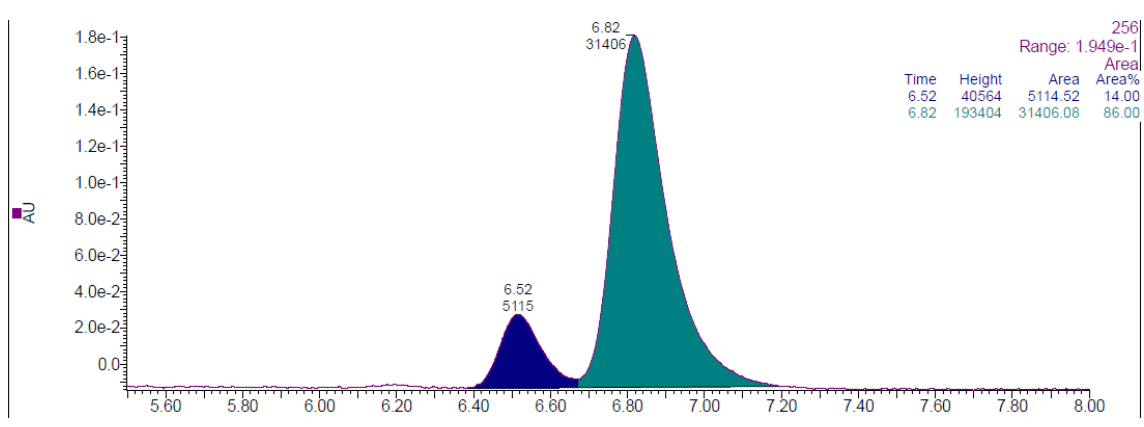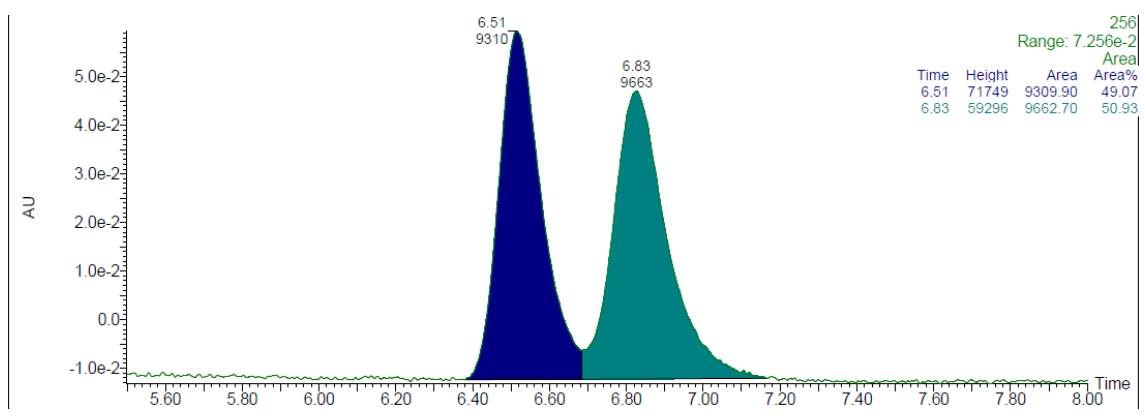

Supplementary Figure 53: UPC<sup>2</sup> traces of **6l**, diastereomer 2

#### 4-Methoxybenzyl (S)-13-hydroxy-4-(2-oxoethyl)-2-phenyltridecanoate (6m)

Following the general procedure **E** using acrylate **5a** (250  $\mu\text{mol}$ , 67.0 mg) and enal **1q** (750  $\mu\text{mol}$ , 153 mg), purification of the crude product by flash column chromatography (silica gel, 5-10% EtOAc in hexanes) afforded product **6m** as a pale yellow oil (84.0 mg, 71% yield) in a 1.1:1 diastereomeric ratio. The enantiomeric ratio of the corresponding 4-nitrobenzoate derivative, prepared following the general procedure, was determined to be 92:8

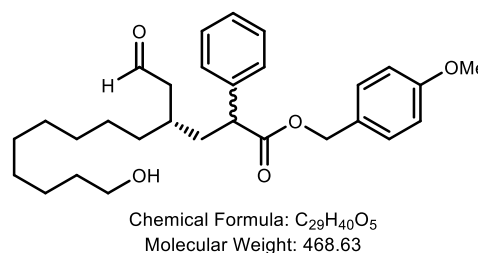

for *diastereomer 1* by UPC<sup>2</sup> analysis on a Daicel Chiralpak OJ-3 column (eluent: 100% CO<sub>2</sub> for 1 min, gradient 100% - 10% CO<sub>2</sub> in CH<sub>3</sub>CN for 19 min, 10% CO<sub>2</sub> in CH<sub>3</sub>CN for 6 min, gradient 10% - 100% CO<sub>2</sub> in CH<sub>3</sub>CN for 1 min; flow rate 2.0 mL/min,  $\lambda = 256$  nm)  $\tau_{Major} = 23.90$  min,  $\tau_{Minor} = 22.75$  min, and 81.5:18.5 for *diastereomer 2* by UPC<sup>2</sup> analysis on a Daicel Chiralpak OJ-3 column eluent: 100% CO<sub>2</sub> for 1 min, gradient 100% - 10% CO<sub>2</sub> in CH<sub>3</sub>CN for 19 min, 10% CO<sub>2</sub> in CH<sub>3</sub>CN for 6 min, gradient 10% - 100% CO<sub>2</sub> in CH<sub>3</sub>CN for 1 min; flow rate 2.0 mL/min,  $\lambda = 256$  nm)  $\tau_{Major} = 25.60$  min,  $\tau_{Minor} = 23.80$  min.

$[\alpha]_D^{26} = -4.8$  (c = 1.0, CHCl<sub>3</sub>, 1,1:1 d.r., 92:8 e.r.<sup>1</sup>, 81.5:18.5 e.r.<sup>2</sup>)

**<sup>1</sup>H NMR (500 MHz, CDCl<sub>3</sub>, mixture of diastereoisomers):**  $\delta = 9.62$  (t,  $J = 2.4$  Hz, 1H), 9.60 (t,  $J = 2.2$  Hz, 1H), 7.34 – 7.24 (m, 10H), 7.21 – 7.15 (m, 4H), 6.87 – 6.80 (m, 4H), 5.08 (d,  $J = 12.0$  Hz, 2H), 4.98 (d,  $J = 12.1$  Hz, 1H), 4.97 (d,  $J = 12.1$  Hz, 1H), 3.79 (s, 6H), 3.69 – 3.63 (m, 2H), 3.63 (td,  $J = 6.7, 1.2$  Hz, 4H), 2.35 – 2.26 (m, 4H), 2.19 – 2.10 (m, 1H), 2.06 – 2.01 (m, 1H), 1.89 – 1.80 (m, 3H), 1.77 – 1.71 (m, 1H), 1.60 (bs, 2H), 1.63 – 1.52 (m, 4H), 1.34 – 1.17 (m, 28H) ppm. **<sup>13</sup>C NMR (126 MHz, CDCl<sub>3</sub>, mixture of diastereoisomers):**  $\delta = 202.8, 202.6, 173.8, 173.7, 159.7$  (2C), 138.8, 138.8, 130.0, 130.0, 128.9, 128.8, 128.1 (2C), 128.1 (2C), 127.5 (2C), 114.0, 113.9, 66.6 (2C), 63.2 (2C), 55.4 (2C), 49.4, 49.4, 48.3, 48.3, 38.0 (2C), 34.1, 33.9, 32.9 (2C), 31.1, 31.0, 29.8, 29.7, 29.6 (2C), 29.5 (2C), 29.5 (2C), 26.4, 26.3, 25.8 (2C) ppm.

**HRMS (ESI):** m/z calculated for [C<sub>29</sub>H<sub>40</sub>O<sub>5</sub>Na]<sup>+</sup> [M+Na]<sup>+</sup>: 491.2768; found: 491.2768.

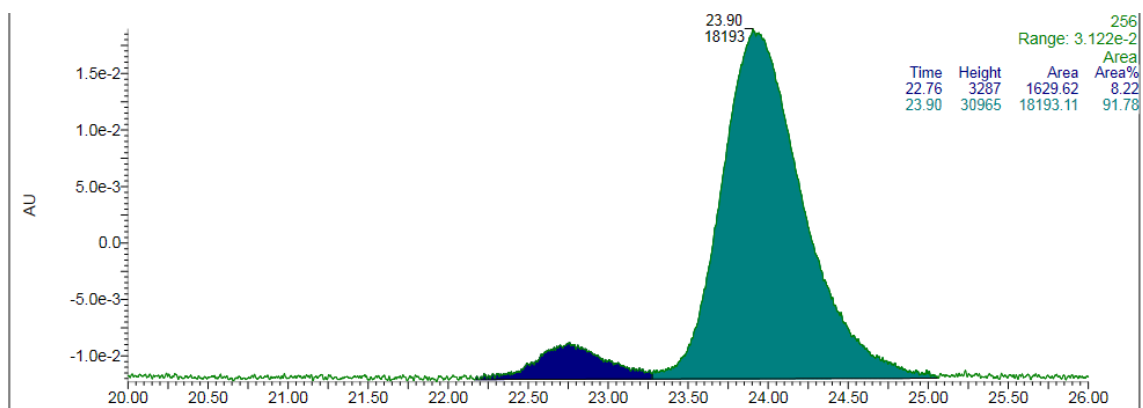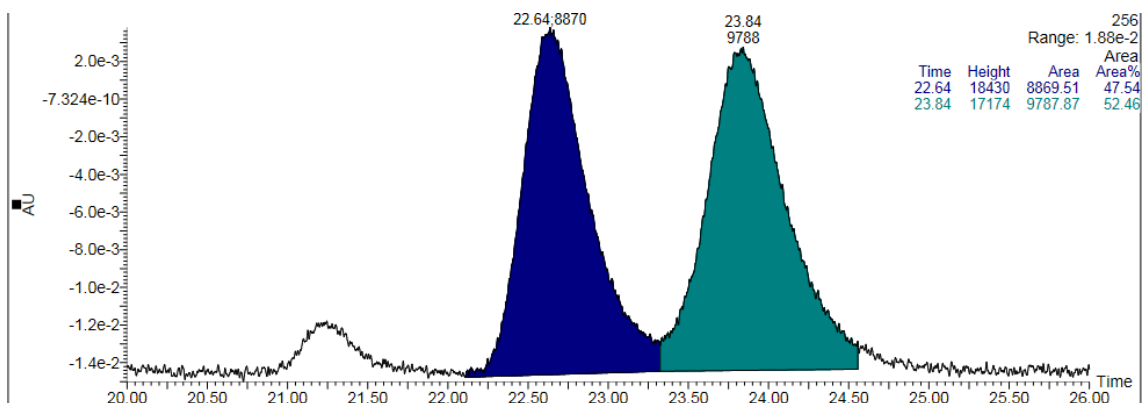

Supplementary Figure 54: UPC<sup>2</sup> traces of **6m**, diastereomer 1

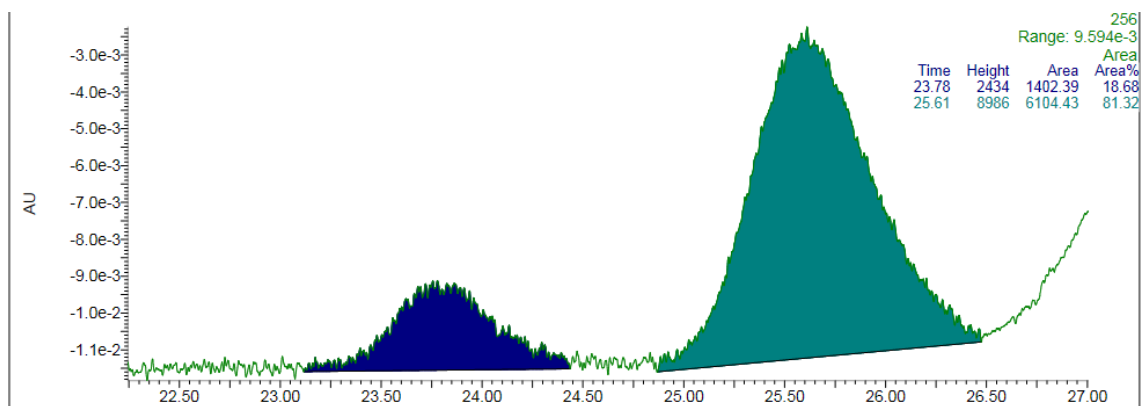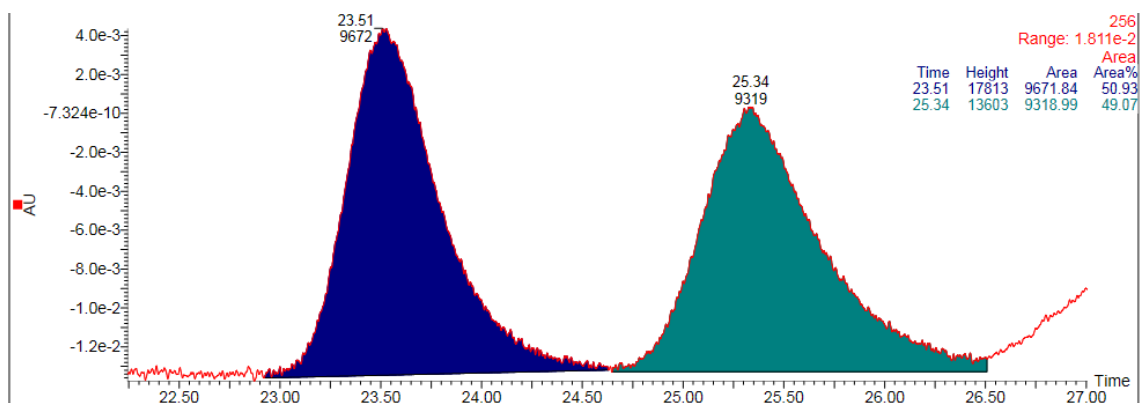

Supplementary Figure 55: UPC<sup>2</sup> traces of **6m**, diastereomer 2.

#### 4-Methoxybenzyl (S)-7-(benzyloxy)-4-(2-oxoethyl)-2-phenylheptanoate (6n)

Following the general procedure E using acrylate **5a** (250  $\mu\text{mol}$ , 67.0 mg) and enal **1n** (750  $\mu\text{mol}$ , 153 mg), purification of the crude product by flash column chromatography (silica gel, 5-10% EtOAc in hexanes) afforded product **6n** as a pale yellow oil (84.0 mg, 71% yield) in a 1.1:1 diastereomeric ratio. The enantiomeric ratio of the corresponding 4-

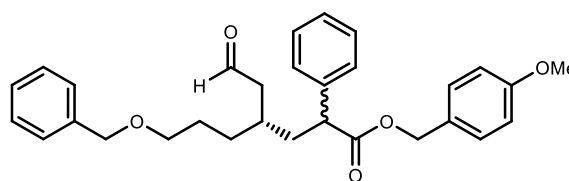

Chemical Formula:  $\text{C}_{30}\text{H}_{34}\text{O}_5$   
Molecular Weight: 474.60

nitrobenzoate derivative, prepared following the general procedure, was determined to be 93.5:6.5 for *diastereomer 1* by UPC<sup>2</sup> analysis on a Daicel Chiralpak OJ-3 column (eluent: 100%  $\text{CO}_2$  for 1 min, gradient 100% - 75%  $\text{CO}_2$  in  $\text{CH}_3\text{CN}$  for 8 min, 75%  $\text{CO}_2$  in  $\text{CH}_3\text{CN}$  for 4 min, gradient 75% - 100%  $\text{CO}_2$  in  $\text{CH}_3\text{CN}$  for 2 min; flow rate 2.0 mL/min,  $\lambda = 256$  nm)  $\tau_{\text{Major}} = 6.15$  min,  $\tau_{\text{Minor}} = 5.75$  min, and 83.5:16.5 for *diastereomer 2* by UPC<sup>2</sup> analysis on a Daicel Chiralpak ID-3 column (eluent: 100%  $\text{CO}_2$  for 1 min, gradient 100% - 60%  $\text{CO}_2$  in  $\text{CH}_3\text{CN}$  for 5 min, 60%  $\text{CO}_2$  in  $\text{CH}_3\text{CN}$  for 2 min, gradient 60% - 100%  $\text{CO}_2$  in  $\text{CH}_3\text{CN}$  for 1 min; flow rate 2.0 mL/min,  $\lambda = 256$  nm)  $\tau_{\text{Major}} = 6.95$  min,  $\tau_{\text{Minor}} = 6.70$  min.

$[\alpha]_{\text{D}}^{26} = -3.2$  (c = 1.0,  $\text{CHCl}_3$ , 1.1:1 d.r., 93.5:6.5 e.r.<sup>1</sup>, 83.5:16.5 e.r.<sup>2</sup>).

**<sup>1</sup>H NMR (400 MHz,  $\text{CDCl}_3$ , mixture of diastereoisomers):**  $\delta = 9.63$  (t,  $J = 2.3$  Hz, 1H), 9.61 (t,  $J = 2.1$  Hz, 1H), 7.40 – 7.22 (m, 20H), 7.22 – 7.15 (m, 4H), 6.90 – 6.80 (m, 4H), 5.08 (d,  $J = 12.1$  Hz, 1H), 5.08 (d,  $J = 12.1$  Hz, 1H), 4.98 (d,  $J = 12.0$  Hz, 1H), 4.98 (d,  $J = 12.0$  Hz, 1H), 4.48 (s, 2H), 4.45 (s, 2H), 3.79 (s, 3H), 3.79 (s, 3H), 3.71 – 3.64 (m, 2H), 3.42 (t,  $J = 6.3$  Hz, 2H), 3.38 (t,  $J = 6.3$  Hz, 2H), 2.39 – 2.28 (m, 4H), 2.20 – 2.01 (m, 2H), 1.94 – 1.82 (m, 3H), 1.81 – 1.74 (m, 1H), 1.59 – 1.37 (m, 8H) ppm. **<sup>13</sup>C NMR (101 MHz,  $\text{CDCl}_3$ , mixture of diastereoisomers):**  $\delta = 202.4$ , 202.3, 173.7, 173.7, 159.7 (2C), 138.7, 138.7, 138.6, 138.6, 130.0 (2C), 128.7, 128.8, 128.5 (2C), 128.1 (2C), 128.1 (2C), 127.8, 127.7, 127.7 (2C), 127.6 (2C), 114.0 (2C), 73.1, 73.0, 70.3, 70.3, 66.6 (2C), 55.4 (2C), 49.4, 49.3, 48.2 (2C), 37.8, 37.8, 30.9, 30.7, 30.6, 30.4, 26.7, 26.6 ppm.

**HRMS (ESI):** m/z calculated for  $[\text{C}_{30}\text{H}_{34}\text{O}_5\text{Na}]^+$   $[\text{M}+\text{Na}]^+$ : 497.2298; found: 497.2295.



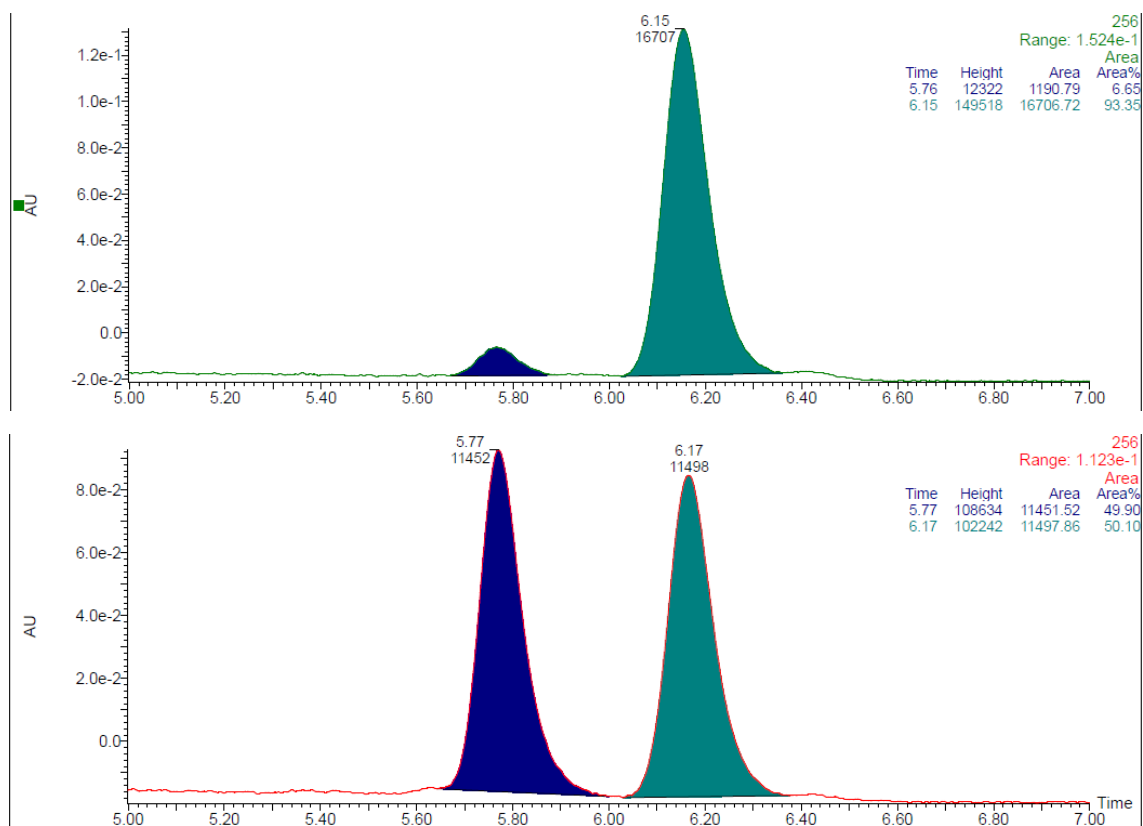

Supplementary Figure 56: UPC<sup>2</sup> traces of **6n**, diastereomer 1.

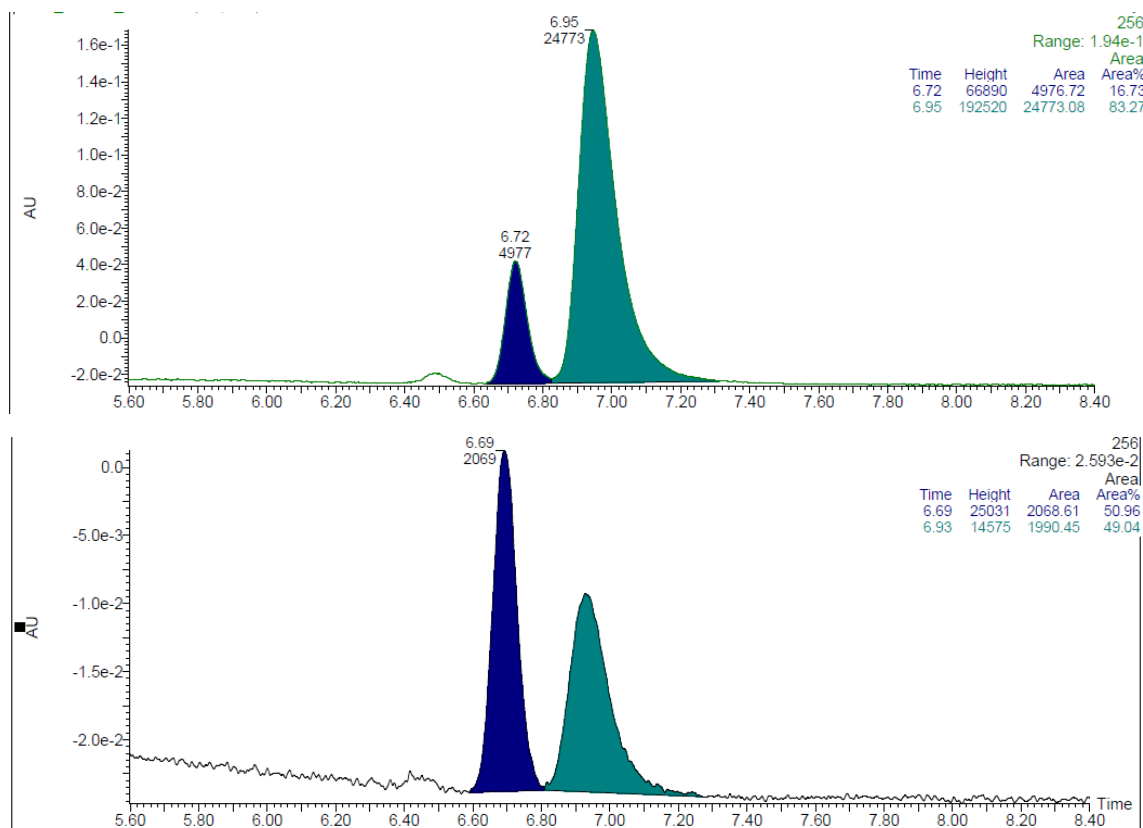

Supplementary Figure 57: UPC<sup>2</sup> traces of **6n**, diastereomer 2

## 1-(4-Methoxybenzyl) 8-methyl (S)-4-(2-oxoethyl)-2-phenyloctanedioate (60)

Following the general procedure E using acrylate **5a** (250  $\mu\text{mol}$ , 67.0 mg) and enal **1o** (750  $\mu\text{mol}$ , 117 mg), purification of the crude product by flash column chromatography (silica gel, 5-10% EtOAc in hexanes) afforded product **60** as a pale yellow oil (62.0 mg, 58% yield) in a 1.2:1 diastereomeric ratio. The enantiomeric ratio was determined to be 93:7 for *diastereomer 1* and 85:15 for *diastereomer 2* by UPC<sup>2</sup> analysis on a Daicel Chiralpak IA-3 column (eluent: 100% CO<sub>2</sub> for 1 min, gradient 100% - 75% CO<sub>2</sub> in iPrOH for 49 min, 75% CO<sub>2</sub> in iPrOH for 10 min, gradient 75% - 100% CO<sub>2</sub> in iPrOH for 1 min; flow rate 2.0 mL/min,  $\lambda = 256 \text{ nm}$ )  $\tau_{\text{Major}} = 45.35 \text{ min}$ ,  $\tau_{\text{Minor}} = 46.25 \text{ min}$  for *diastereomer 1*, and  $\tau_{\text{Major}} = 47.80 \text{ min}$ ,  $\tau_{\text{Minor}} = 47.05 \text{ min}$  for *diastereomer 2*.

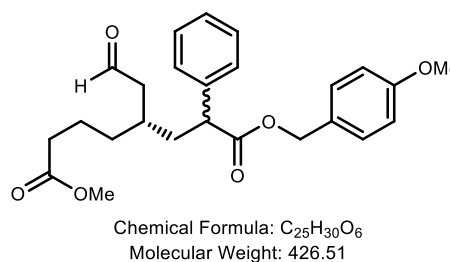

$[\alpha]_{\text{D}}^{26} = -4.8$  (c = 1.0, CHCl<sub>3</sub>, 1.2:1 d.r., 93:7 e.r.<sup>1</sup>, 85:15 e.r.<sup>2</sup>).

**<sup>1</sup>H NMR (500 MHz, CDCl<sub>3</sub>, mixture of diastereoisomers):**  $\delta = 9.63$  (t, J = 2.2 Hz, 1H), 9.61 (t, J = 2.0 Hz, 1H), 7.34 – 7.22 (m, 10H), 7.21 – 7.16 (m, 4H), 6.87 – 6.79 (m, 4H), 5.08 (d, J = 12.1 Hz, 2H), 4.97 (d, J = 12.0 Hz, 1H), 4.97 (d, J = 12.0 Hz, 1H), 3.79 (s, 6H), 3.67 – 3.62 (m, 8H), 2.37 – 2.30 (m, 4H), 2.27 – 2.18 (m, 4H), 2.16 – 2.11 (m, 1H), 2.07 – 2.03 (m, 1H), 1.90 – 1.82 (m, 3H), 1.79 – 1.73 (m, 1H), 1.60 – 1.50 (m, 4H), 1.37 – 1.27 (m, 4H) ppm. **<sup>13</sup>C NMR (126 MHz, CDCl<sub>3</sub>, mixture of diastereoisomers):**  $\delta = 202.2, 202.0, 173.8, 173.8, 173.6$  (2C), 159.7 (2C), 138.7, 138.6, 130.1 (2C), 128.9, 128.9, 128.1, 128.0, 128.0 (2C), 127.6 (2C), 114.0 (2C), 66.6 (2C), 55.4 (2C), 51.6 (2C), 49.4, 49.3, 48.0 (2C), 37.7, 37.7, 34.0, 34.0, 33.4, 33.2, 30.8, 30.6, 21.7, 21.7 ppm.

**HRMS (ESI):** m/z calculated for [C<sub>25</sub>H<sub>30</sub>O<sub>6</sub>Na]<sup>+</sup> [M+Na]<sup>+</sup>: 449.1935; found: 449.1936.

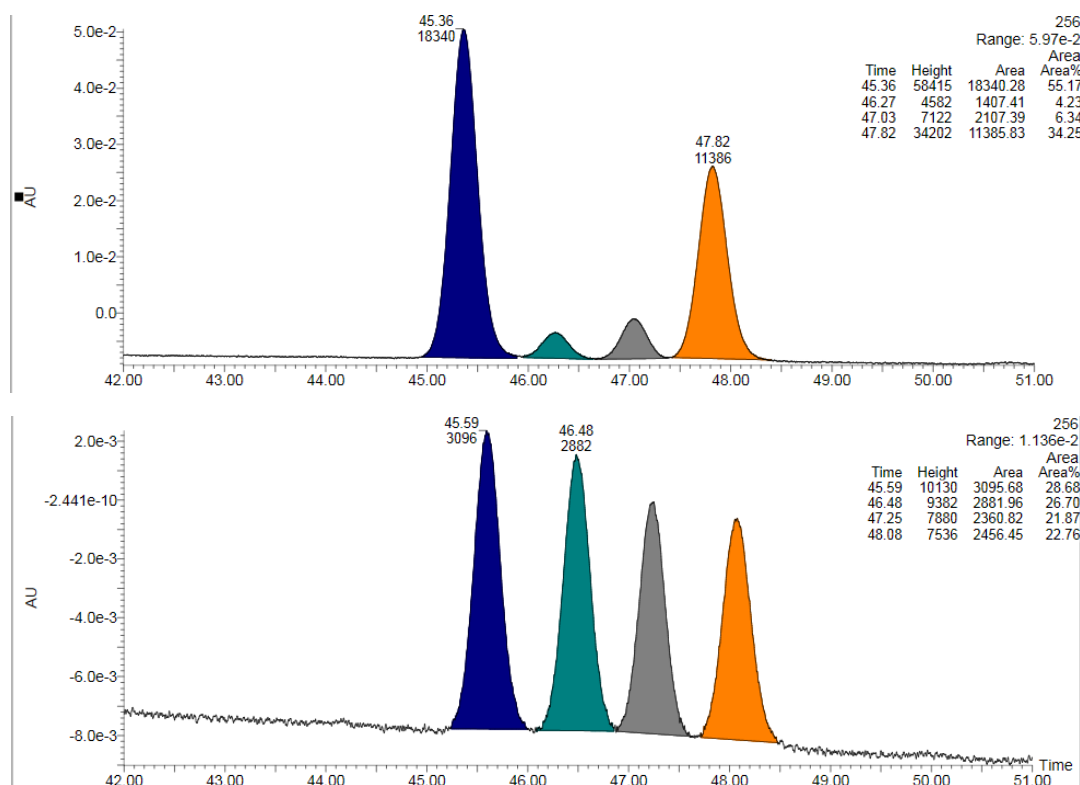

Supplementary Figure 58: UPC<sup>2</sup> traces of **60**, mixture of diastereomers.

## Methyl (4*S*)-phenyl-4-(2-oxoethyl)nonanoate (**6p**)

Prepared according to the general procedure **E** using octenal **1a** (112  $\mu\text{L}$ , 750  $\mu\text{mol}$ ) and acrylate **5b** (40.5 mg, 250  $\mu\text{mol}$ ), the crude product was purified by flash column chromatography (silica, 5% EtOAc in *n*-hexanes) to obtain product **6p** as a colorless oil (54.0 mg, 75% yield) in a 1.2:1 diastereomeric ratio. Analytical data is in agreement with the literature.<sup>29</sup> The enantiomeric ratio of the corresponding 4-nitrobenzoate derivative, prepared following the general procedure, was determined to be 94:6 for *diastereomer 1* by UPC<sup>2</sup> analysis on a Daicel Chiralpak OJ-3 column (eluent: 100% CO<sub>2</sub> for 1 min, gradient 100% - 85% CO<sub>2</sub> in CH<sub>3</sub>CN for 11 min, 85% CO<sub>2</sub> in CH<sub>3</sub>CN for 2 min, gradient 85% - 100% CO<sub>2</sub> in CH<sub>3</sub>CN for 1 min; flow rate 2.0 mL/min,  $\lambda = 258 \text{ nm}$ ,  $\tau_{\text{Major}} = 4.60 \text{ min}$ ,  $\tau_{\text{Minor}} = 4.35 \text{ min}$ .), and 86.0:14.0 for *diastereomer 2* by UPC<sup>2</sup> analysis on a Daicel Chiralpak ID-3 column (eluent: 100% CO<sub>2</sub> for 1 min, gradient 100% - 60% CO<sub>2</sub> in CH<sub>3</sub>CN for 5 min, 60% CO<sub>2</sub> in CH<sub>3</sub>CN for 2 min, gradient 60% - 100% CO<sub>2</sub> in CH<sub>3</sub>CN for 1 min; flow rate 2.0 mL/min,  $\lambda = 256 \text{ nm}$ ,  $\tau_{\text{Major}} = 5.65 \text{ min}$ ,  $\tau_{\text{Minor}} = 5.40 \text{ min}$ )

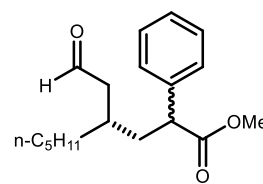

Chemical Formula: C<sub>18</sub>H<sub>26</sub>O<sub>3</sub>  
Molecular Weight: 290.4030

$[\alpha]_{\text{D}}^{24} = -148.1$  ( $c = 0.5$ , CHCl<sub>3</sub>, 1.2:1 d.r., 94:6 e.r.<sup>1</sup>, 86:14 e.r.<sup>2</sup>).

<sup>1</sup>H NMR (500 MHz, CDCl<sub>3</sub>, mixture of diastereoisomers):  $\delta = 9.72$  (t,  $J = 2.3 \text{ Hz}$ , 1H), 9.69 (t,  $J = 2.2 \text{ Hz}$ , 1H), 7.47 – 7.18 (m, 10H), 3.68 (s, 6H), 2.40 – 2.34 (m, 4H), 2.19 – 2.14 (m, 2H), 2.07 – 2.02 (m, 2H), 1.94 – 1.84 (m, 4H), 1.81 – 1.75 (m, 2H), 1.47 – 1.09 (m, 14H), 0.98 – 0.76 (m, 6H) ppm.

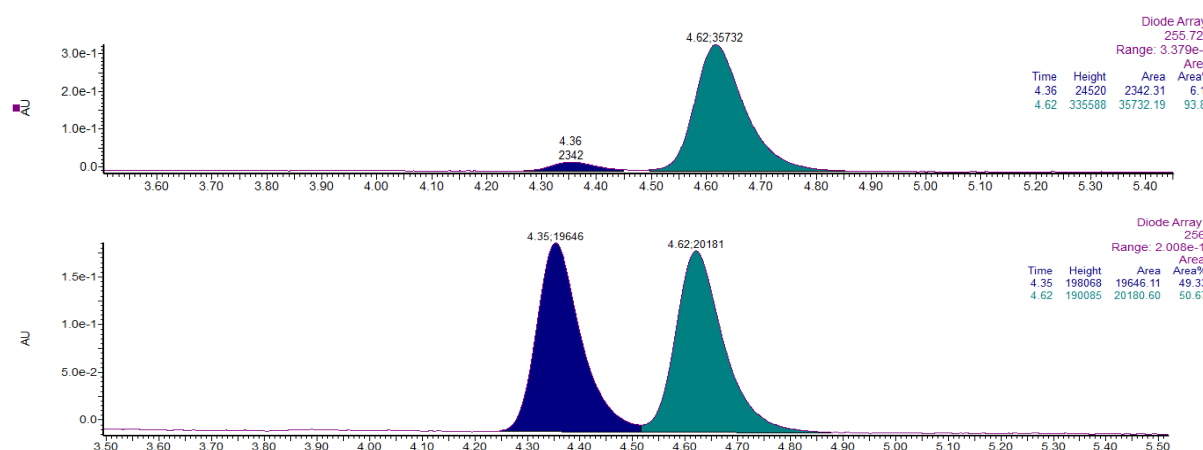

Supplementary Figure 59: UPC<sup>2</sup> Traces of **6p**, diastereomer 1.

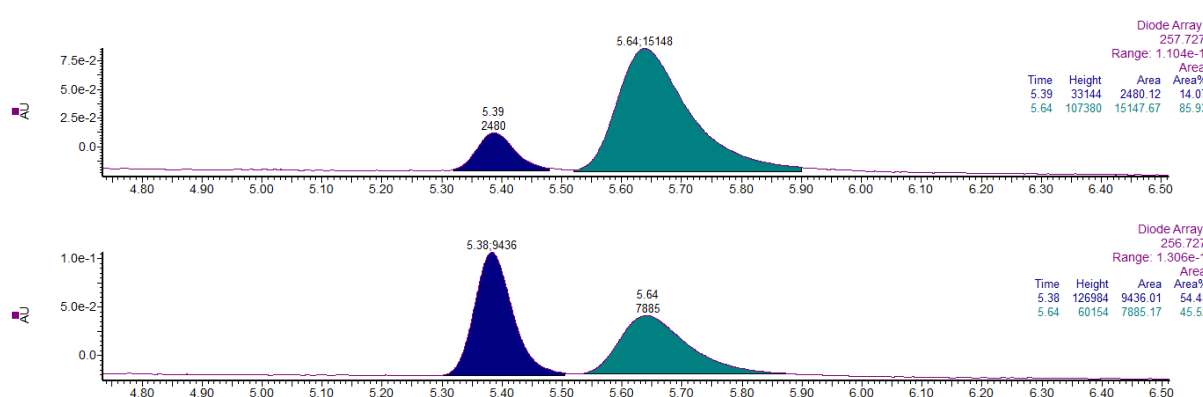

Supplementary Figure 60: UPC<sup>2</sup> Traces of **6p**, diastereomer 2.

## Benzyl (4*S*)-phenyl-4-(2-oxoethyl)nonanoate (**6q**)

Prepared according to the general procedure **E** using octenal **1a** (46.0  $\mu$ L, 300  $\mu$ mol) and acrylate **5c** (23.8 mg, 100  $\mu$ mol), the crude product was purified by flash column chromatography (silica, 5% EtOAc in n-hexanes) to obtain product **6q** as a colorless oil (33.0 mg, 89% yield) in a 1.1:1 diastereomeric ratio. Analytical data is in agreement with the literature.<sup>29</sup> The enantiomeric ratio of the corresponding 4-nitrobenzoate derivative, prepared following the general procedure, was determined to be 94:6 for *diastereomer 1* by UPC<sup>2</sup> analysis on a Daicel Chiralpak OJ-3 column (eluent: 100% CO<sub>2</sub> for 1 min, gradient 100% - 93% CO<sub>2</sub> in CH<sub>3</sub>CN for 11 min, 93% CO<sub>2</sub> in CH<sub>3</sub>CN for 2 min, gradient 93% - 100% CO<sub>2</sub> in CH<sub>3</sub>CN for 1 min; flow rate 2.0 mL/min,  $\lambda$  = 254 nm,  $\tau_{Major}$  = 9.40 min,  $\tau_{Minor}$  = 8.60 min.), and 88:12 for *diastereomer 2* by UPC<sup>2</sup> analysis on a Daicel Chiralpak ID-3 column (eluent: 100% CO<sub>2</sub> for 1 min, gradient 100% - 60% CO<sub>2</sub> in CH<sub>3</sub>CN for 5 min, 60% CO<sub>2</sub> in CH<sub>3</sub>CN for 2 min, gradient 60% - 100% CO<sub>2</sub> in CH<sub>3</sub>CN for 1 min; flow rate 2.0 mL/min,  $\lambda$  = 254 nm,  $\tau_{Major}$  = 5.40 min,  $\tau_{Minor}$  = 5.25 min.)

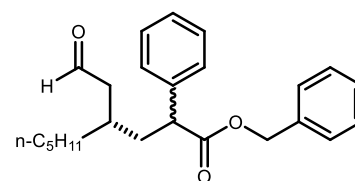

Chemical Formula: C<sub>24</sub>H<sub>30</sub>O<sub>3</sub>  
Molecular Weight: 366,5010

$[\alpha]_D^{24} = -118.3$  ( $c = 0.5$ , CHCl<sub>3</sub>, 1.1:1 d.r., 94:6 e.r.<sup>1</sup>, 88:12 e.r.<sup>2</sup>).

<sup>1</sup>H NMR (500 MHz, CDCl<sub>3</sub>, mixture of diastereoisomers):  $\delta = 9.66$  (t,  $J = 2.3$  Hz, 1H), 9.64 (t,  $J = 2.2$  Hz, 1H), 7.35 – 7.29 (m, 14H), 7.27 – 7.24 (m, 6H), 5.16 (d,  $J = 12.4$  Hz, 2H), 5.08 (dd,  $J = 12.4$ , 2.4 Hz, 2H), 3.74 – 3.70 (m, 2H), 2.36 – 2.33 (m, 4H), 2.22 – 2.16 (m, 2H), 2.13 – 2.02 (m, 1H), 1.86 – 1.73 (m, 1H), 1.50 – 1.13 (m, 18H), 0.91 – 0.87 (m, 6H) ppm.

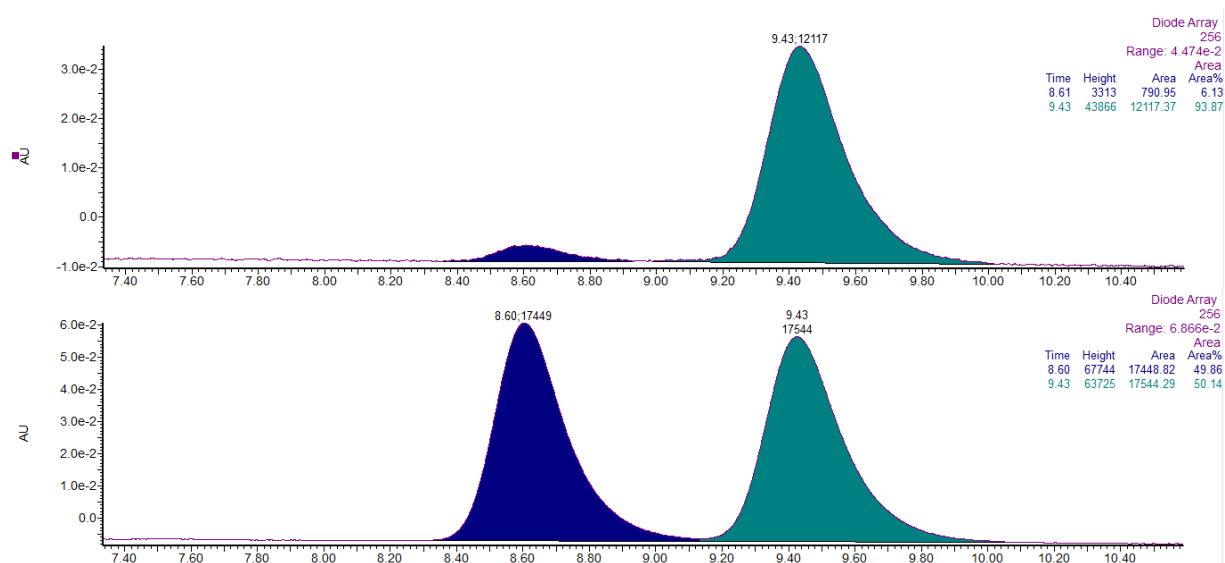

Supplementary Figure 61: UPC<sup>2</sup> Traces of **6q**, diastereomer 1.

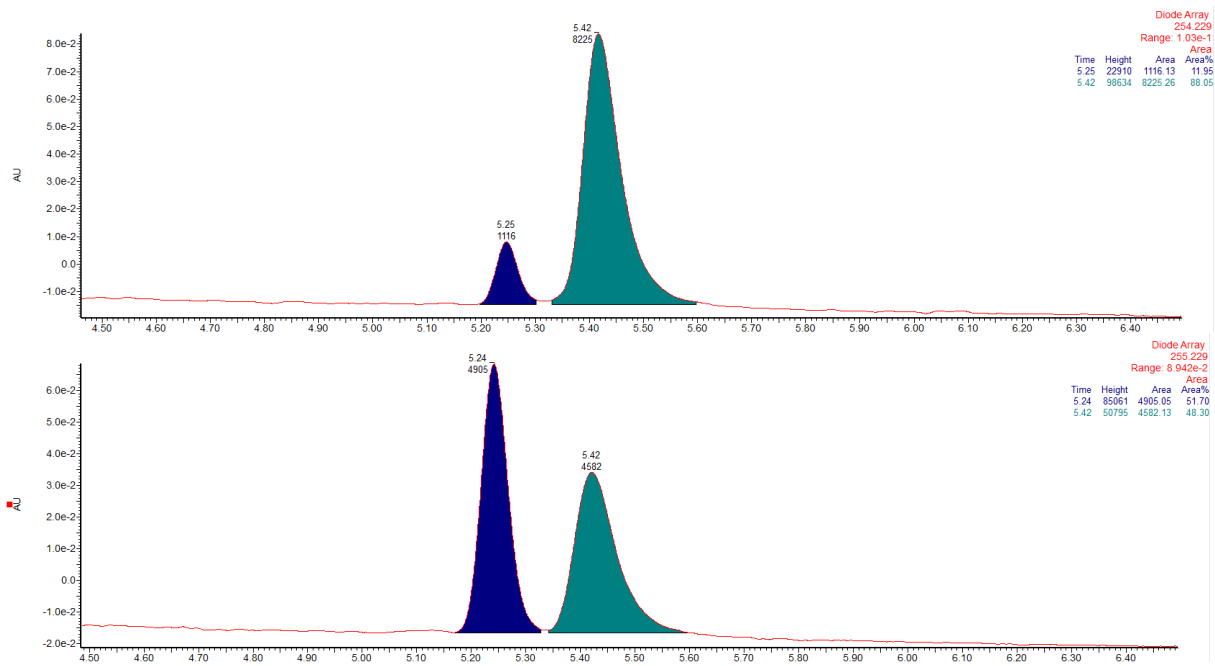

Supplementary Figure 62: UPC<sup>2</sup> Traces of 6q, diastereomer 2.

### Benzyl (4*S*)-(4-methylphenyl)-4-(2-oxoethyl)nonanoate (**6r**)

Prepared according to the general procedure **E** using octenal **1a** (112  $\mu$ L, 750  $\mu$ mol) and acrylate **5d** (63.0 mg, 250  $\mu$ mol), the crude product was purified by flash column chromatography (silica, 5% EtOAc in n-hexanes) to obtain product **6r** as a colorless oil (72.0 mg, 76% yield) in a 1.5:1 diastereomeric ratio. The enantiomeric ratio was determined to be 93.5:6.5 and 87.5:12.5 by HPLC analysis on a Daicel Chiralpak IC-3 column, isocratic 96:4 n-hexane: iPrOH, flow rate = 0.45 mL/min, 15  $^{\circ}$ C;  $\lambda$  = 215 nm. Diastereoisomer 1:  $\tau_{\text{Major}}$  = 36.70 min,  $\tau_{\text{Minor}}$  = 51.65 min. Diastereoisomer 2:  $\tau_{\text{Major}}$  = 34.55 min,  $\tau_{\text{Minor}}$  = 44.55 min.

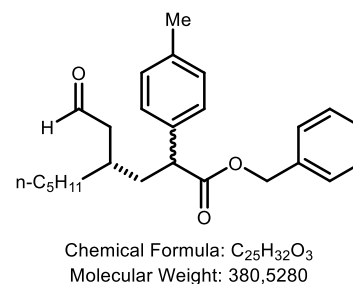

$[\alpha]_{\text{D}}^{25}$  = -4.5 (c = 0.5, CHCl<sub>3</sub>, 1.5:1 d.r., 93.5:6.5 e.r.<sup>1</sup>, 87.5:12.5 e.r.<sup>2</sup>).

**<sup>1</sup>H NMR (500 MHz, CDCl<sub>3</sub>, mixture of diastereoisomers):**  $\delta$  = 9.66 (t, *J* = 2.4 Hz, 1H), 9.63 (t, *J* = 2.2 Hz, 1H), 7.37 – 7.31 (m, 6H), 7.29 – 7.26 (m, 4H), 7.23 – 7.19 (m, 4H), 7.17 – 7.13 (m, 4H), 5.17 (d, *J* = 12.4 Hz, 2H), 5.07 (dd, *J* = 12.4, 2.0 Hz, 2H), 3.73 – 3.67 (m, 2H), 2.36 (s, 6H), 2.34 – 2.32 (m, 3H), 2.24 – 2.13 (m, 1H), 2.11 – 2.02 (m, 1H), 1.89 (m, 3H), 1.78 (dt, *J* = 14.1, 7.1 Hz, 1H), 1.44 – 1.14 (m, 18H), 0.91 – 0.87 (m, 6H) ppm. **<sup>13</sup>C NMR (126 MHz, CDCl<sub>3</sub>, mixture of diastereoisomers):**  $\delta$  = 202.8, 202.7, 173.9, 173.8, 137.3 (2C), 136.0 (2C), 135.7 (2C), 129.6, 129.5, 128.6 (2C), 128.3, 128.2 (2C), 128.2, 128.0, 127.9, 66.7 (2C), 49.0 (2C), 48.3, 48.3 (2C), 37.9 (2C), 37.9, 34.1, 33.8, 32.1, 32.0, 31.1, 31.0, 26.1, 26.0, 22.87 (2C), 21.2 (2C), 14.2, 14.1 ppm.

**HRMS (ESI):** m/z calculated for [C<sub>25</sub>H<sub>32</sub>O<sub>3</sub>Na]<sup>+</sup> [M+Na]<sup>+</sup>: 403.2244, found: 403.2250.

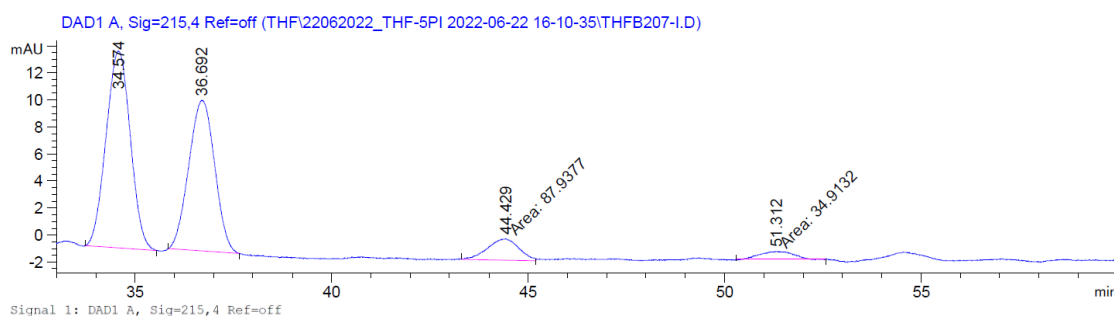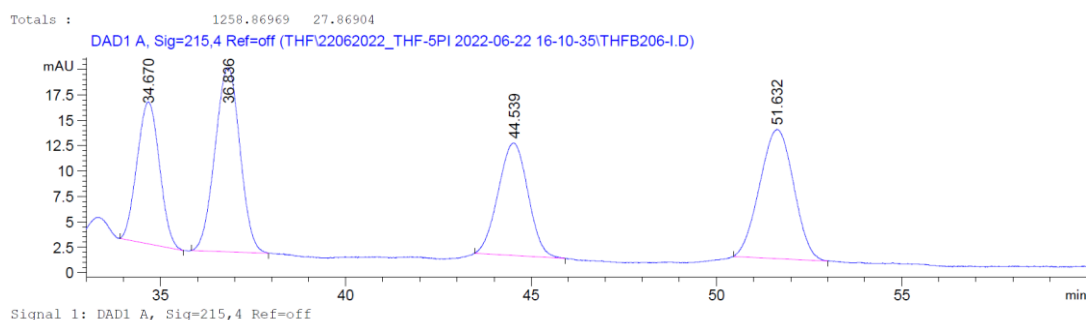

Supplementary Figure 63: HPLC Traces of **6r**.

### Benzyl (4*S*)-(3-methoxyphenyl)-4-(2-oxoethyl)nonanoate (**6s**)

Prepared according to the general procedure E using octenal **1a** (112  $\mu\text{L}$ , 750  $\mu\text{mol}$ ) and acrylate **5e** (67.0 mg, 250  $\mu\text{mol}$ ), the crude product was purified by flash column chromatography (silica, 5% EtOAc in n-hexanes) to obtain product **6s** as a colorless oil (83.5 mg, 85% yield) in a 1:1 diastereomeric ratio. The enantiomeric ratio of the corresponding 4-nitrobenzoate derivative, prepared following the general procedure, was determined to be 94.5:5.5 for *diastereomer 1* by UPC<sup>2</sup> analysis on a Daicel Chiralpak OJ-3 column (eluent: 100% CO<sub>2</sub> for 1 min, gradient 100% - 93% CO<sub>2</sub> in CH<sub>3</sub>CN for 11 min, 93% CO<sub>2</sub> in CH<sub>3</sub>CN for 2 min, gradient 93% - 100% CO<sub>2</sub> in CH<sub>3</sub>CN for 1 min; flow rate 2.0 mL/min,  $\lambda = 256$  nm,  $\tau_{\text{Major}} = 8.35$  min,  $\tau_{\text{Minor}} = 7.75$  min.), and 91:9 for *diastereomer 2* by UPC<sup>2</sup> analysis on a Daicel Chiralpak ID-3 column (eluent: 100% CO<sub>2</sub> for 1 min, gradient 100% - 80% CO<sub>2</sub> in CH<sub>3</sub>CN for 5 min, 80% CO<sub>2</sub> in CH<sub>3</sub>CN for 2 min, gradient 80% - 100% CO<sub>2</sub> in CH<sub>3</sub>CN for 1 min; flow rate 2.0 mL/min,  $\lambda = 256$  nm,  $\tau_{\text{Major}} = 8.20$  min,  $\tau_{\text{Minor}} = 7.85$  min.)

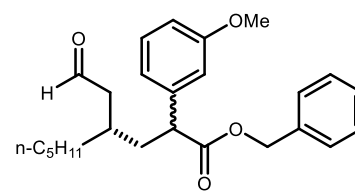

Chemical Formula: C<sub>25</sub>H<sub>32</sub>O<sub>4</sub>  
Molecular Weight: 396,5270

$[\alpha]_{\text{D}}^{24} = -83.1$  ( $c = 1.0$ , CHCl<sub>3</sub>, 1:1 d.r., 94.5:5.5 e.r.<sup>1</sup>, 91:9 e.r.<sup>2</sup>).

**<sup>1</sup>H NMR (500 MHz, CDCl<sub>3</sub>, mixture of diastereoisomers):**  $\delta = 9.67$  (t,  $J = 2.3$  Hz, 1H), 9.64 (t,  $J = 2.2$  Hz, 1H), 7.35 – 7.31 (m, 6H), 7.31 – 7.19 (m, 6H), 6.93 – 6.88 (m, 3H), 6.88 – 6.80 (m, 3H), 5.17 (d,  $J = 12.3$  Hz, 2H), 5.09 (dd,  $J = 12.3, 2.3$  Hz, 2H), 3.80 (s, 3H), 3.79 (s, 3H), 3.75 – 3.65 (m, 2H), 2.39 – 2.30 (m, 4H), 2.17 (ddd,  $J = 13.7, 8.1, 6.7$  Hz, 1H), 2.13 – 2.03 (m, 1H), 1.95 – 1.84 (m, 3H), 1.80 (dt,  $J = 14.0, 7.1$  Hz, 1H), 1.47 – 1.15 (m, 18H), 0.92 – 0.86 (m, 6H) ppm. **<sup>13</sup>C NMR (126 MHz, CDCl<sub>3</sub>, mixture of diastereoisomers):**  $\delta = 202.7, 202.5, 173.5$  (2C), 156.0, 159.9, 140.2, 140.2, 135.9 (2C), 129.8, 129.8, 128.6 (2C), 128.3 (2C), 128.2, 128.2, 120.5, 120.4, 113.6, 113.6, 113.1, 113.08, 66.7 (2C), 55.3 (2C), 49.4, 49.4, 48.3, 48.3, 37.9, 37.8, 34.0, 33.9, 32.0, 32.0, 31.1, 31.0, 26.1, 26.0, 22.6 (2C), 14.1, 14.1 ppm.

**HRMS (ESI):**  $m/z$  calculated for [C<sub>25</sub>H<sub>32</sub>O<sub>4</sub>Na]<sup>+</sup> [M+Na]<sup>+</sup>: 419.2193, found: 419.2181.

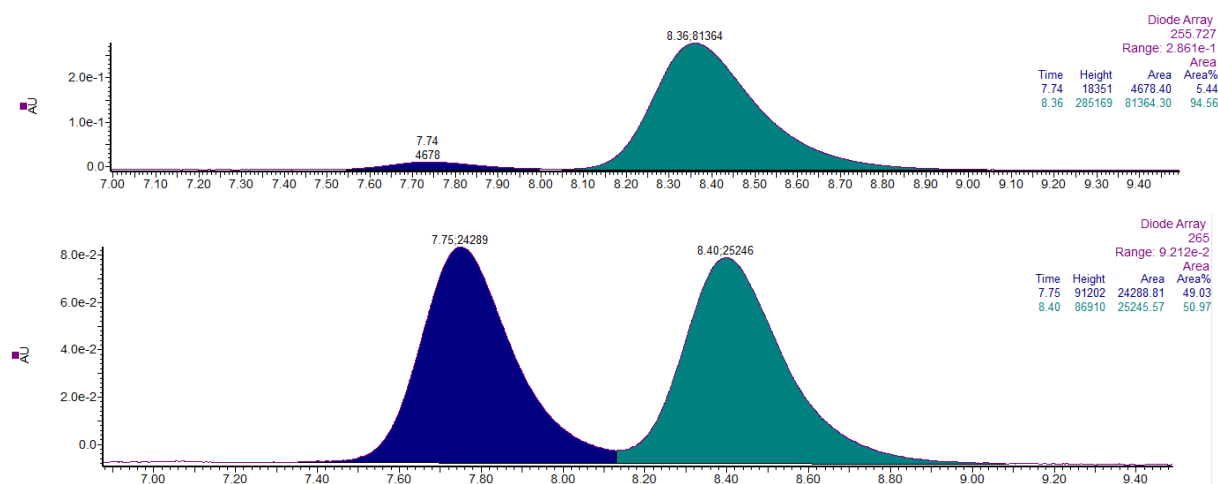

Supplementary Figure 64: UPC<sup>2</sup> Traces of **6s**, diastereomer 1.

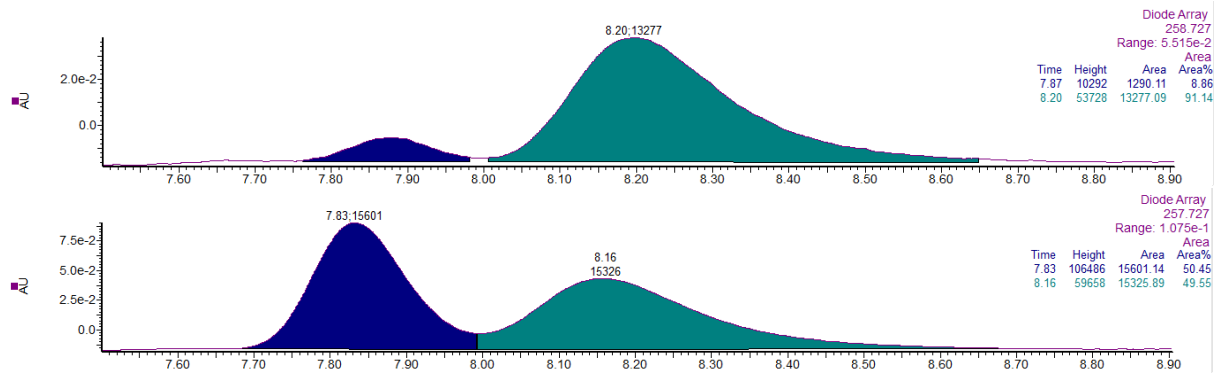

Supplementary Figure 65: UPC<sup>2</sup> Traces of 6s, diastereomer 2.



## Benzyl (4*S*)-(4-fluorophenyl)-4-(2-oxoethyl)nonanoate (**6t**)

Prepared according to the general procedure E using octenal **1a** (112  $\mu$ L, 750  $\mu$ mol) and acrylate **5f** (64.0 mg, 250  $\mu$ mol), the crude product was purified by flash column chromatography (silica, 5% EtOAc in n-hexanes) to obtain **6t** as a colorless oil (85.0 mg, 89% yield) in a 1:1 diastereomeric ratio. The enantiomeric ratio of the corresponding 4-nitrobenzoate derivative, prepared following the general procedure, was determined to be 93:7 for *diastereomer 1* by UPC<sup>2</sup> analysis on a Daicel Chiralpak OJ-3 column (eluent: 100% CO<sub>2</sub> for 1 min, gradient 100% - 93% CO<sub>2</sub> in CH<sub>3</sub>CN for 5 min, 93% CO<sub>2</sub> in CH<sub>3</sub>CN for 2 min, gradient 93% - 100% CO<sub>2</sub> in CH<sub>3</sub>CN for 1 min; flow rate 2.0 mL/min,  $\lambda$  = 255 nm,  $\tau_{Major}$  = 6.25 min,  $\tau_{Minor}$  = 5.80 min.), and 88:12 for *diastereomer 2* by UPC<sup>2</sup> analysis on a Daicel Chiralpak ID-3 column (eluent: 100% CO<sub>2</sub> for 1 min, gradient 100% - 80% CO<sub>2</sub> in CH<sub>3</sub>CN for 5 min, 80% CO<sub>2</sub> in CH<sub>3</sub>CN for 2 min, gradient 80% - 100% CO<sub>2</sub> in CH<sub>3</sub>CN for 1 min; flow rate 2.0 mL/min,  $\lambda$  = 256 nm,  $\tau_{Major}$  = 7.15 min,  $\tau_{Minor}$  = 6.95 min).

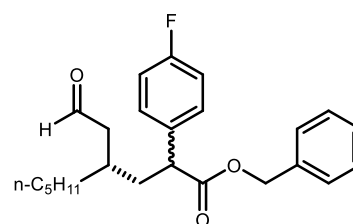

Chemical Formula: C<sub>24</sub>H<sub>29</sub>FO<sub>3</sub>  
Molecular Weight: 384,4914

$[\alpha]_D^{24}$  = -87.9 (c = 1.0, CHCl<sub>3</sub>, 1:1 d.r., 93:7 e.r.<sup>1</sup>, 88:12 e.r.<sup>2</sup>).

**<sup>1</sup>H NMR (500 MHz, CDCl<sub>3</sub>, mixture of diastereoisomers):**  $\delta$  = 9.67 (t, *J* = 2.3 Hz, 1H), 9.65 (t, *J* = 2.1 Hz, 1H), 7.35 – 7.21 (m, 14H), 7.03 (m, 4H), 5.16 (d, *J* = 12.3 Hz, 2H), 5.09 (dd, *J* = 12.3, 2.7 Hz, 2H), 3.76 – 3.69 (m, 2H), 2.37 – 2.28 (m, 4H), 2.20 – 2.09 (m, 1H), 2.10 – 2.00 (m, 1H), 1.89 – 1.82 (m, 3H), 1.77 (dt, *J* = 14.1, 7.1 Hz, 1H), 1.44 – 1.21 (m, 18H), 0.91 – 0.86 (m, 6H) ppm. **<sup>13</sup>C NMR (126 MHz, CDCl<sub>3</sub>, mixture of diastereoisomers):**  $\delta$  = 202.5, 202.4, 173.7, 173.5, 162.3 (d, *J*<sub>C-F</sub> = 246.0 Hz, 2C), 135.8 (2C), 134.5 (d, *J*<sub>C-F</sub> = 3.3 Hz), 134.4 (d, *J*<sub>C-F</sub> = 3.2 Hz), 129.7 (d, *J*<sub>C-F</sub> = 7.8 Hz), 129.6 (d, *J*<sub>C-F</sub> = 7.8 Hz), 128.6 (2C), 128.4 (2C), 128.2, 128.2, 115.7 (d, *J*<sub>C-F</sub> = 21.5 Hz), 115.7 (d, *J*<sub>C-F</sub> = 21.3 Hz), 66.8 (2C), 48.6, 48.6, 48.3, 48.2, 38.1, 38.0, 34.1, 33.8, 32.0, 31.9, 31.0, 30.8, 26.1, 26.0, 22.6 (2C), 14.1, 14.1 ppm. **<sup>19</sup>F{<sup>1</sup>H} NMR (471 MHz, CDCl<sub>3</sub>, mixture of diastereoisomers):**  $\delta$  = -115.04 (s), -115.07 (s) ppm.

**HRMS (ESI):** m/z calculated for [C<sub>24</sub>H<sub>29</sub>FO<sub>3</sub>Na]<sup>+</sup> [M+Na]<sup>+</sup>: 407.1993, found: 407.1997.

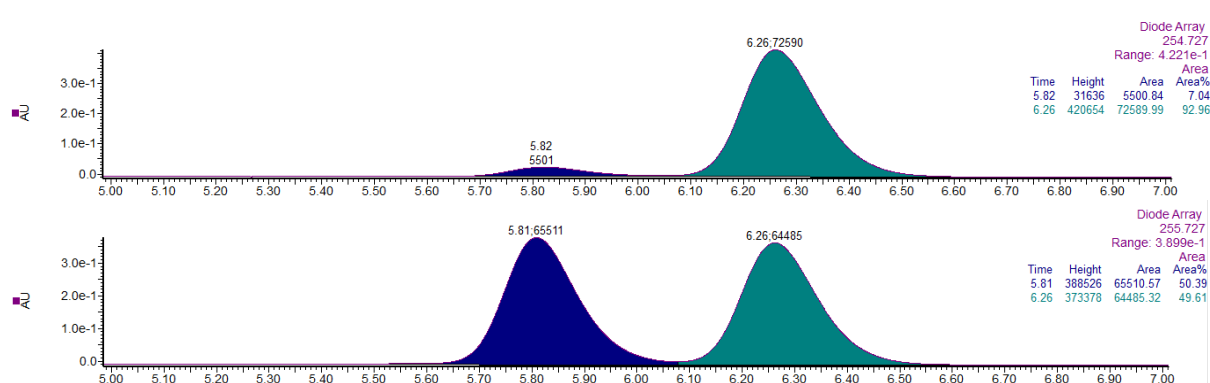

Supplementary Figure 66: UPC<sup>2</sup> Traces of **6t**, diastereomer 1.

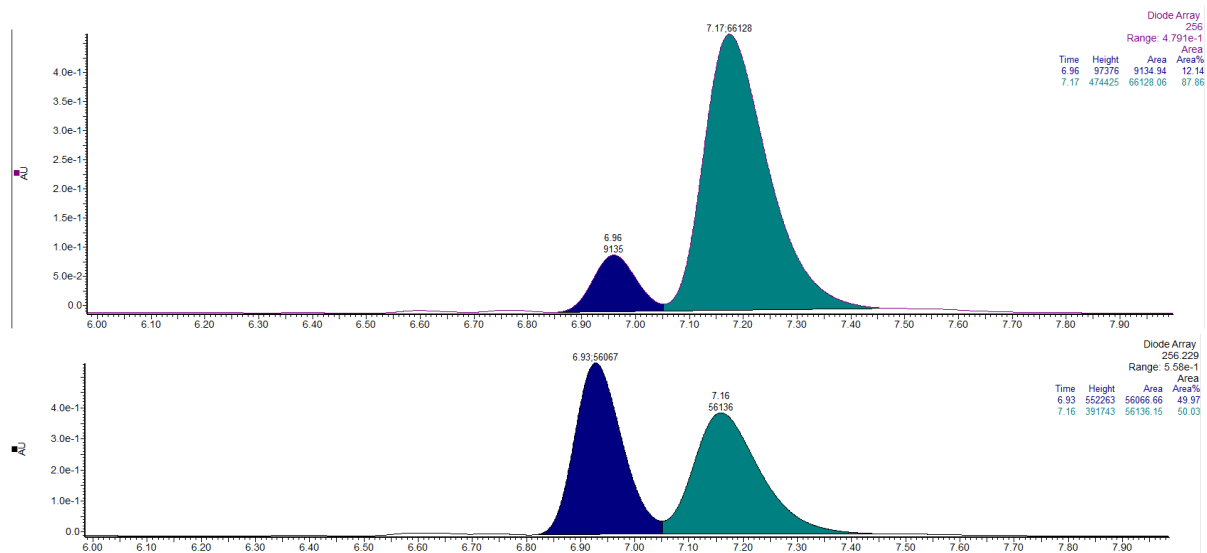

Supplementary Figure 67: UPC<sup>2</sup> Traces of 6t, diastereomer 2.

## Derivatization of 1,6-Dicarbonyl Products

### Separation of diastereomers

Lithium aluminium hydride (500  $\mu\text{mol}$ , 19.0 mg, 2.0 equiv.) was added portion wise to a solution of **6a** (250  $\mu\text{mol}$ , 99.0 mg, 1.0 equiv.) in anhydrous THF (1.0 mL) at 0 °C under an Argon atmosphere. The reaction mixture was allowed to warm to room temperature and was stirred for 3 h. The reaction mixture was then diluted with Et<sub>2</sub>O (20 mL), cooled to 0 °C and carefully quenched by addition of Glauber's salt (NaSO<sub>4</sub> · 10 H<sub>2</sub>O). After 10 min the solids were removed by filtration over a silica pad, which was thoroughly rinsed with EtOAc. The volatiles were removed under reduce pressure and the crude was purified by flash column chromatography (silica gel, 25-50% EtOAc in hexanes) to afford (2*R*,4*S*)-4-pentyl-2-phenylhexane-1,6-diol (**7a**, 25.0 mg, 38% yield, see x-ray analysis) and (2*S*,4*S*)-4-pentyl-2-phenylhexane-1,6-diol (**7b**, 21.0 mg, 32% yield) as colorless oils.

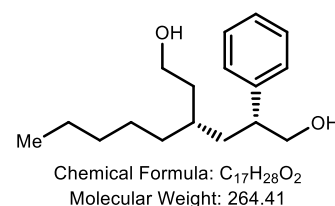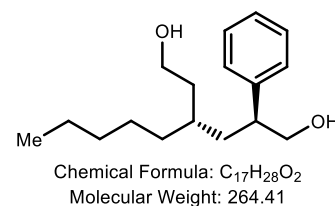

#### **7a:**

$[\alpha]_D^{26} = -34.1$  ( $c = 1.0$ , CHCl<sub>3</sub>, 93:7 e.r.).

<sup>1</sup>H NMR (400 MHz, CDCl<sub>3</sub>):  $\delta = 7.36 - 7.28$  (m, 2H), 7.25 – 7.17 (m, 3H), 3.75 – 3.64 (m, 2H), 3.59 – 3.51 (m, 2H), 2.93 – 2.84 (m, 1H), 1.62 – 1.56 (m, 2H), 1.56 – 1.47 (m, 2H), 1.47 – 1.37 (m, 2H), 1.32 – 1.15 (m, 7H), 0.87 (t,  $J = 7.1$  Hz, 3H) ppm. <sup>13</sup>C NMR (101 MHz, CDCl<sub>3</sub>):  $\delta = 142.6$ , 128.9, 128.2, 126.9, 68.1, 61.1, 46.4, 37.3, 36.5, 33.4, 32.4, 31.7, 25.7, 22.8, 14.2 ppm.

HRMS (ESI):  $m/z$  calculated for [C<sub>17</sub>H<sub>28</sub>O<sub>2</sub>Na]<sup>+</sup> [M+Na]<sup>+</sup>: 287.1982; found: 287.1972.

#### **7b:**

$[\alpha]_D^{26} = +6.6$  ( $c = 1.0$ , CHCl<sub>3</sub>, 84:16 e.r.).

<sup>1</sup>H NMR (400 MHz, CDCl<sub>3</sub>):  $\delta = 7.36 - 7.28$  (m, 2H), 7.27 – 7.17 (m, 3H), 3.71 (d,  $J = 6.6$  Hz, 2H), 3.69 – 3.51 (m, 2H), 2.95 – 2.84 (m, 1H), 1.61 (t,  $J = 7.0$  Hz, 2H), 1.59 – 1.45 (m, 2H), 1.39 – 1.09 (m, 9H), 0.85 (t,  $J = 7.2$  Hz, 3H). <sup>13</sup>C NMR (101 MHz, CDCl<sub>3</sub>):  $\delta = 142.8$ , 128.8, 128.2, 126.9, 68.0, 60.9, 46.2, 36.5, 36.3, 34.6, 32.2, 32.0, 26.2, 22.8, 14.2.

HRMS (ESI):  $m/z$  calculated for [C<sub>17</sub>H<sub>28</sub>O<sub>2</sub>Na]<sup>+</sup> [M+Na]<sup>+</sup>: 287.1982; found: 287.1973.

## Organocatalytic Asymmetric Conjugate Allylation of Enals

### Methyl (S)-2-methylene-4-(2-oxoethyl)nonanoate (**9**)

To a 8.0 mL argon-purged glass vial, containing acrylate **8** (24.0 mg, 100  $\mu\text{mol}$ ), octenal **1a** (59.6  $\mu\text{L}$ , 400  $\mu\text{mol}$ , 4.0 equiv.), DHP **R-1** (48.5 mg, 150  $\mu\text{mol}$ , 1.5 equiv.), 4-CzIPN (1.0 mg, 1.0  $\mu\text{mol}$ , 1 mol%) and amine catalyst **A-3** (14.0 mg, 20.0  $\mu\text{mol}$ , 20 mol%), was added 200  $\mu\text{L}$  of dimethoxyethane,  $\text{H}_2\text{O}$  (5.5  $\mu\text{L}$ , 300  $\mu\text{mol}$ , 3 equiv.) and trichloroacetic acid (3.0  $\mu\text{L}$ , 30.0  $\mu\text{mol}$ , 30 mol%). The vial was sealed with Parafilm, and then placed into a cooled aluminium support mounted on an aluminium block fitted with a 460 nm high-power single LED ( $\lambda = 460 \text{ nm}$ , irradiance = 90  $\text{mW}/\text{cm}^2$ , as controlled by an external power supply; the set-up is detailed in **Supplementary Figure 1**). The reaction was stirred under visible light irradiation at 5  $^\circ\text{C}$  internal temperature for 16 hours. The product was purified by flash column chromatography (silica, 5% EtOAc in n-hexanes) to obtain **9** as a colorless oil (13.5 mg, 60% yield). The enantiomeric ratio of the corresponding 2,4-dinitrophenylhydrazone derivative (prepared following the general procedure of  $\beta$ -cyanoaldehydes **2a**), was determined to be 90.0:10.0 by UPC<sup>2</sup> analysis on a Daicel Chiralpak IE-3 column (eluent: 100%  $\text{CO}_2$  for 1 min, gradient 100% - 60%  $\text{CO}_2$  in EtOH for 5 min, 60%  $\text{CO}_2$  in  $\text{CH}_3\text{CN}$  for 2 min, gradient 60% - 100%  $\text{CO}_2$  in EtOH for 1 min; flow rate 2.0 mL/min,  $\lambda = 348 \text{ nm}$ ,  $\tau_{\text{Major}} = 6.60 \text{ min}$ ,  $\tau_{\text{Minor}} = 6.25 \text{ min}$ ).

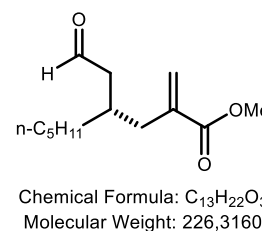

$[\alpha]_{\text{D}}^{25} = -0.9$  (c = 0.1,  $\text{CHCl}_3$ , 90:10 e.r.).

$^1\text{H NMR}$  (500 MHz,  $\text{CDCl}_3$ ):  $\delta = 9.74$  (t,  $J = 2.2 \text{ Hz}$ , 1H), 6.22 (d,  $J = 1.5 \text{ Hz}$ , 1H), 5.55 (d,  $J = 1.3 \text{ Hz}$ , 1H), 3.76 (s, 3H), 2.50 – 2.42 (m, 1H), 2.40 – 2.27 (m, 2H), 2.25 – 2.20 (m, 1H), 2.18 – 2.16 (m, 1H), 1.39 – 1.23 (m, 8H), 0.88 (t,  $J = 7.1 \text{ Hz}$ , 3H) ppm.  $^{13}\text{C NMR}$  (126 MHz,  $\text{CDCl}_3$ ):  $\delta = 203.0$ , 167.6, 138.9, 127.2, 52.1, 48.1, 37.2, 34.3, 32.3, 32.1, 26.4, 22.7, 14.2 ppm.

**HRMS (ESI)**: m/z calculated for  $[\text{C}_{13}\text{H}_{22}\text{O}_3\text{Na}]^+$   $[\text{M}+\text{Na}]^+$ : 249.1461, found: 249.1452.

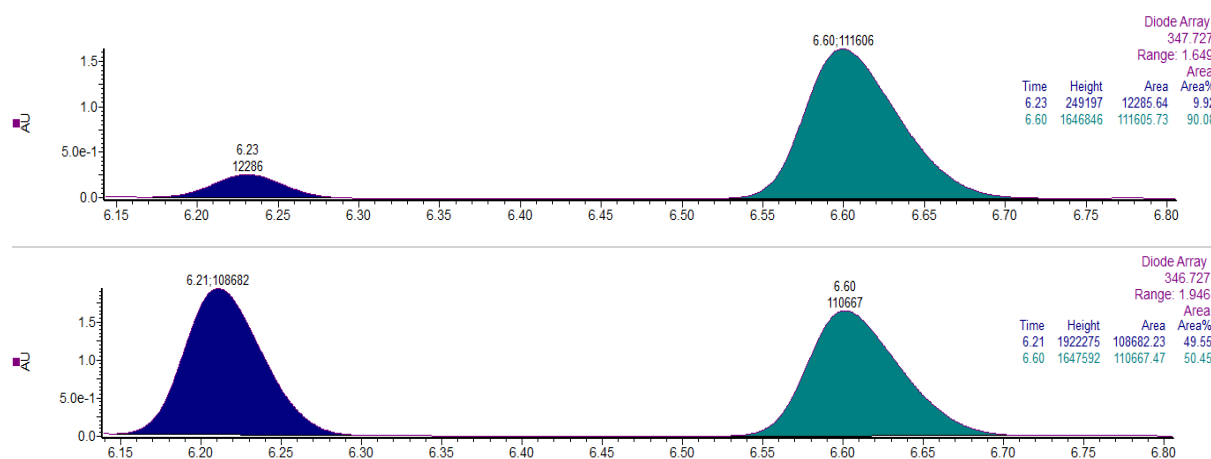

**Supplementary Figure 68: UPC<sup>2</sup> Traces of **9**.**

# NMR Spectra

$^1\text{H}$  NMR (400 MHz,  $\text{CDCl}_3$ ) of **1f**:

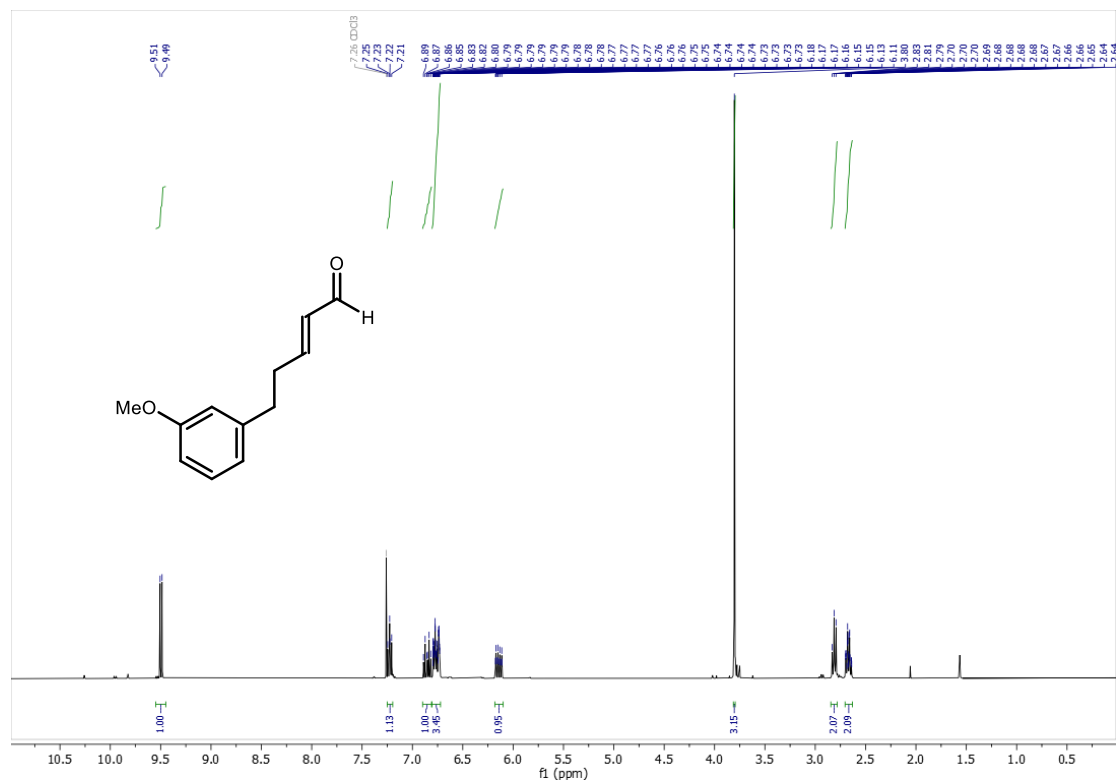

$^{13}\text{C}$  NMR (126 MHz,  $\text{CDCl}_3$ ) of **1f**:

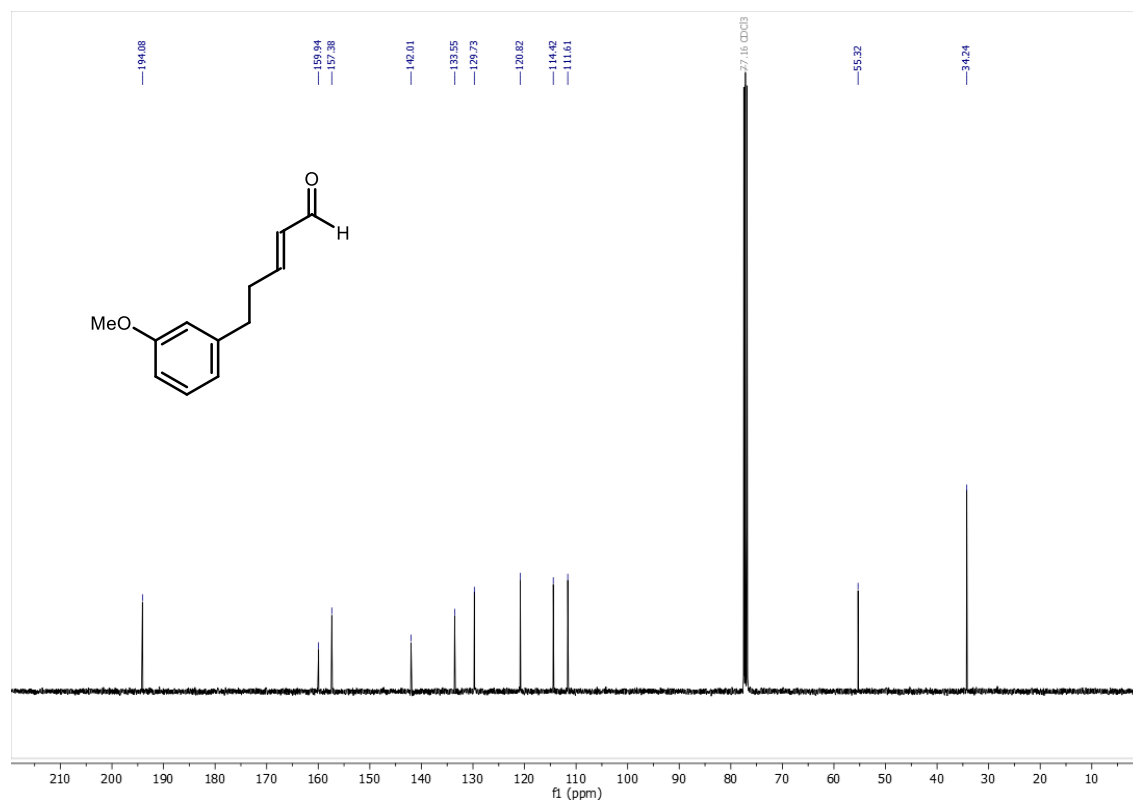

$^1\text{H}$  NMR (400 MHz,  $\text{CDCl}_3$ ) of **1g**:

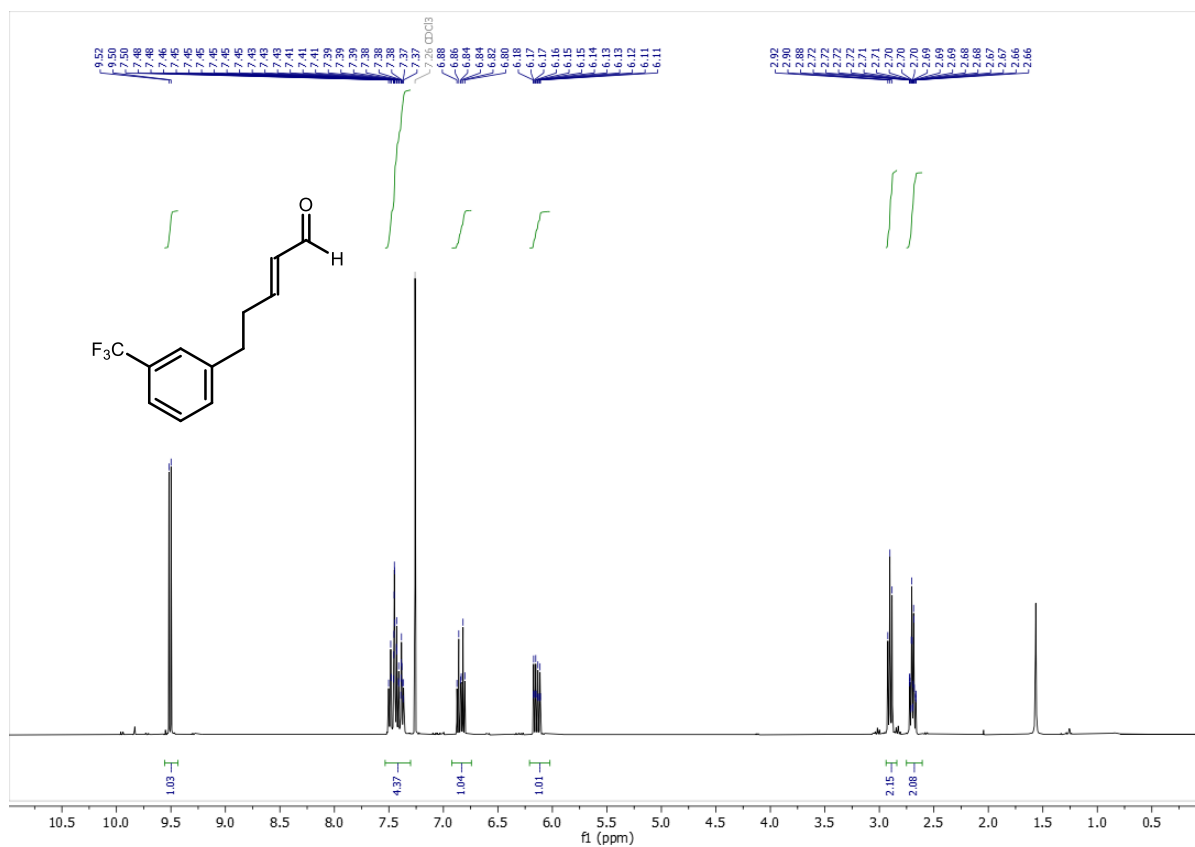

$^{13}\text{C}$  NMR (126 MHz,  $\text{CDCl}_3$ ) of **1g**:

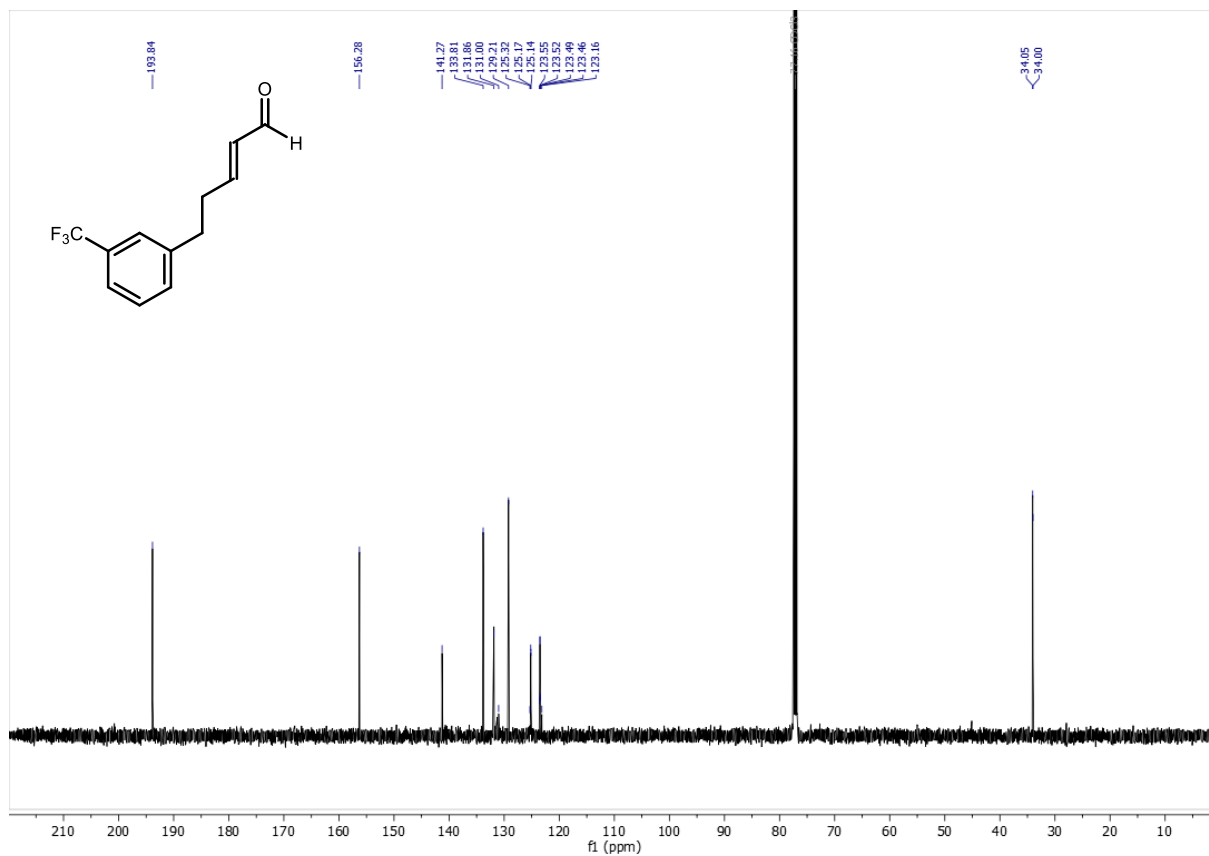

$^{19}\text{F}$  NMR (471 MHz,  $\text{CDCl}_3$ ) of **1g**:

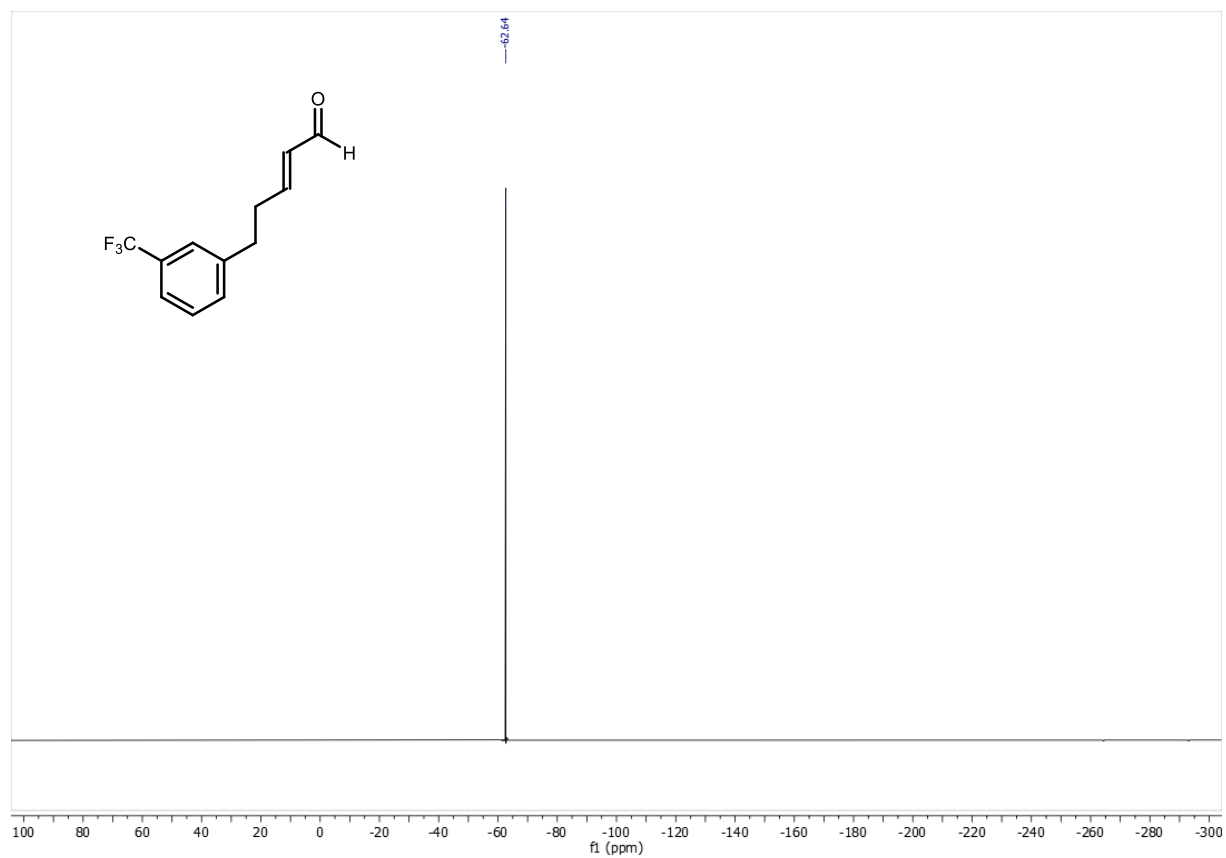

$^1\text{H}$  NMR (400 MHz,  $\text{CDCl}_3$ ) of **11**:

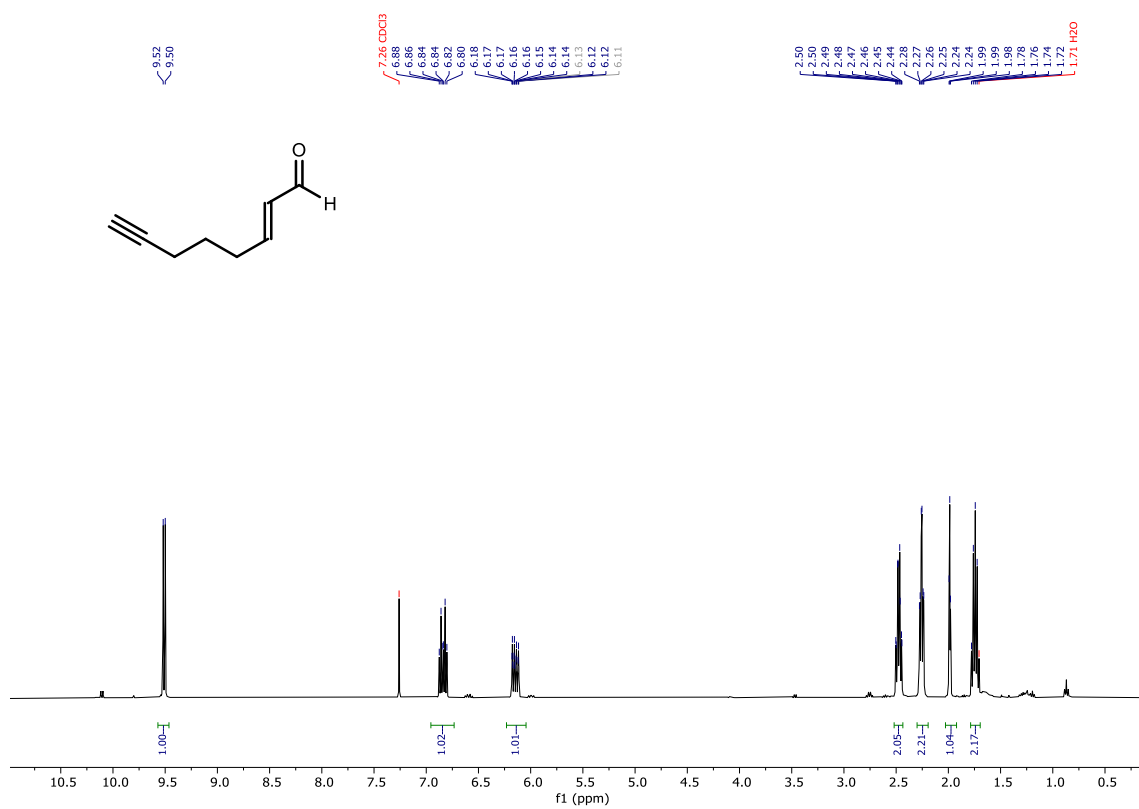

$^{13}\text{C}$  NMR (101 MHz,  $\text{CDCl}_3$ ) of **11**:

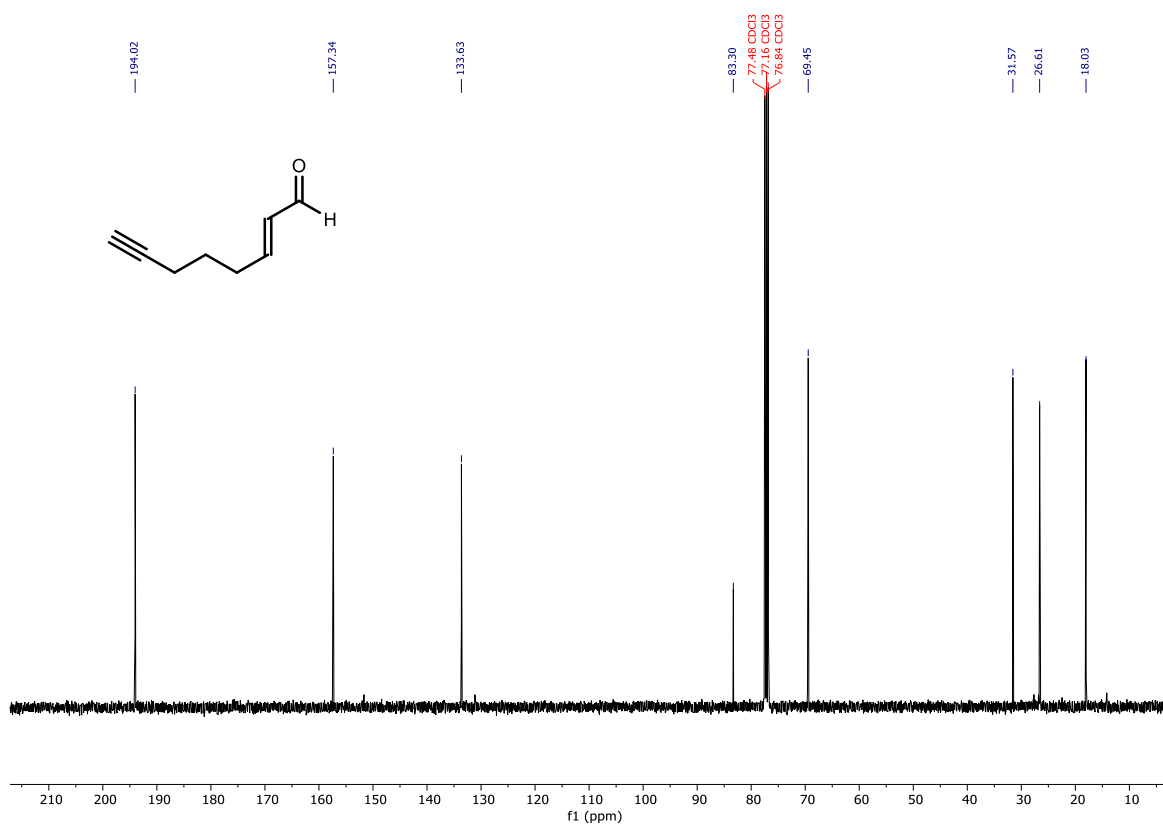



$^1\text{H}$  NMR (500 MHz,  $\text{CDCl}_3$ ) of **1m**:

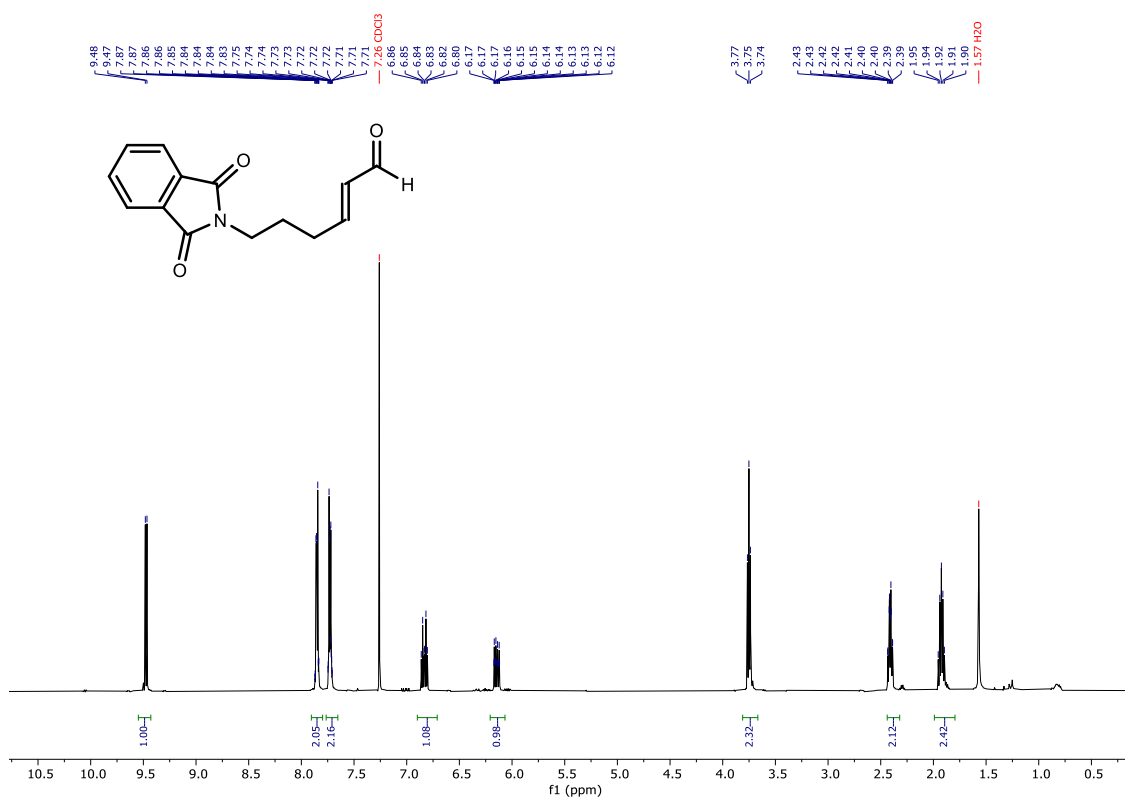

$^{13}\text{C}$  NMR (126 MHz,  $\text{CDCl}_3$ ) of **1m**:

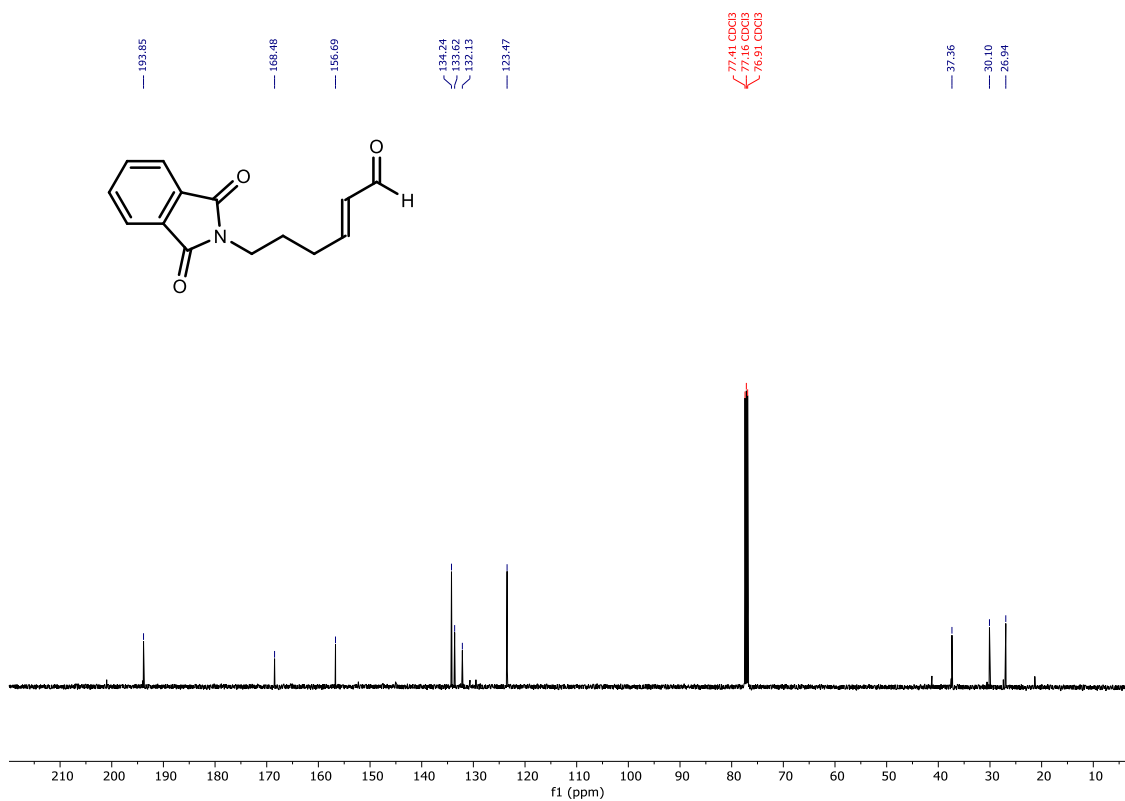

$^1\text{H}$  NMR (500 MHz,  $\text{CDCl}_3$ ,  $E/Z = 9:1$ ) of **1n**:

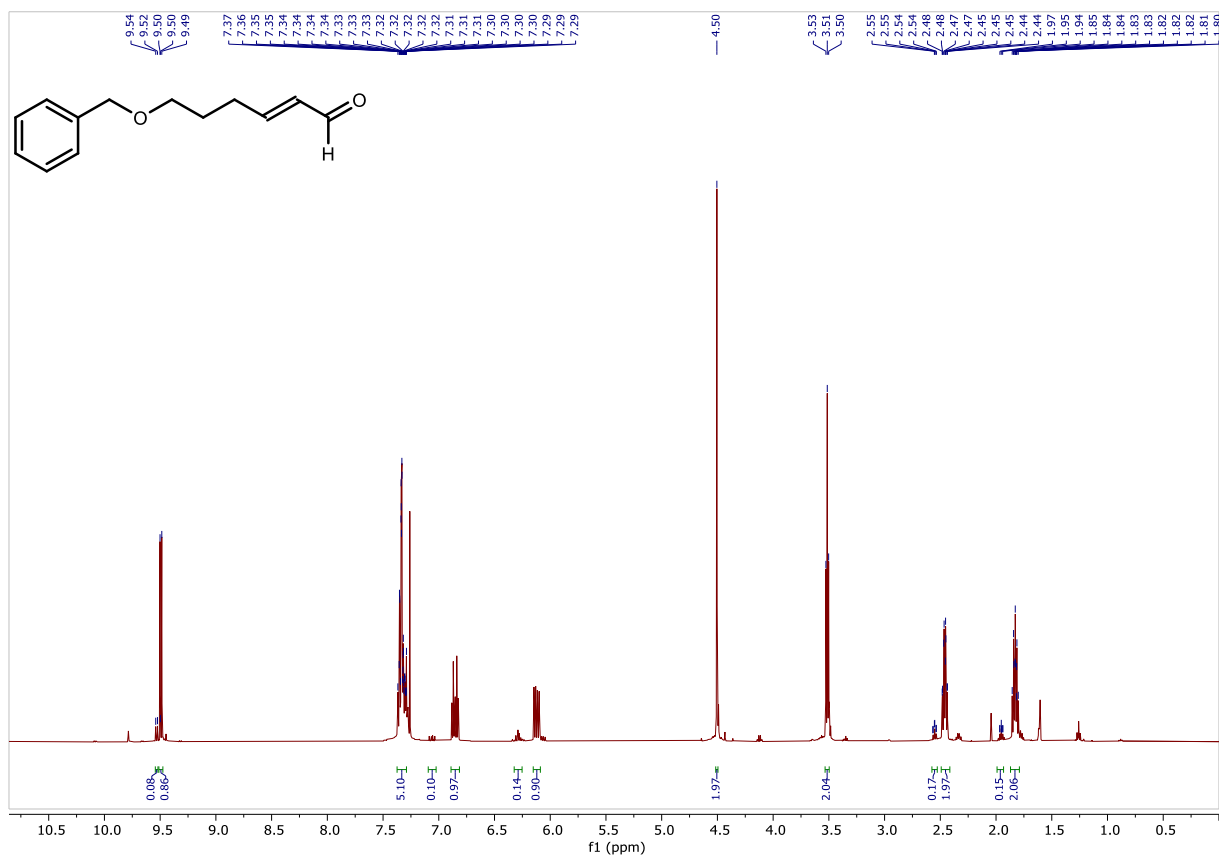

$^{13}\text{C}$  NMR (126 MHz,  $\text{CDCl}_3$ ,  $E/Z = 9:1$ ) of **1n**:

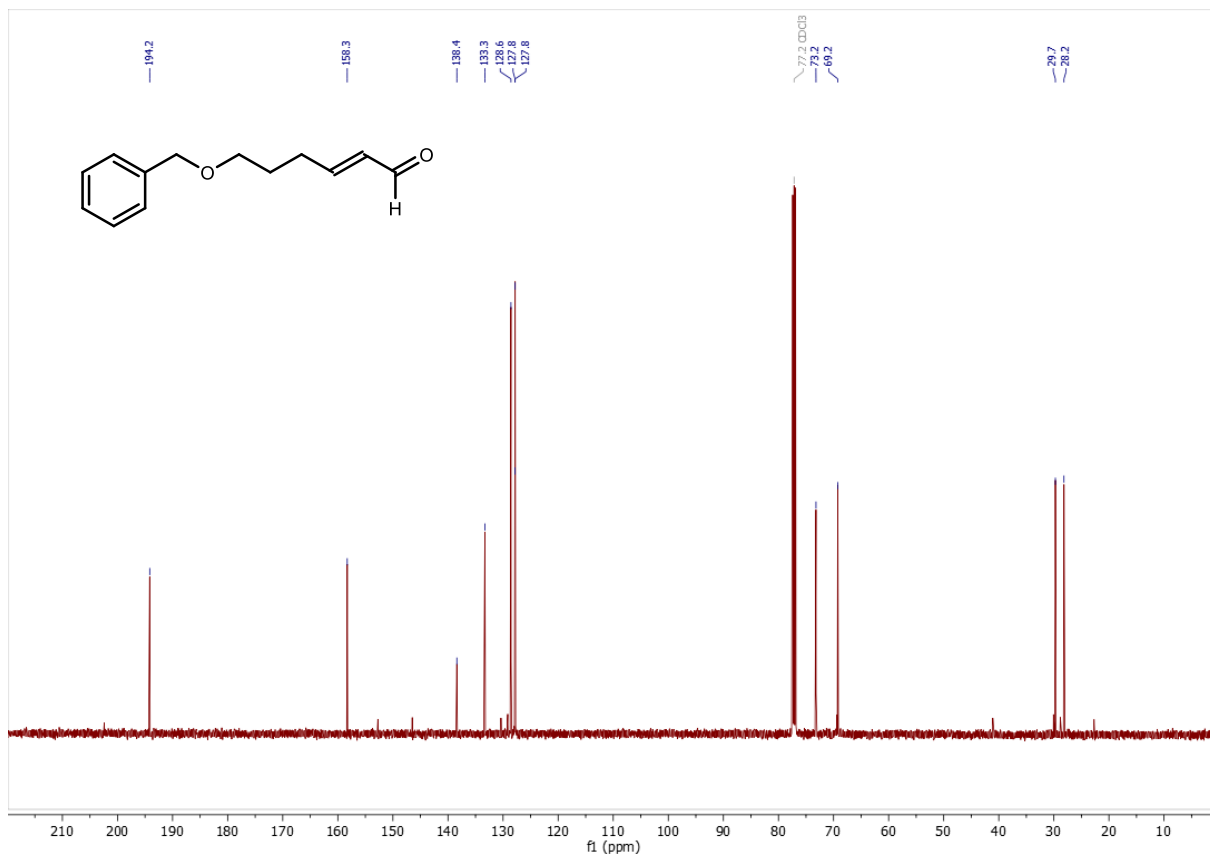

<sup>1</sup>H NMR (500 MHz, CDCl<sub>3</sub>) of **1p**:

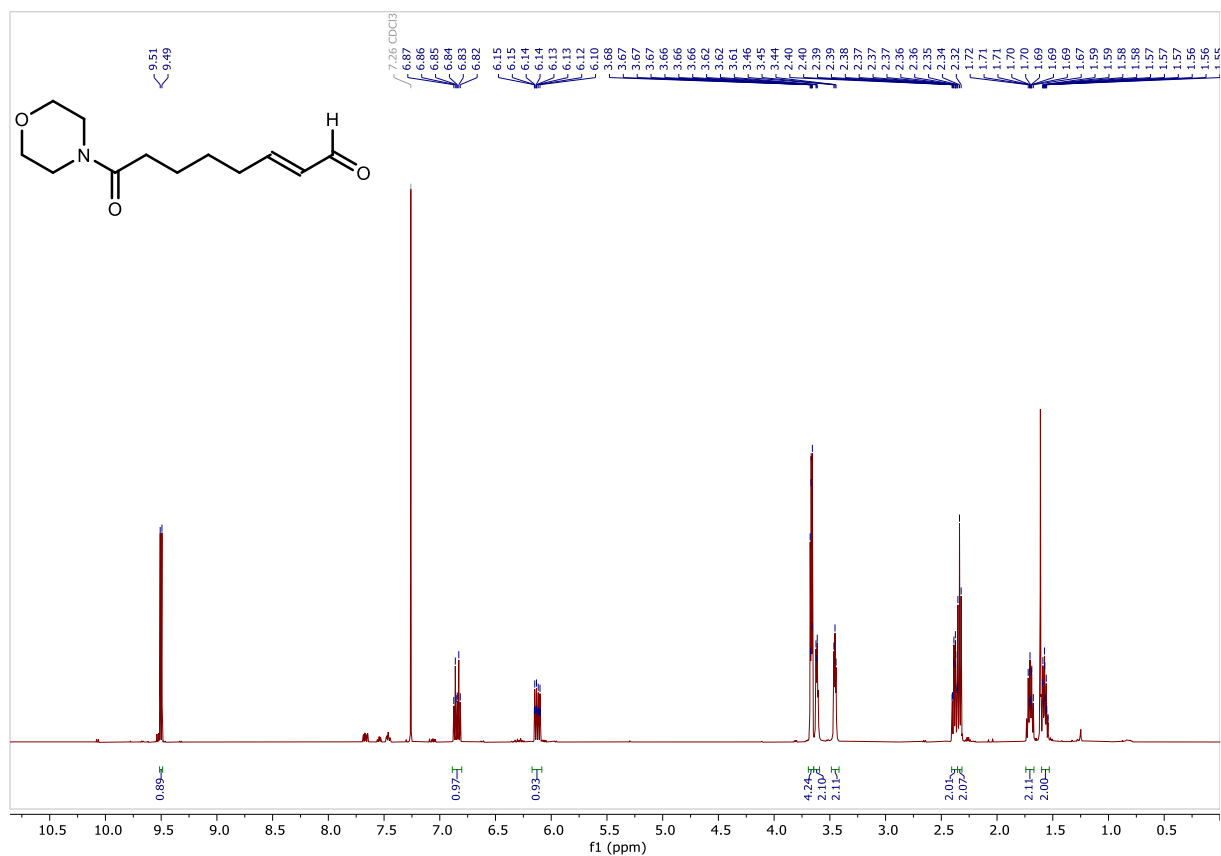

<sup>13</sup>C NMR (126 MHz, CDCl<sub>3</sub>) of **1p**:

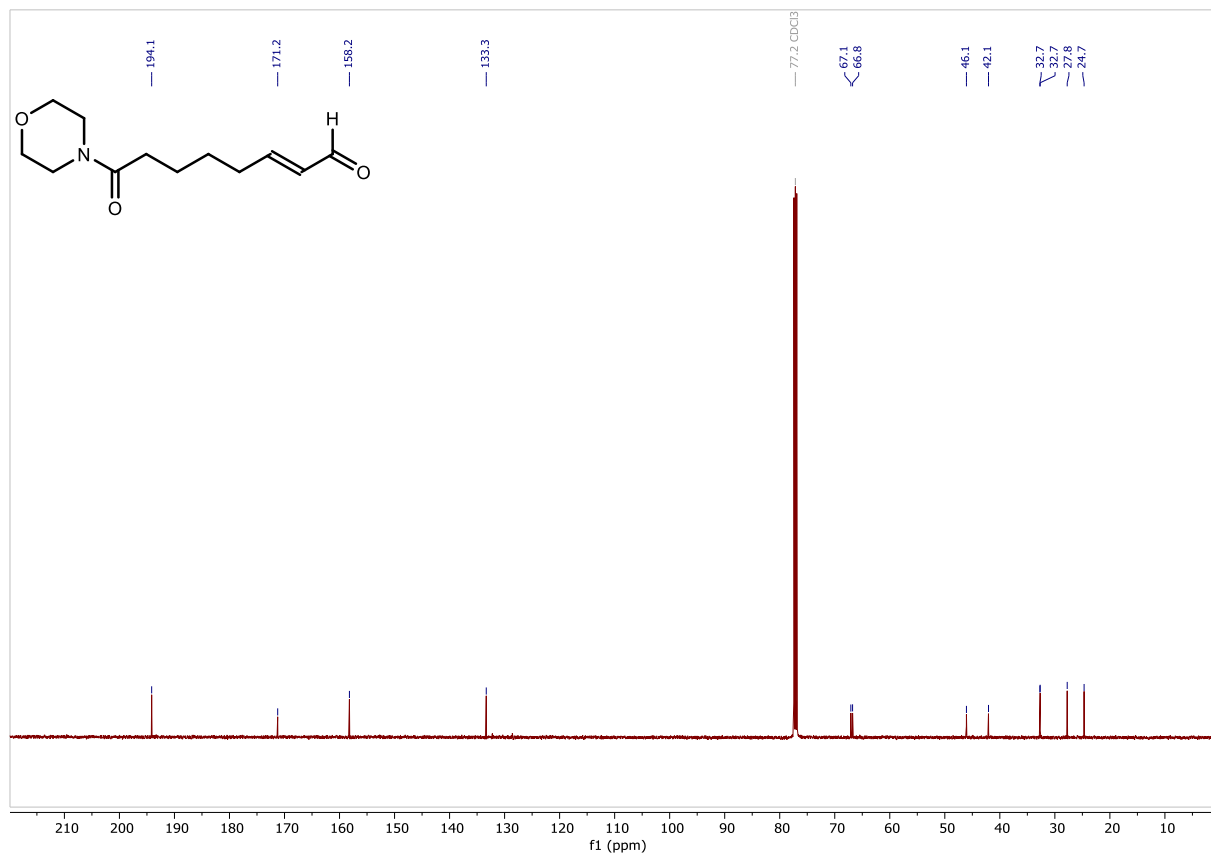

<sup>1</sup>H NMR (400 MHz, CDCl<sub>3</sub>) of **1r**:

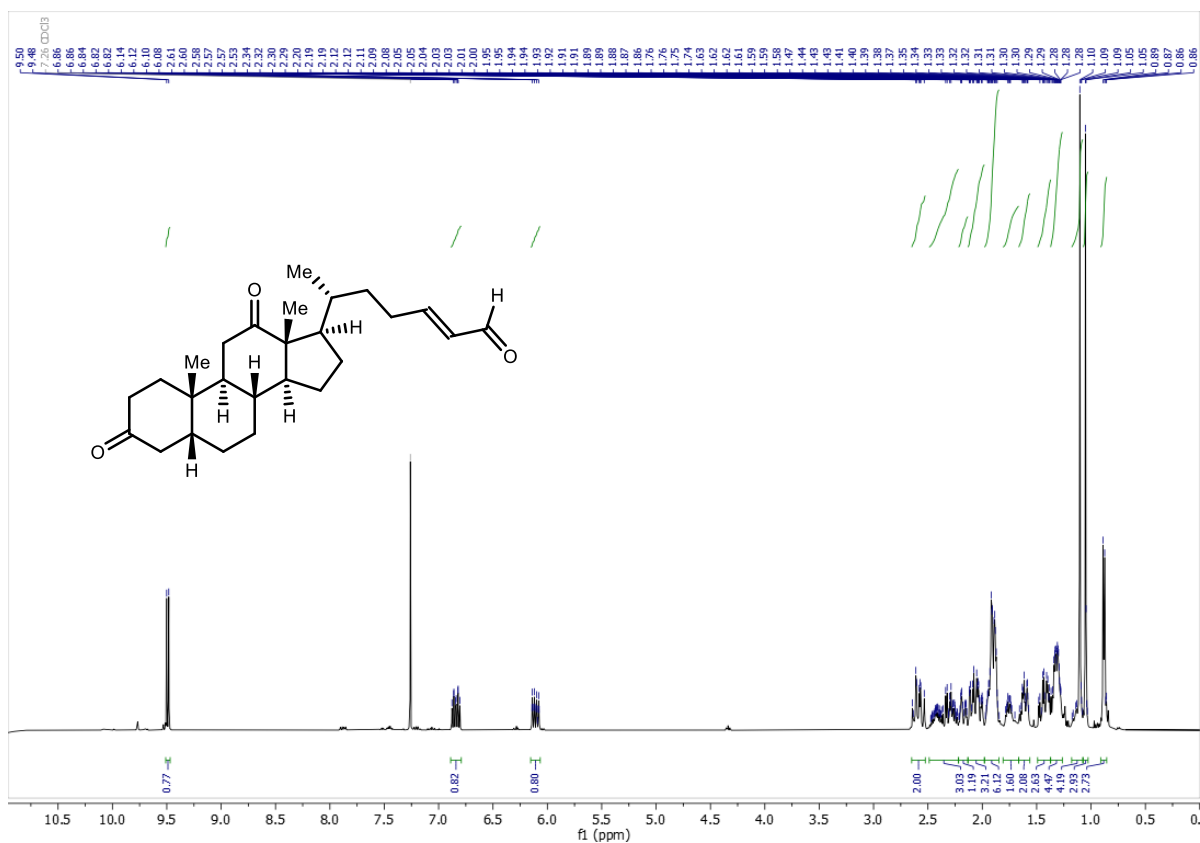

<sup>13</sup>C NMR (101 MHz, CDCl<sub>3</sub>) of **1r**:

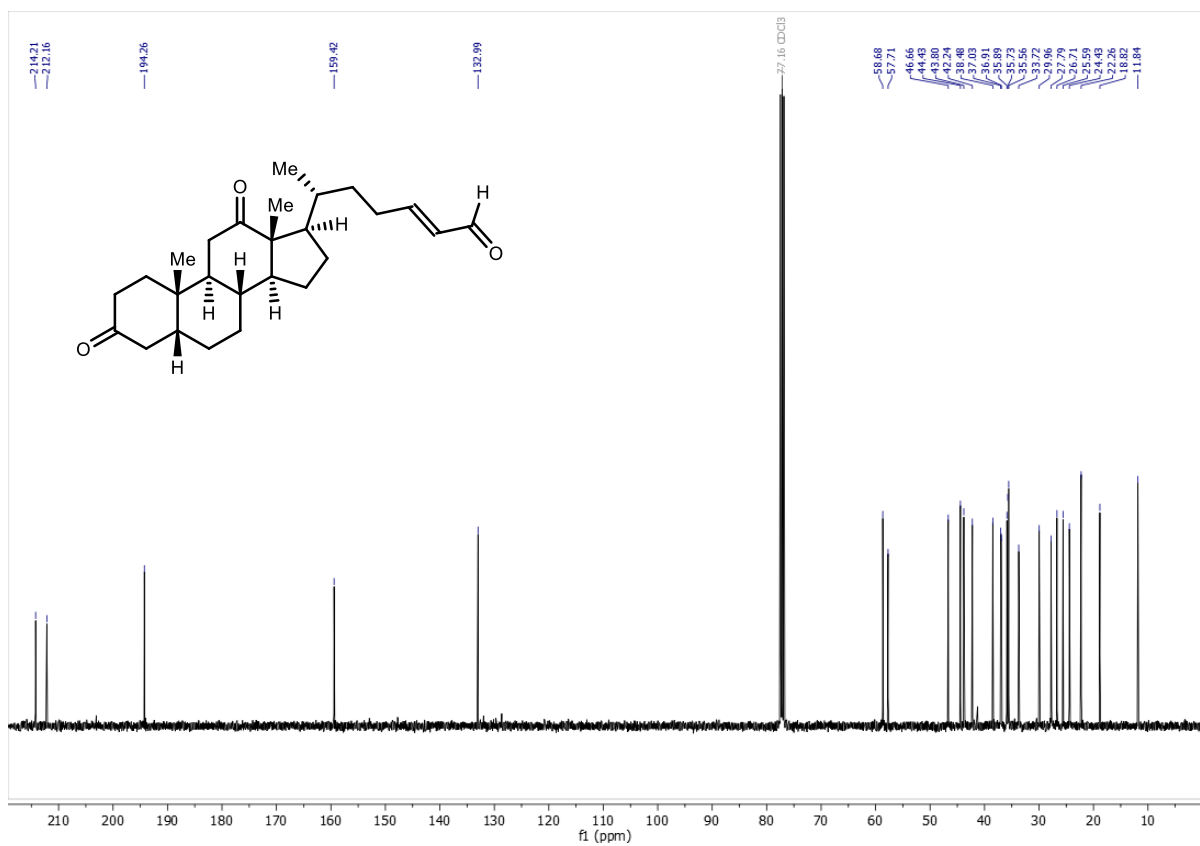

<sup>1</sup>H NMR (300 MHz, CDCl<sub>3</sub>) of **1s**:

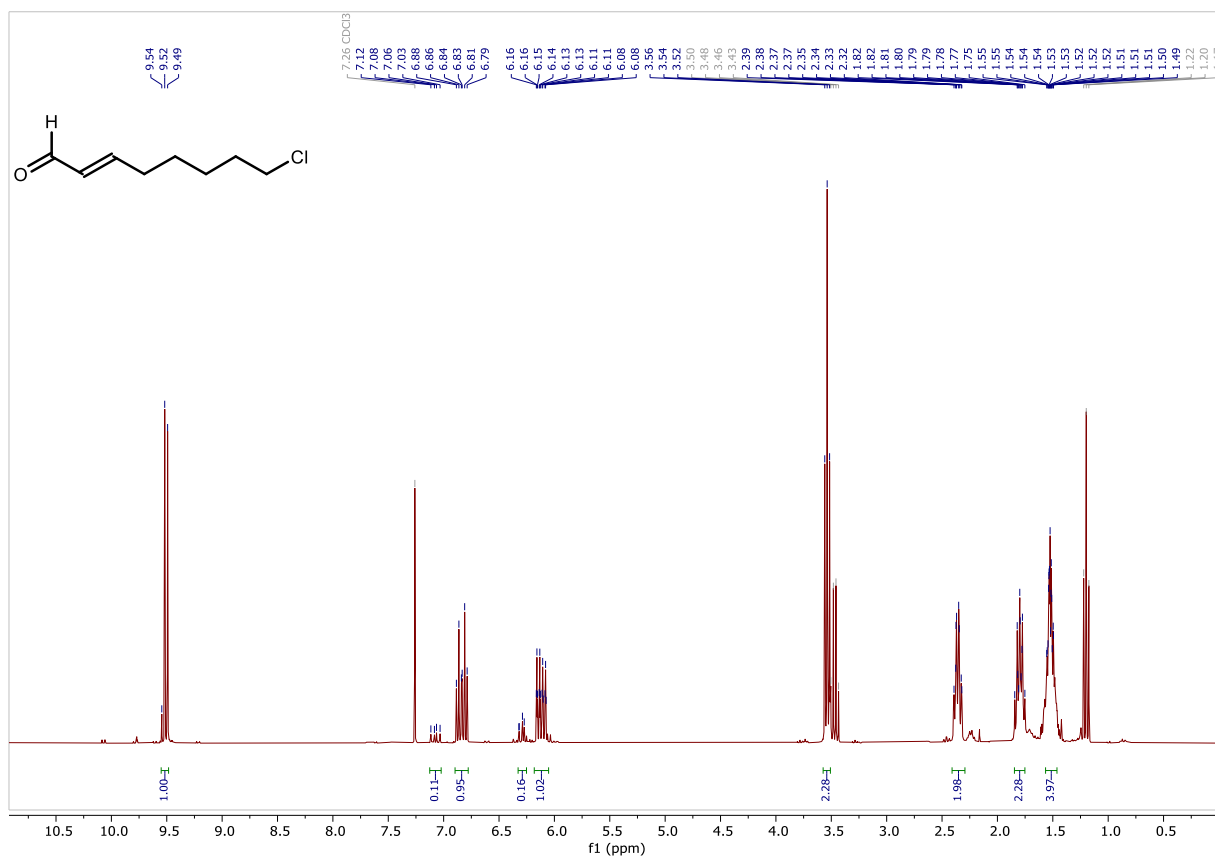

<sup>13</sup>C NMR (101 MHz, CDCl<sub>3</sub>) of **1s**:

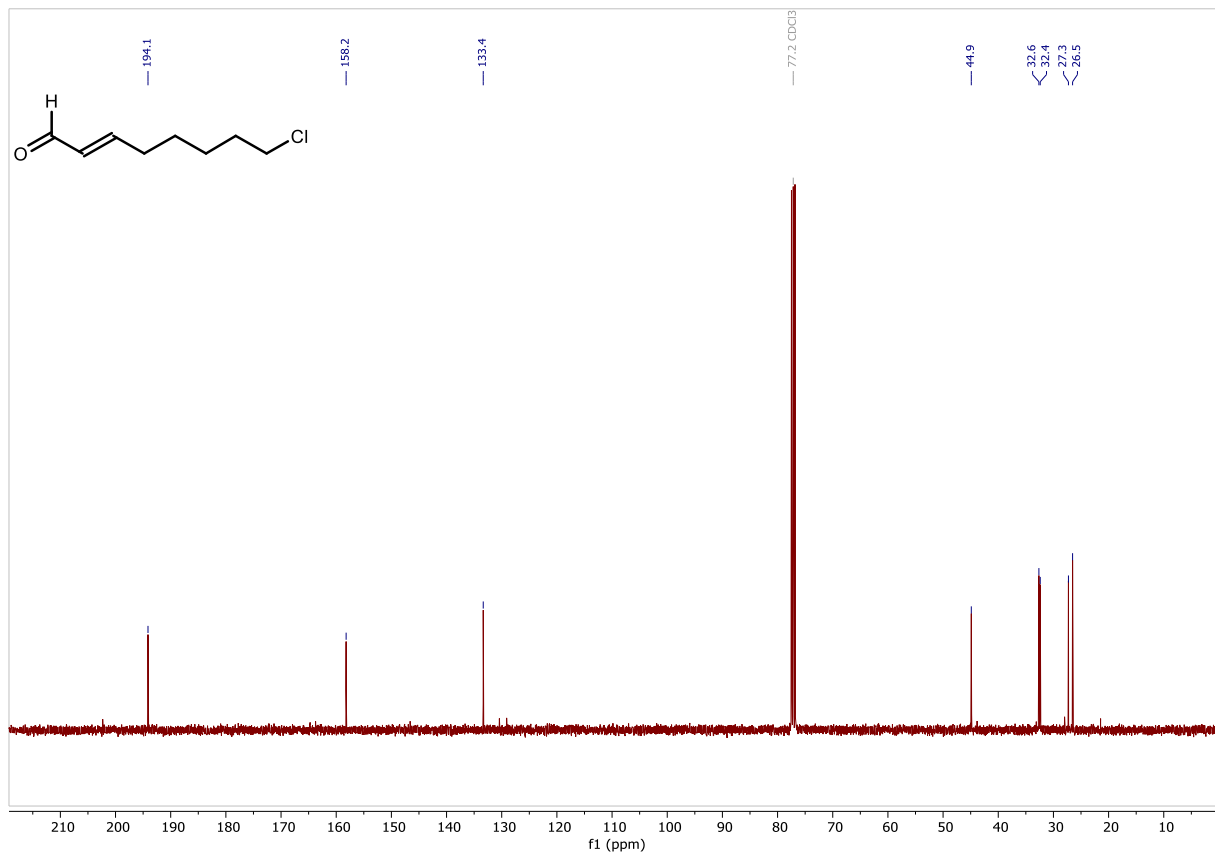

$^1\text{H}$  NMR (500 MHz,  $\text{CDCl}_3$ ) of **1t**:

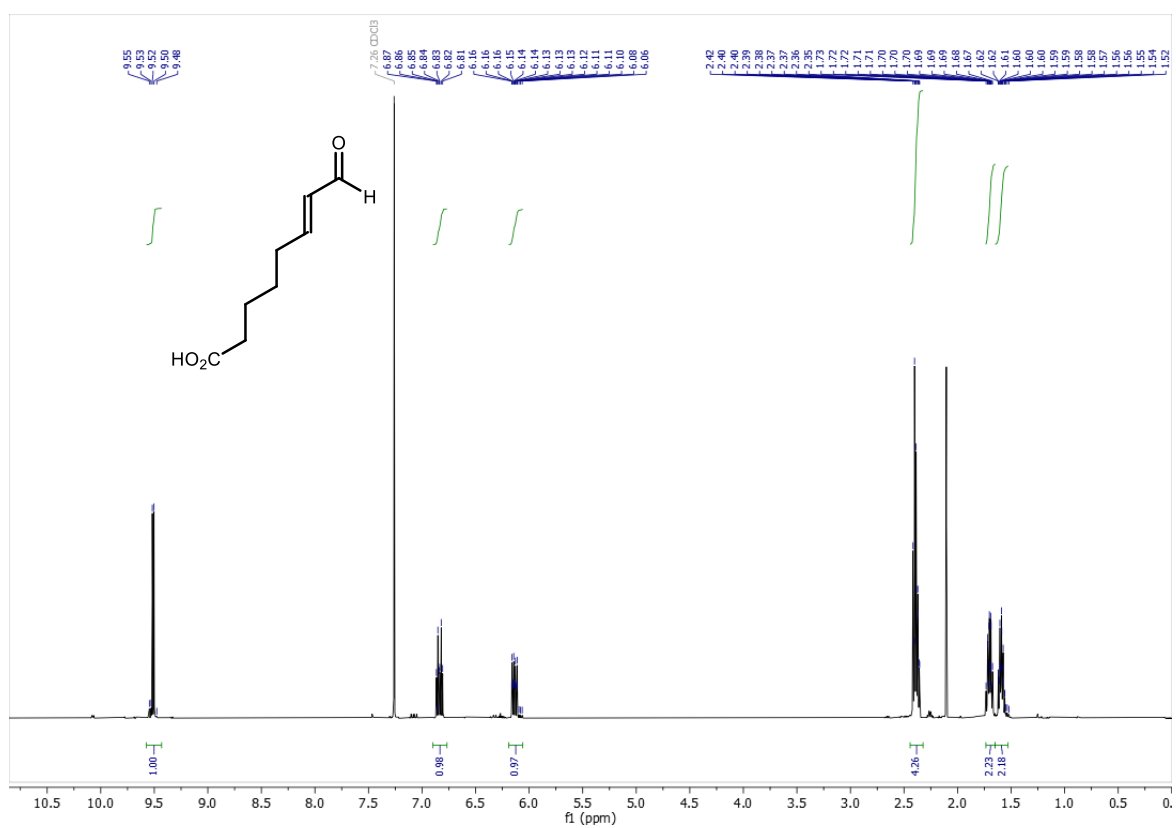

$^{13}\text{C}$  NMR (126 MHz,  $\text{CDCl}_3$ ) of **1t**:

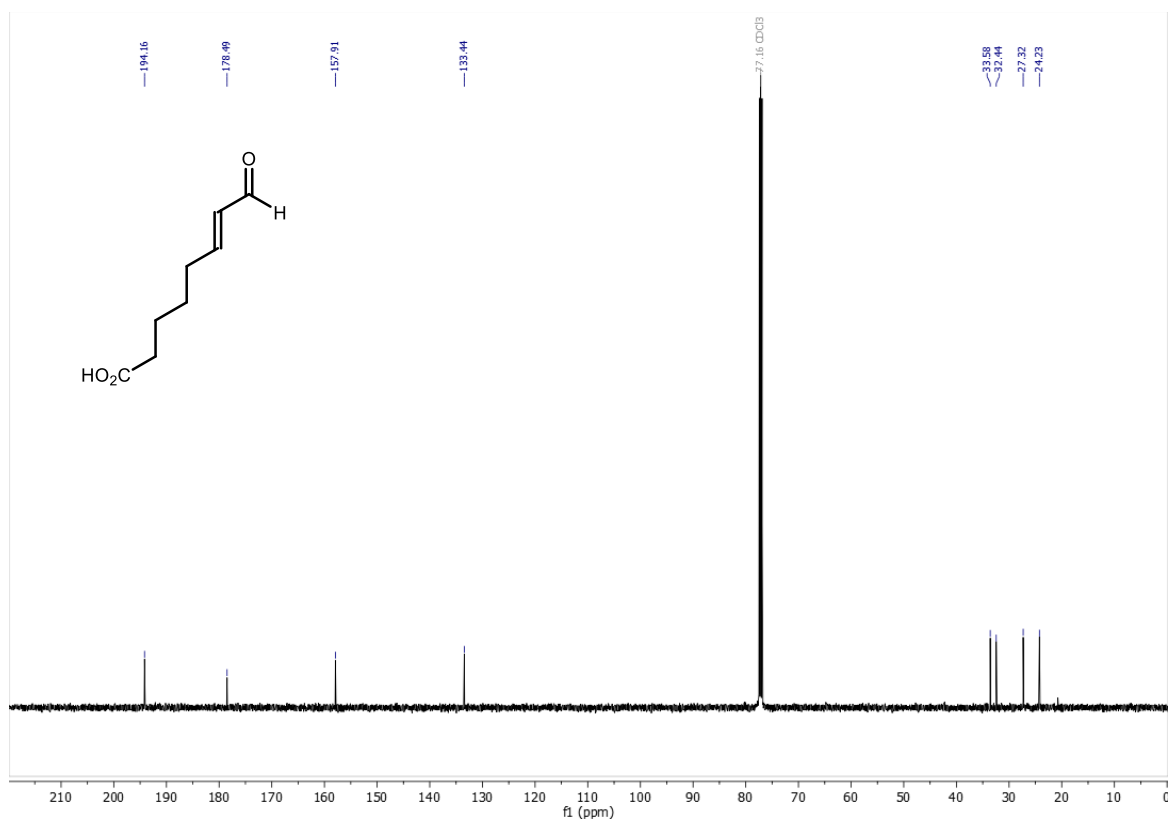

<sup>1</sup>H NMR (500 MHz, CDCl<sub>3</sub>) of precursor to **5e**:

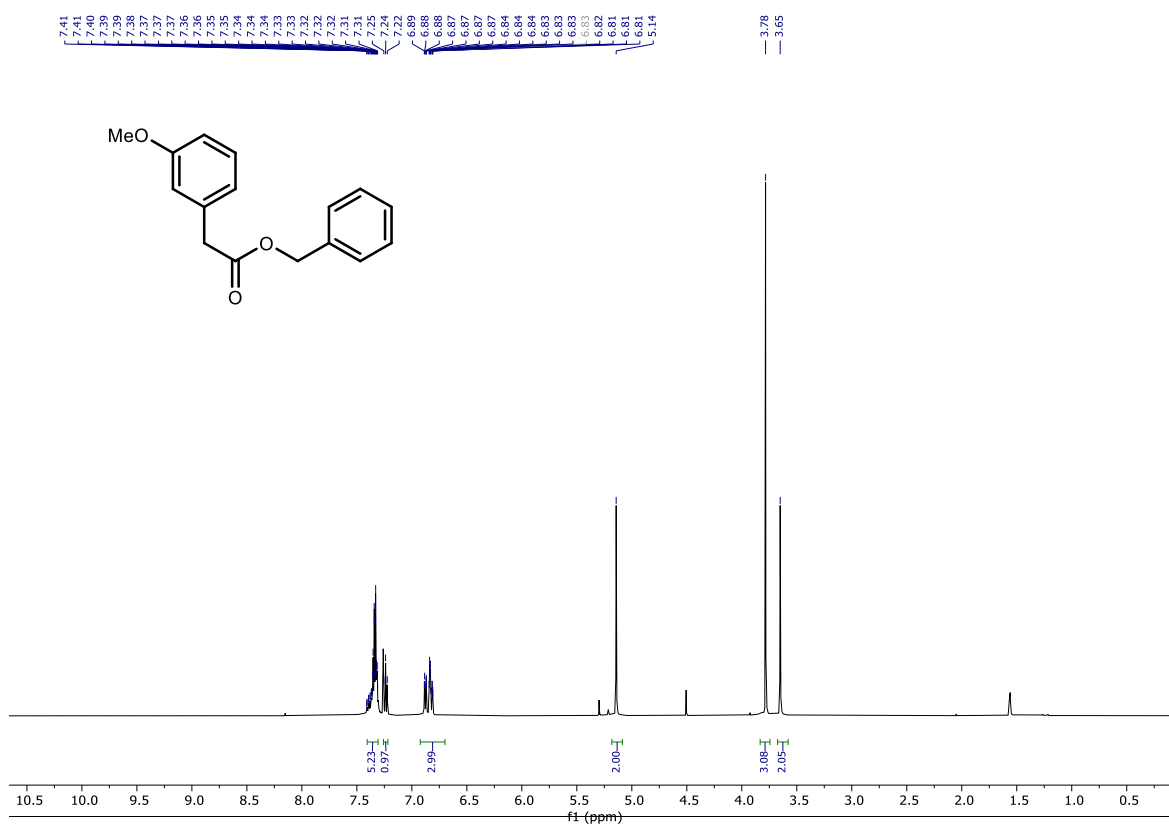

<sup>13</sup>C NMR (126 MHz, CDCl<sub>3</sub>) of precursor to **5e**:

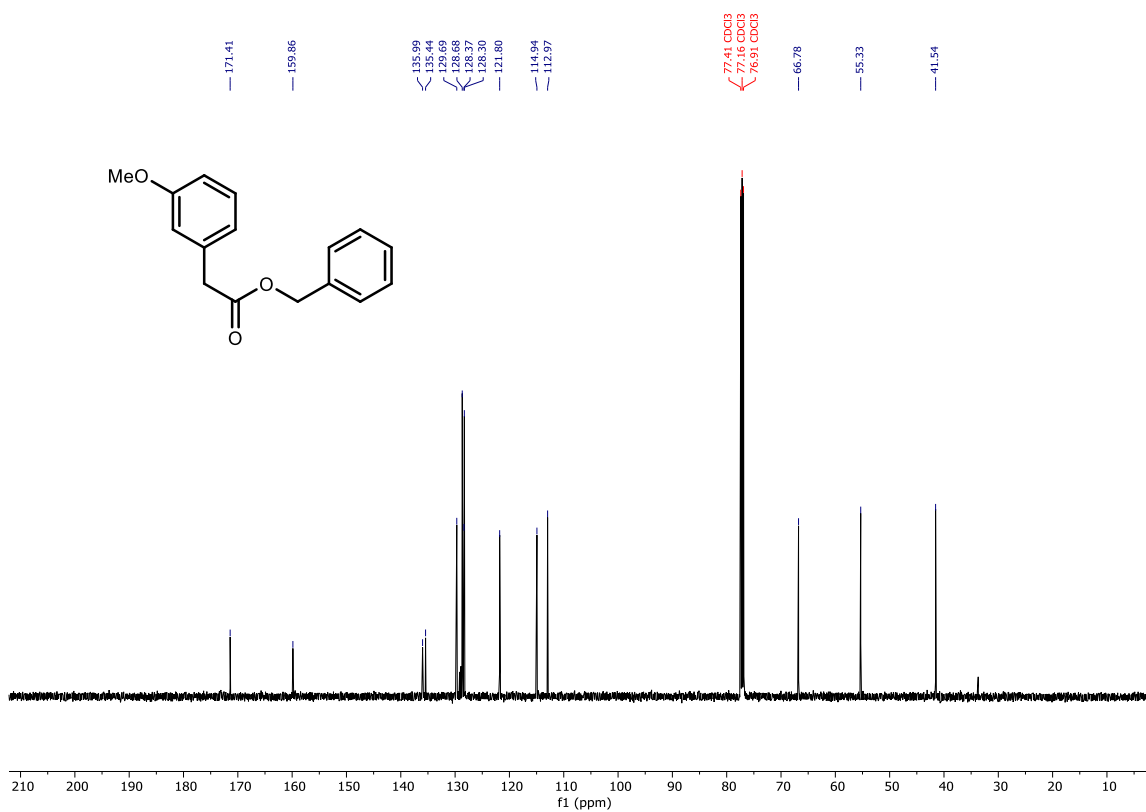

$^1\text{H}$  NMR (500 MHz,  $\text{CDCl}_3$ ) of **5e**:

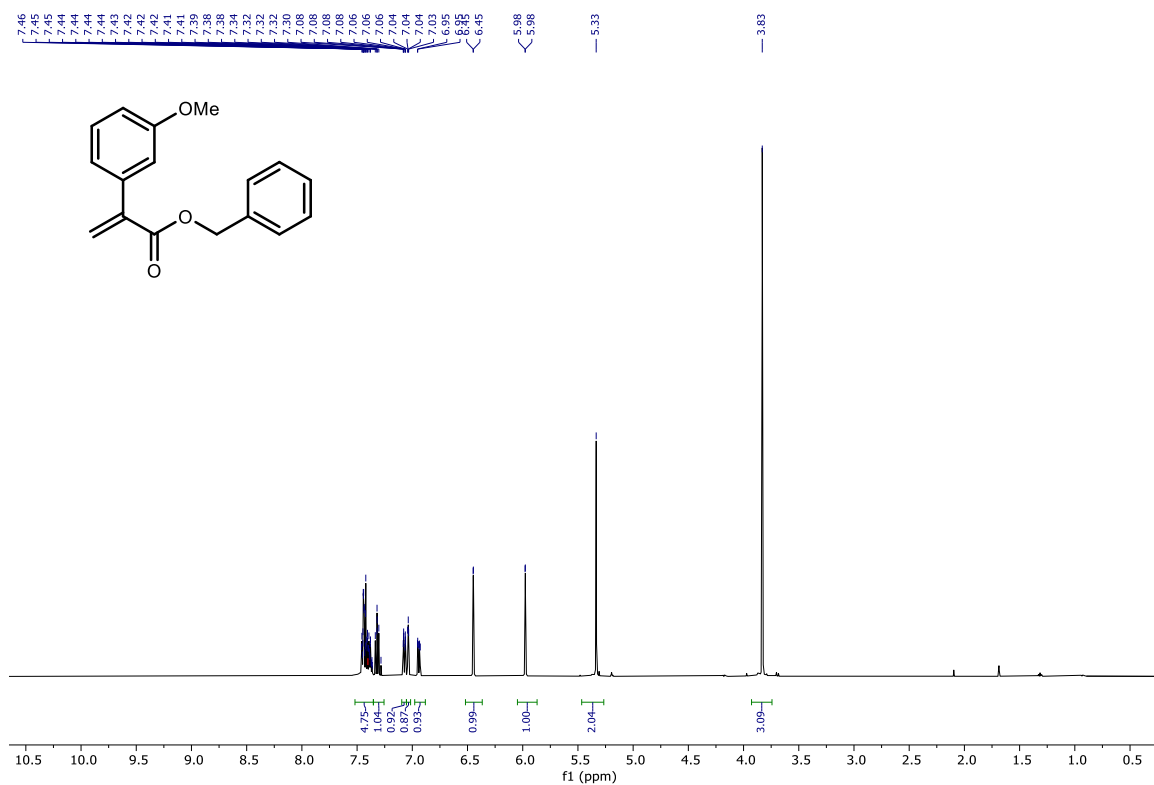

$^{13}\text{C}$  NMR (126 MHz,  $\text{CDCl}_3$ ) of **5e**:

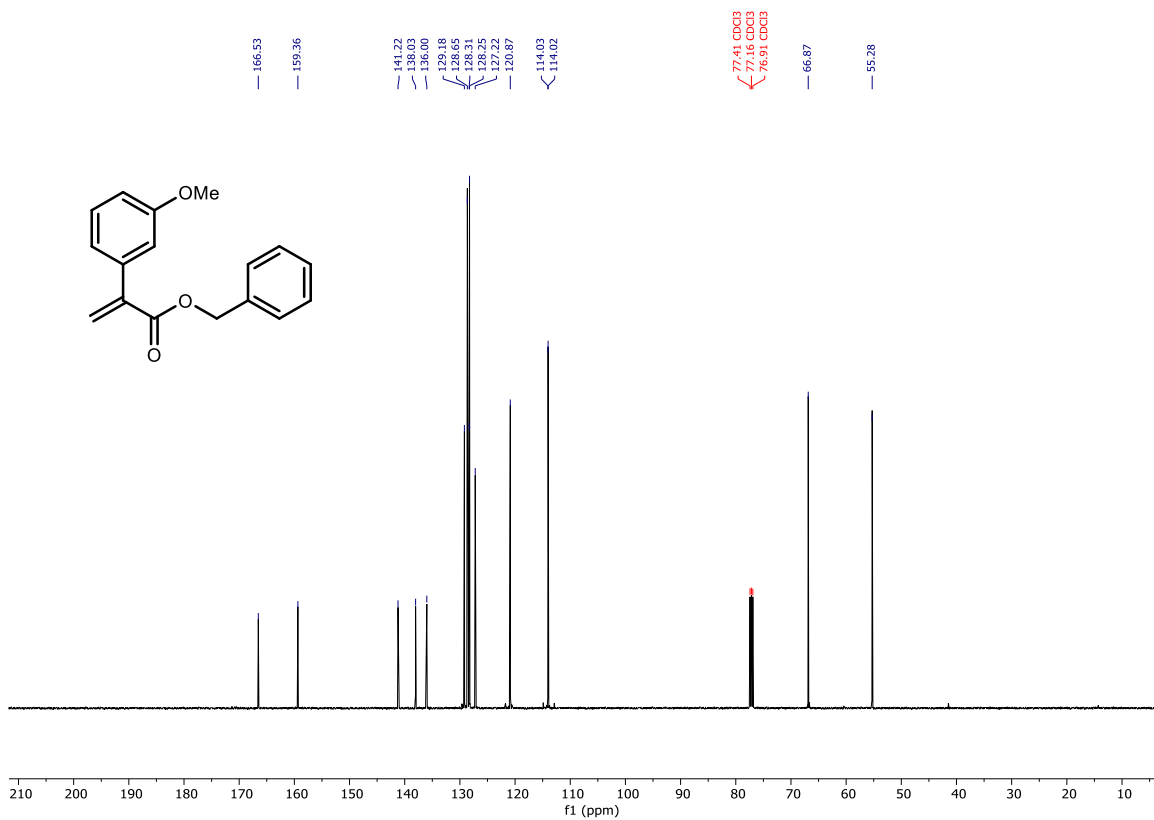



$^1\text{H}$  NMR (500 MHz,  $\text{CDCl}_3$ ) of **5f**:

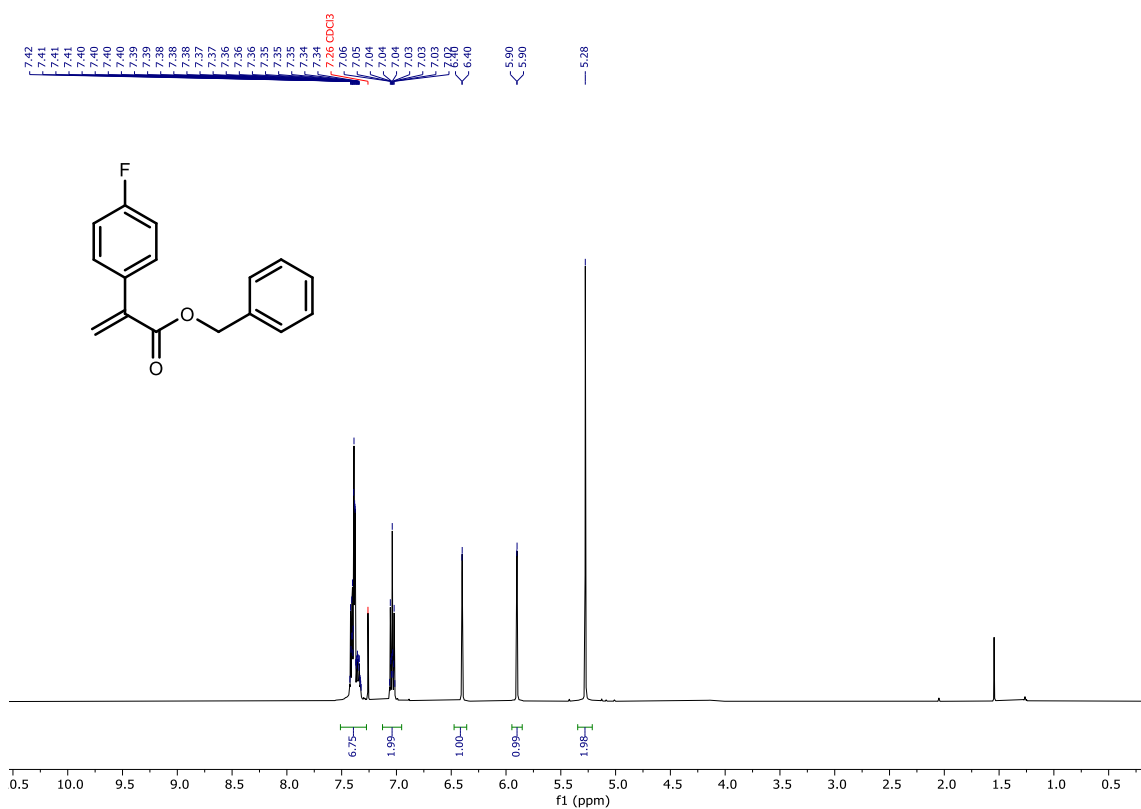

$^{13}\text{C}$  NMR (126 MHz,  $\text{CDCl}_3$ ) of **5f**:

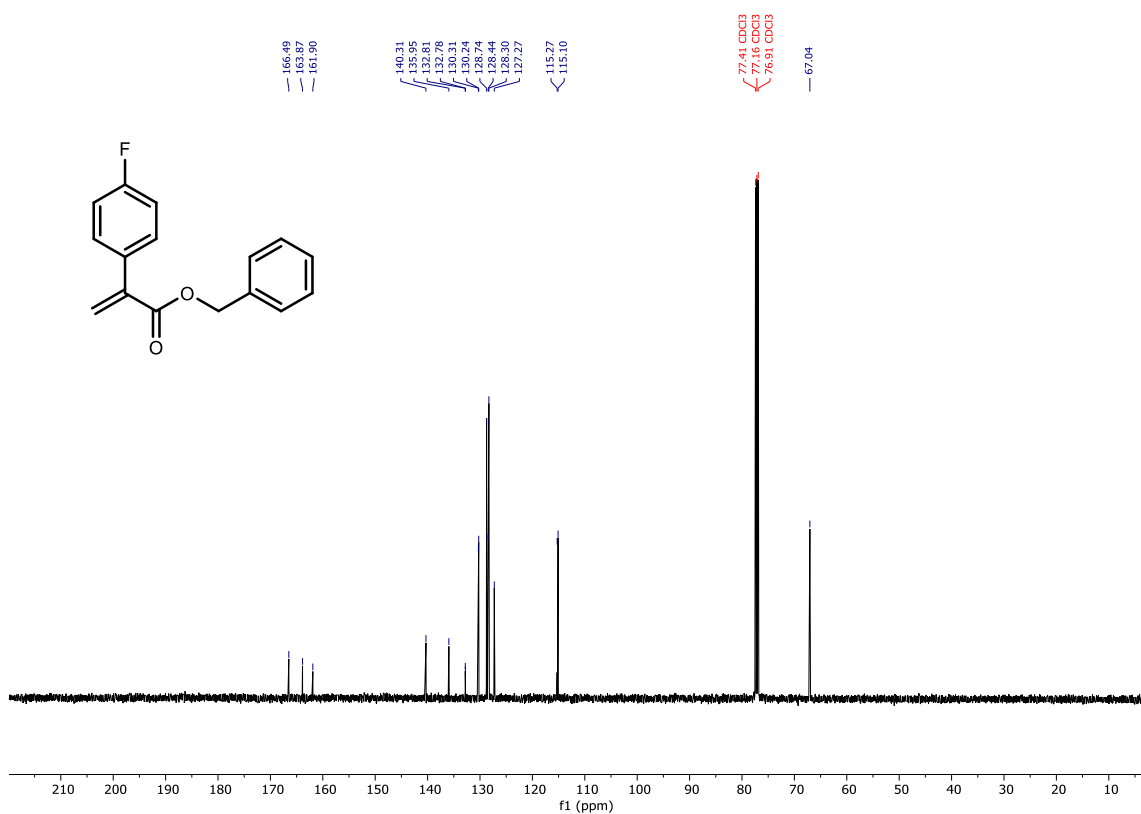

$^{19}\text{F}\{^1\text{H}\}$  NMR (471 MHz,  $\text{CDCl}_3$ ) of **5f**:

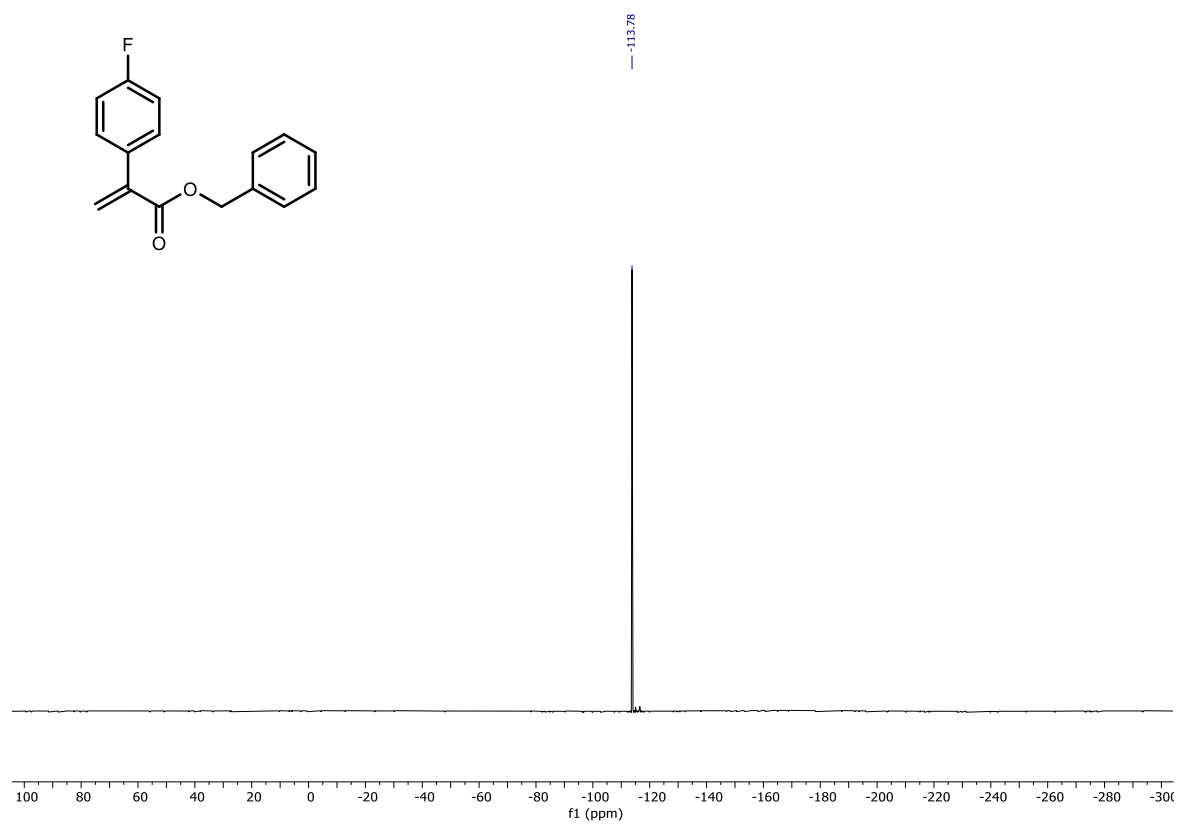

$^1\text{H}$  NMR (500 MHz,  $\text{CDCl}_3$ ) of **R-1**:

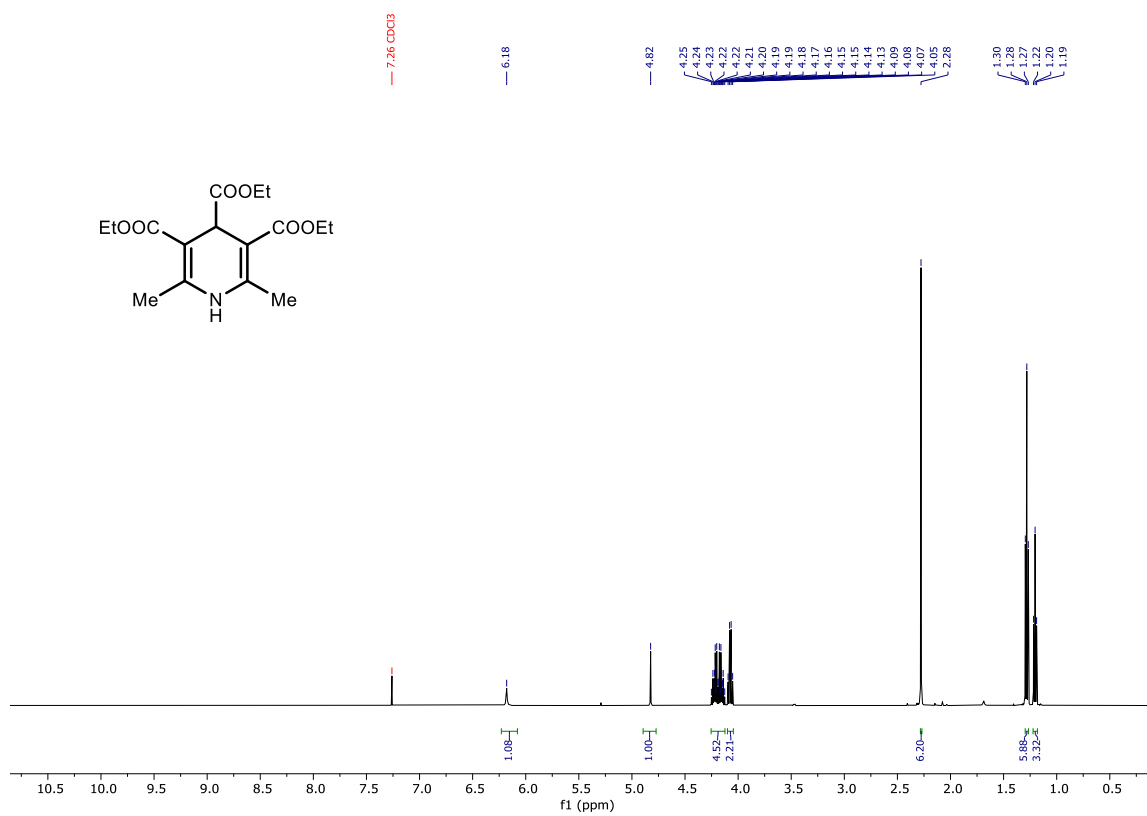

$^{13}\text{C}$  NMR (126 MHz,  $\text{CDCl}_3$ ) of **R-1**:

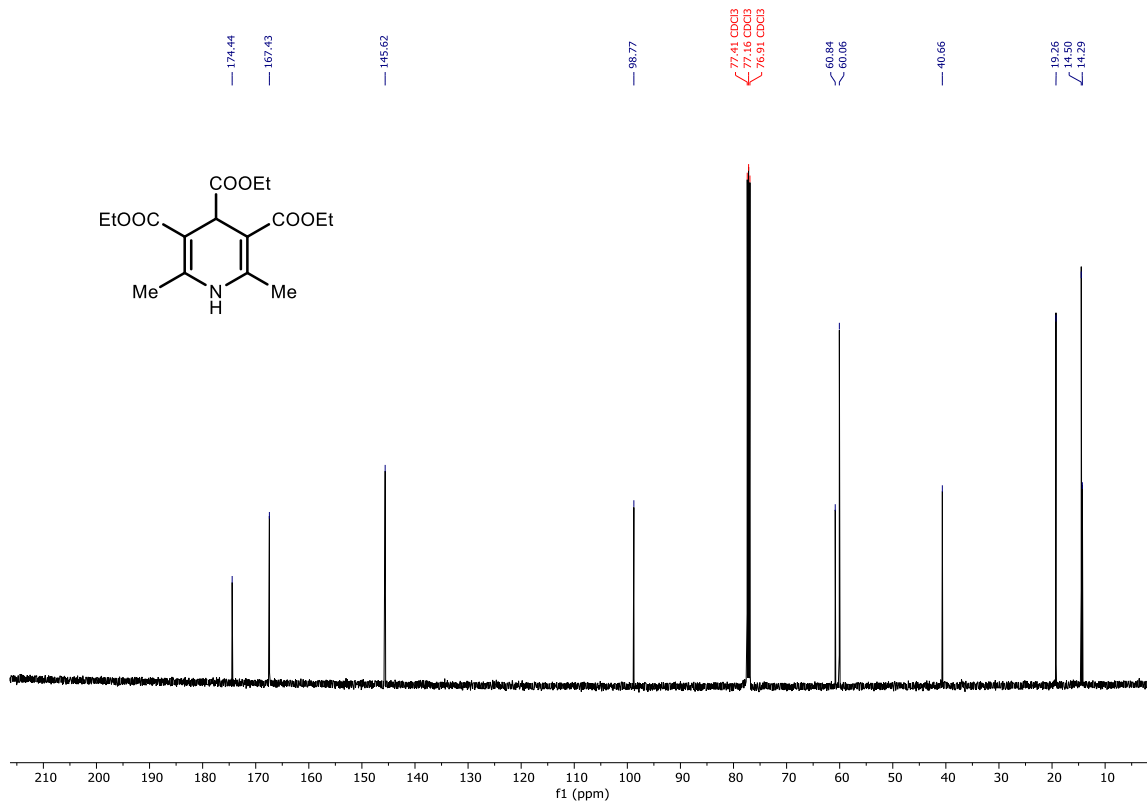

<sup>1</sup>H NMR (400 MHz, CDCl<sub>3</sub>) of **3a**:

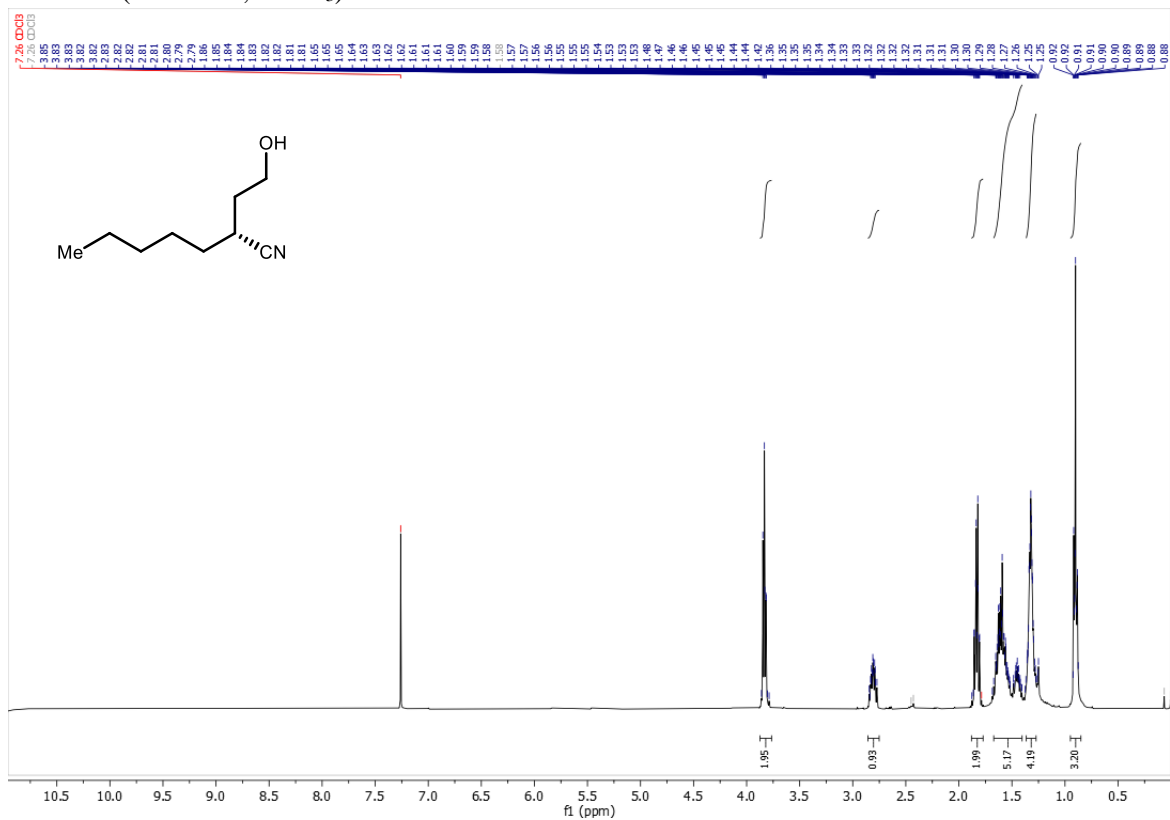

<sup>13</sup>C NMR (126 MHz, CDCl<sub>3</sub>) of **3a**:

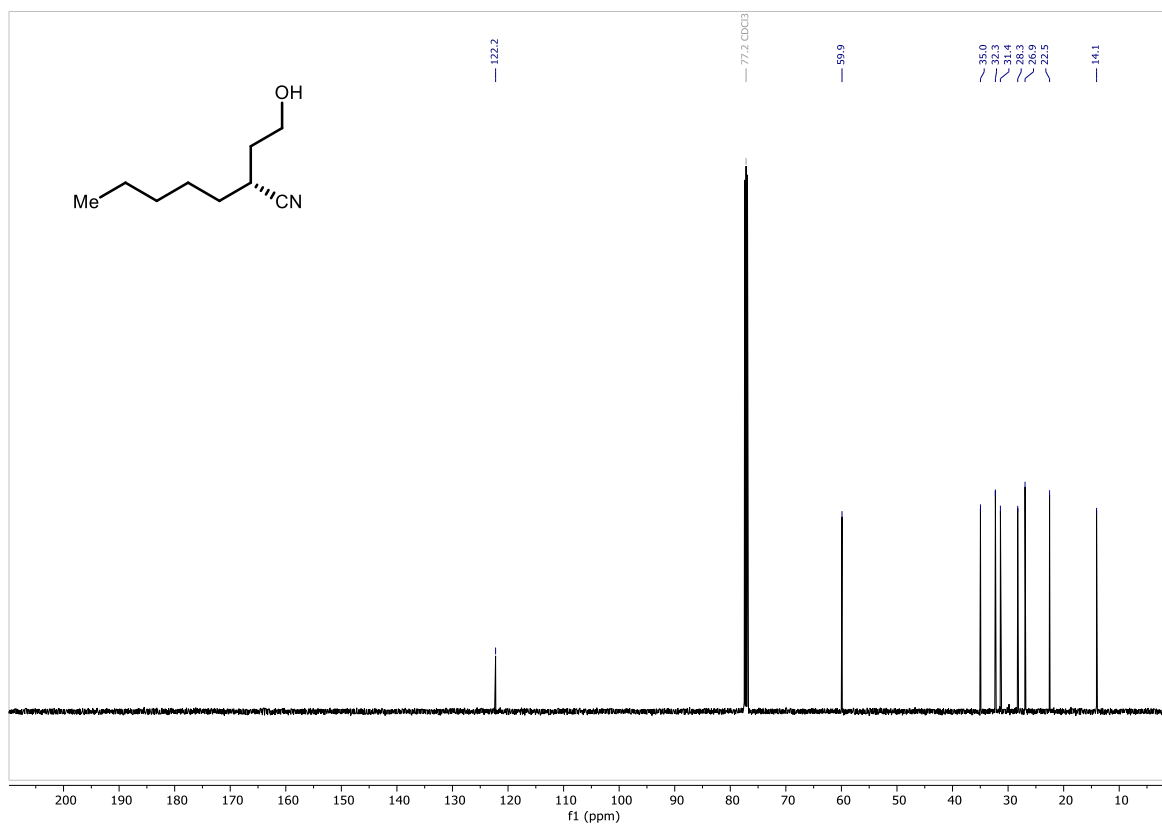

<sup>1</sup>H NMR (400 MHz, CDCl<sub>3</sub>) of **3b**:

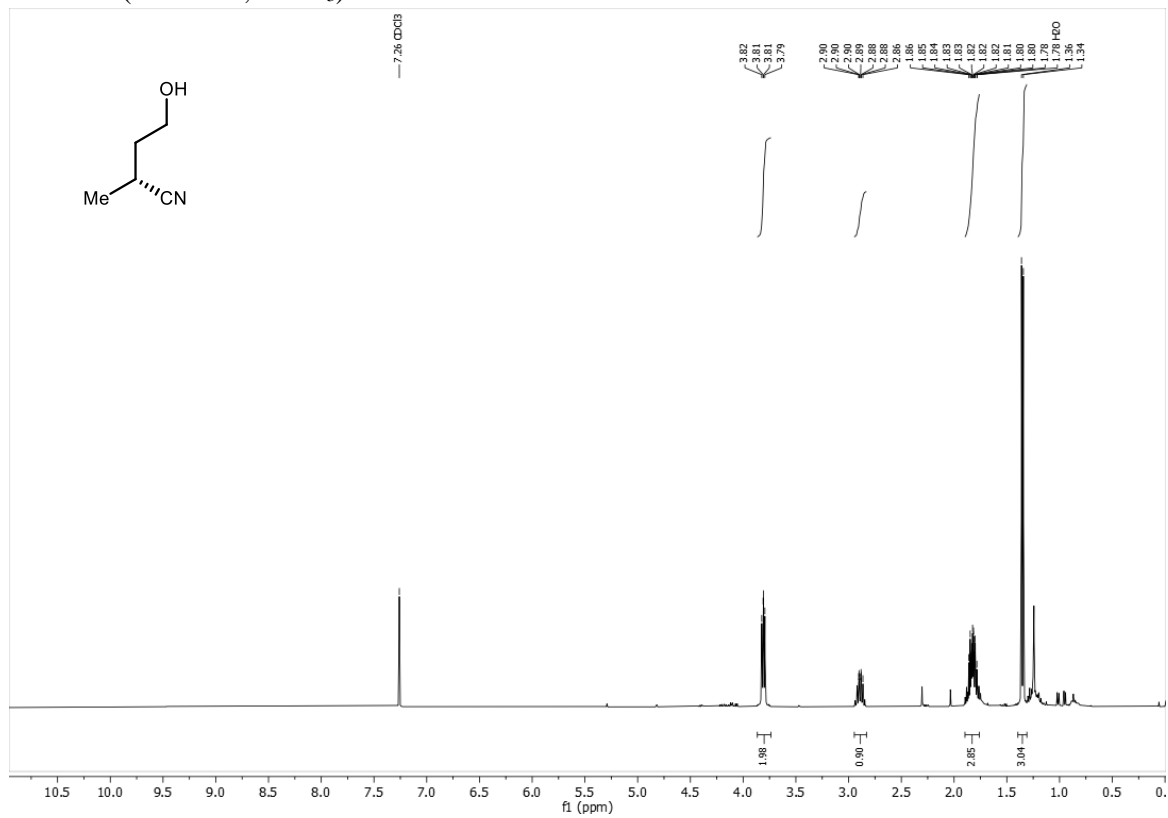

<sup>13</sup>C NMR (100 MHz, CDCl<sub>3</sub>) of **3b**:

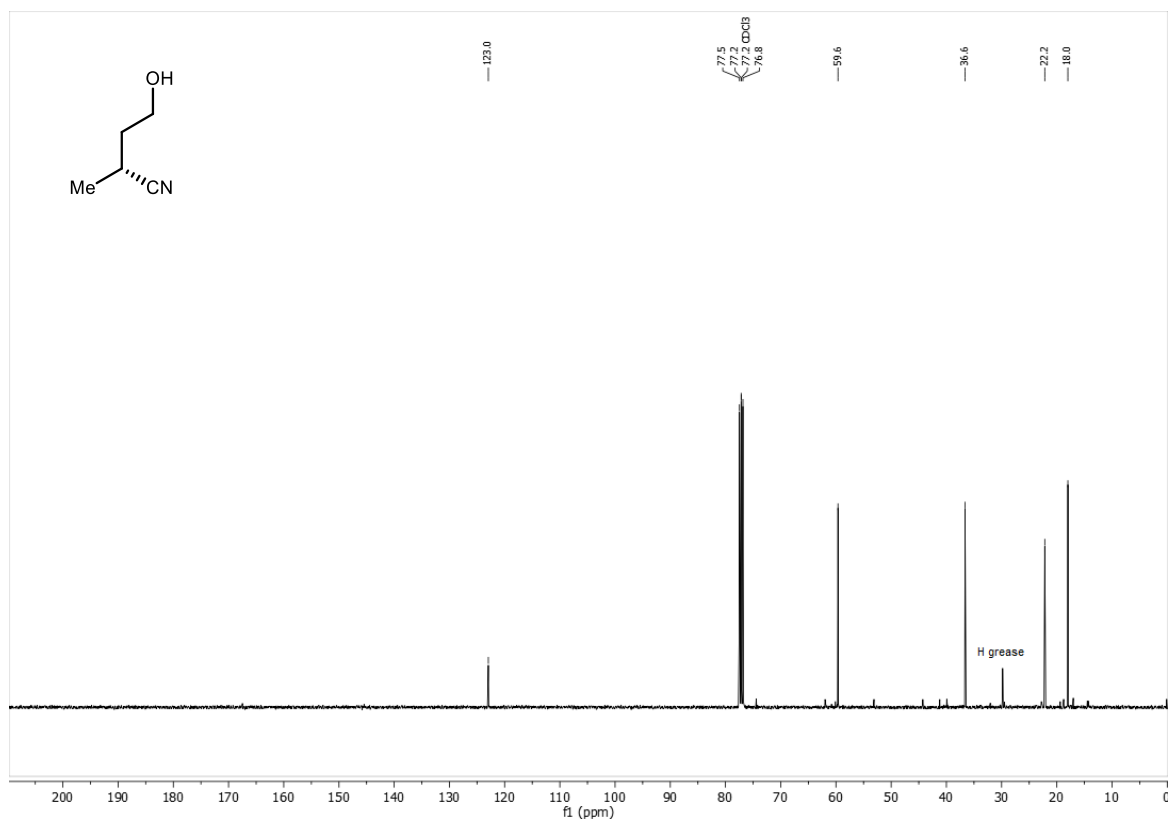

$^1\text{H}$  NMR (400 MHz,  $\text{CDCl}_3$ ) of **3c**:

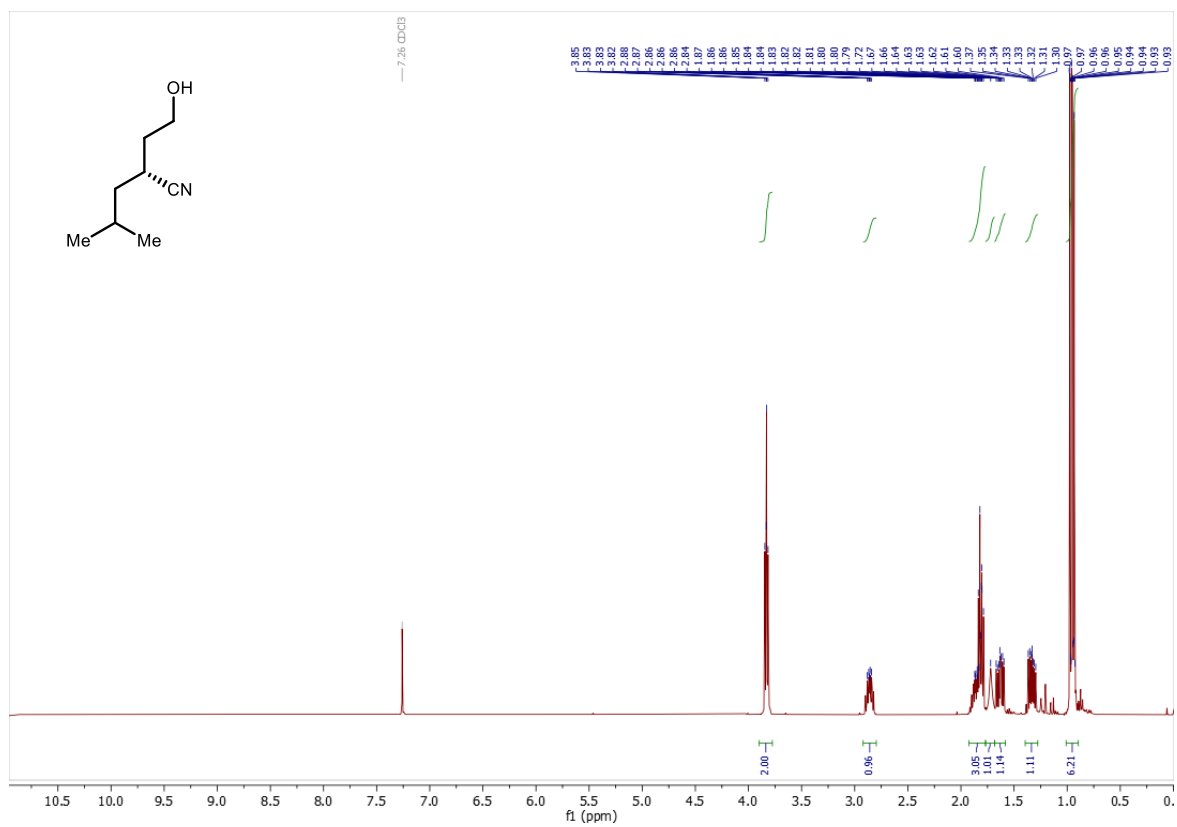

$^{13}\text{C}$  NMR (126 MHz,  $\text{CDCl}_3$ ) of **3c**:

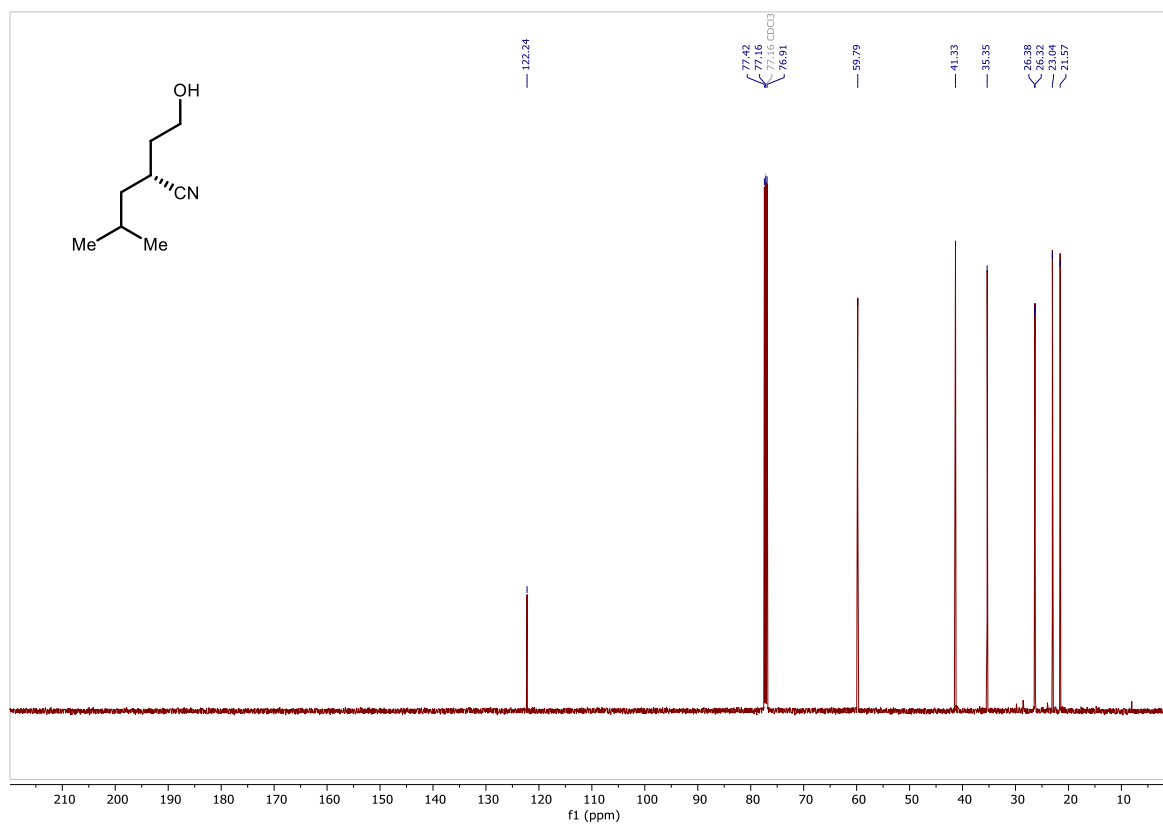

<sup>1</sup>H NMR (400 MHz, CDCl<sub>3</sub>) of **3d**:

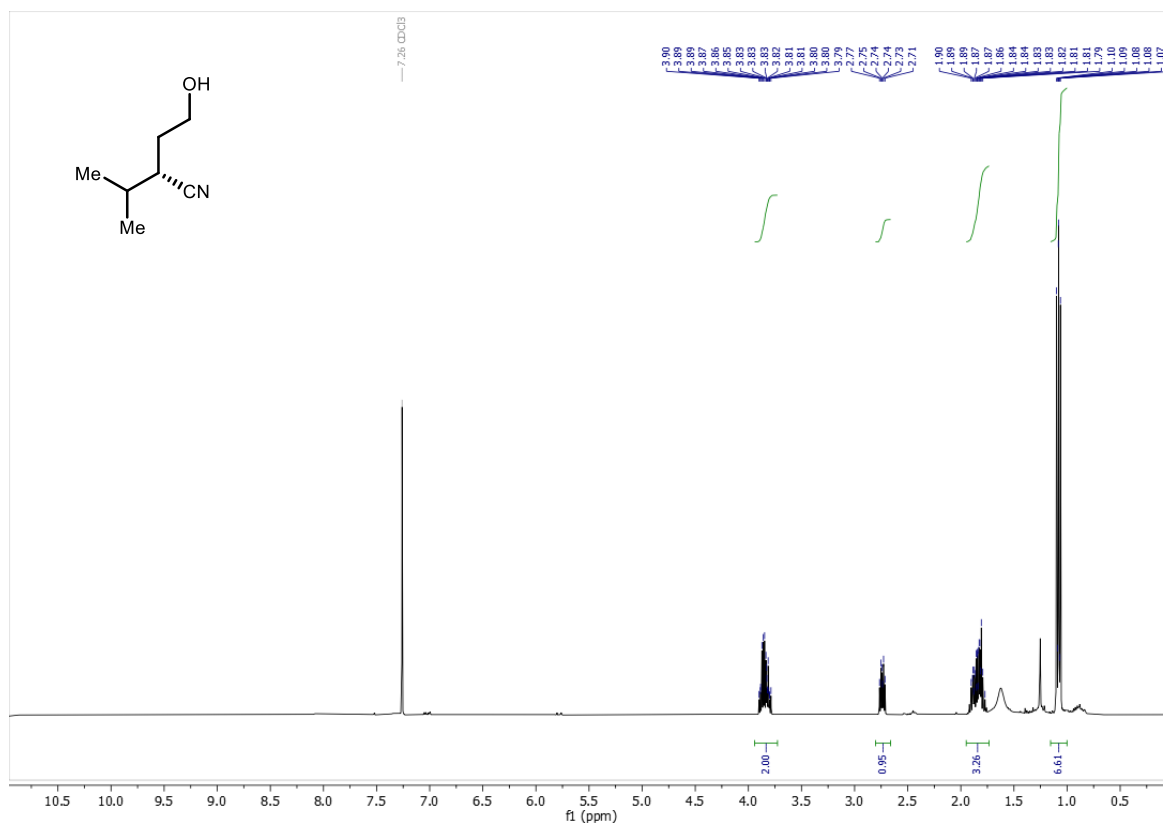

<sup>13</sup>C NMR (126 MHz, CDCl<sub>3</sub>) of **3d**:

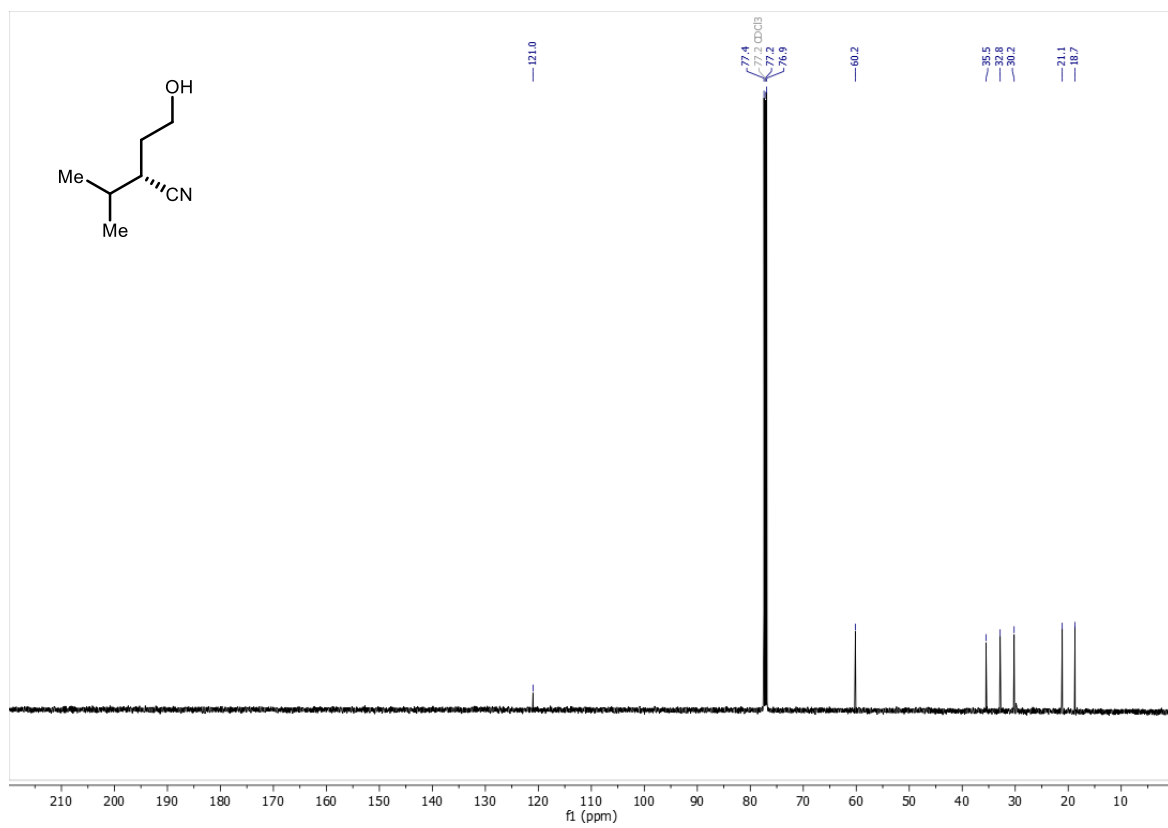

<sup>1</sup>H NMR (400 MHz, CDCl<sub>3</sub>) of **3e**:

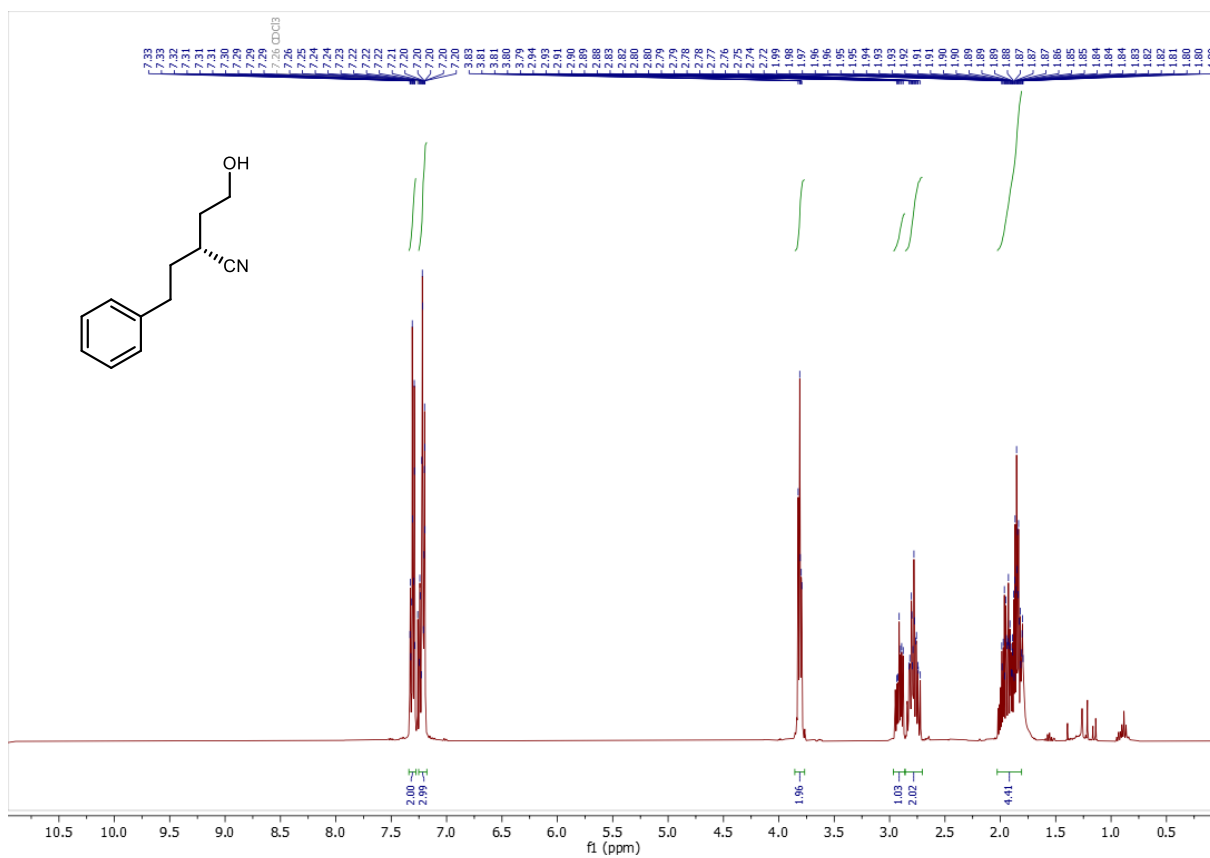

<sup>13</sup>C NMR (126 MHz, CDCl<sub>3</sub>) of **3e**:

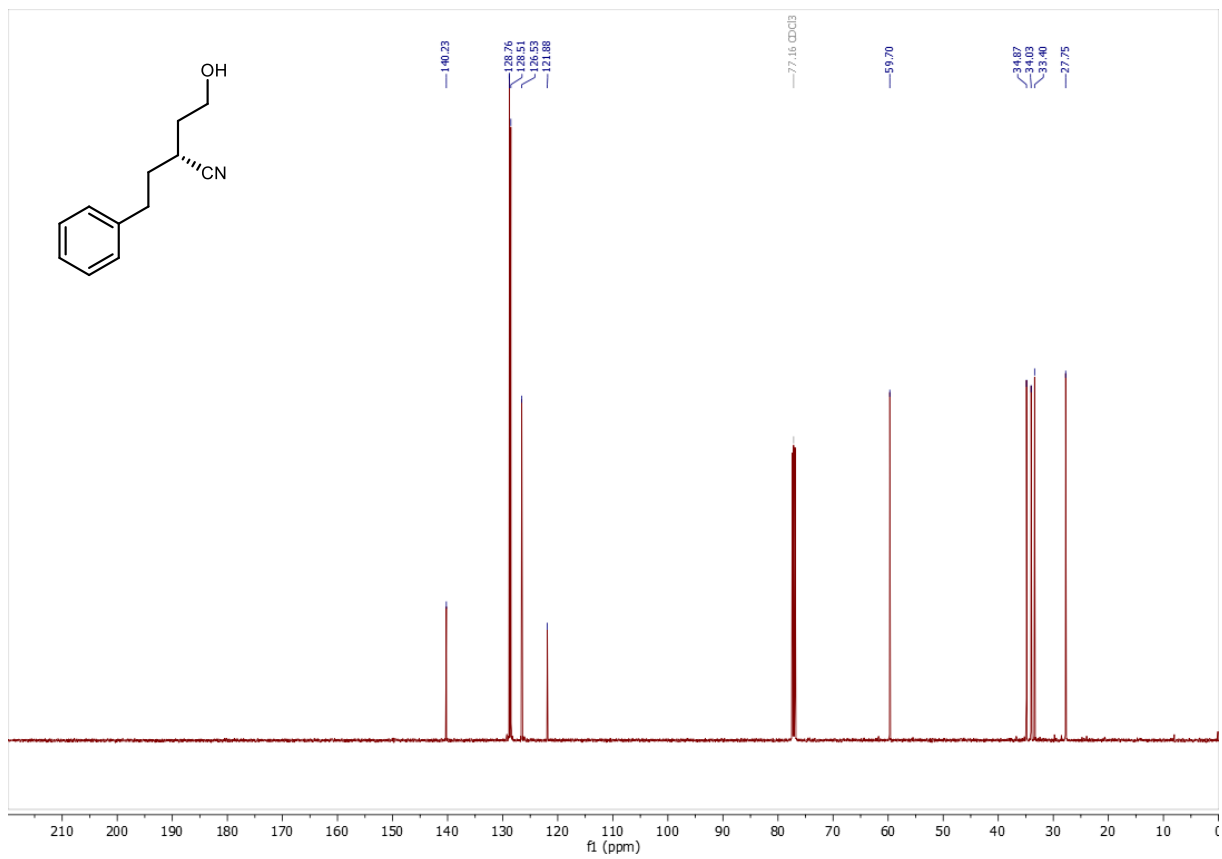



$^1\text{H}$  NMR (500 MHz,  $\text{CDCl}_3$ ) of **3f**:

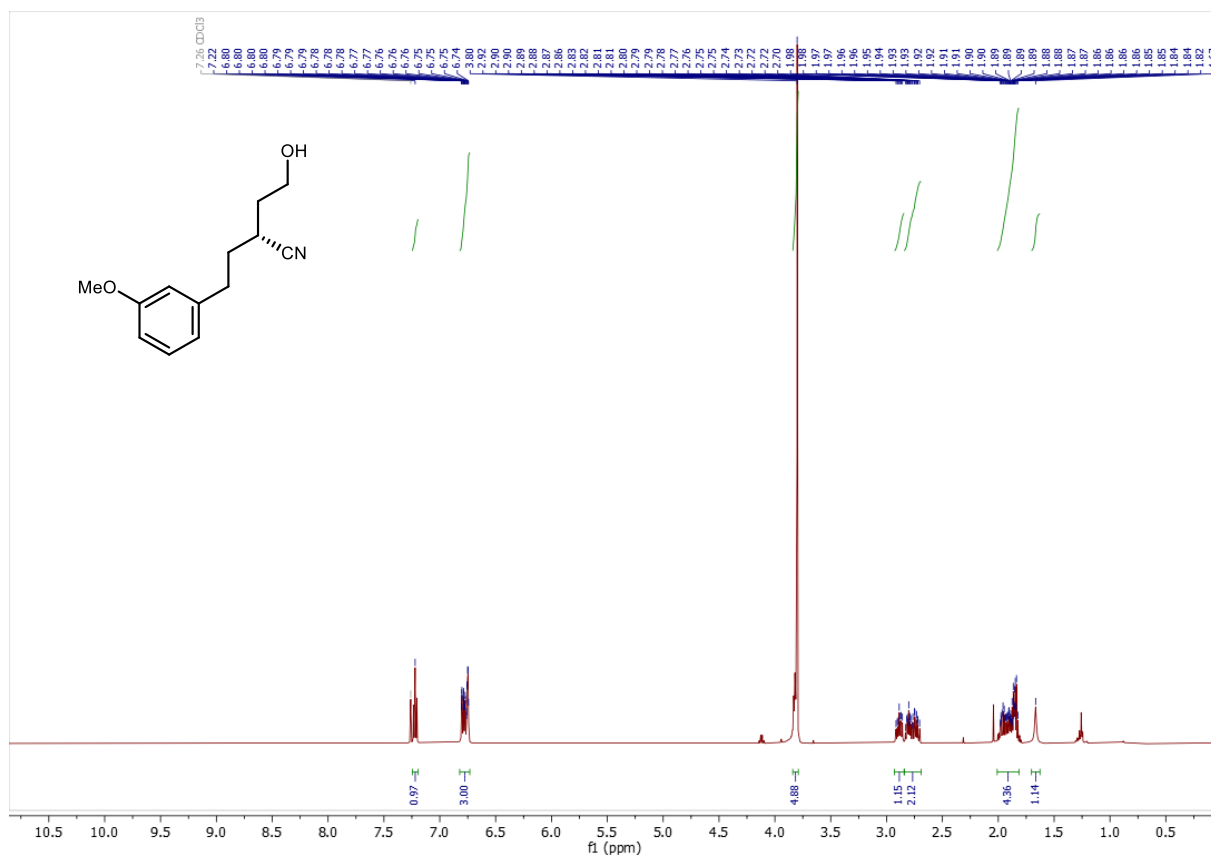

$^{13}\text{C}$  NMR (126 MHz,  $\text{CDCl}_3$ ) of **3f**:

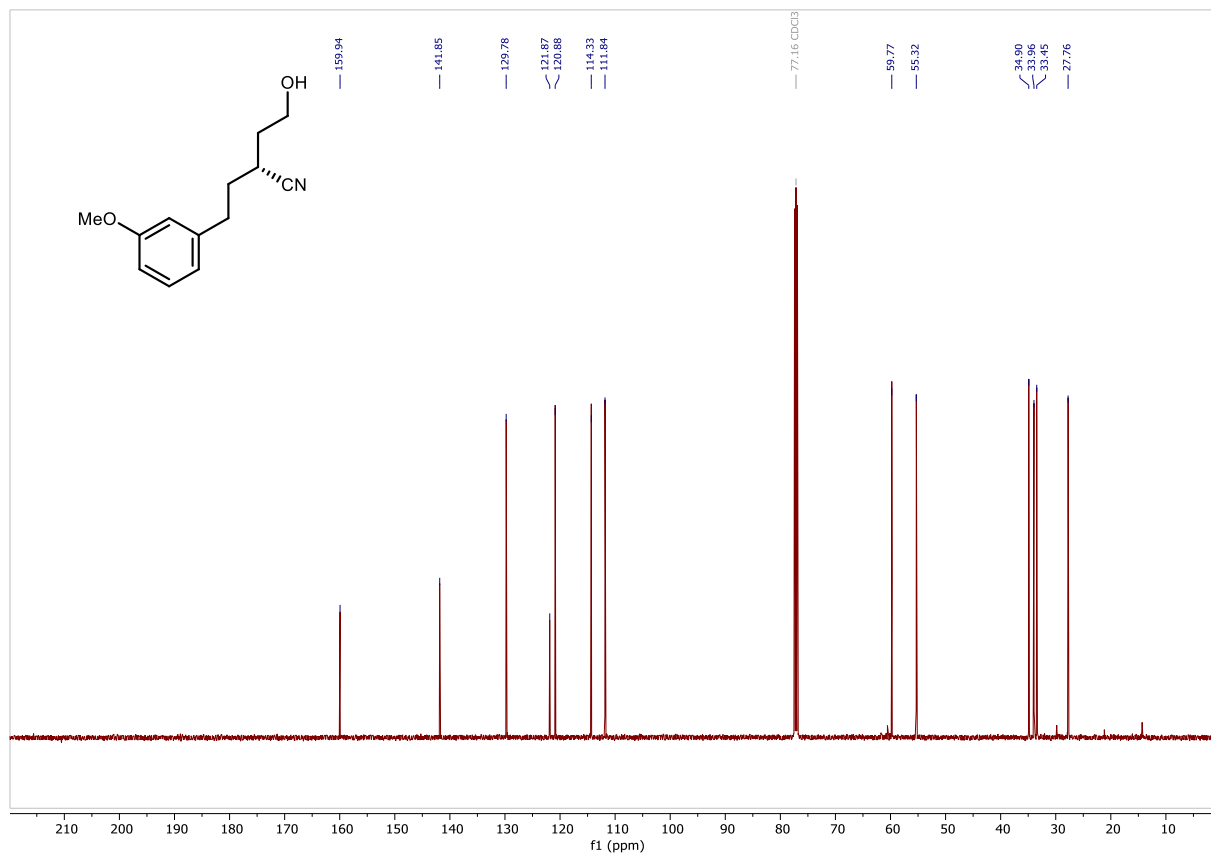

$^1\text{H}$  NMR (400 MHz,  $\text{CDCl}_3$ ) of **3g**:

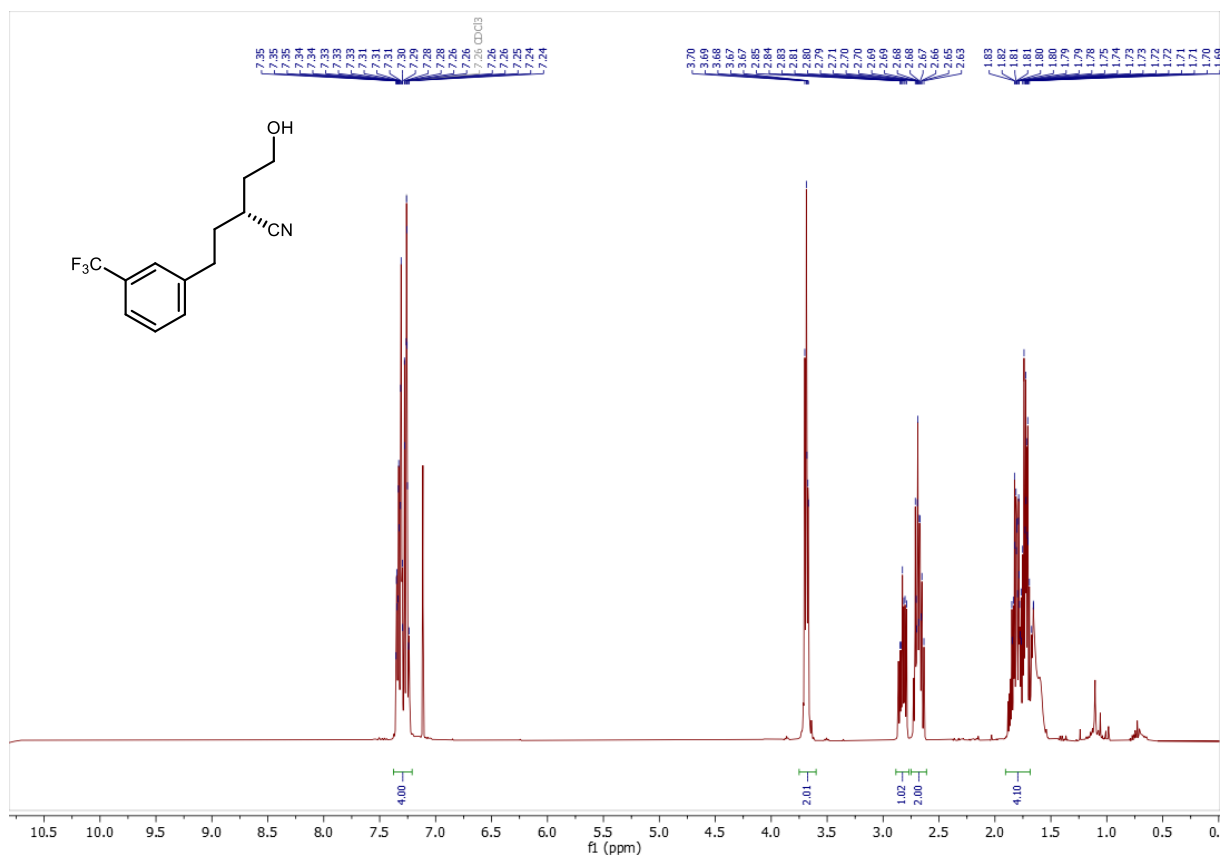

$^{13}\text{C}$  NMR (101 MHz,  $\text{CDCl}_3$ ) of **3g**:

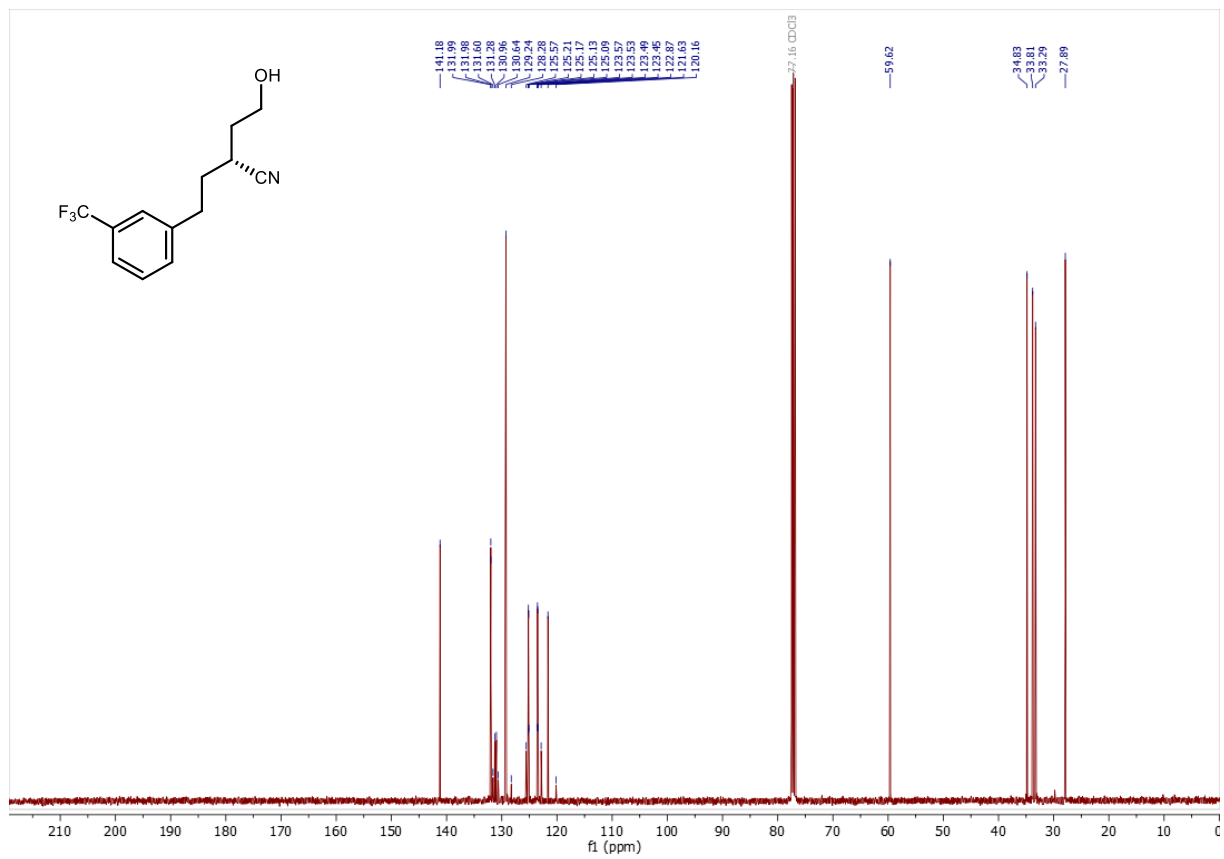

$^{19}\text{F}$  NMR (376 MHz,  $\text{CDCl}_3$ ) of **3g**:

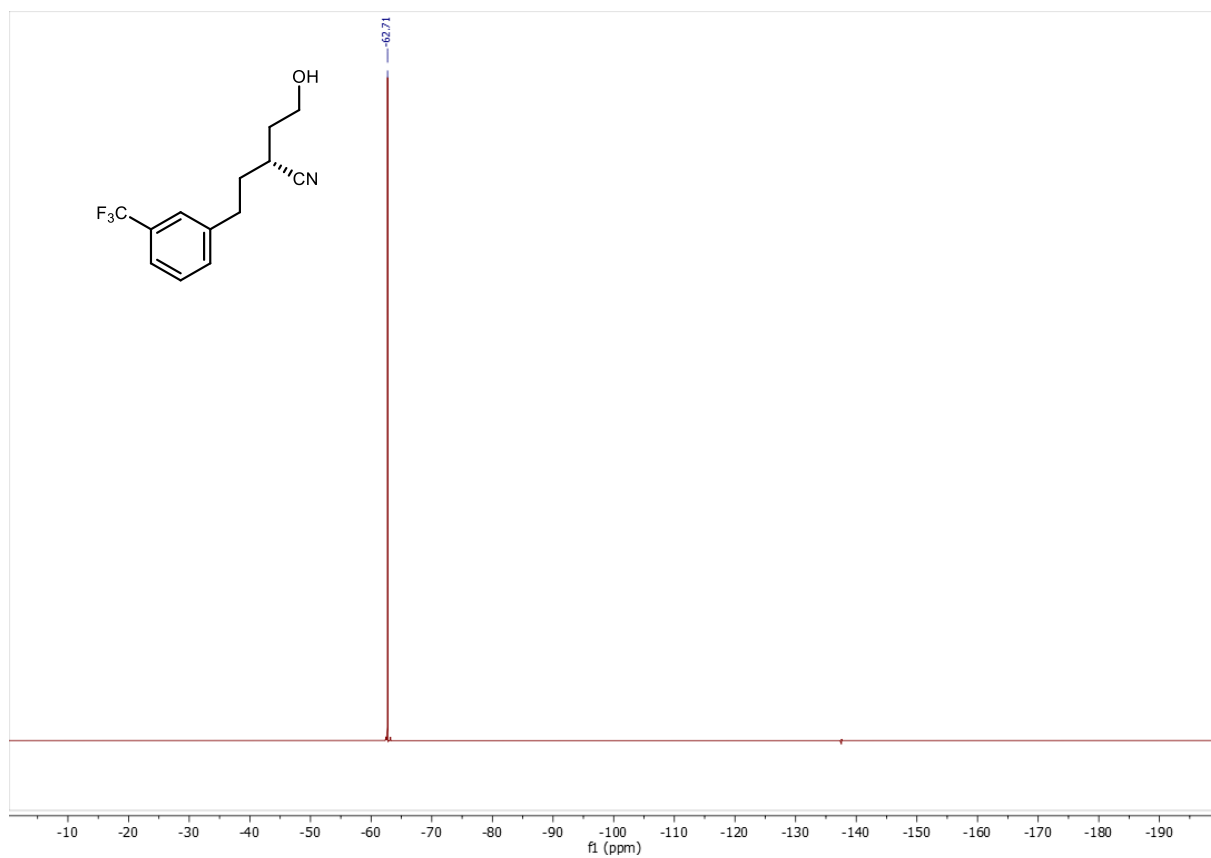

<sup>1</sup>H NMR (400 MHz, CDCl<sub>3</sub>) of **3h**:

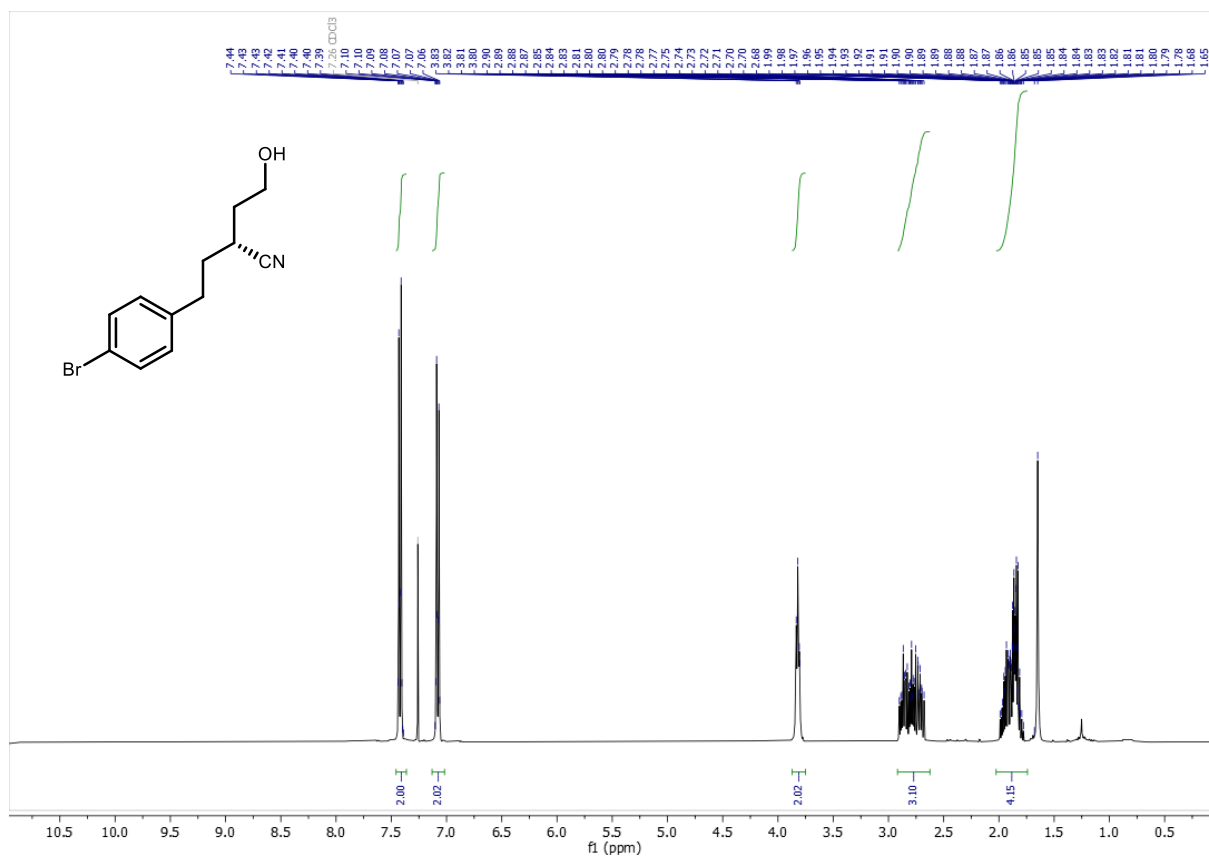

<sup>13</sup>C NMR (101 MHz, CDCl<sub>3</sub>) of **3h**:

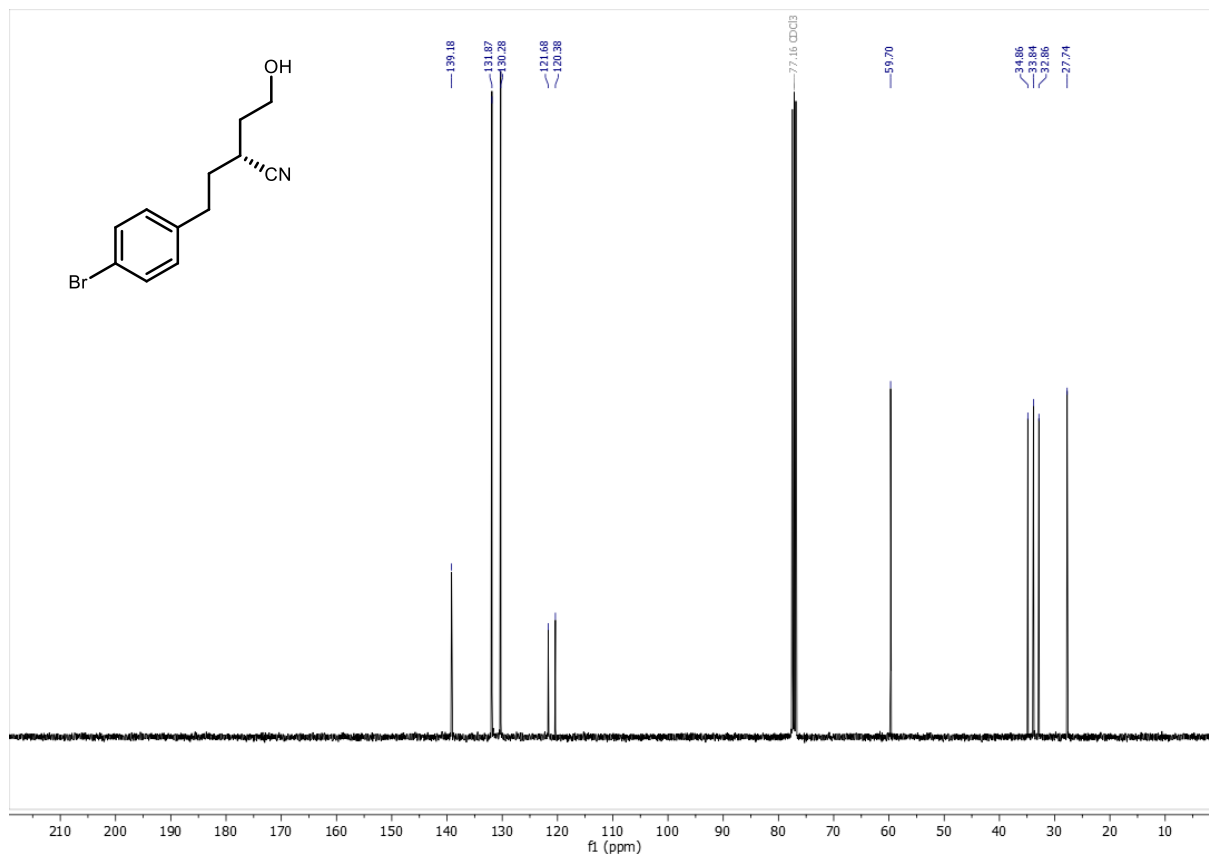

<sup>1</sup>H NMR (500 MHz, CDCl<sub>3</sub>) of **3i**:

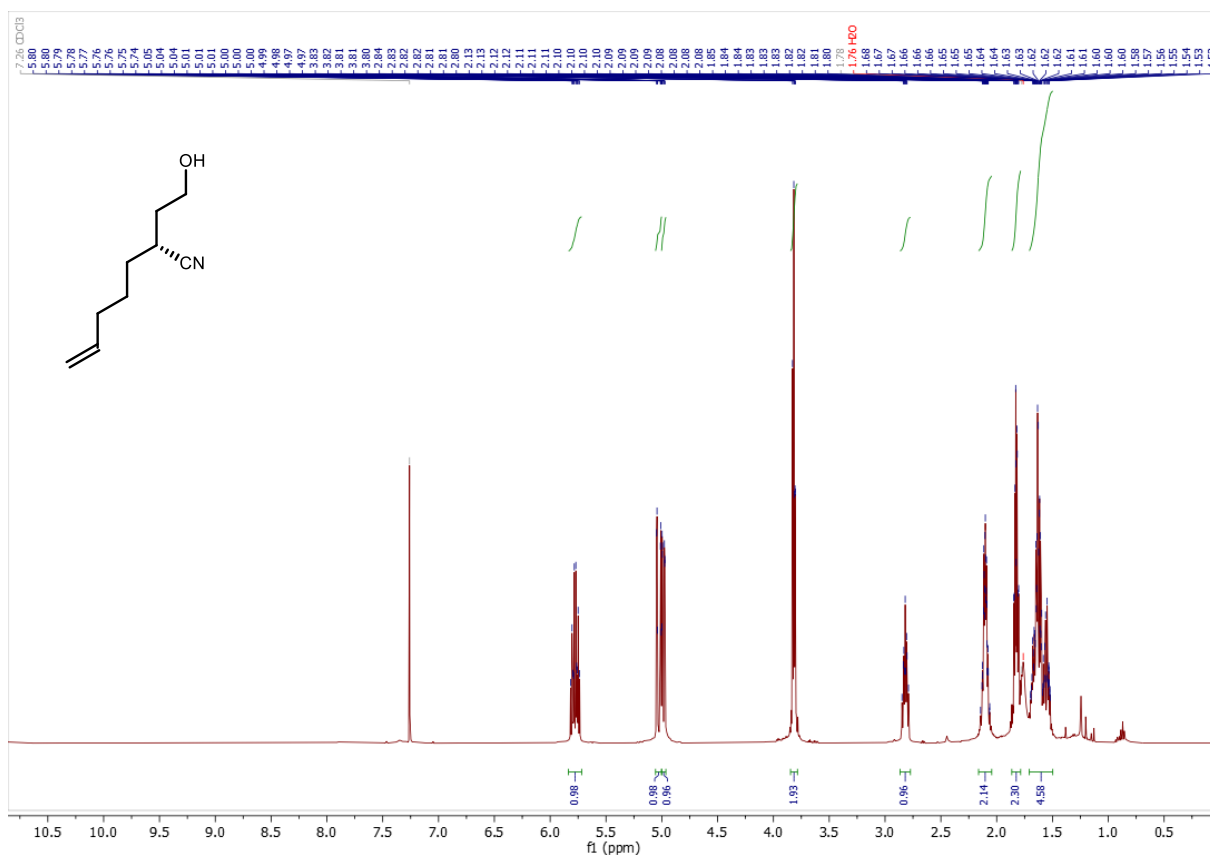

<sup>13</sup>C NMR (126 MHz, CDCl<sub>3</sub>) of **3i**:

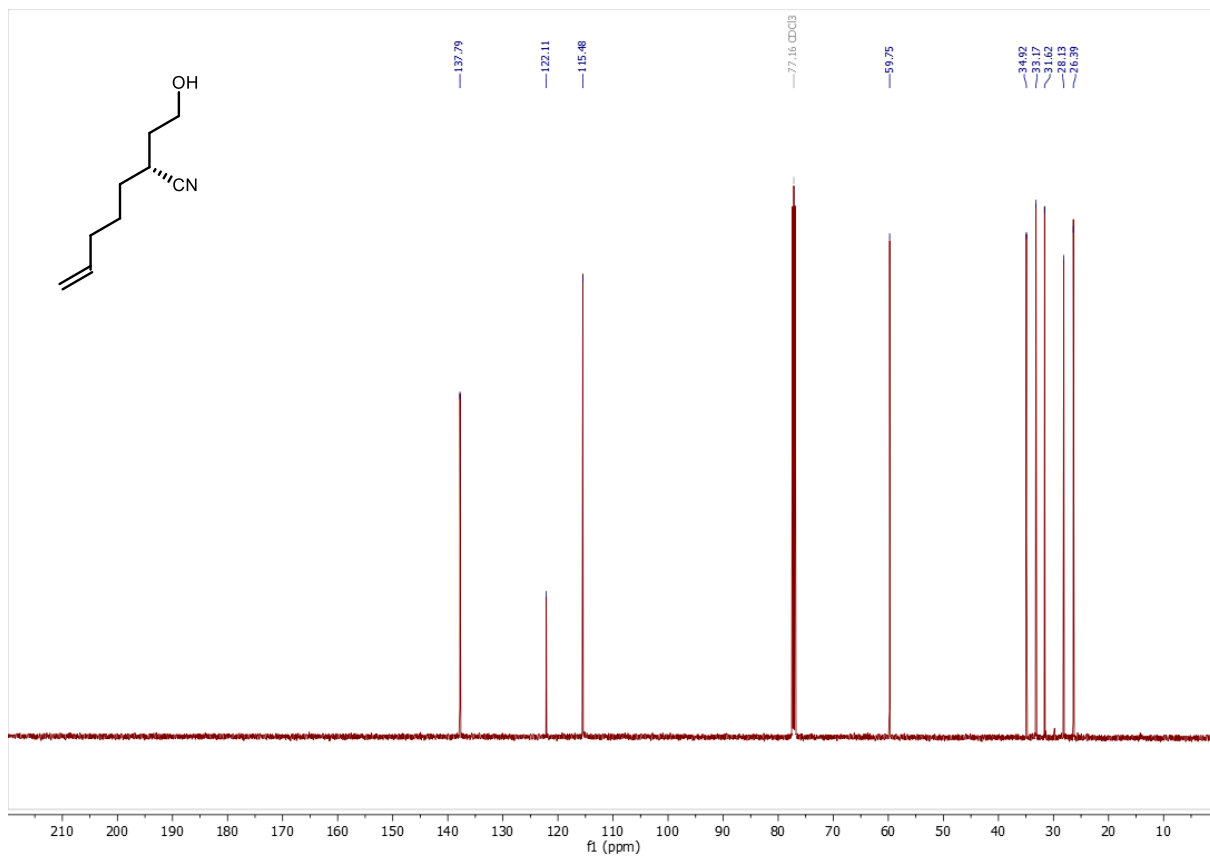

$^1\text{H}$  NMR (400 MHz,  $\text{CDCl}_3$ , 90.5:9.5 d.r.) of **3j**:

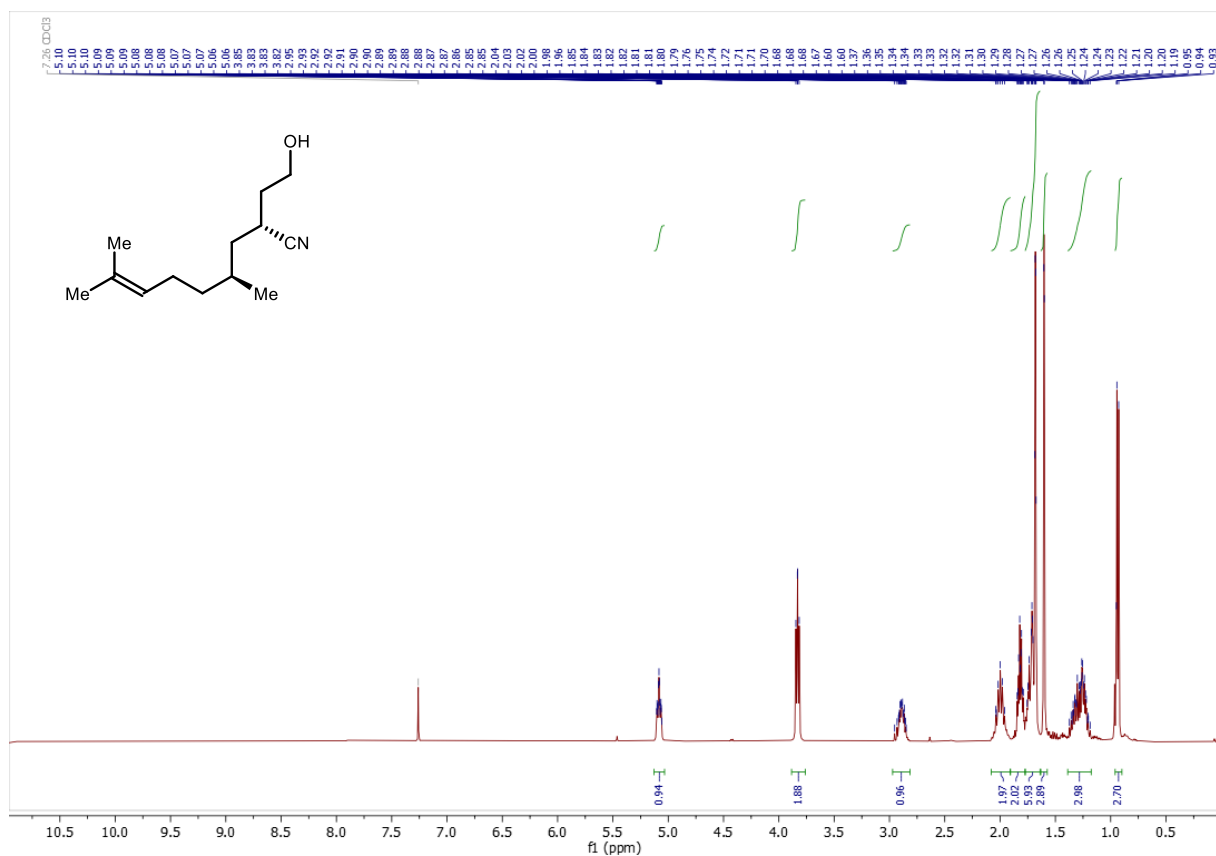

$^{13}\text{C}$  NMR (101 MHz,  $\text{CDCl}_3$ , 90.5:9.5 d.r.) of **3j**:

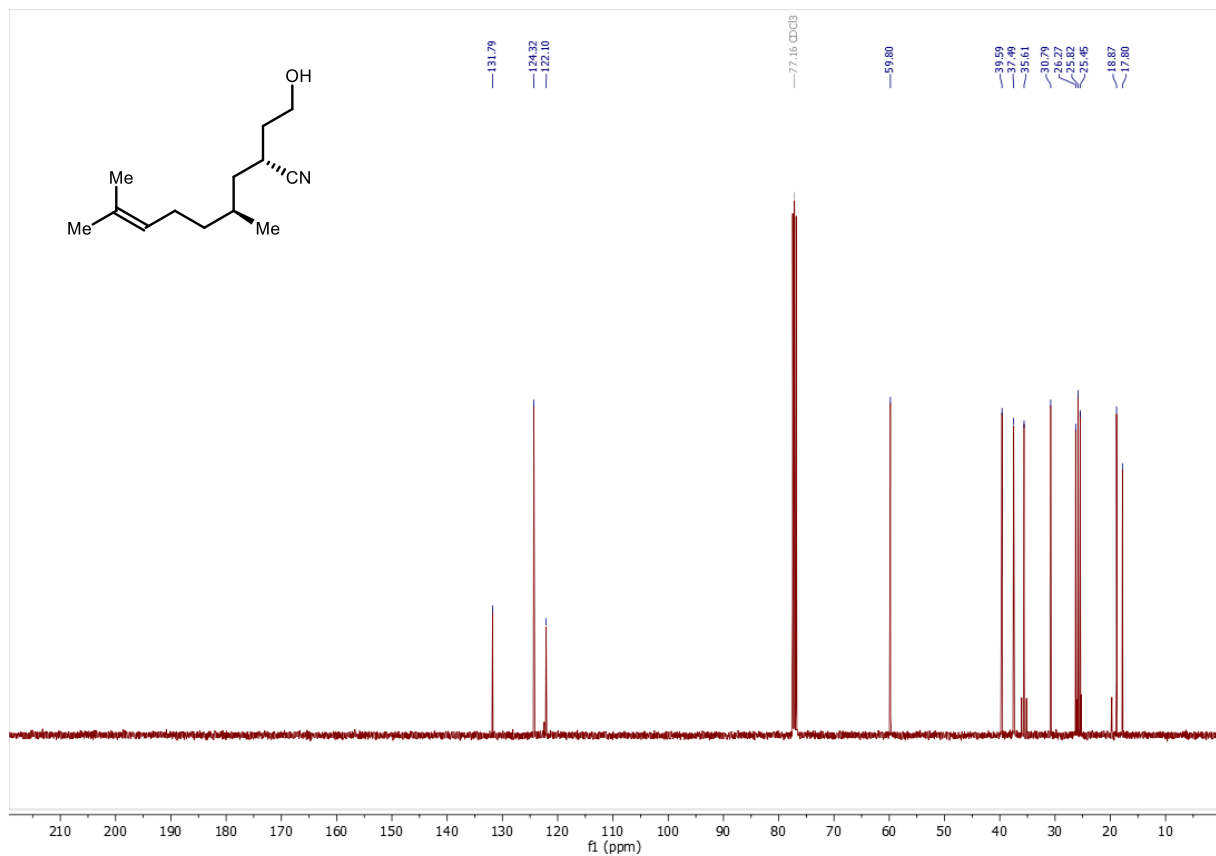

$^1\text{H}$  NMR (500 MHz,  $\text{CDCl}_3$ ,  $E/Z = 60:40$ ) of **3k**:

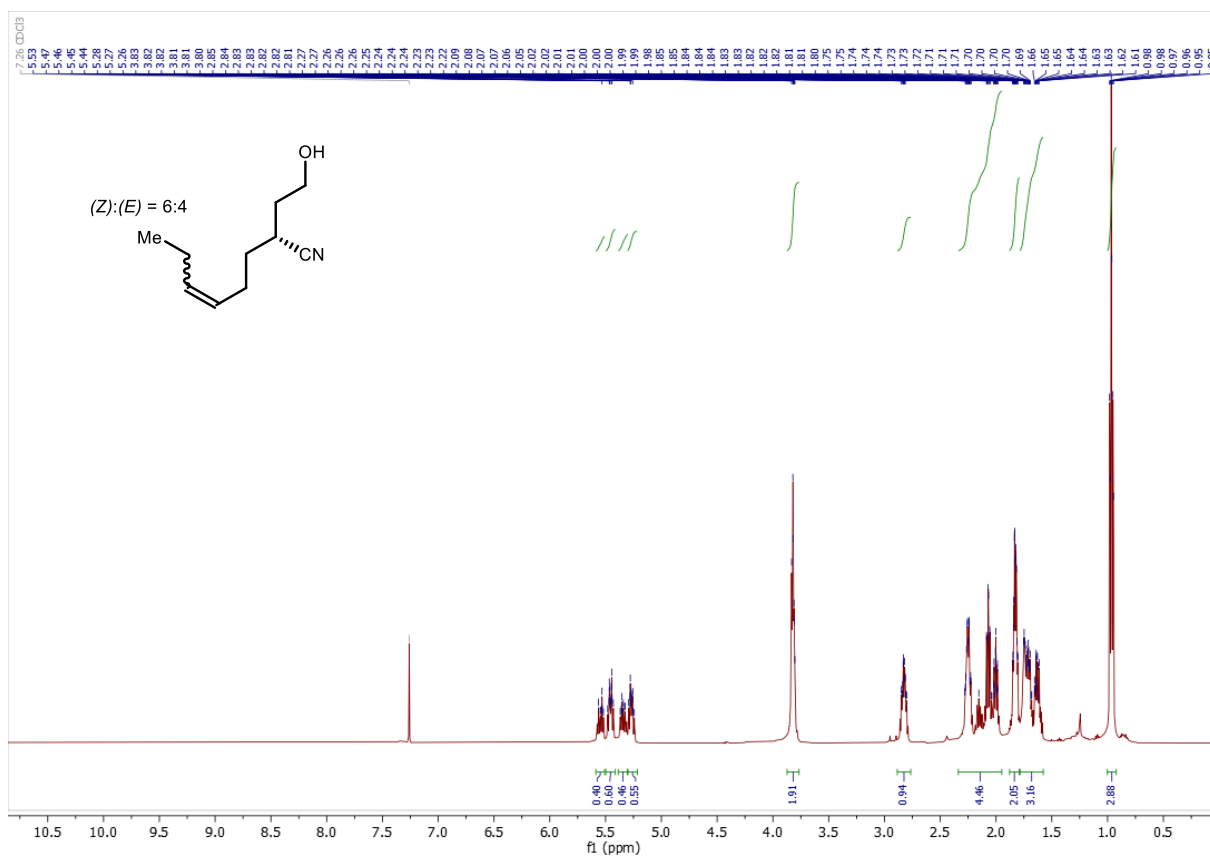

$^{13}\text{C}$  NMR (126 MHz,  $\text{CDCl}_3$ ,  $E/Z = 60:40$ ) of **3k**:

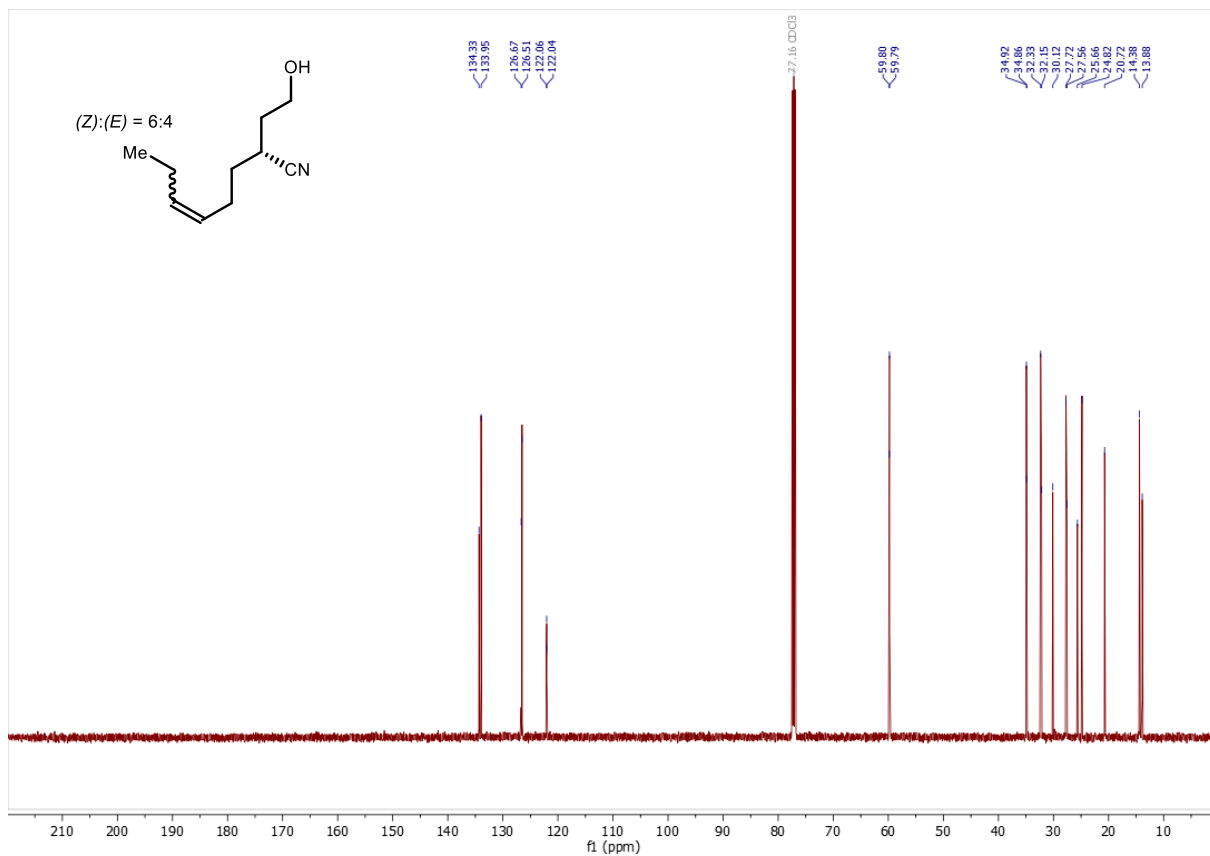

<sup>1</sup>H NMR (400 MHz, CDCl<sub>3</sub>) of **31**:

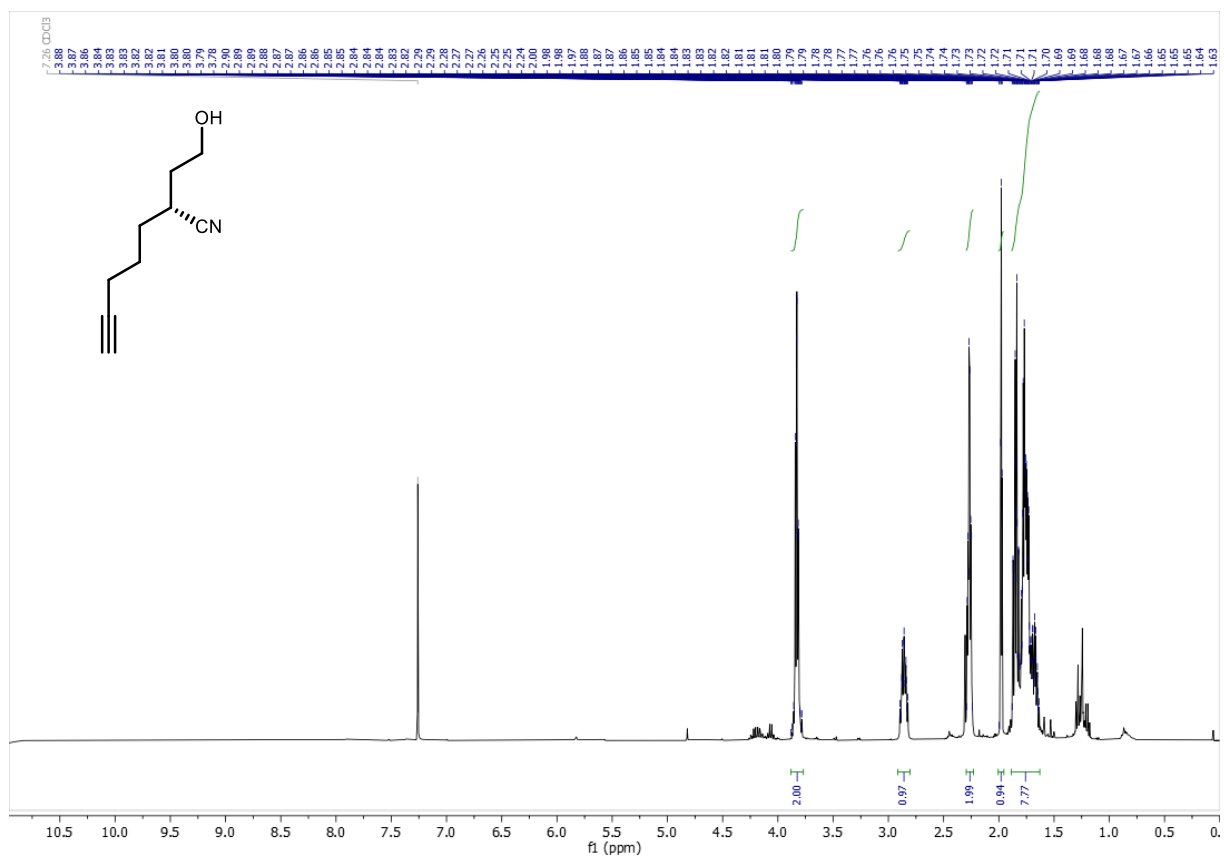

<sup>13</sup>C NMR (101 MHz, CDCl<sub>3</sub>) of **31**:

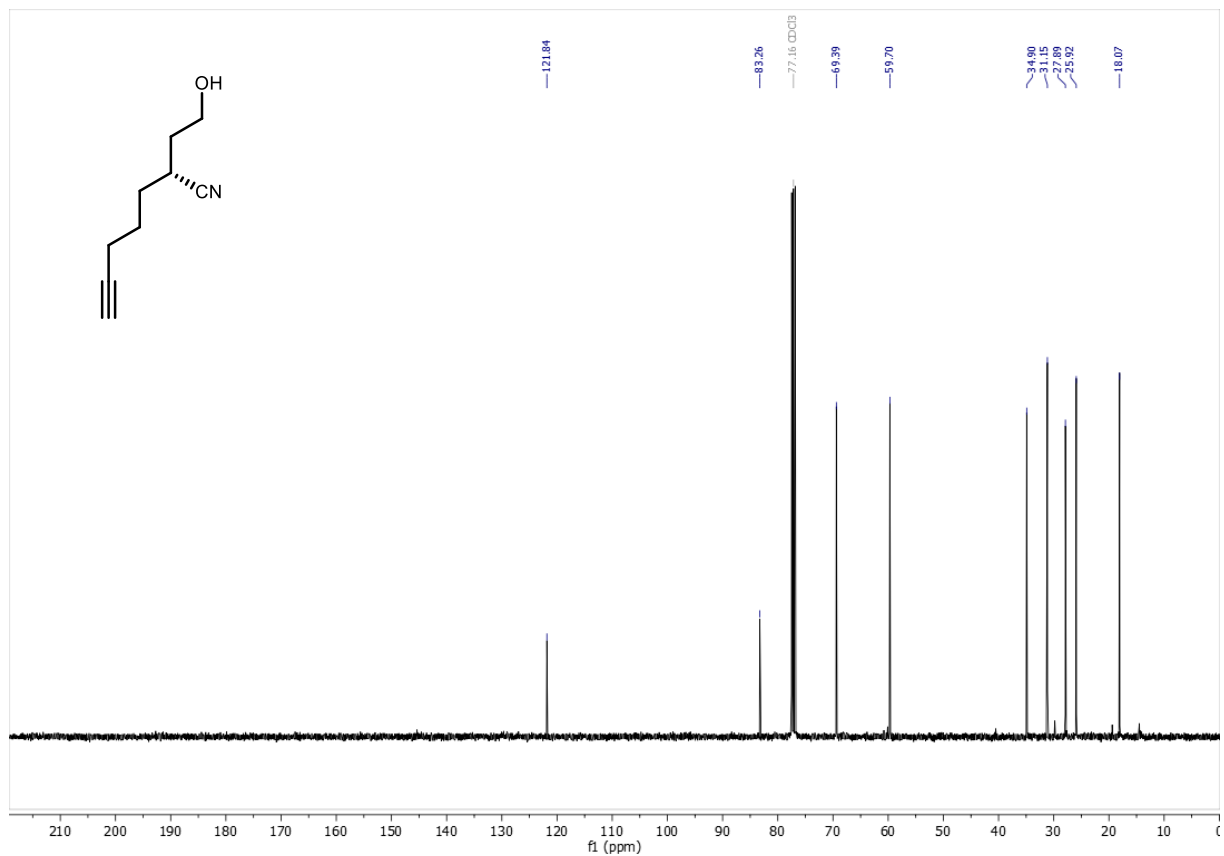



$^1\text{H}$  NMR (400 MHz,  $\text{CDCl}_3$ ) of **2m**:

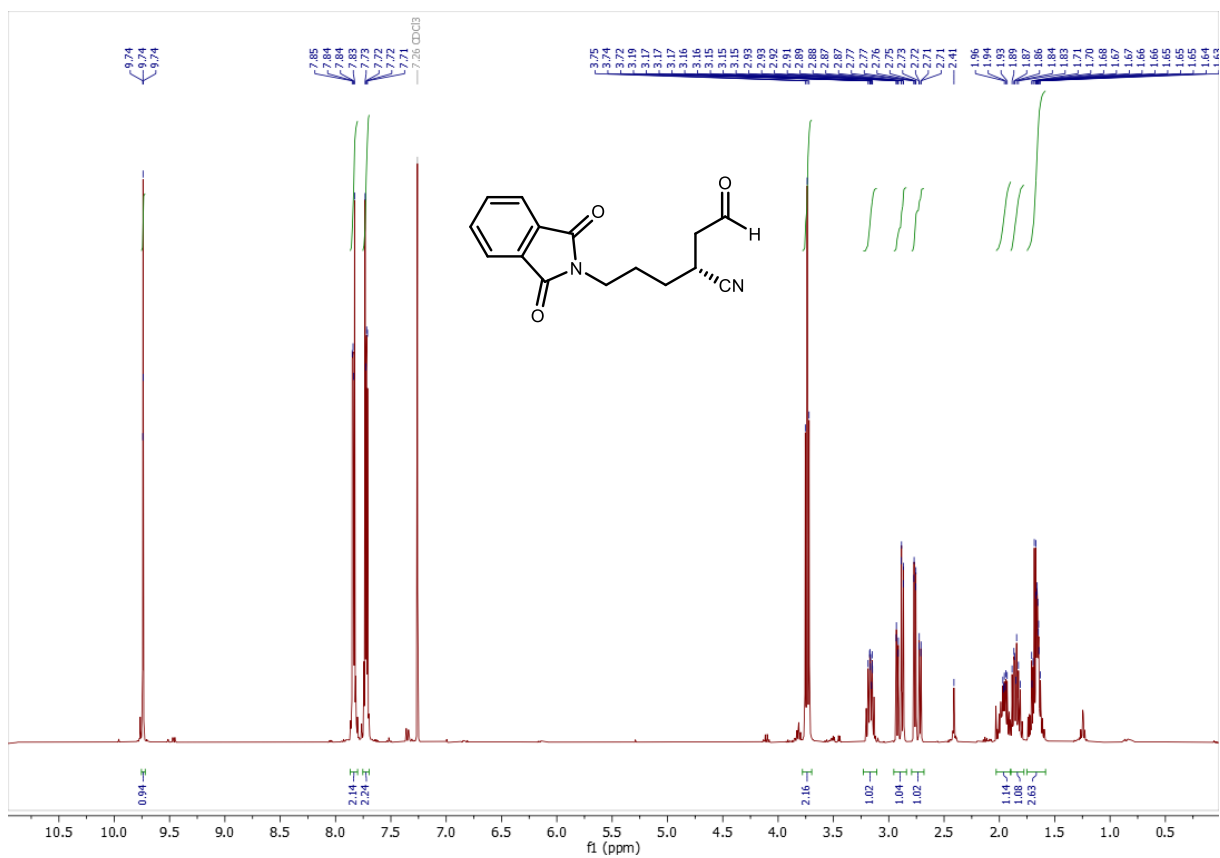

$^{13}\text{C}$  NMR (101 MHz,  $\text{CDCl}_3$ ) of **2m**:

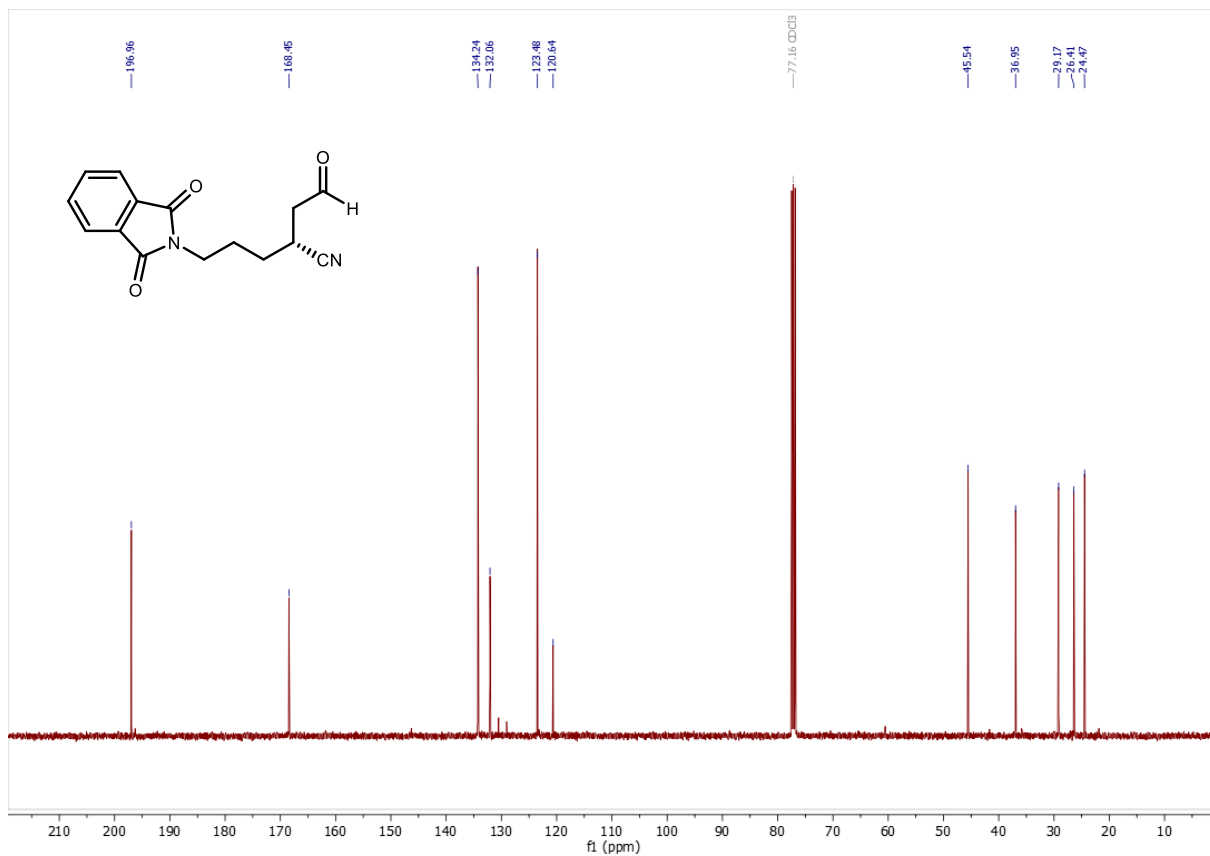

<sup>1</sup>H NMR (500 MHz, CDCl<sub>3</sub>) of **3n**:

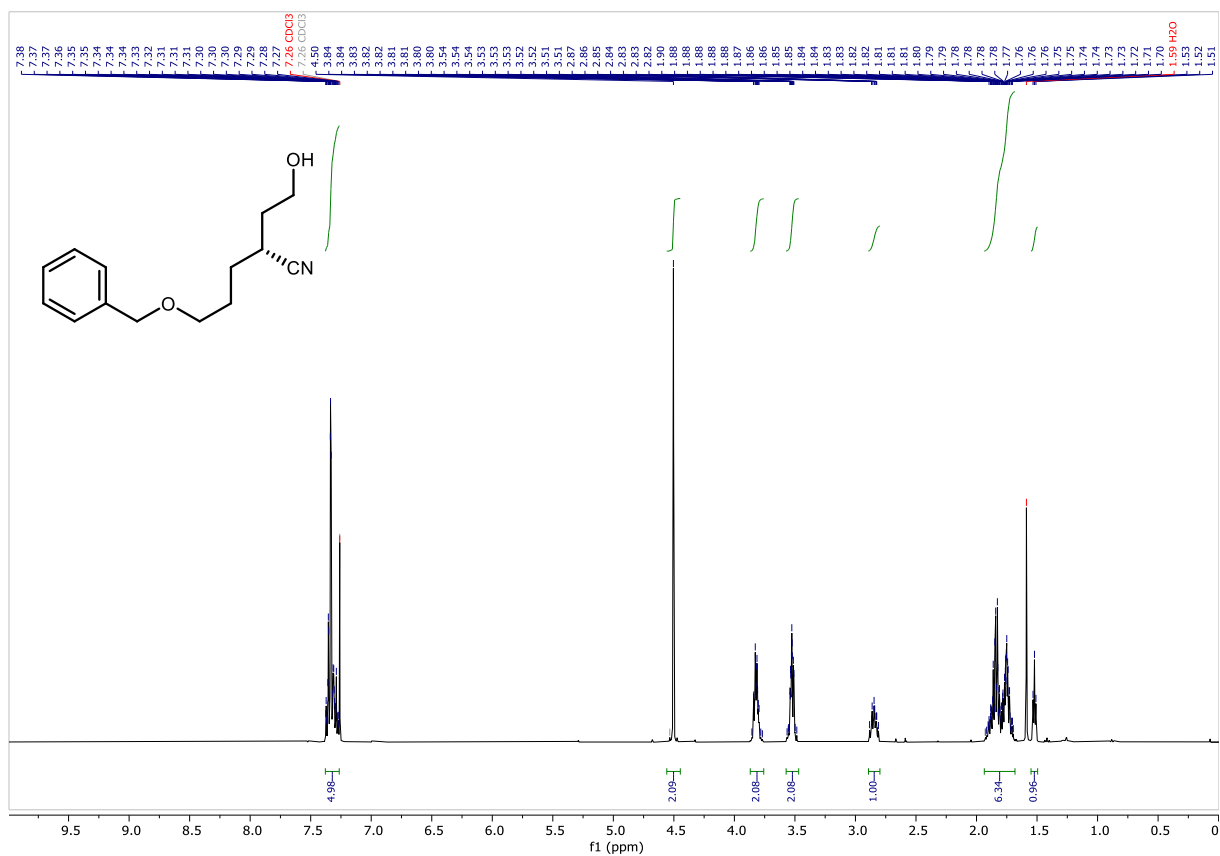

<sup>13</sup>C NMR (126 MHz, CDCl<sub>3</sub>) of **3n**:

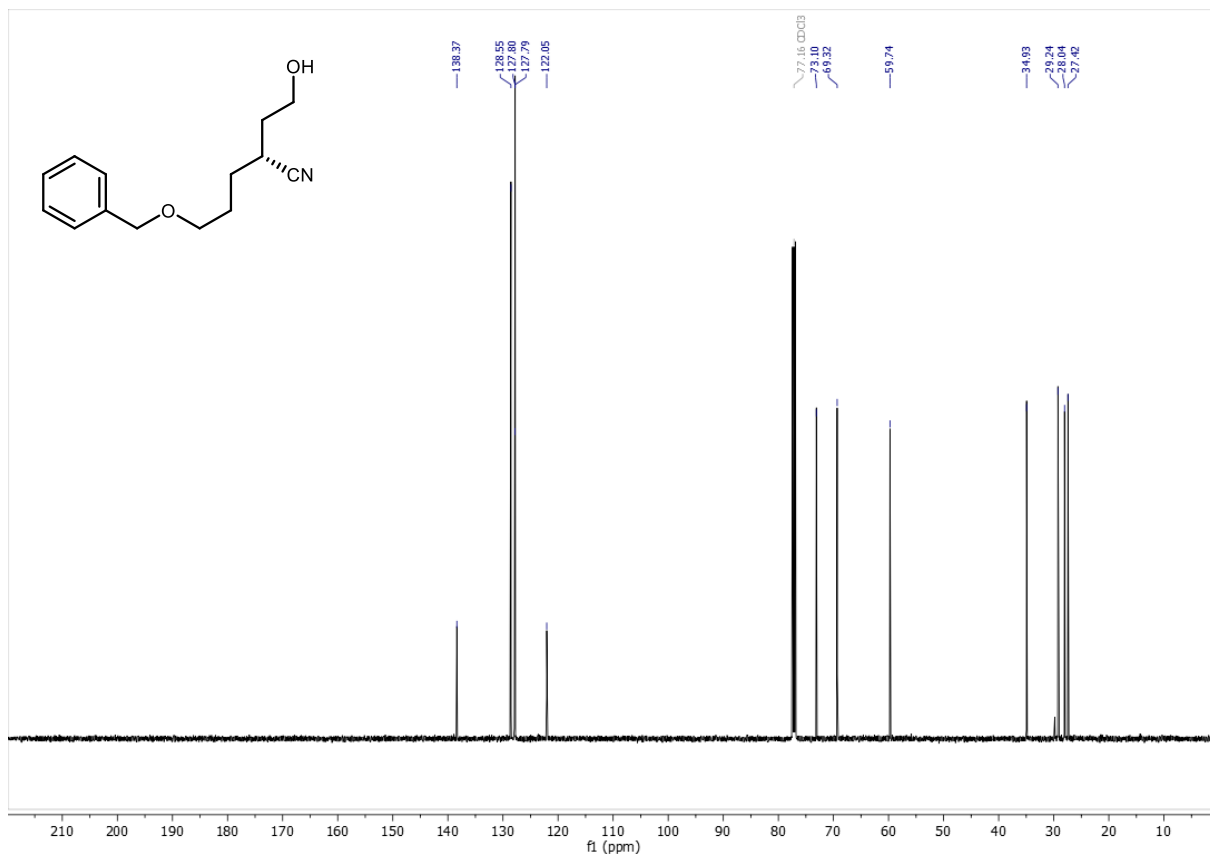

$^1\text{H}$  NMR (400 MHz,  $\text{CDCl}_3$ ) of **3o**:

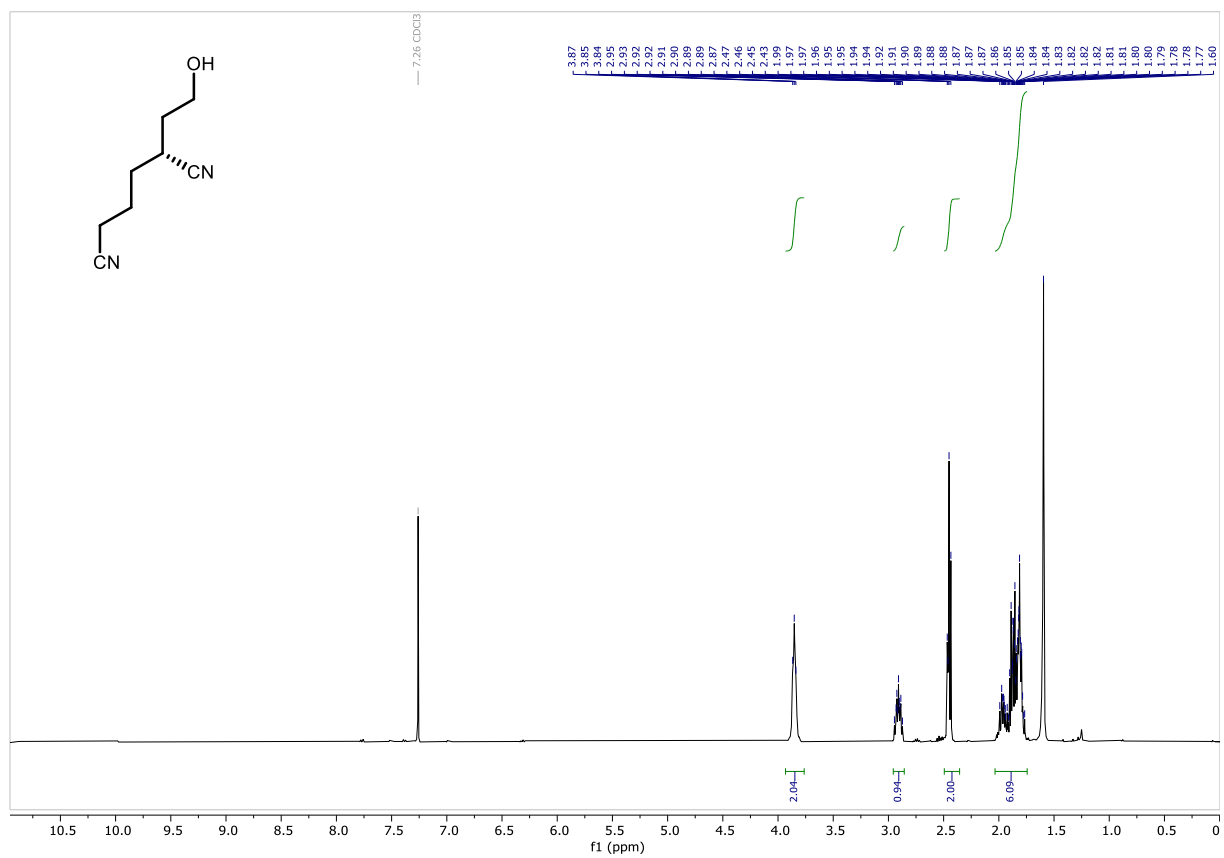

$^{13}\text{C}$  NMR (101 MHz,  $\text{CDCl}_3$ ) of **3o**:

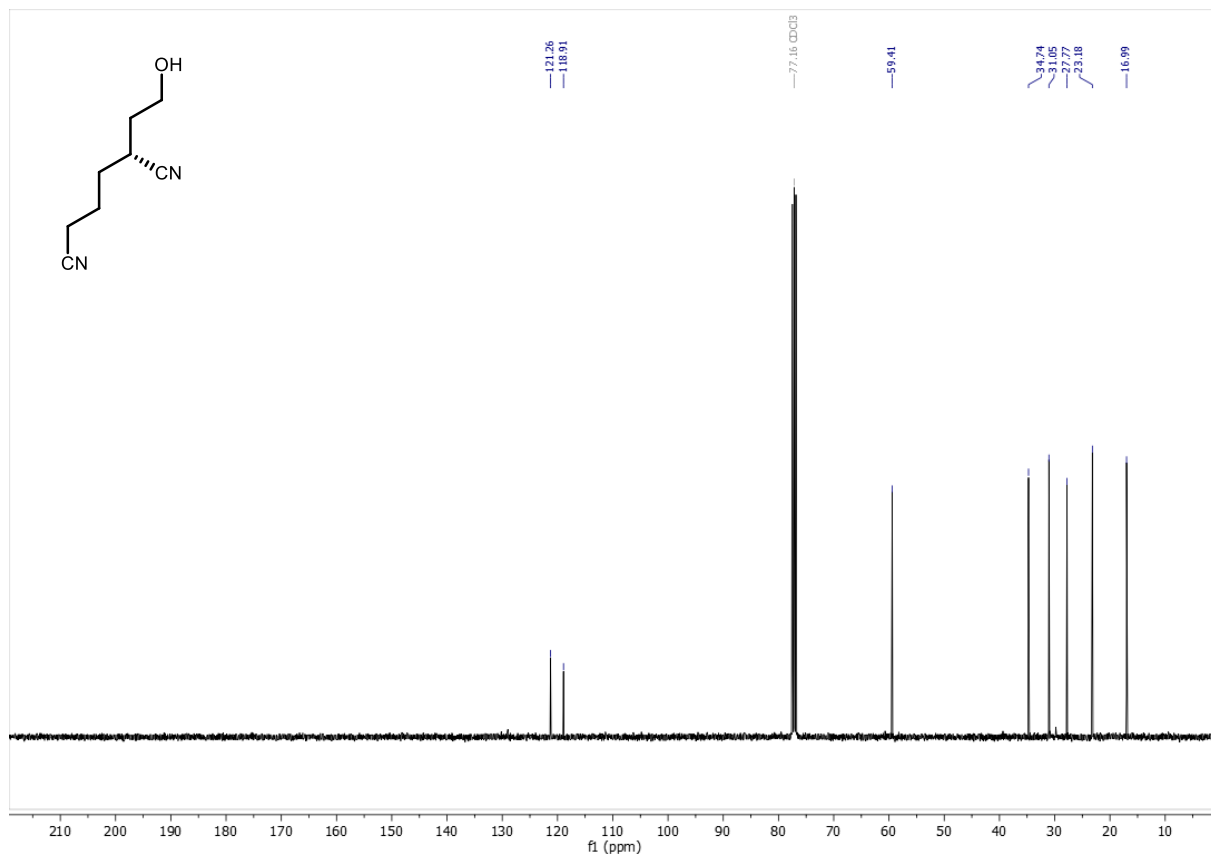

<sup>1</sup>H NMR (400 MHz, CDCl<sub>3</sub>) of **2p**:

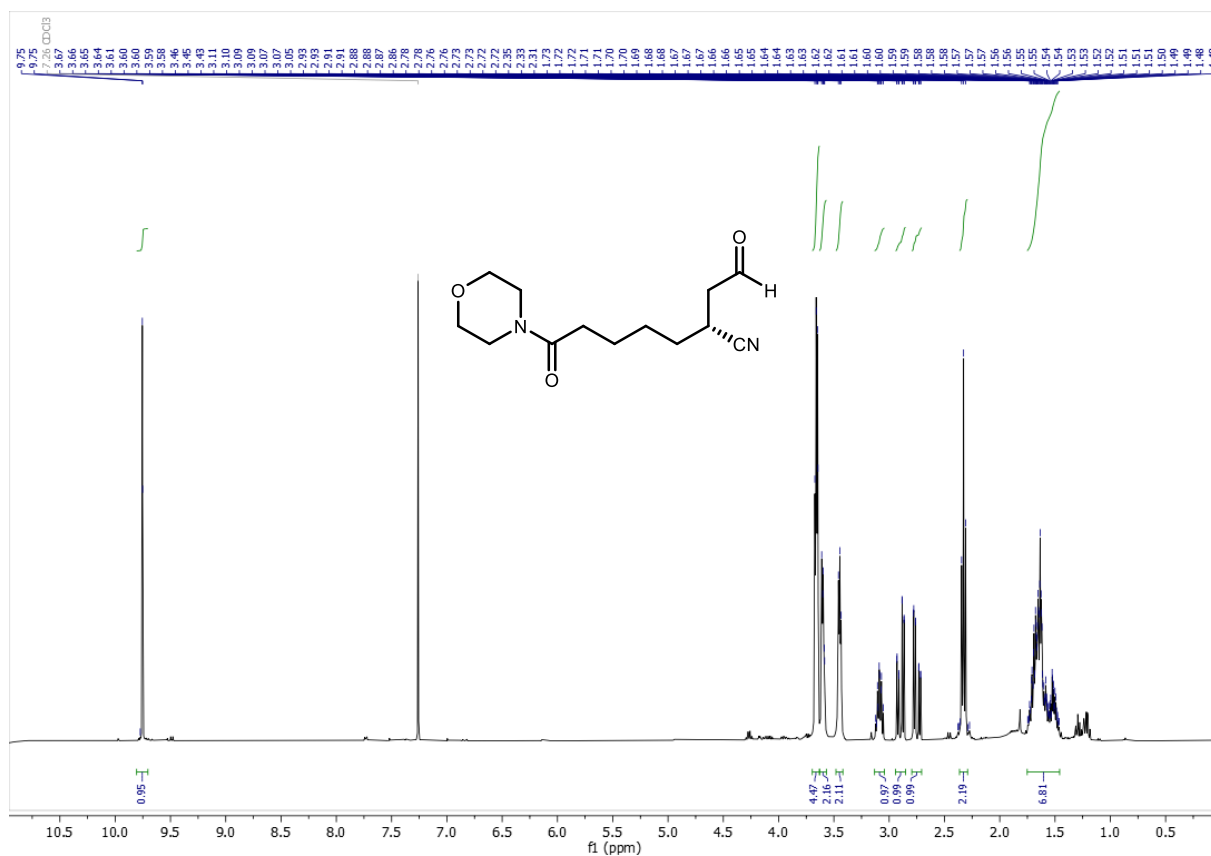

<sup>13</sup>C NMR (101 MHz, CDCl<sub>3</sub>) of **2p**:

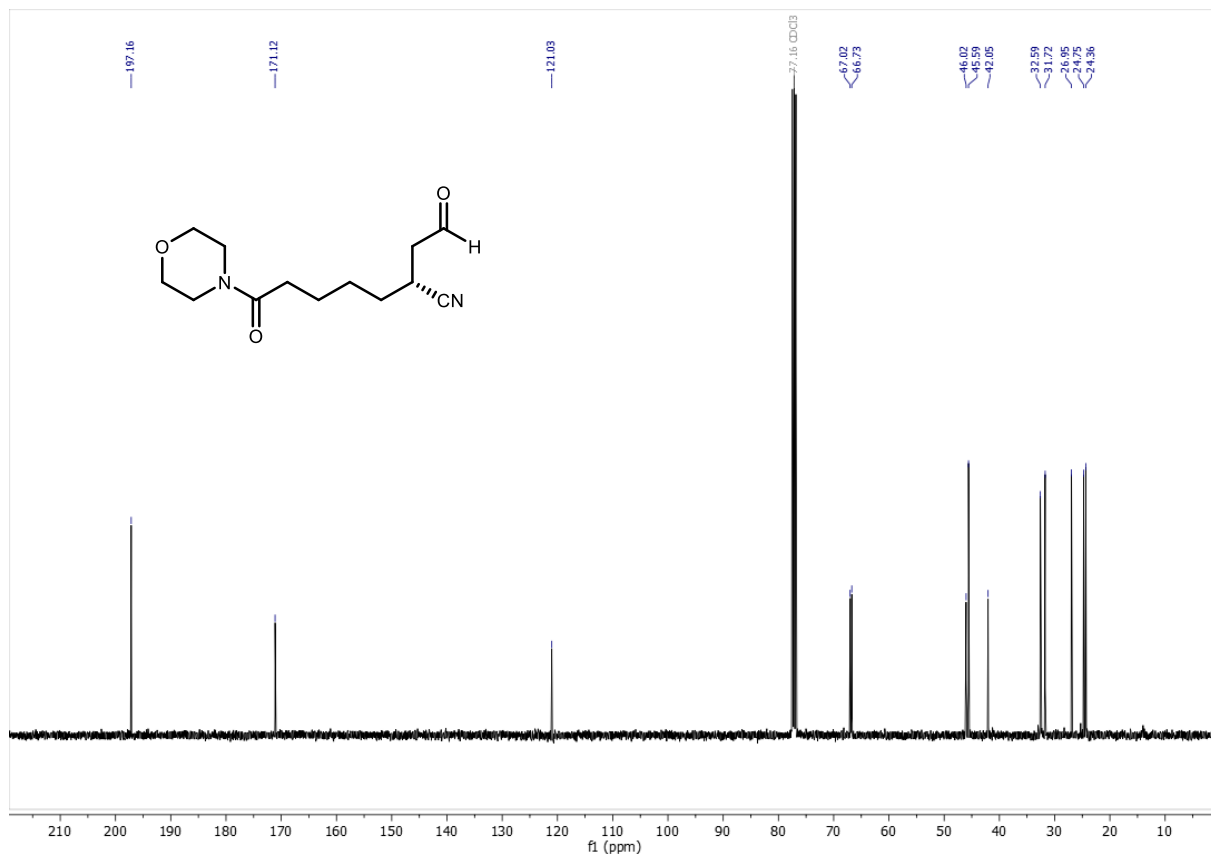

<sup>1</sup>H NMR (400 MHz, CDCl<sub>3</sub>) of **2q**:

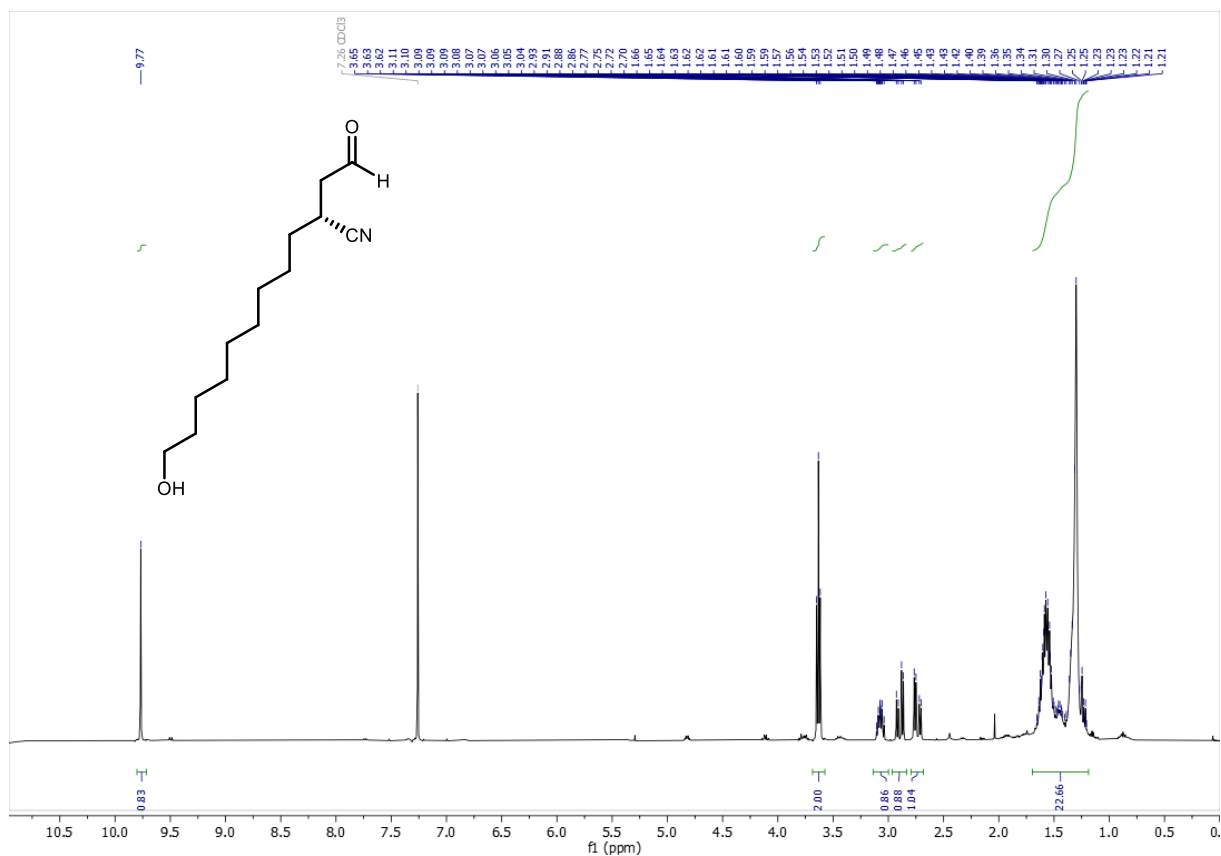

<sup>13</sup>C NMR (101 MHz, CDCl<sub>3</sub>) of **2q**:

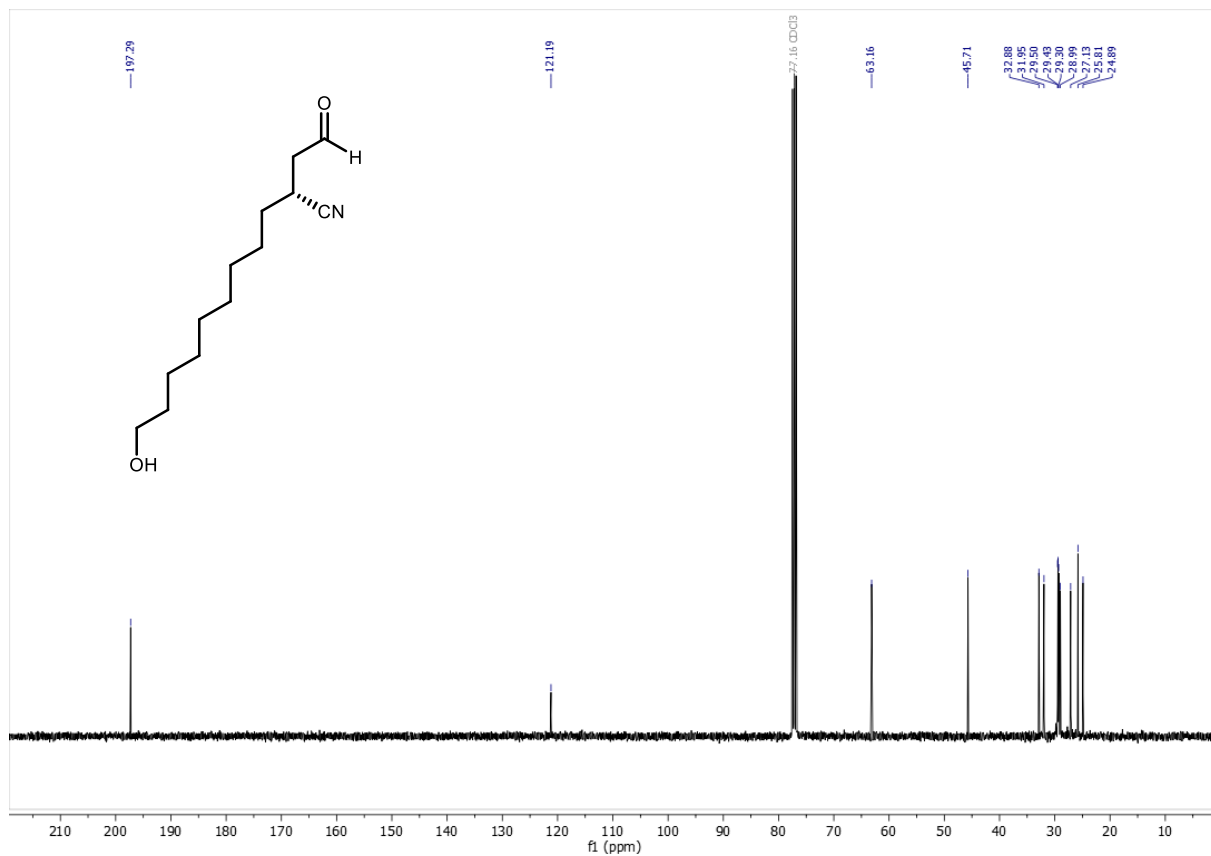

<sup>1</sup>H NMR (400 MHz, CDCl<sub>3</sub>) of **2r**:

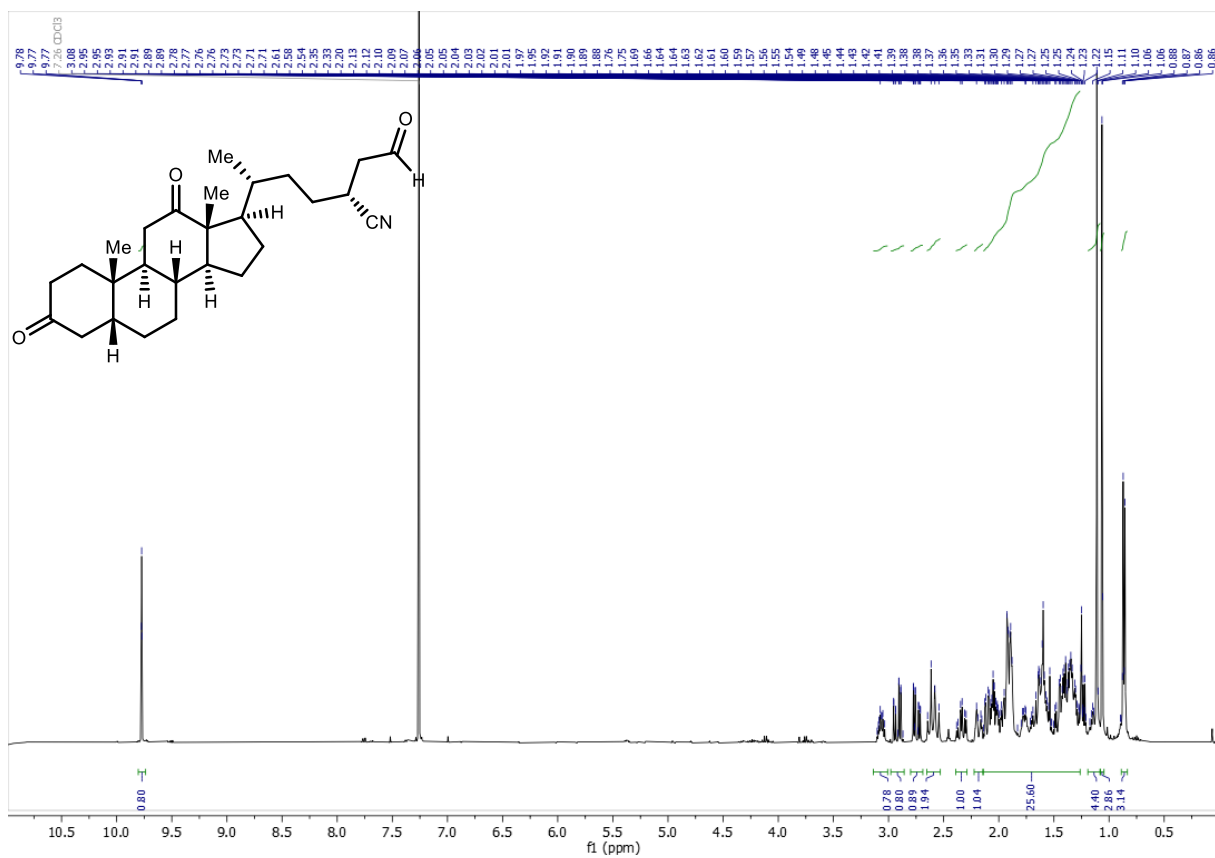

<sup>13</sup>C NMR (101 MHz, CDCl<sub>3</sub>) of **2r**:

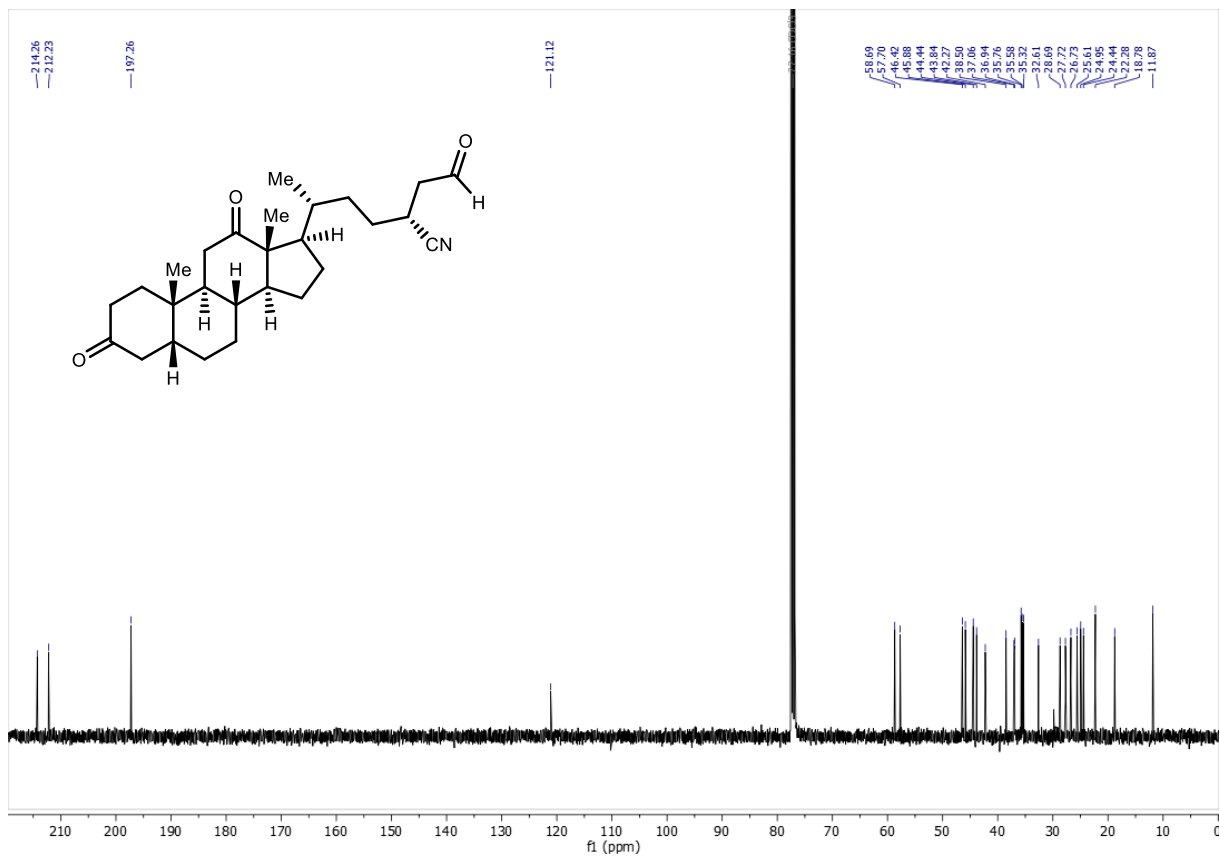

$^1\text{H}$  NMR (400 MHz,  $\text{CDCl}_3$ , mixture of diastereoisomers) of **4a**:

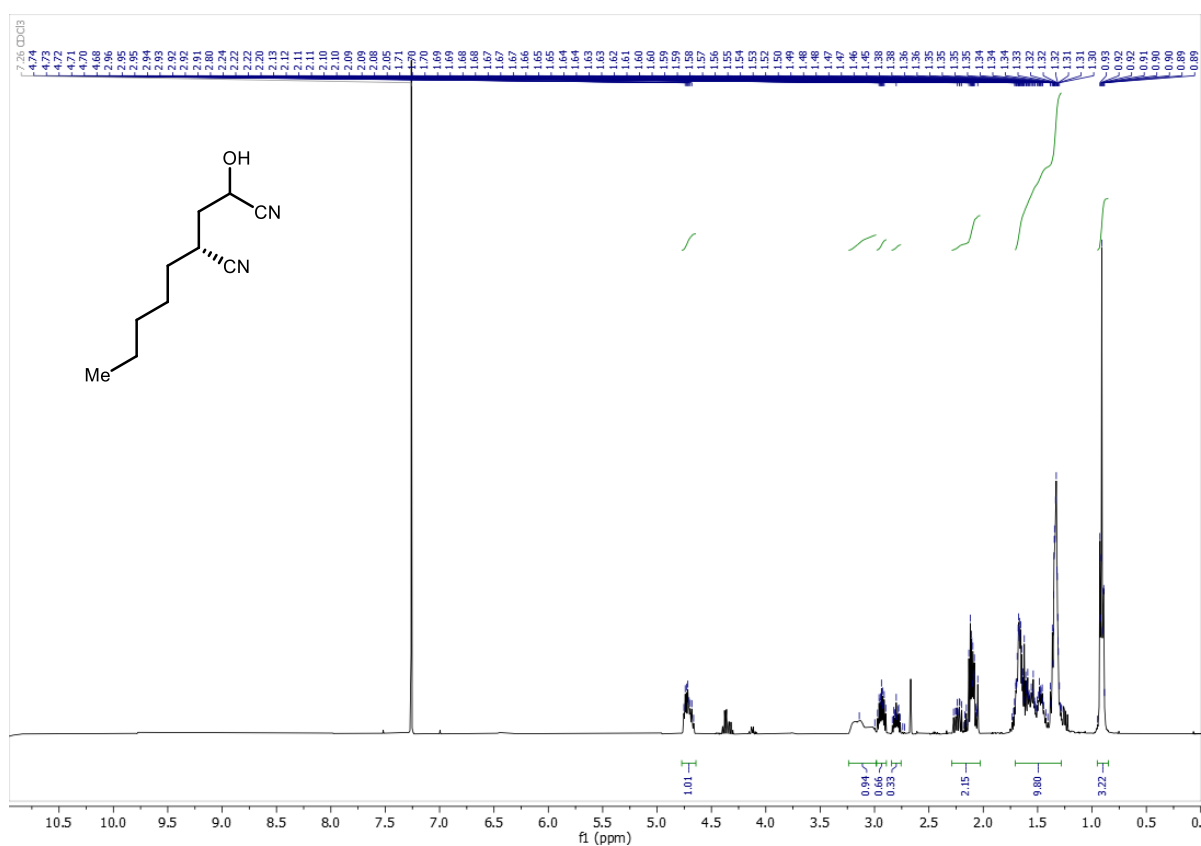

$^{13}\text{C}$  NMR (101 MHz,  $\text{CDCl}_3$ , mixture of diastereoisomers) of **4a**:

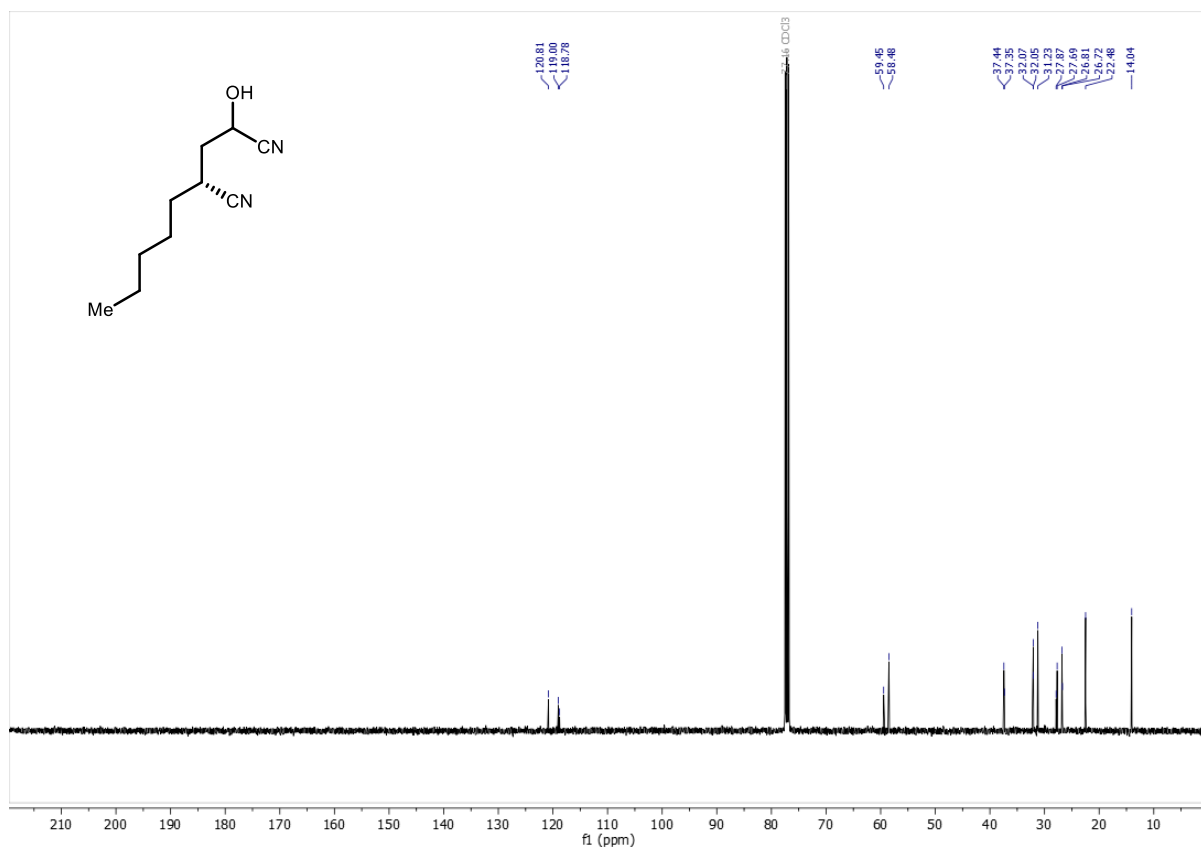

$^1\text{H}$  NMR (400 MHz,  $\text{CD}_3\text{OD}$ ) of **4c**:

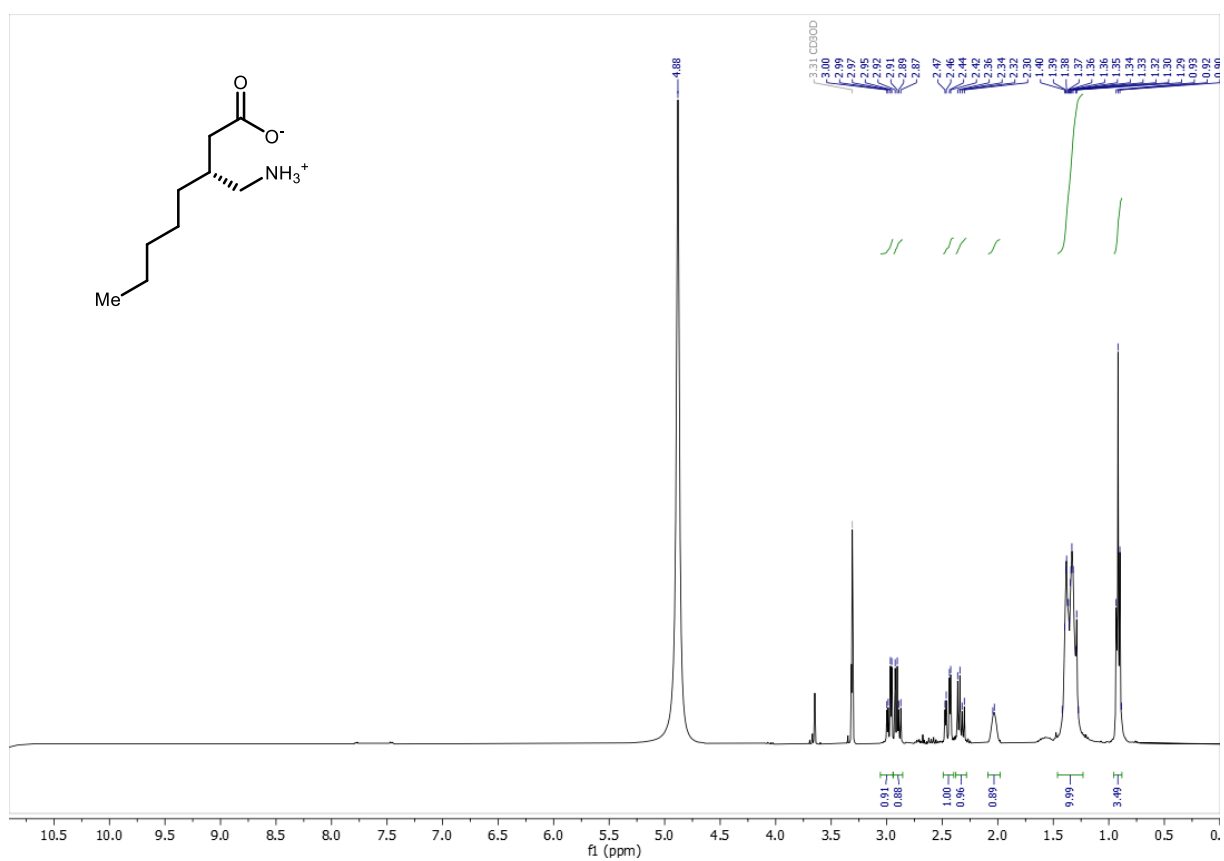

$^{13}\text{C}$  NMR (101 MHz,  $\text{CD}_3\text{OD}$ ) of **4c**:

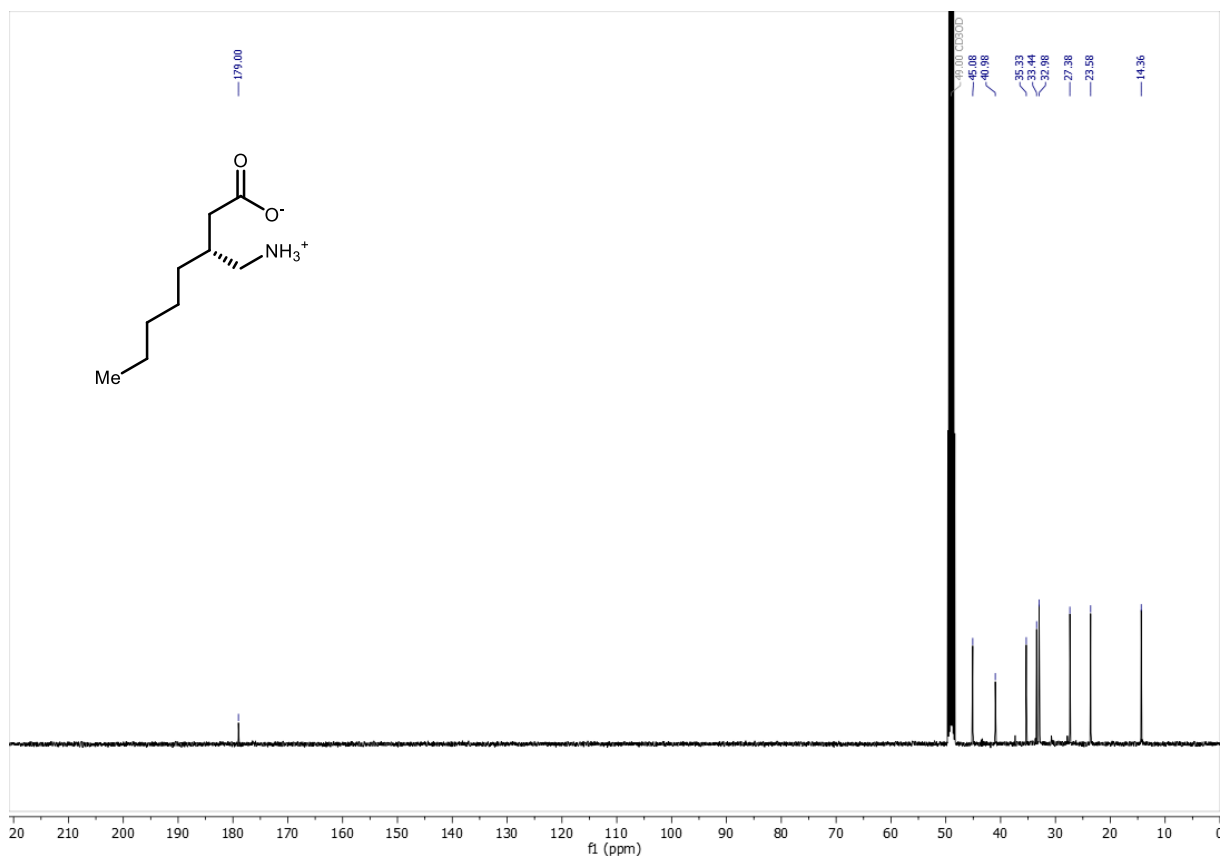



<sup>1</sup>H NMR (400 MHz, CDCl<sub>3</sub>) of **3a'**:

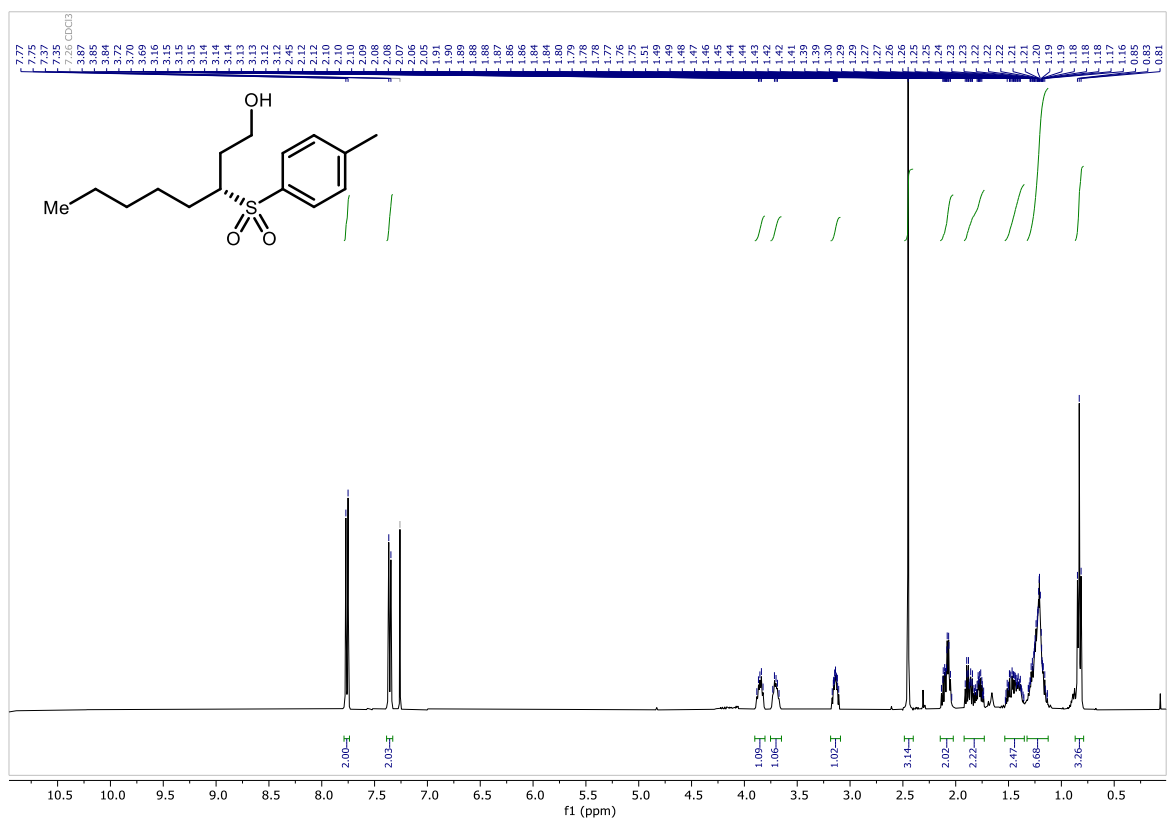

<sup>13</sup>C NMR (126 MHz, CDCl<sub>3</sub>) of **3a'**:

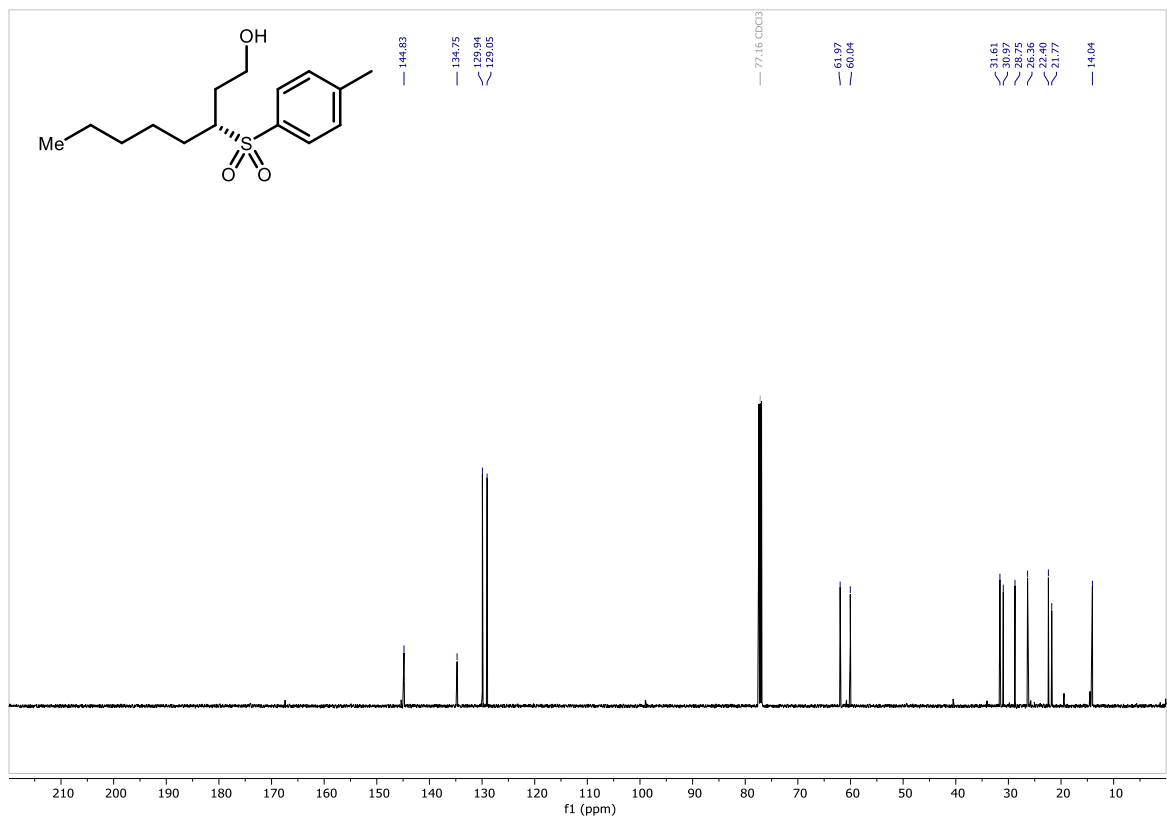

<sup>1</sup>H NMR (400 MHz, CDCl<sub>3</sub>, mixture of diastereoisomers) of **6a**:

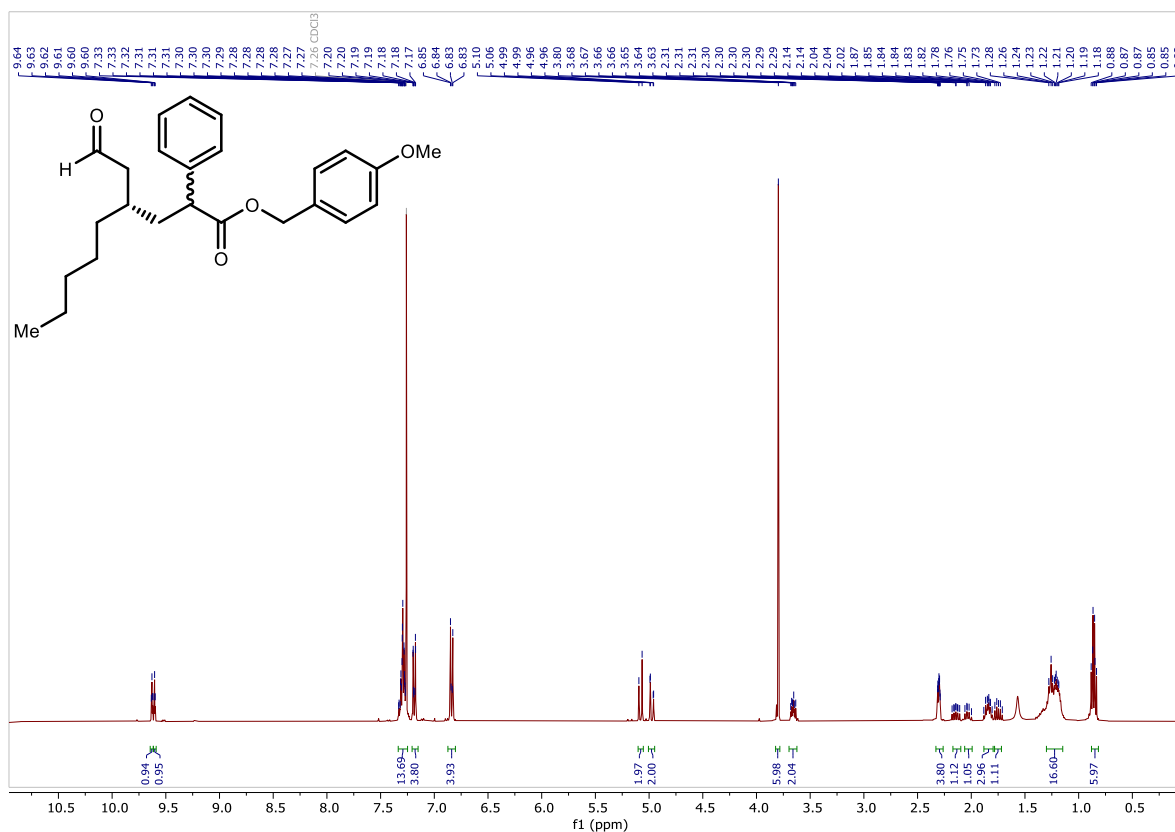

<sup>13</sup>C NMR (101 MHz, CDCl<sub>3</sub>, mixture of diastereoisomers) of **6a**:

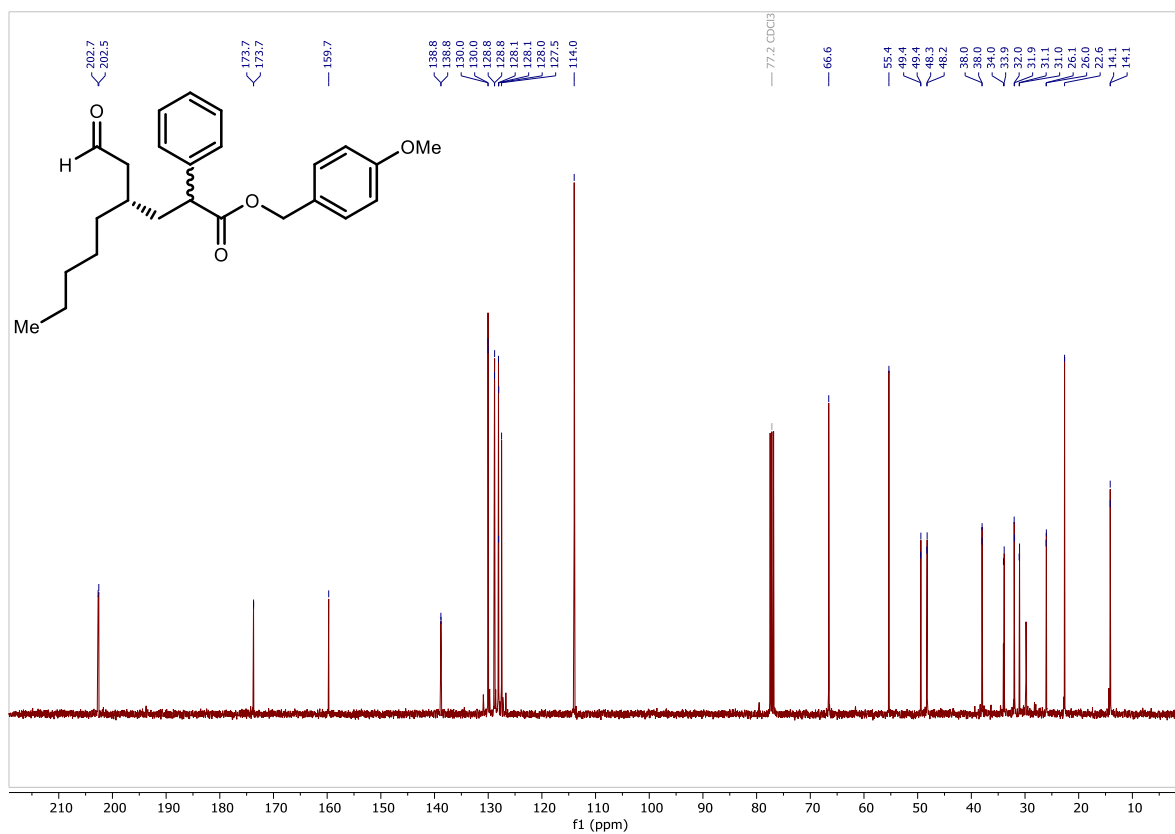

<sup>1</sup>H NMR (500 MHz, CDCl<sub>3</sub>, mixture of diastereoisomers) of **6b**:

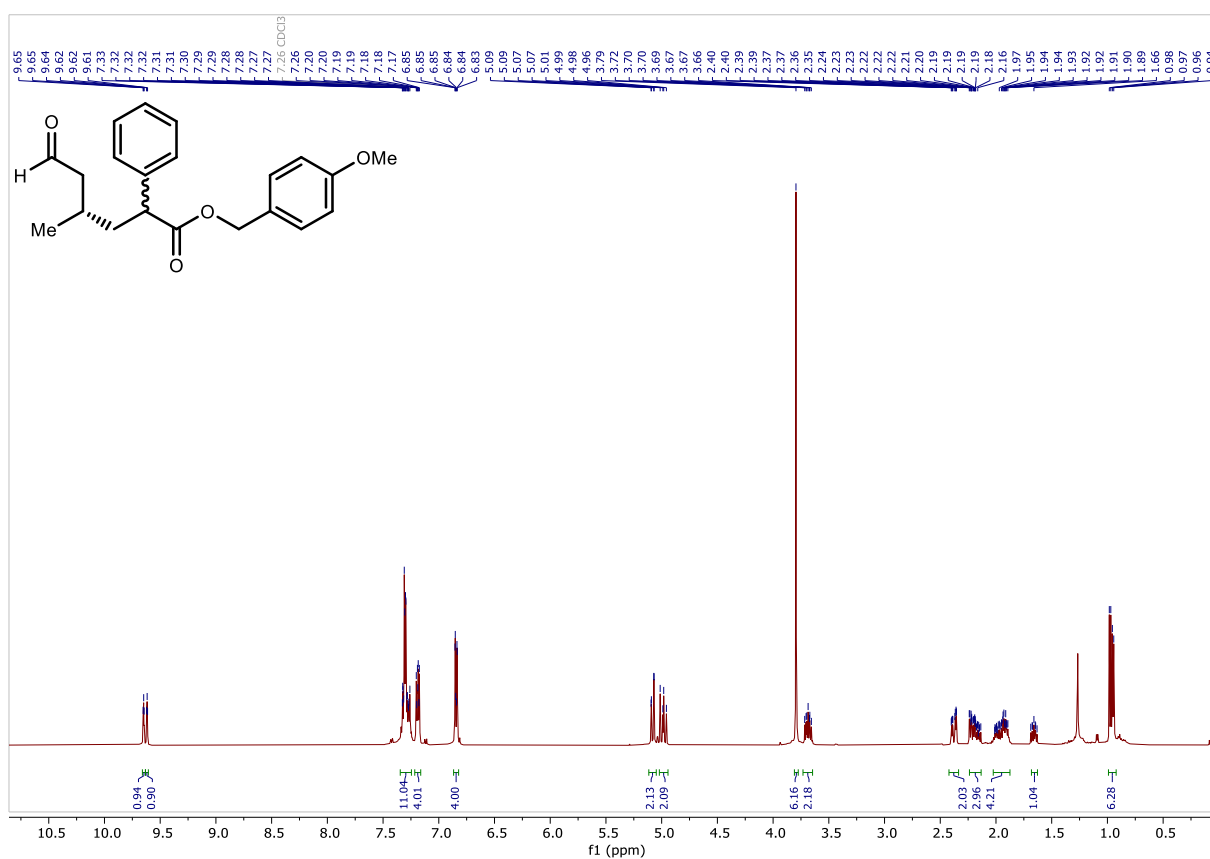

<sup>13</sup>C NMR (126 MHz, CDCl<sub>3</sub>, mixture of diastereoisomers) of **6b**:

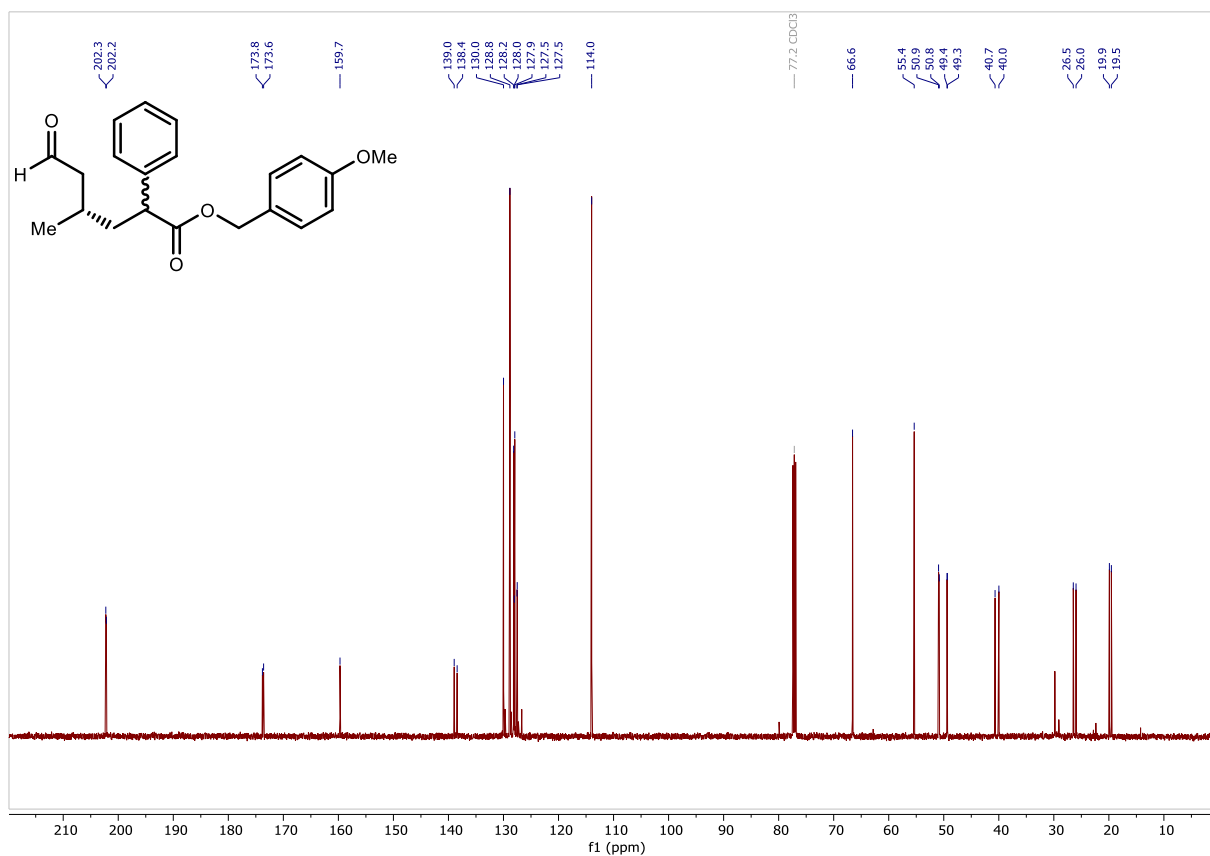

$^1\text{H}$  NMR (400 MHz,  $\text{CDCl}_3$ , mixture of diastereoisomers) of **6c**:

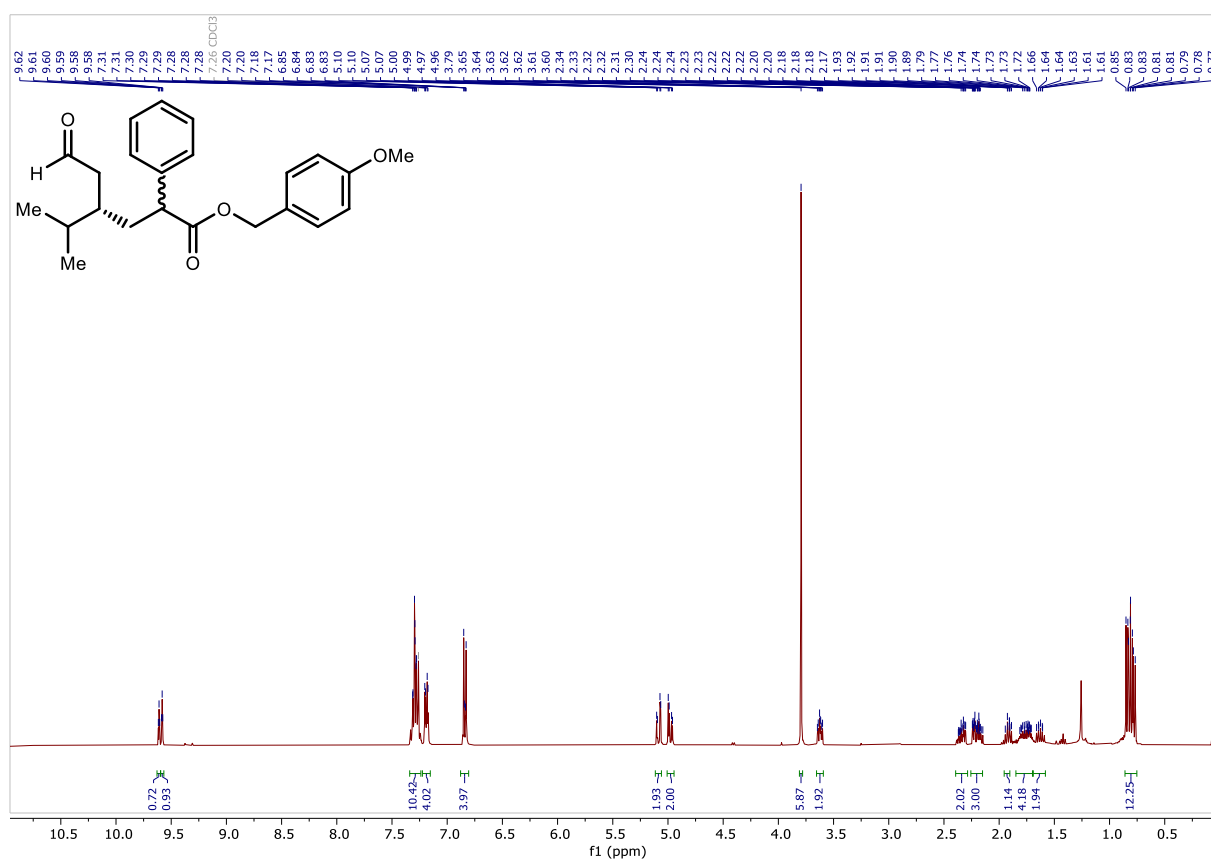

$^{13}\text{C}$  NMR (101 MHz,  $\text{CDCl}_3$ , mixture of diastereoisomers) of **6c**:

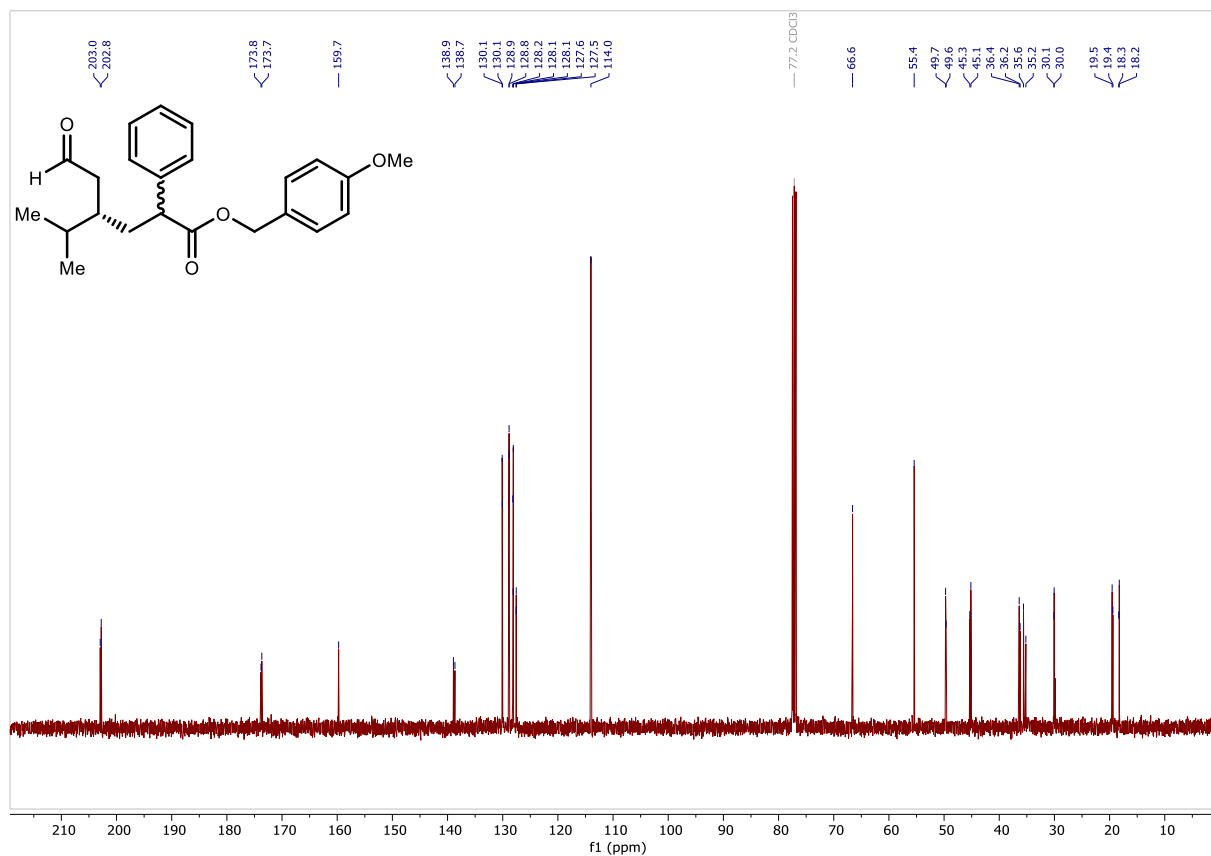

<sup>1</sup>H NMR (400 MHz, CDCl<sub>3</sub>, mixture of diastereoisomers) of **6d**:

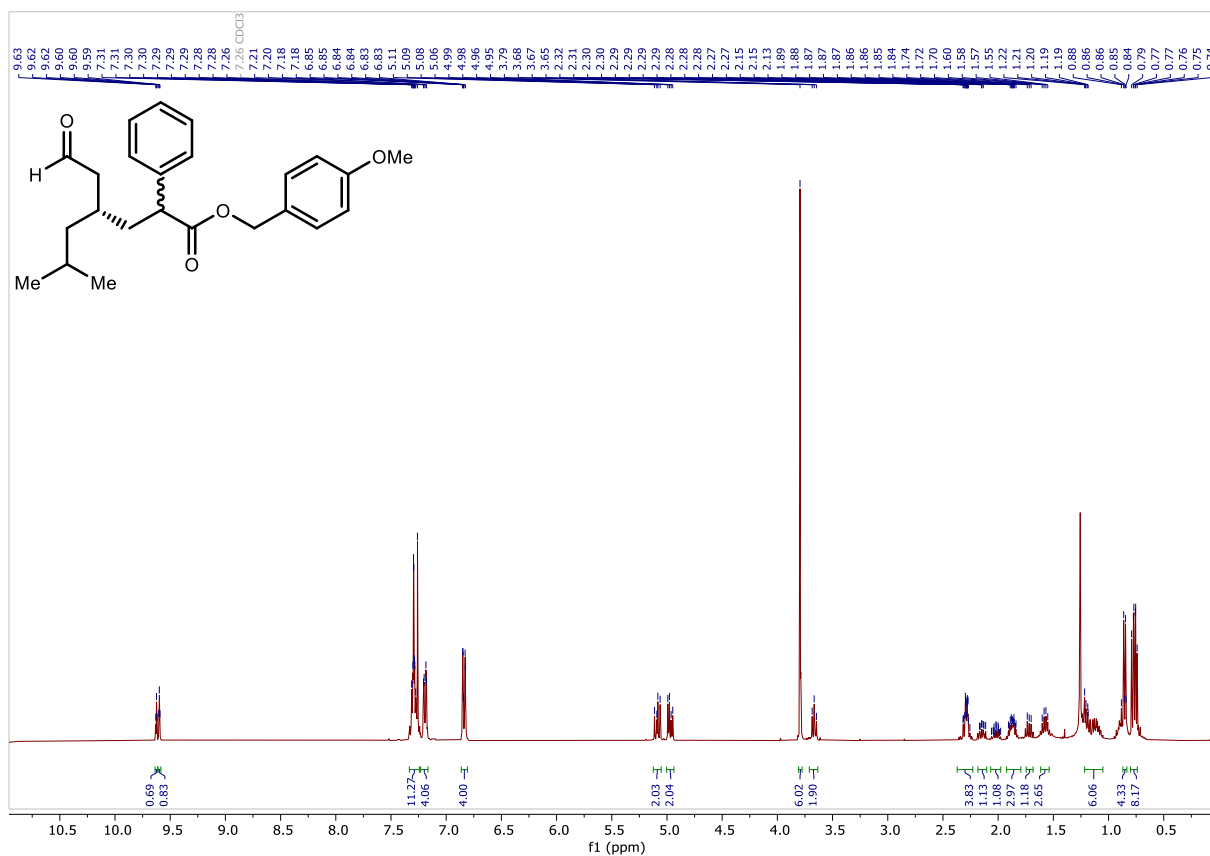

<sup>13</sup>C NMR (101 MHz, CDCl<sub>3</sub>, mixture of diastereoisomers) of **6d**:

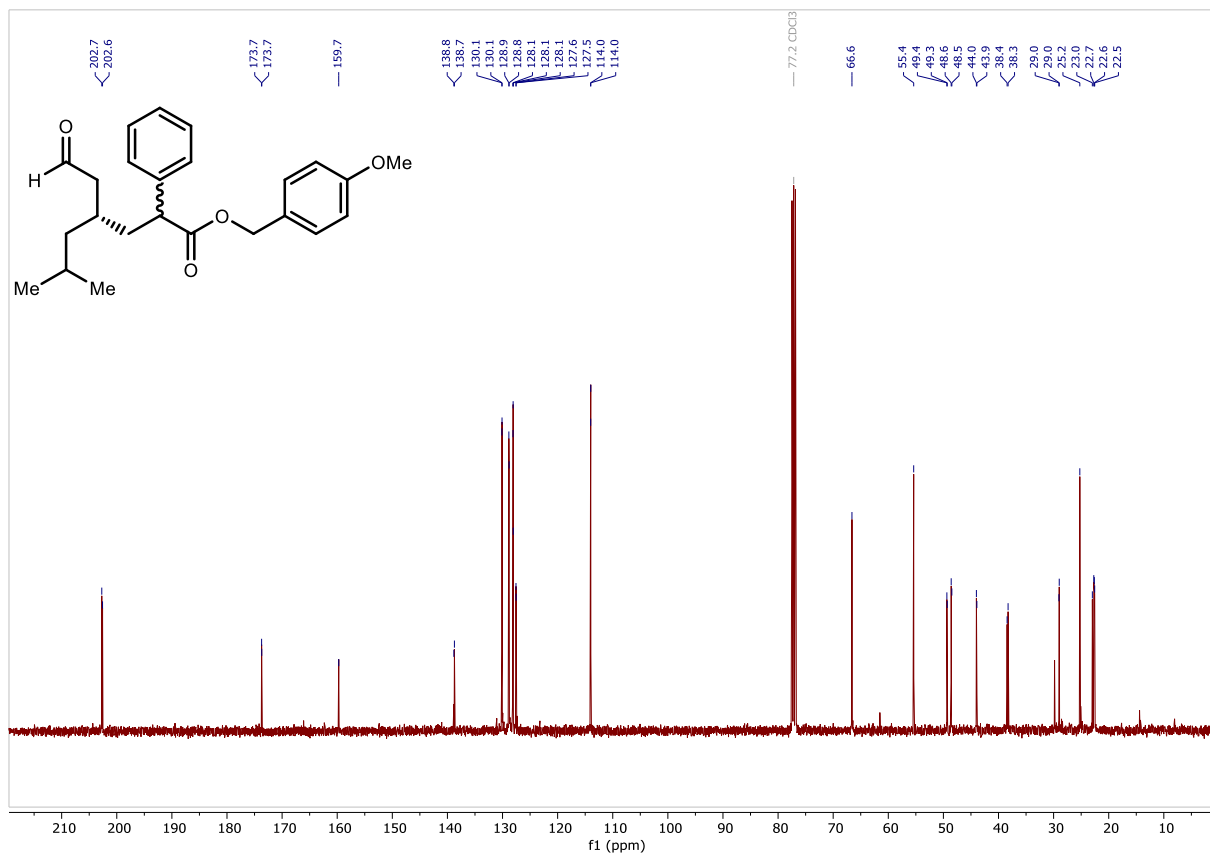

<sup>1</sup>H NMR (500 MHz, CDCl<sub>3</sub>, mixture of diastereoisomers) of **6e**:

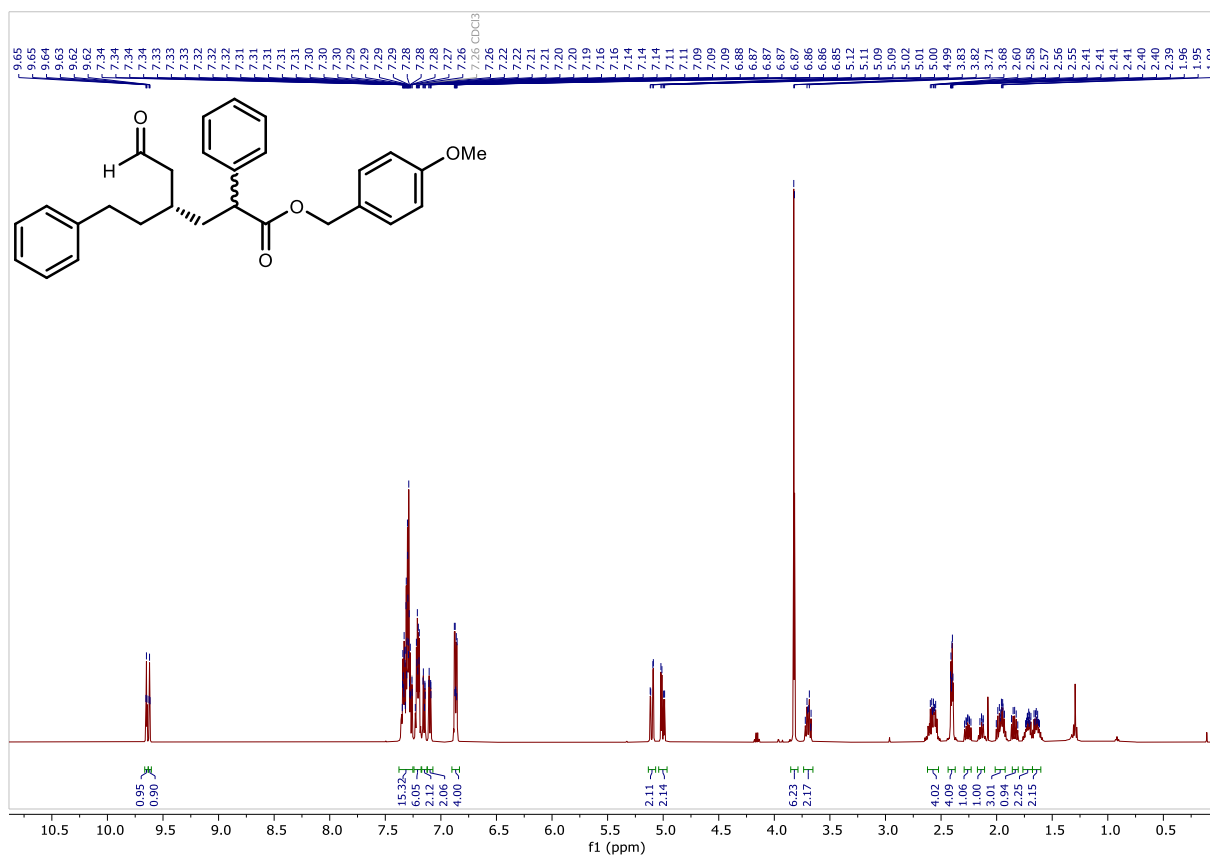

<sup>13</sup>C NMR (126 MHz, CDCl<sub>3</sub>, mixture of diastereoisomers) of **6e**:

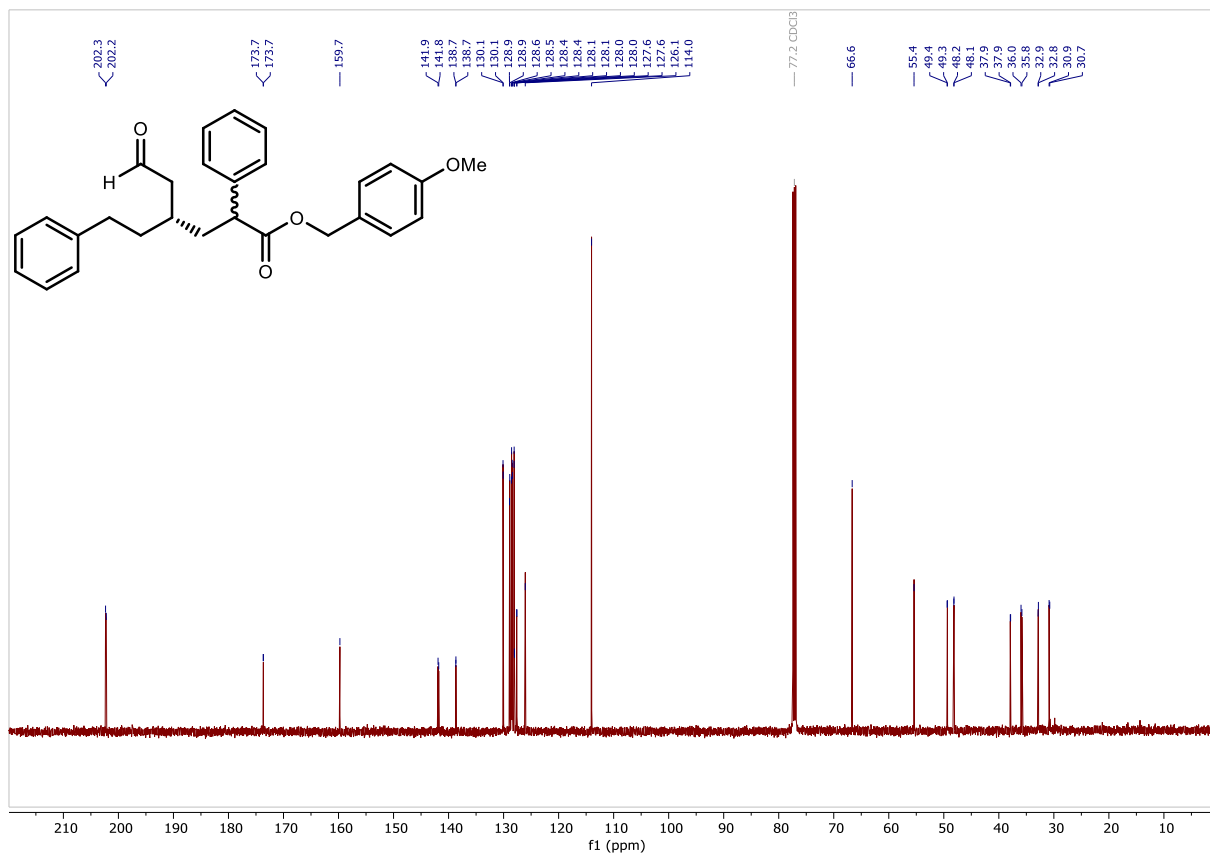

$^1\text{H}$  NMR (500 MHz,  $\text{CDCl}_3$ , mixture of diastereoisomers) of **6f**:

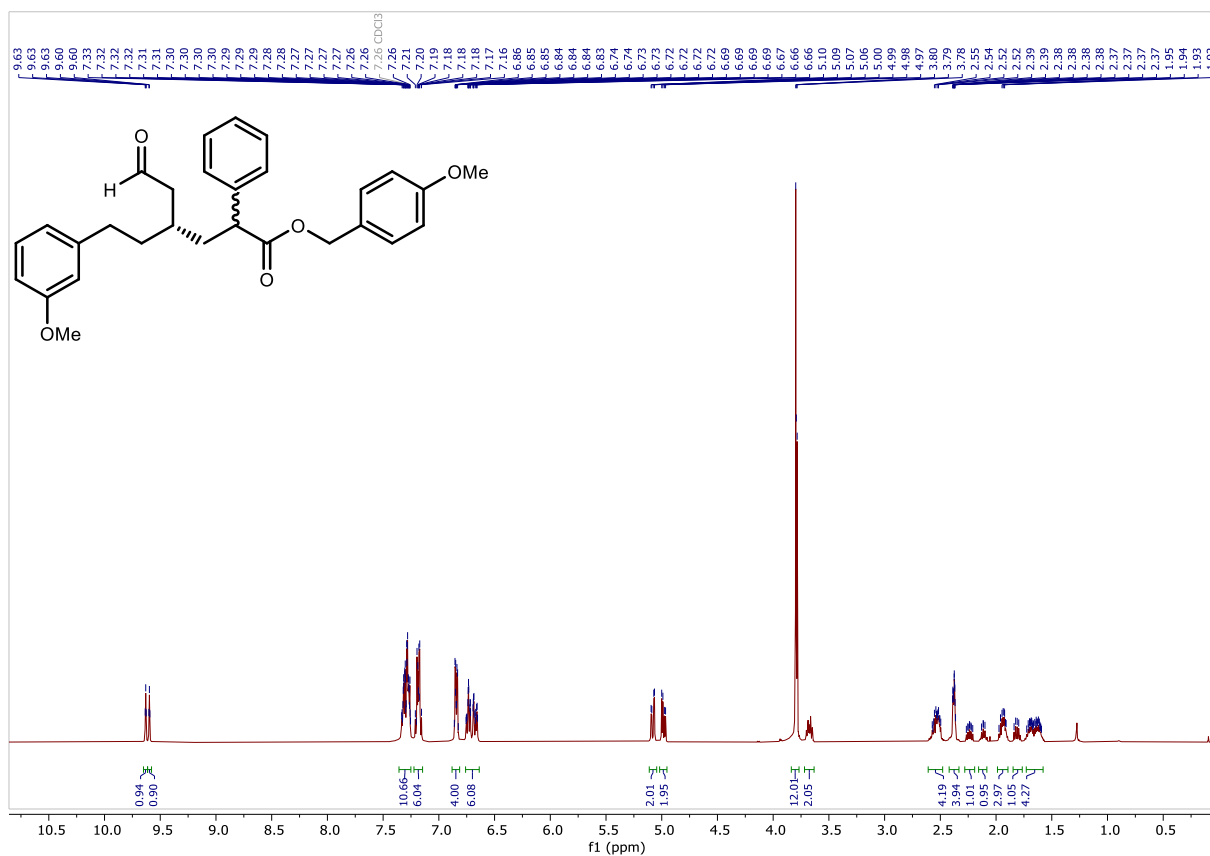

$^{13}\text{C}$  NMR (126 MHz,  $\text{CDCl}_3$ , mixture of diastereoisomers) of **6f**:

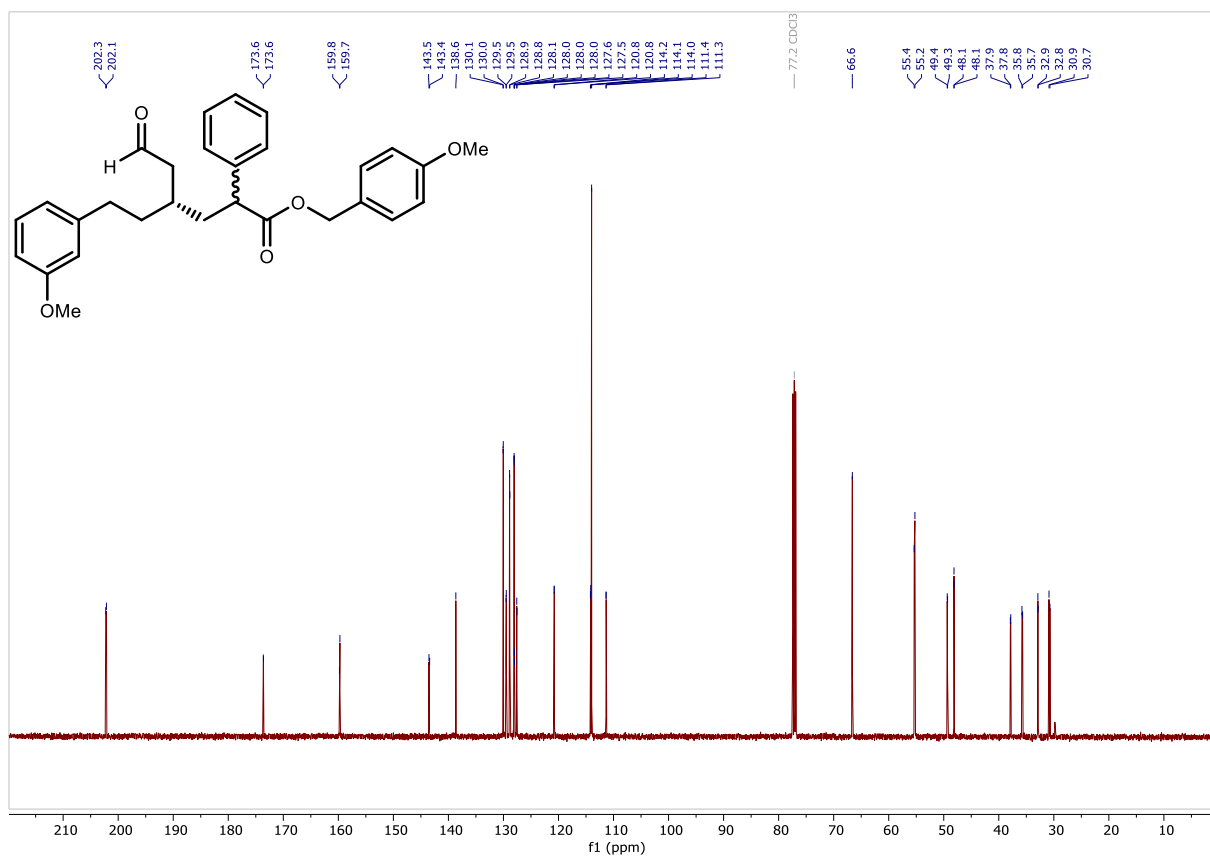

<sup>1</sup>H NMR (400 MHz, CDCl<sub>3</sub>, mixture of diastereoisomers) of **6g**:

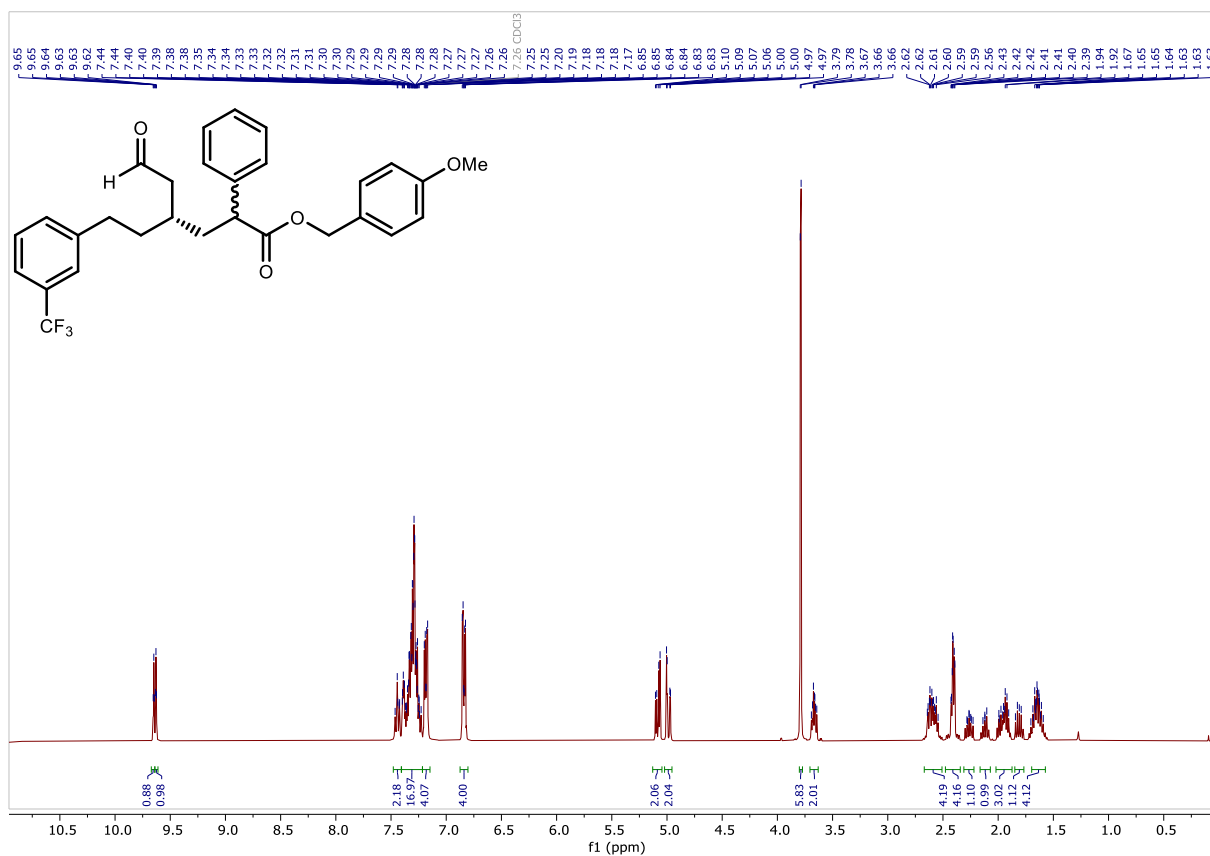

<sup>13</sup>C NMR (101 MHz, CDCl<sub>3</sub>, mixture of diastereoisomers) of **6g**:

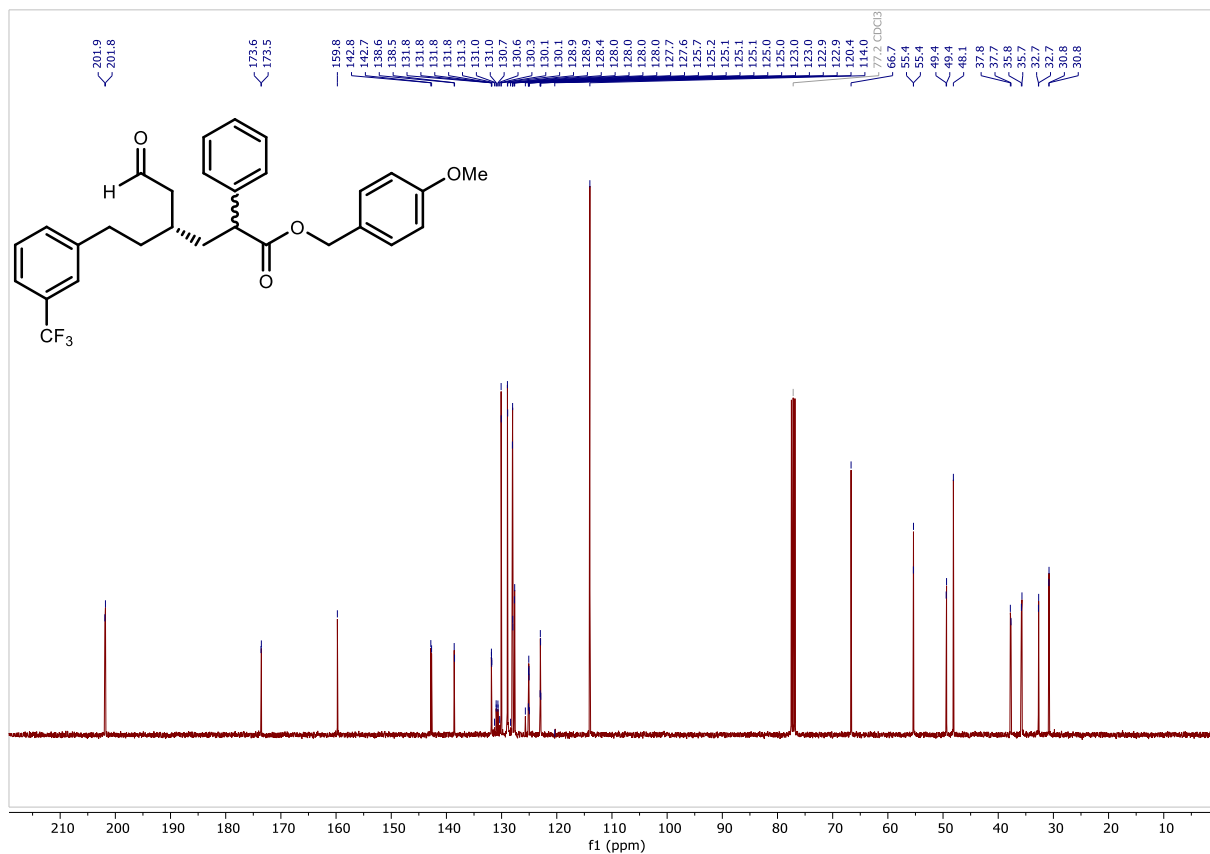



$^{19}\text{F}$  NMR (376 MHz,  $\text{CDCl}_3$ , mixture of diastereoisomers) of **6g**:

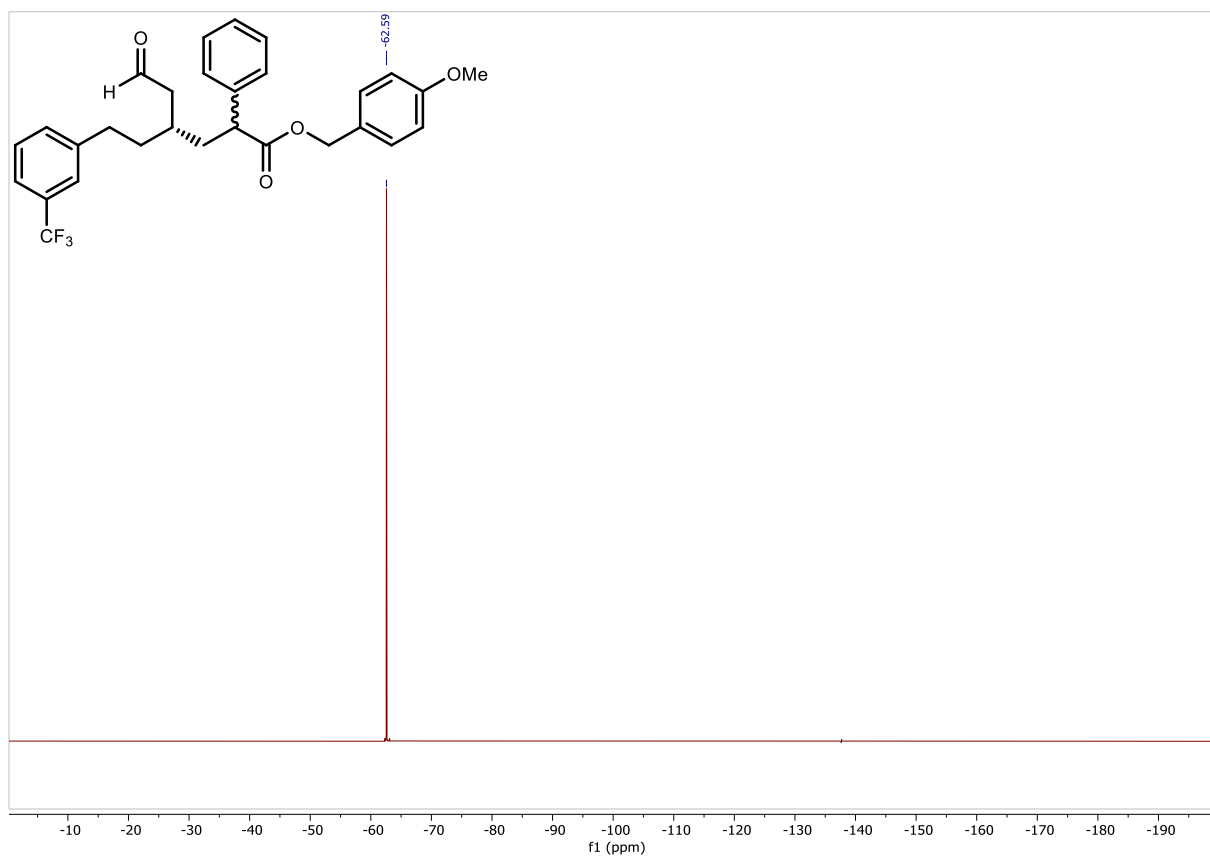

<sup>1</sup>H NMR (500 MHz, CDCl<sub>3</sub>, mixture of diastereoisomers) of **6h**:

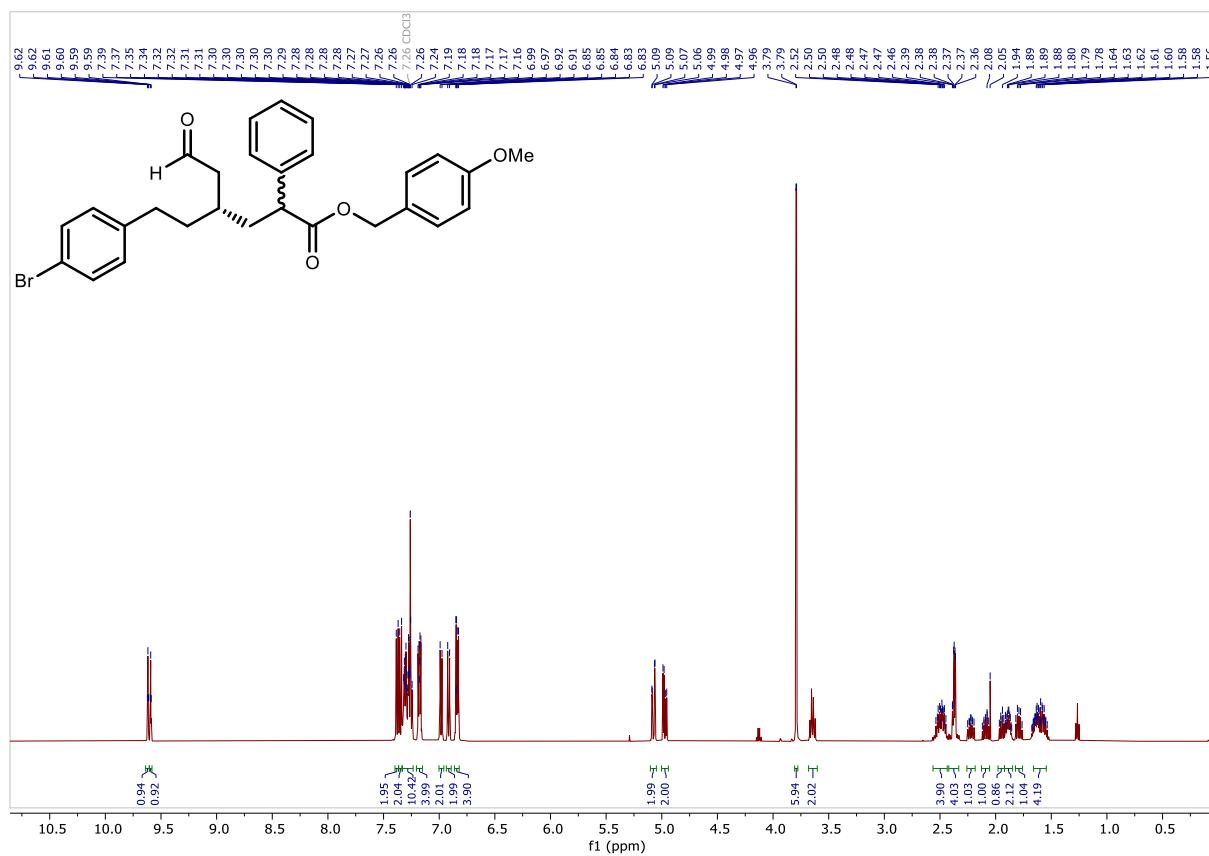

<sup>13</sup>C NMR (126 MHz, CDCl<sub>3</sub>, mixture of diastereoisomers) of **6h**:

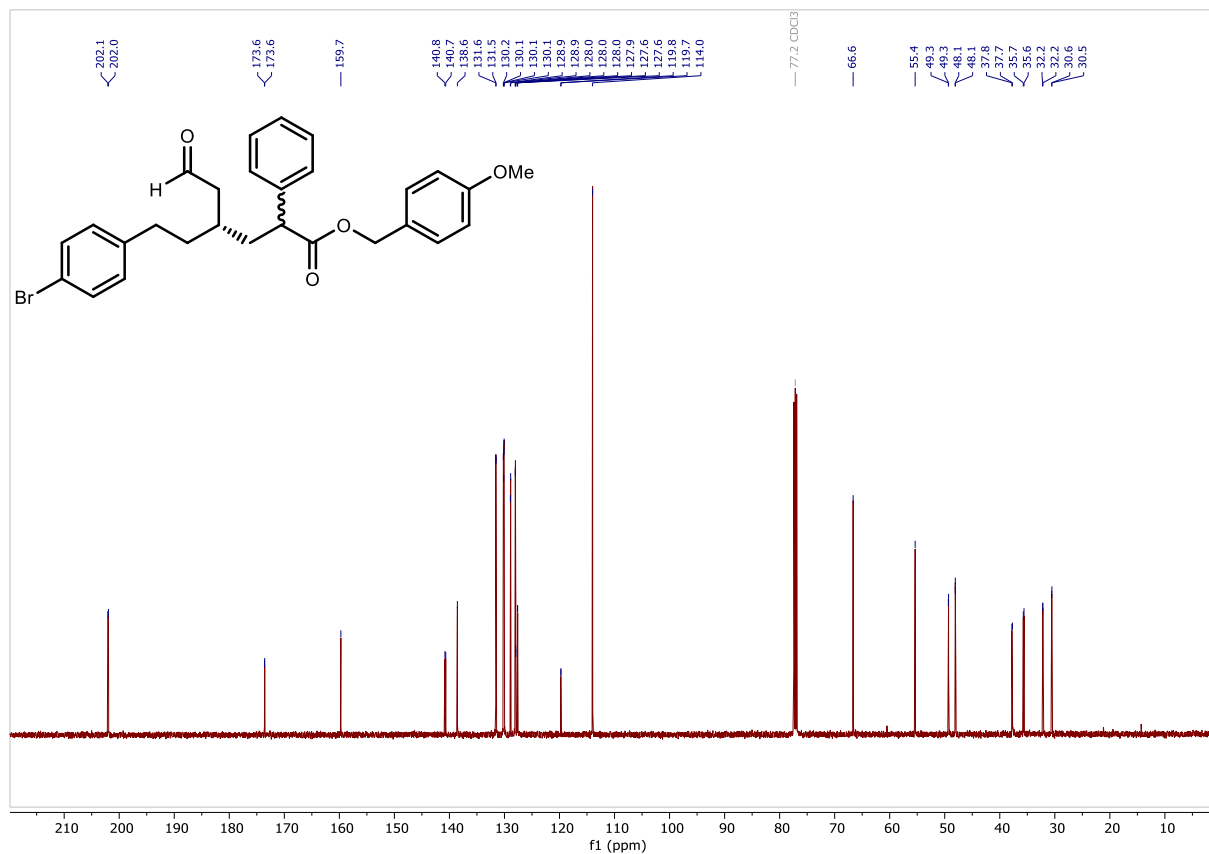

<sup>1</sup>H NMR (500 MHz, CDCl<sub>3</sub>, mixture of diastereoisomers) of **6i**:

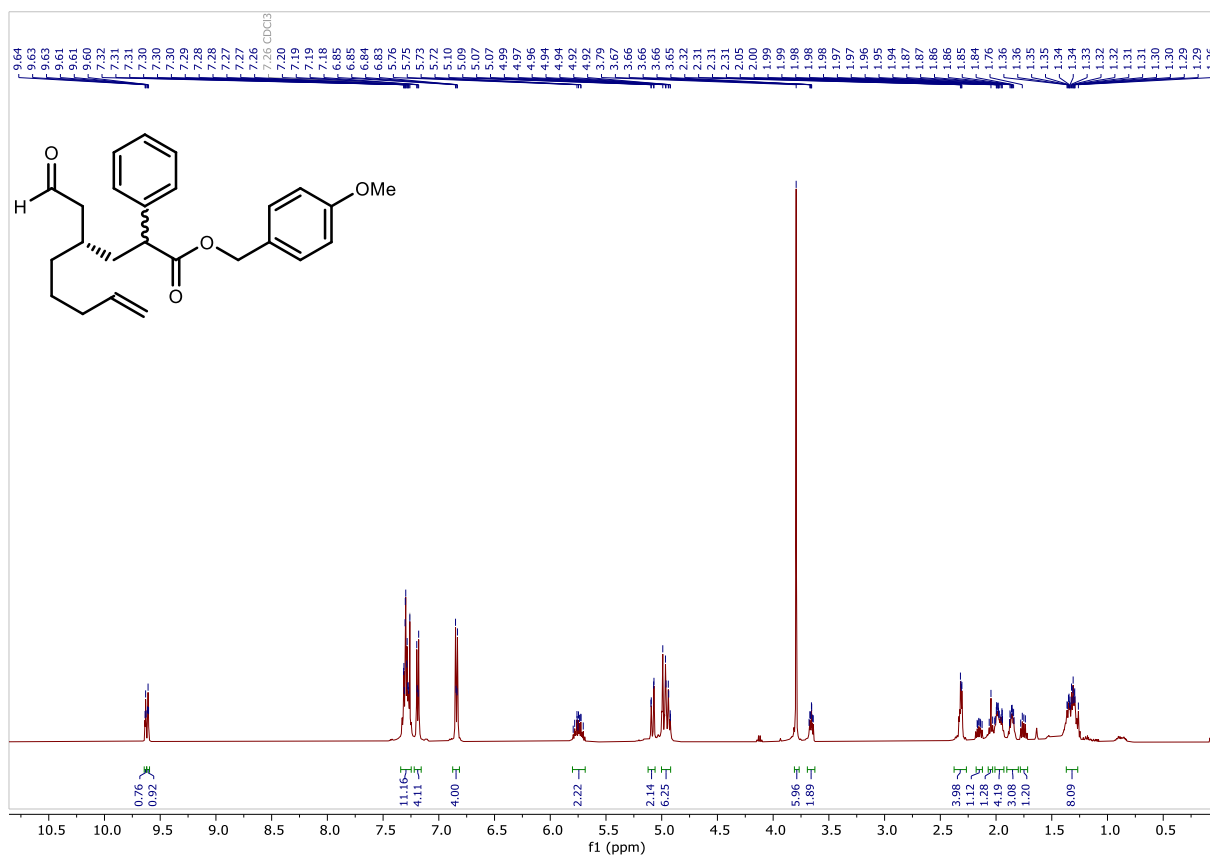

<sup>13</sup>C NMR (126 MHz, CDCl<sub>3</sub>, mixture of diastereoisomers) of **6i**:

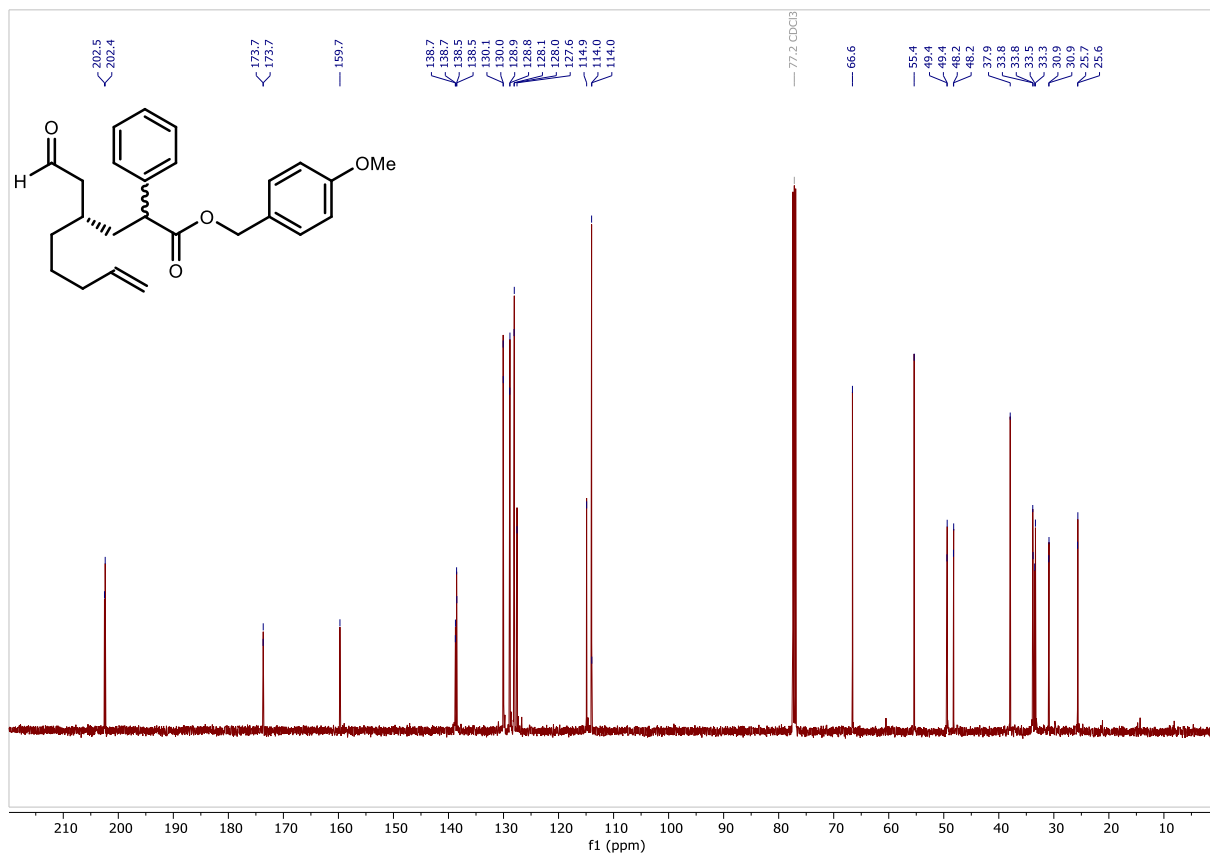

<sup>1</sup>H NMR (400 MHz, CDCl<sub>3</sub>, mixture of diastereoisomers) of **6j**:

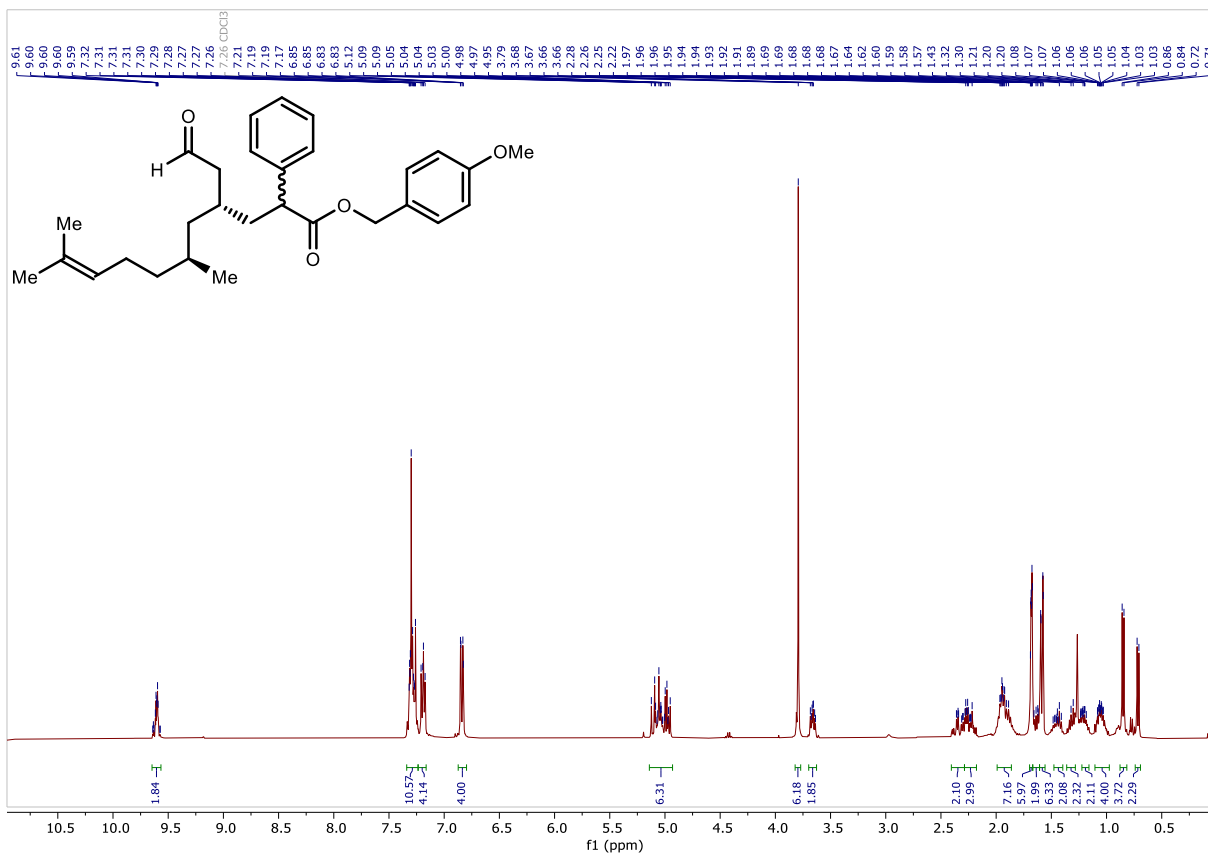

<sup>13</sup>C NMR (101 MHz, CDCl<sub>3</sub>, mixture of diastereoisomers) of **6j**:

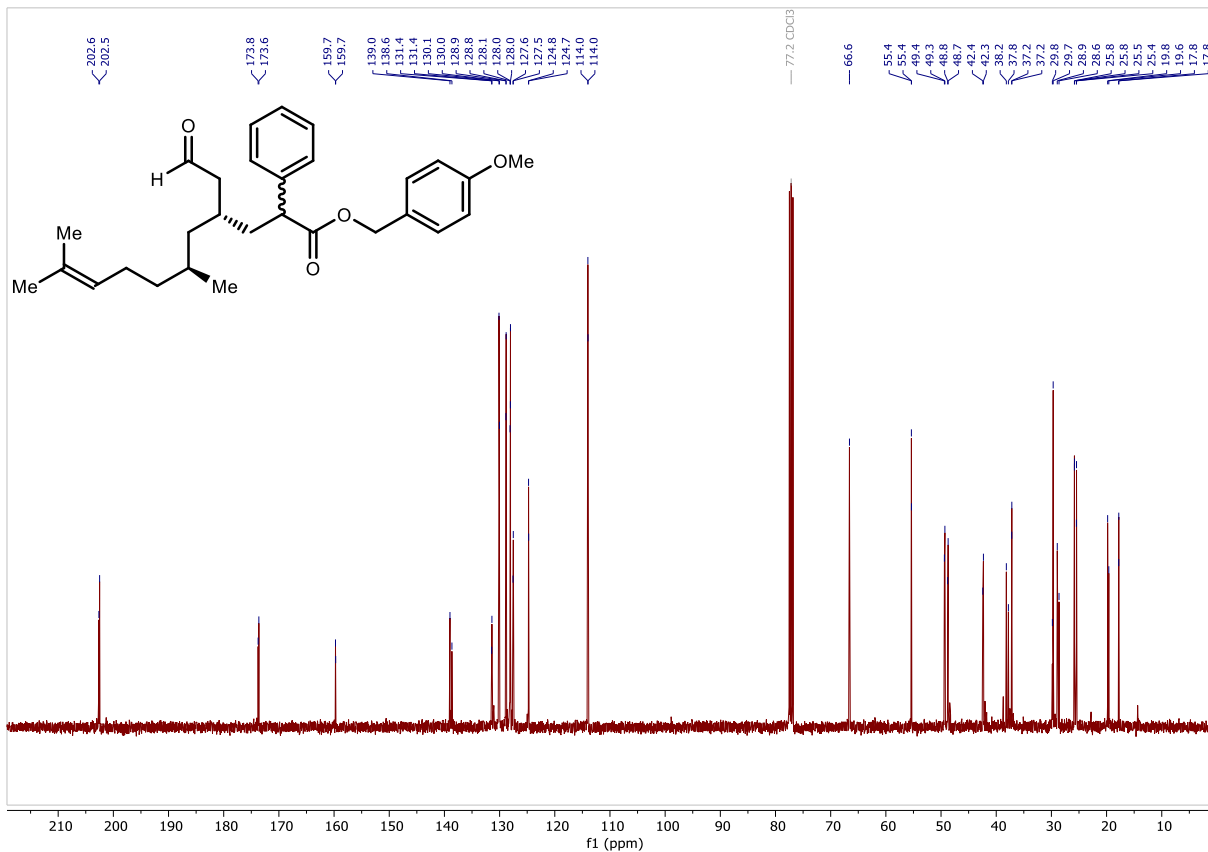

<sup>1</sup>H NMR (500 MHz, CDCl<sub>3</sub>, mixture of diastereoisomers) of **6k**:

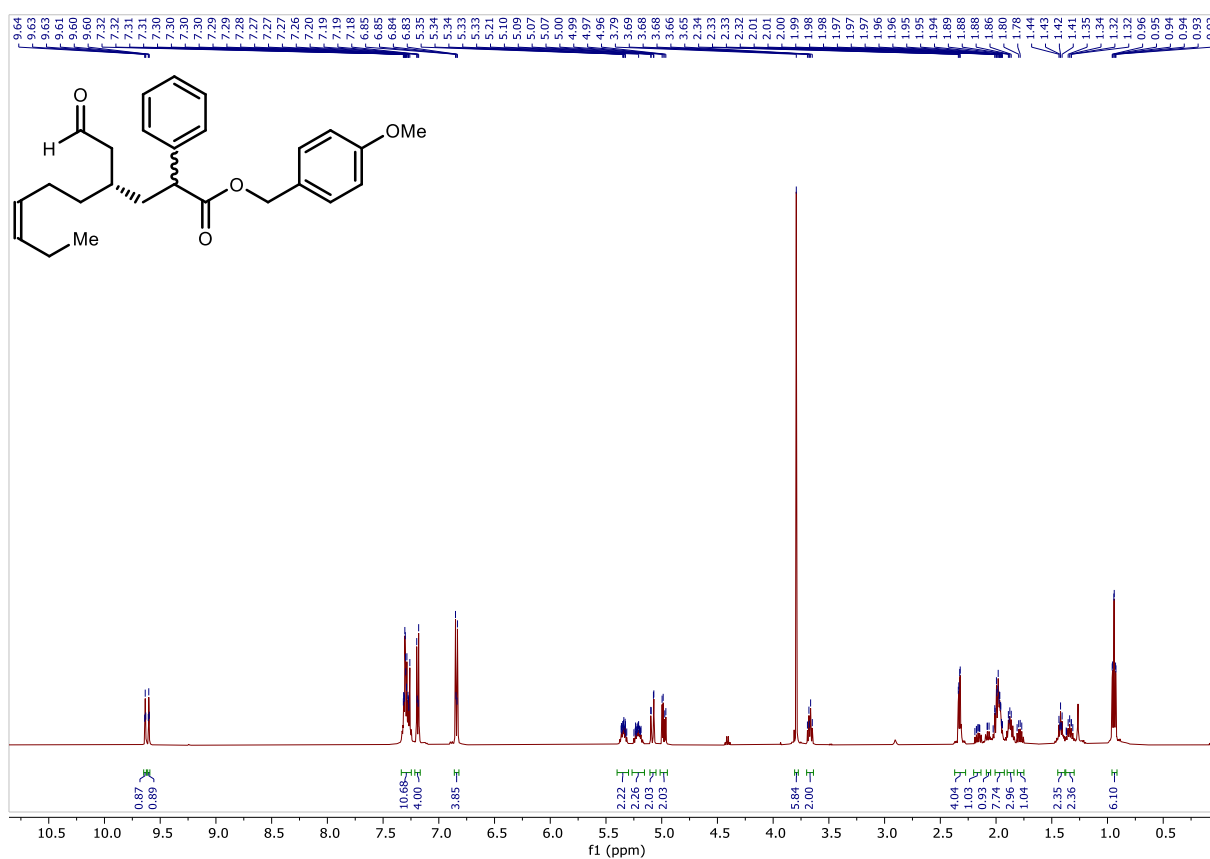

<sup>13</sup>C NMR (126 MHz, CDCl<sub>3</sub>, mixture of diastereoisomers) of **6k**:

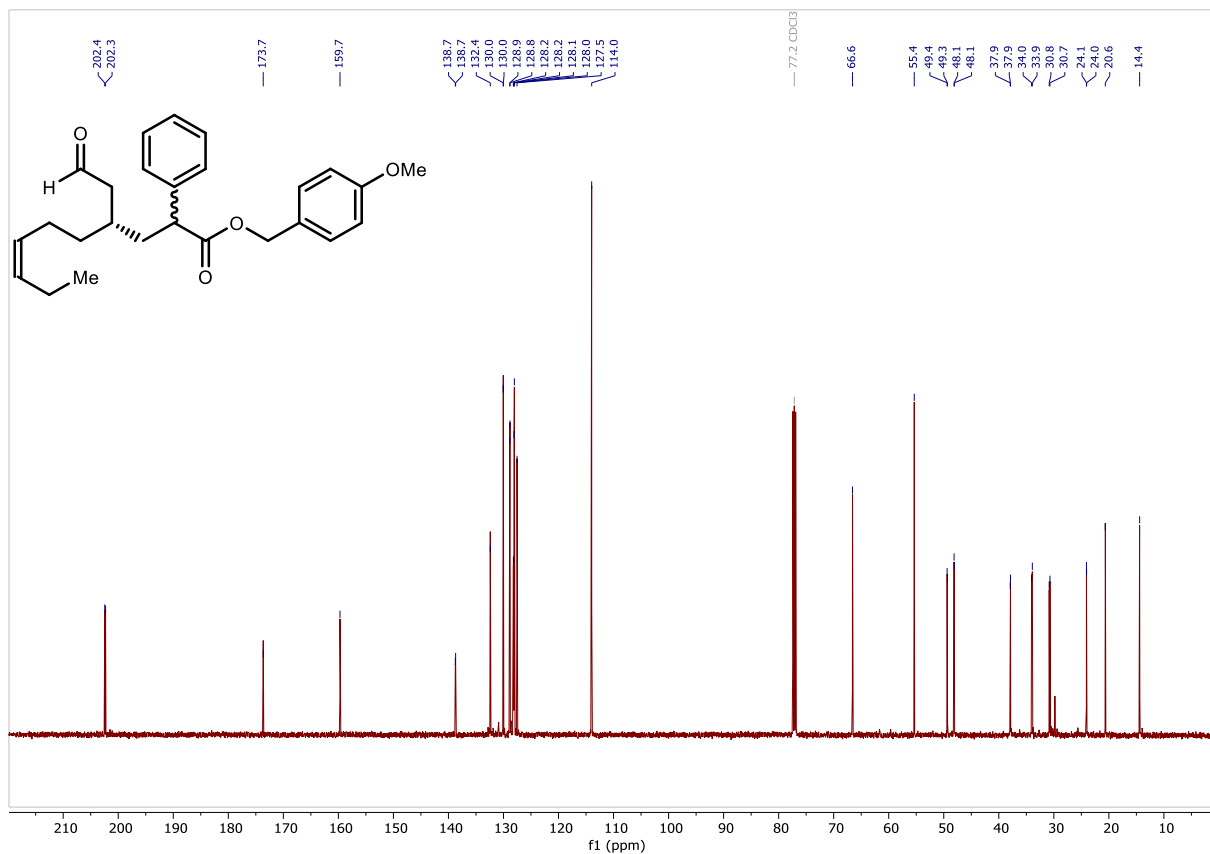

$^1\text{H}$  NMR (400 MHz,  $\text{CDCl}_3$ , mixture of diastereoisomers) of **6l**:

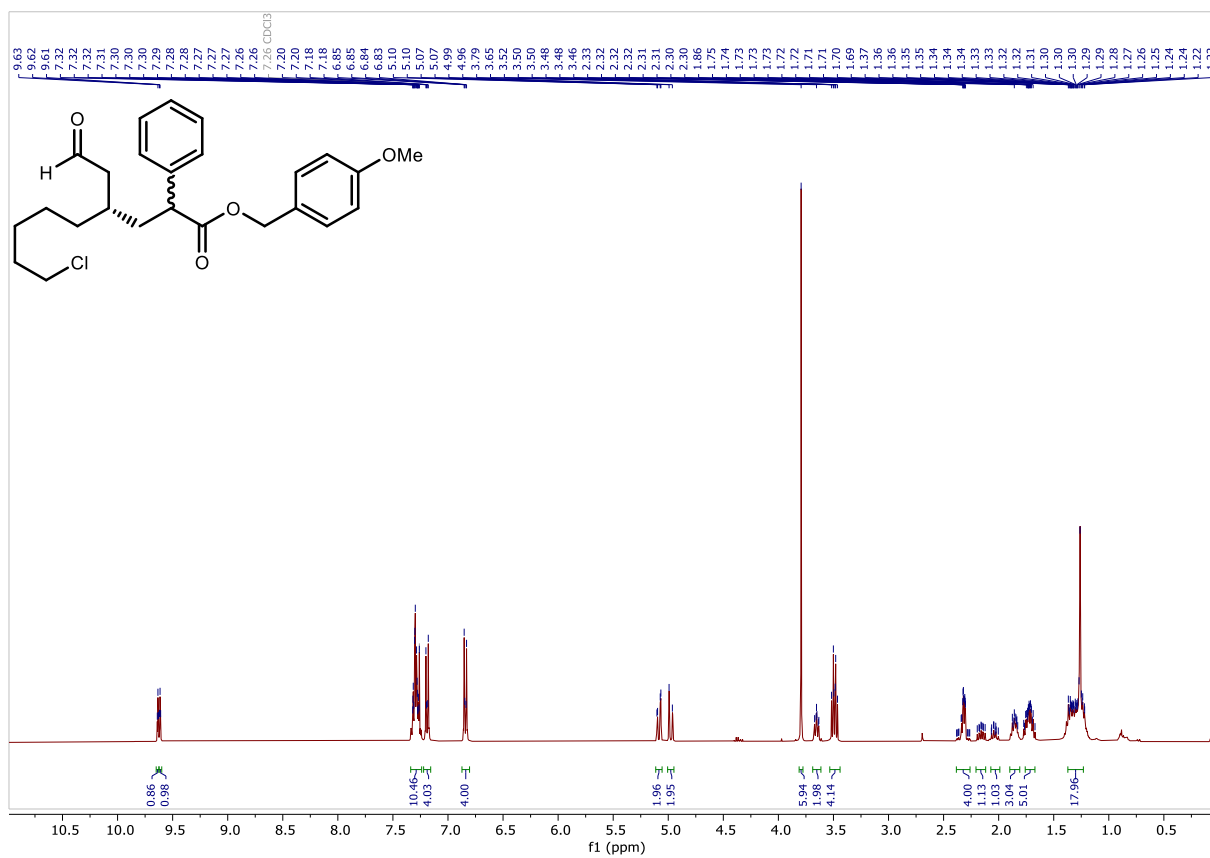

$^{13}\text{C}$  NMR (101 MHz,  $\text{CDCl}_3$ , mixture of diastereoisomers) of **6l**:

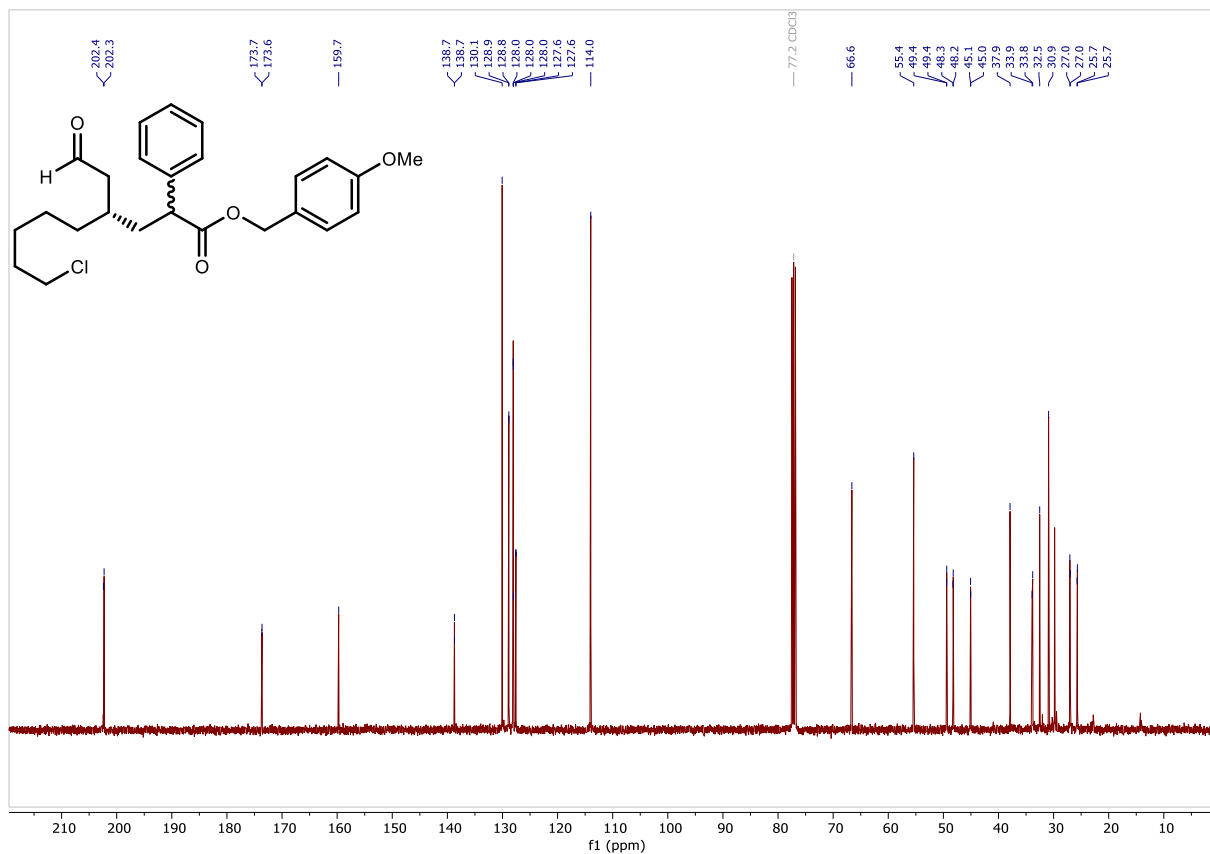

$^1\text{H}$  NMR (500 MHz,  $\text{CDCl}_3$ , mixture of diastereoisomers) of **6m**:

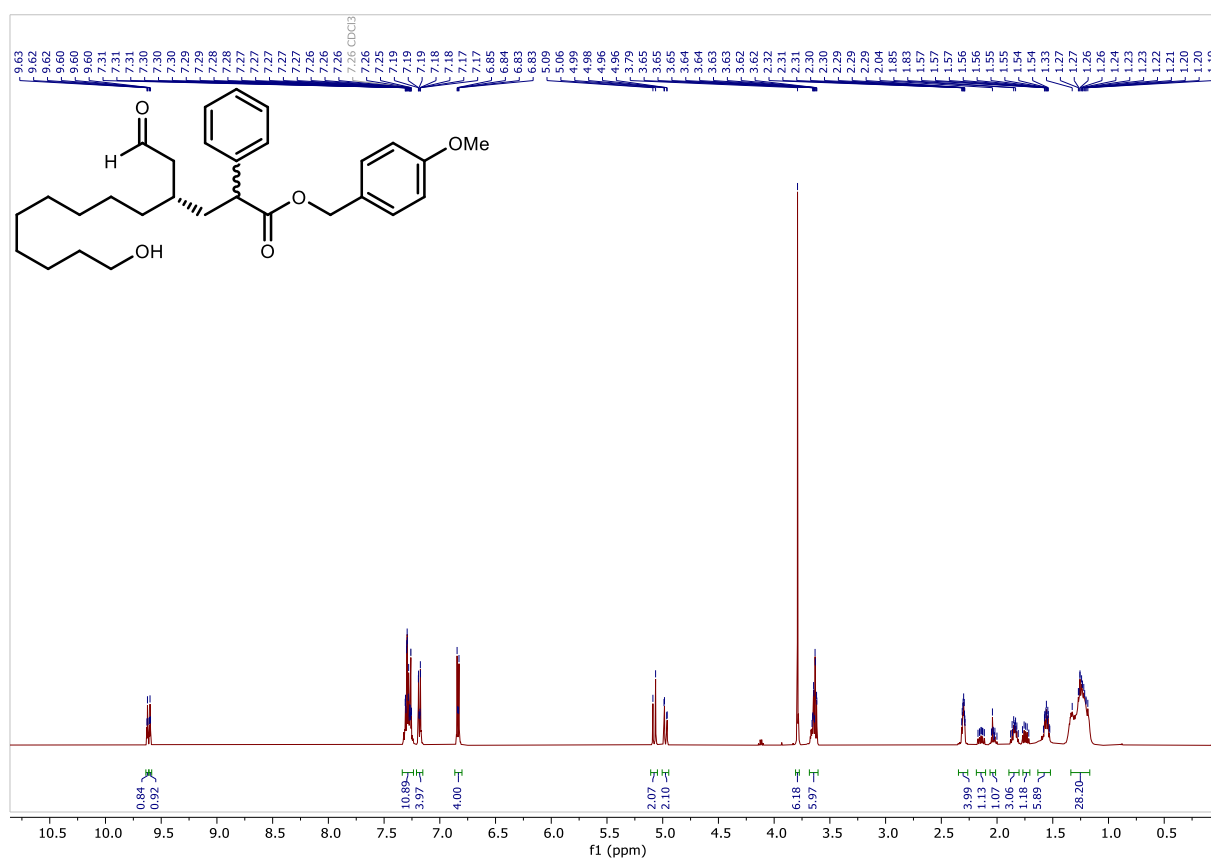

$^{13}\text{C}$  NMR (126 MHz,  $\text{CDCl}_3$ , mixture of diastereoisomers) of **6m**:

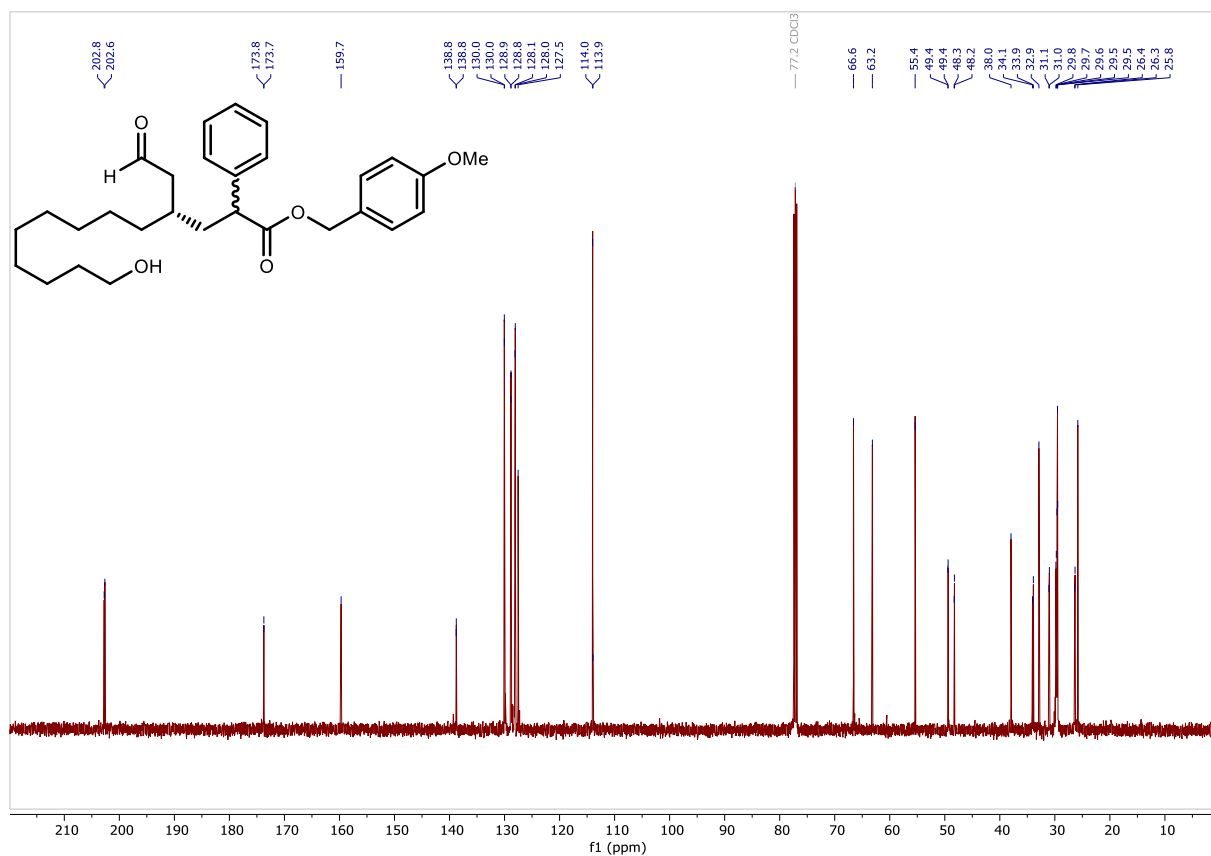

$^1\text{H}$  NMR (400 MHz,  $\text{CDCl}_3$ , mixture of diastereoisomers) of **6n**:

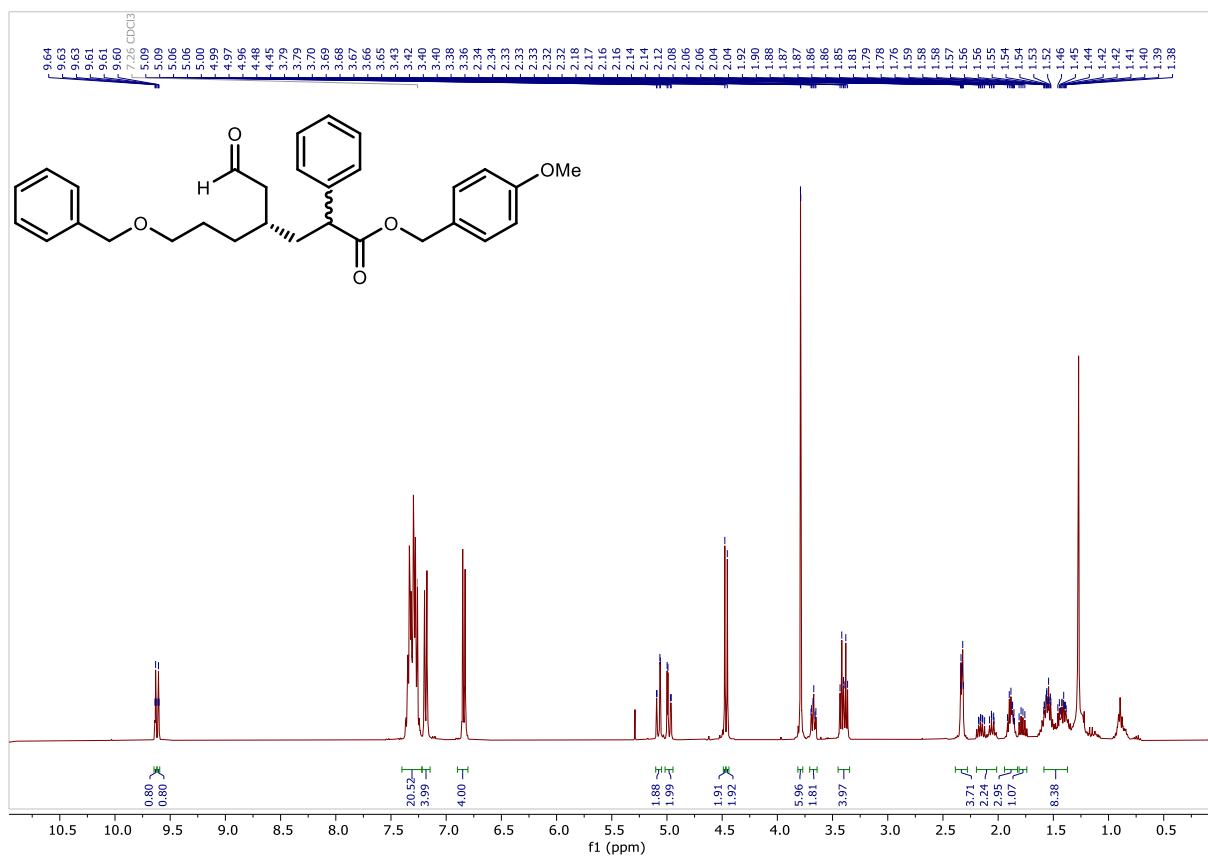

$^{13}\text{C}$  NMR (101 MHz,  $\text{CDCl}_3$ , mixture of diastereoisomers) of **6n**:

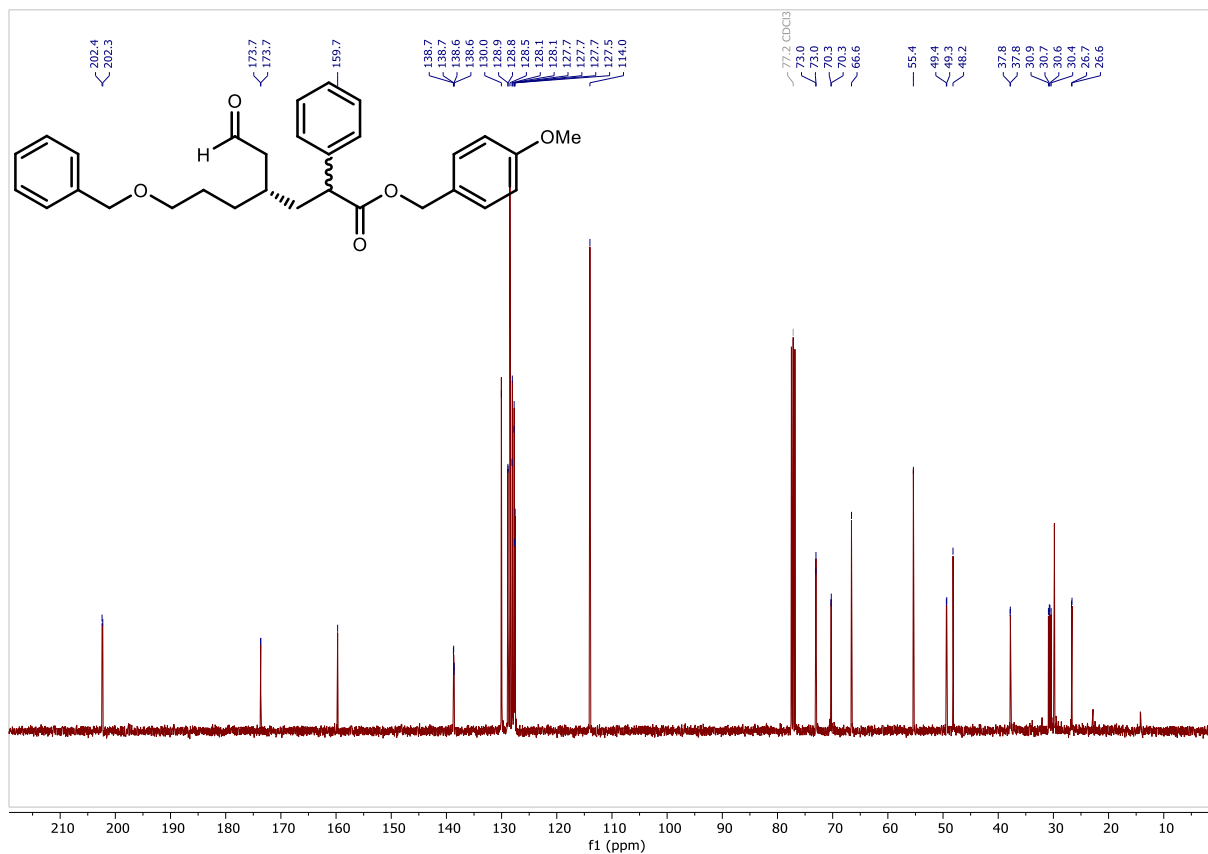



<sup>1</sup>H NMR (500 MHz, CDCl<sub>3</sub>, mixture of diastereoisomers) of **60**:

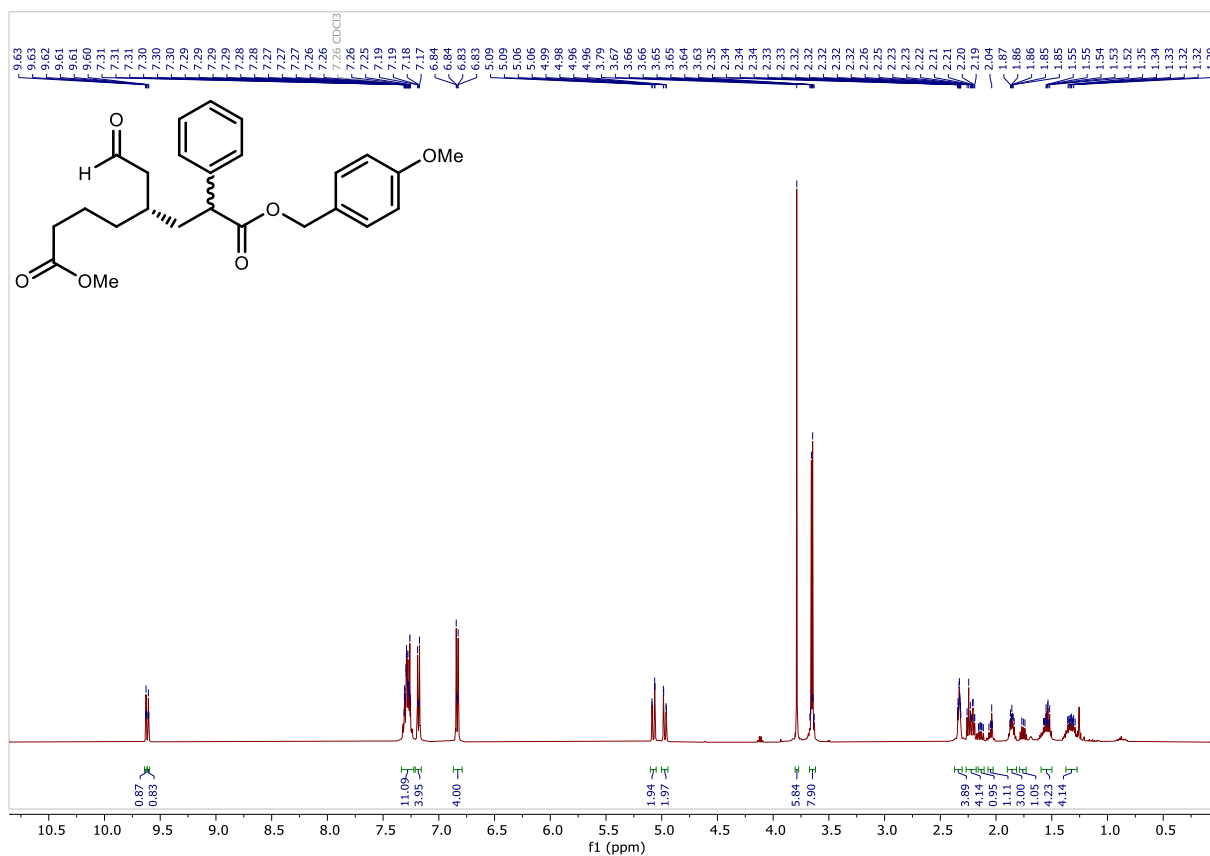

<sup>13</sup>C NMR (126 MHz, CDCl<sub>3</sub>, mixture of diastereoisomers) of **60**:

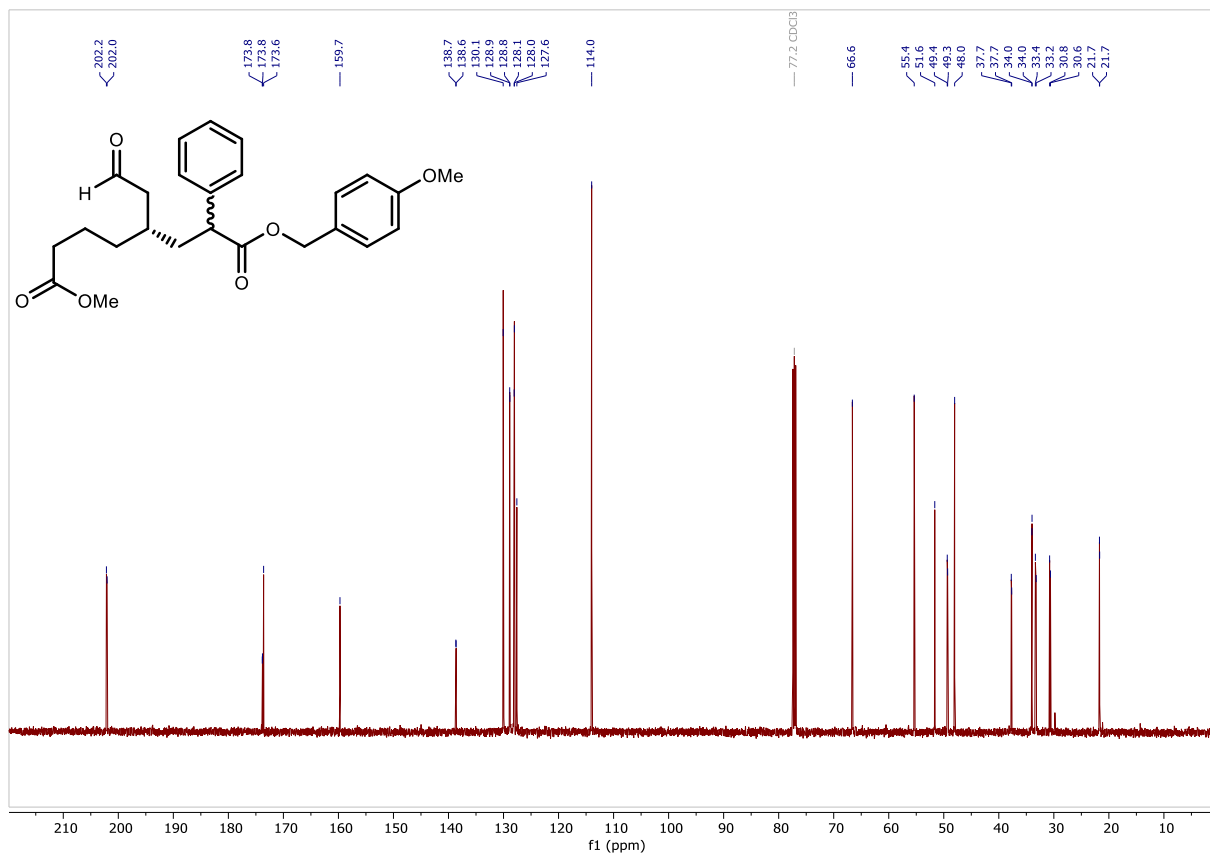

$^1\text{H}$  NMR (500 MHz,  $\text{CDCl}_3$ , mixture of diastereoisomers) of **6r**:

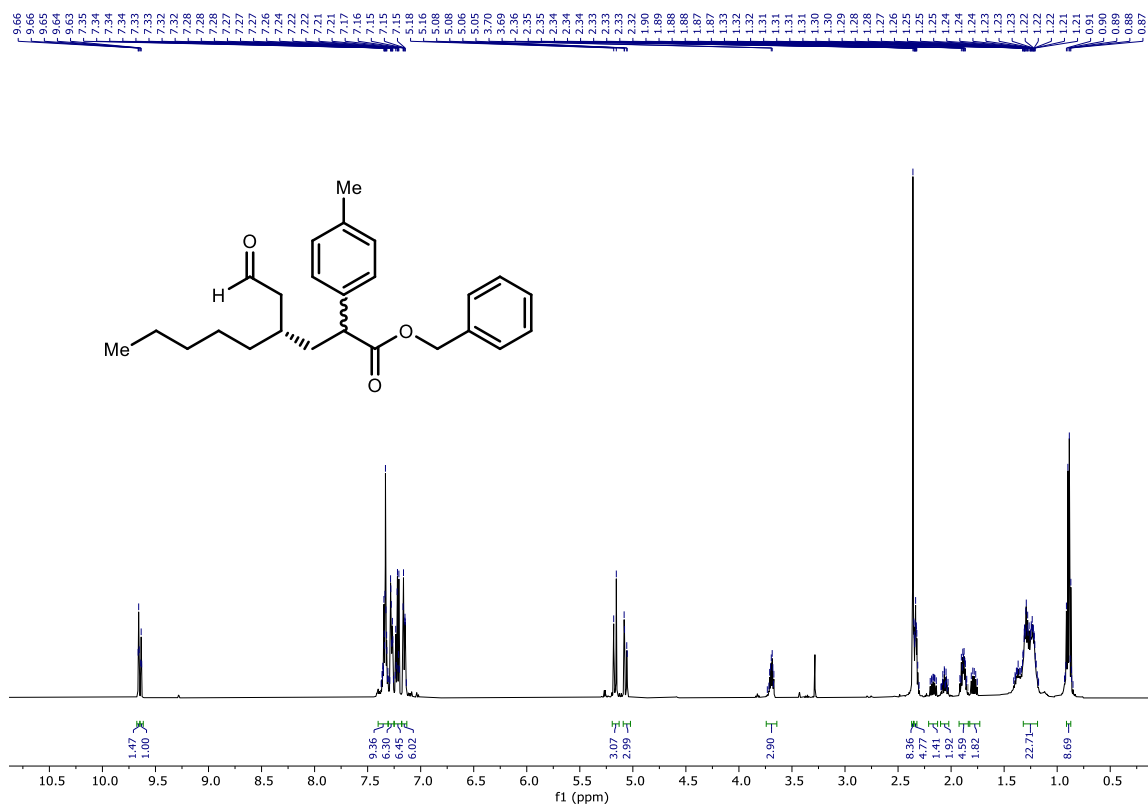

$^{13}\text{C}$  NMR (126 MHz,  $\text{CDCl}_3$ , mixture of diastereoisomers) of **6r**:

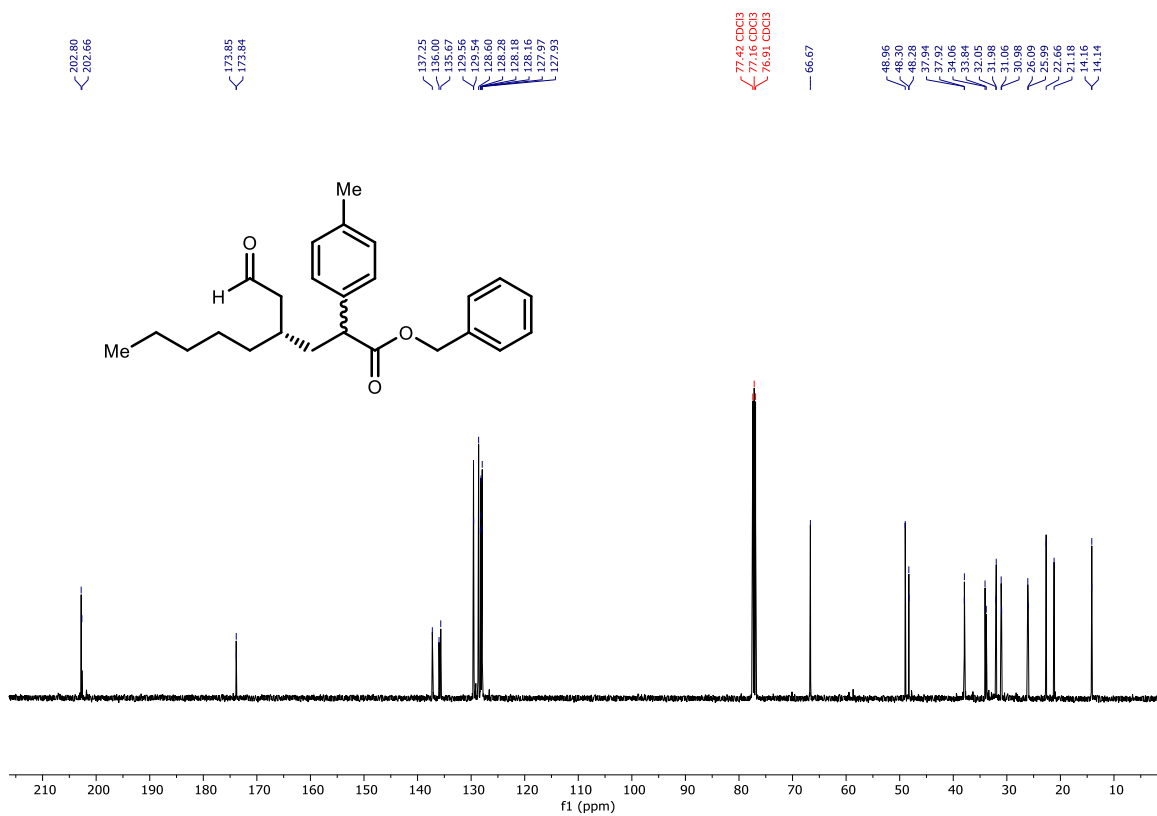

$^1\text{H}$  NMR (500 MHz,  $\text{CDCl}_3$ , mixture of diastereoisomers) of **6s**:

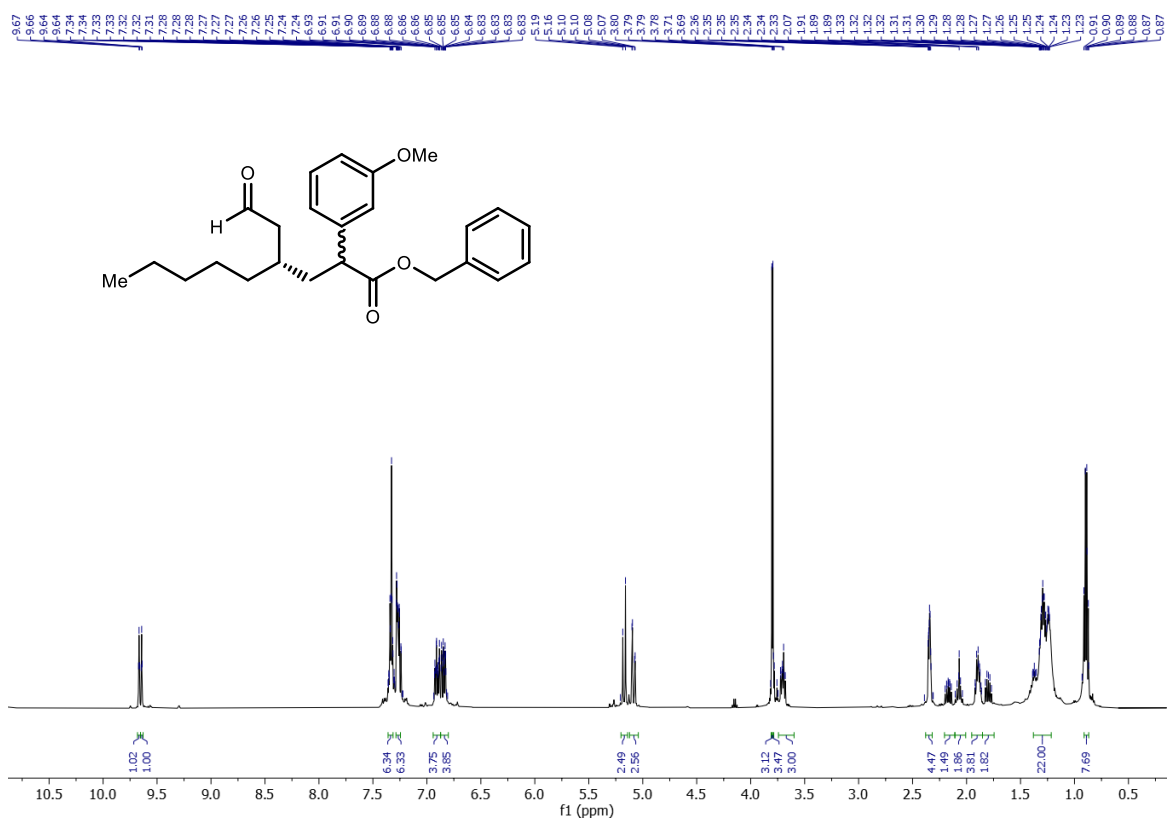

$^{13}\text{C}$  NMR (126 MHz,  $\text{CDCl}_3$ , mixture of diastereoisomers) of **6s**:

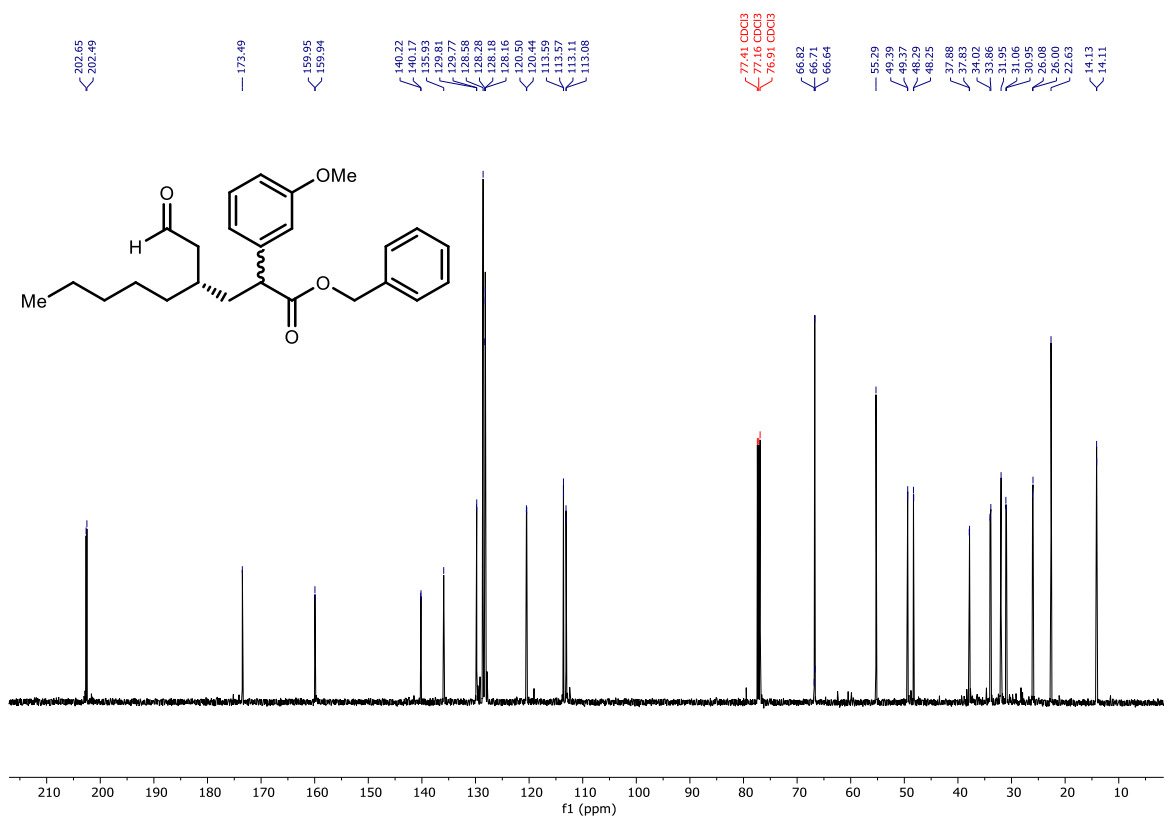

$^1\text{H}$  NMR (500 MHz,  $\text{CDCl}_3$ , mixture of diastereoisomers) of **6t**:

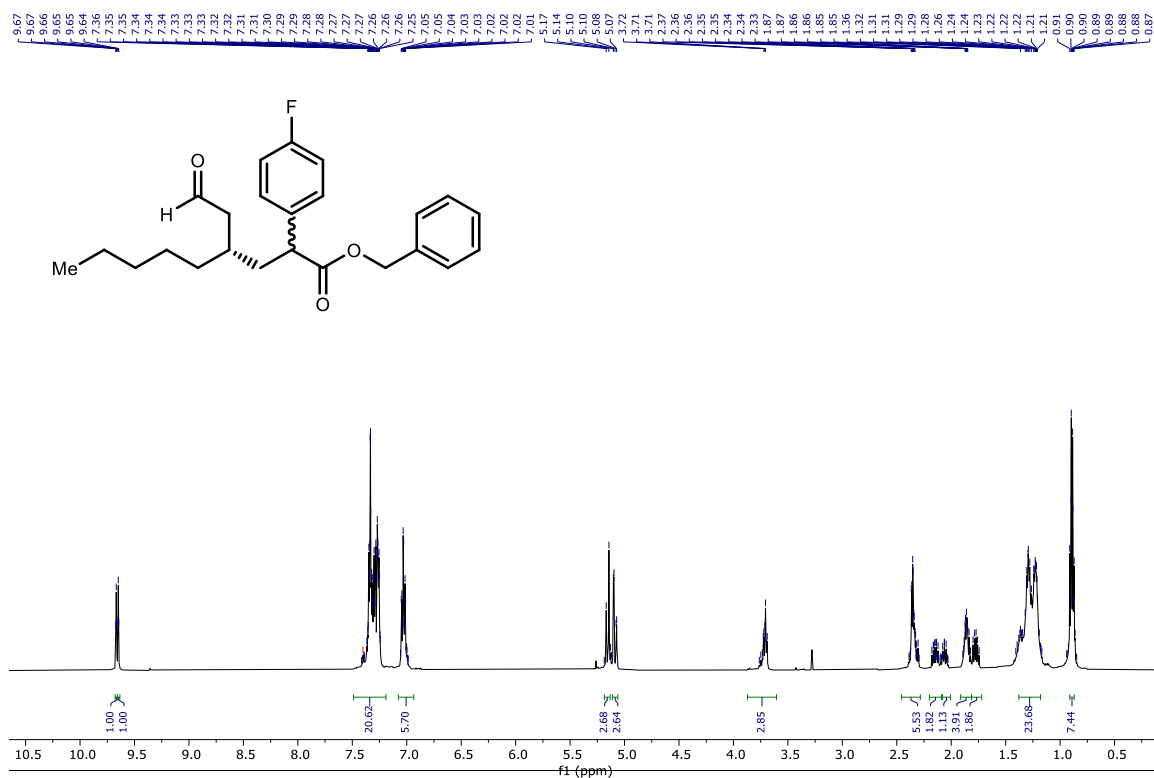

$^{13}\text{C}$  NMR (126 MHz,  $\text{CDCl}_3$ , mixture of diastereoisomers) of **6t**

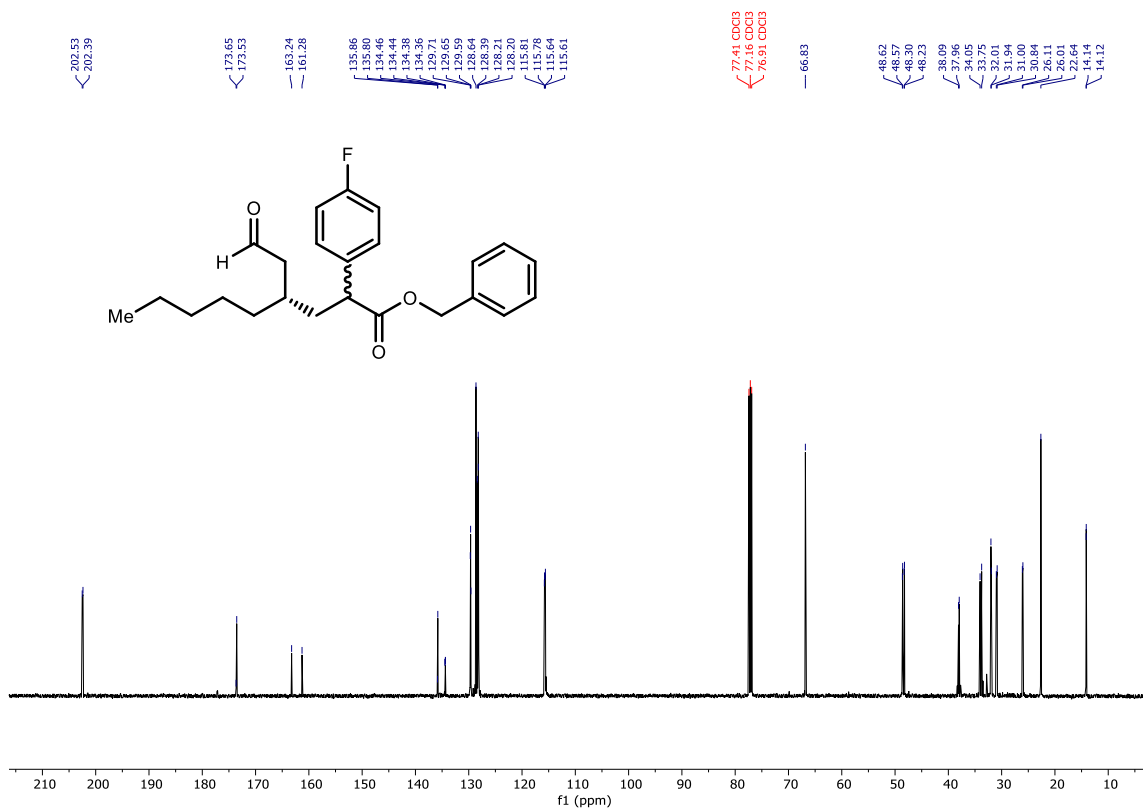

$^{19}\text{F}\{^1\text{H}\}$  NMR (471 MHz,  $\text{CDCl}_3$ , mixture of diastereoisomers) of **6t**:

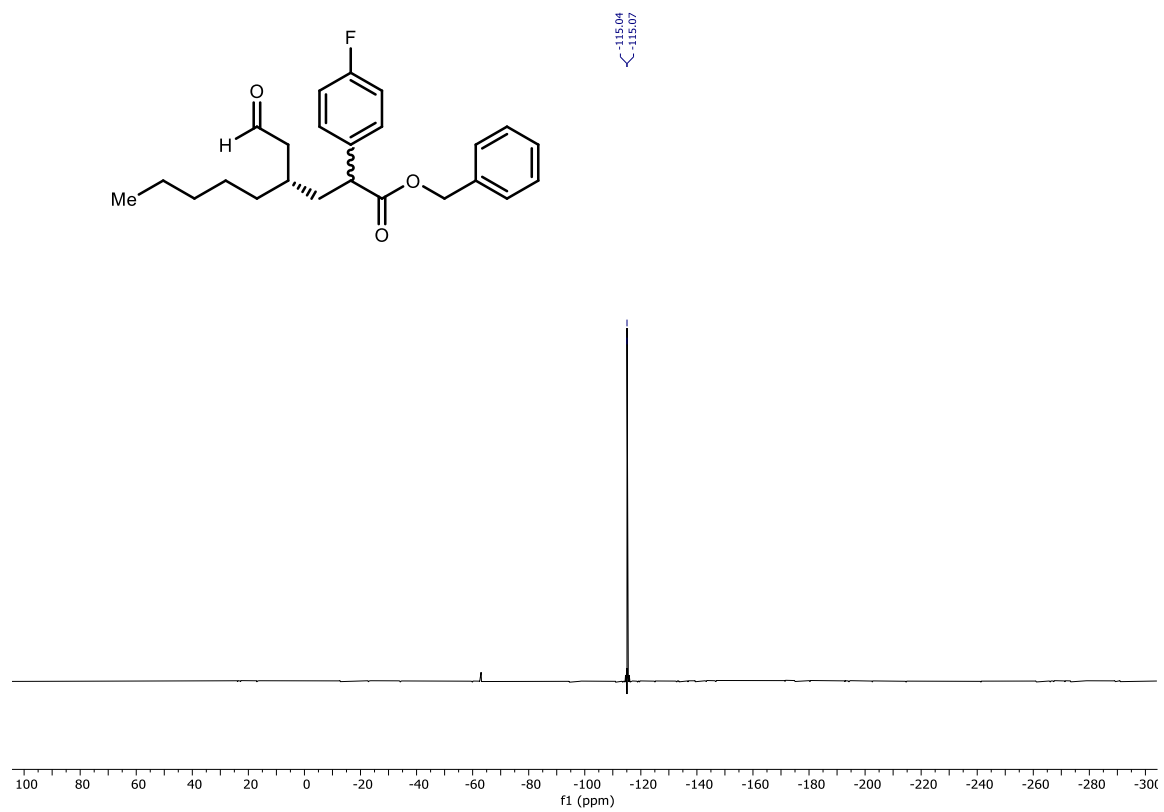

$^1\text{H}$  NMR (400 MHz,  $\text{CDCl}_3$ ) of **7a**:

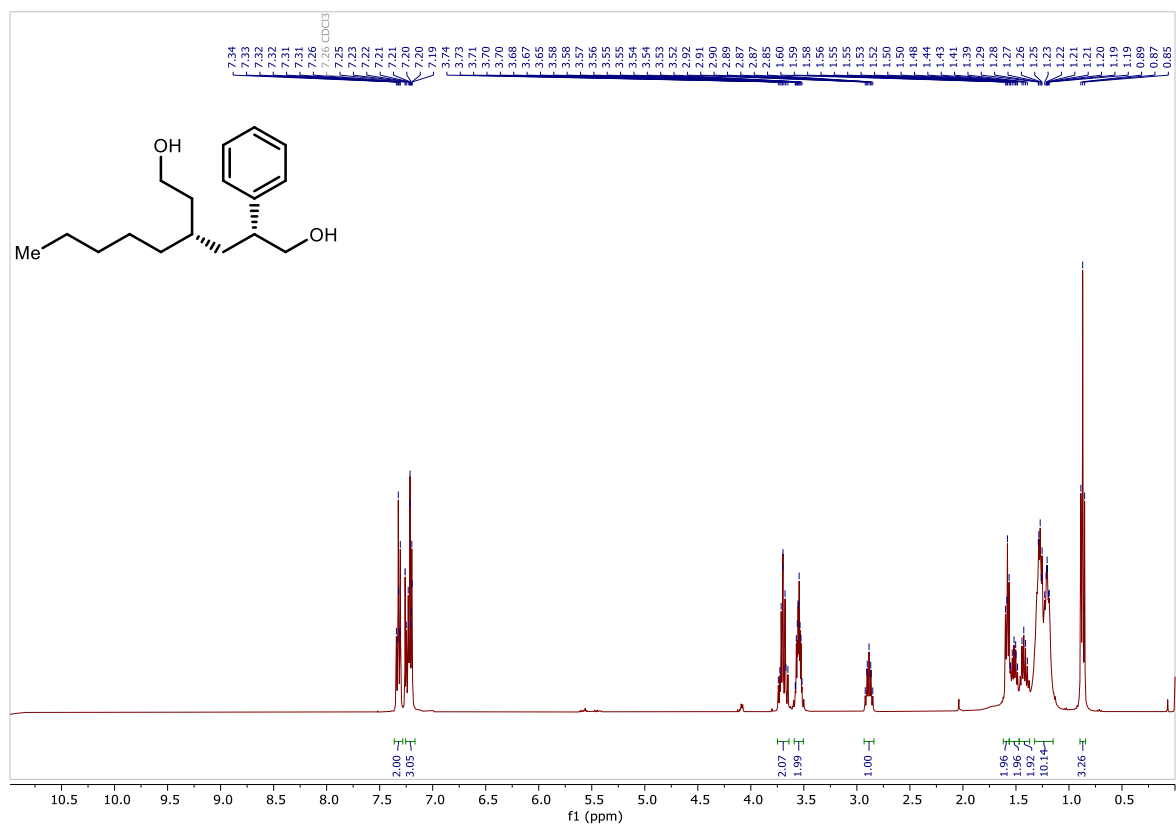

$^{13}\text{C}$  NMR (101 MHz,  $\text{CDCl}_3$ ) of **7a**:

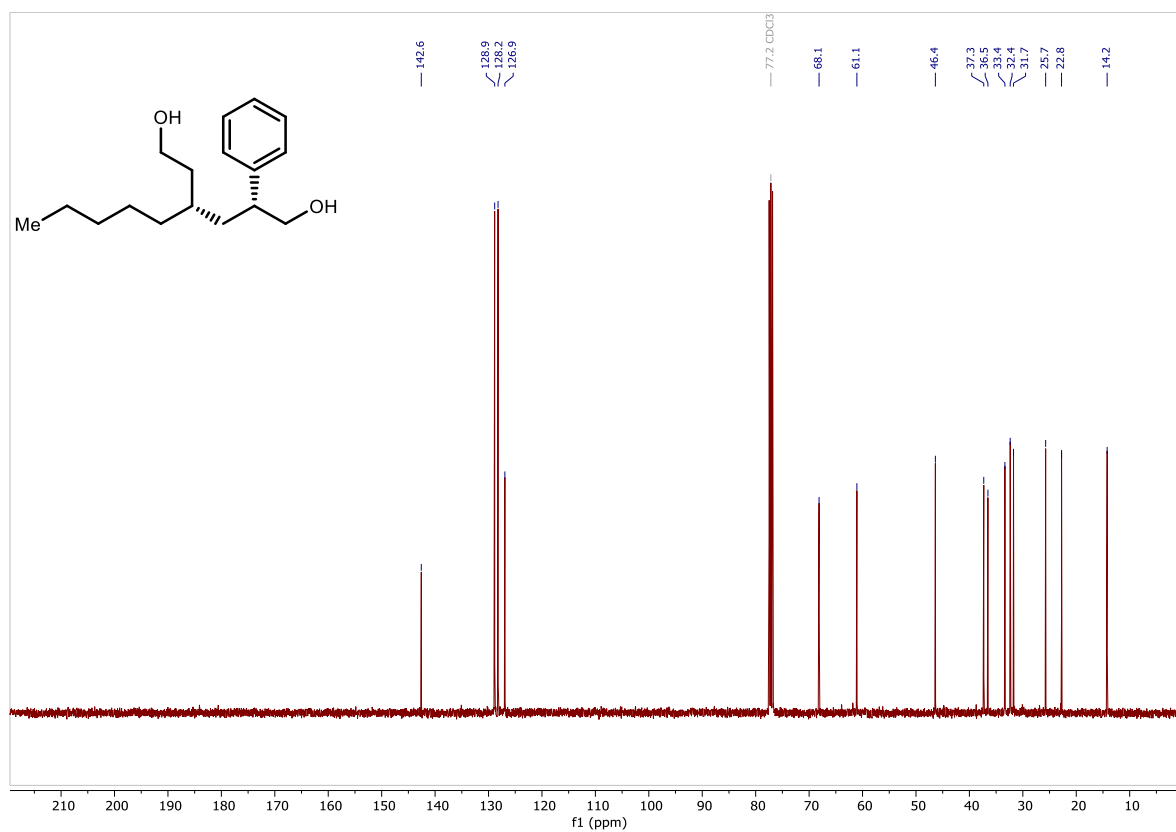

$^1\text{H}$  NMR (400 MHz,  $\text{CDCl}_3$ ) of **7b**:

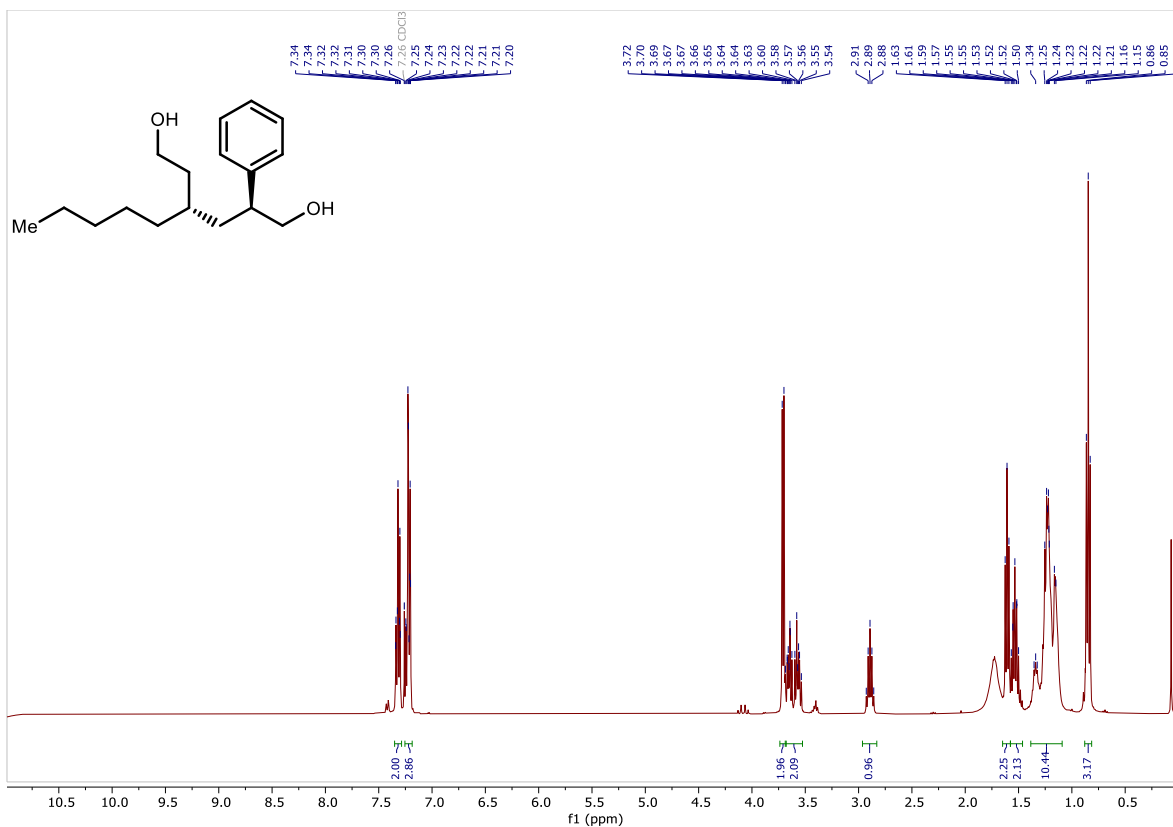

<sup>13</sup>C NMR (101 MHz, CDCl<sub>3</sub>) of **7b**:

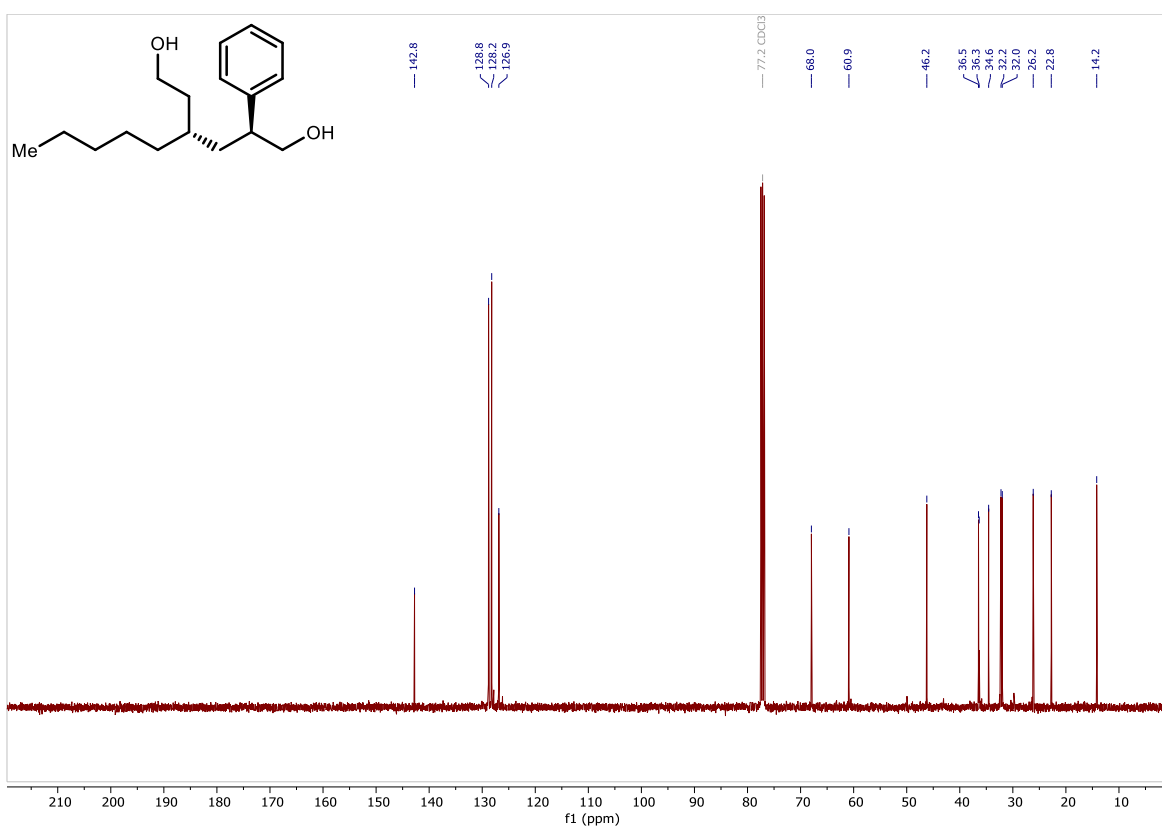

<sup>1</sup>H NMR (500 MHz, CDCl<sub>3</sub>) of **9**:

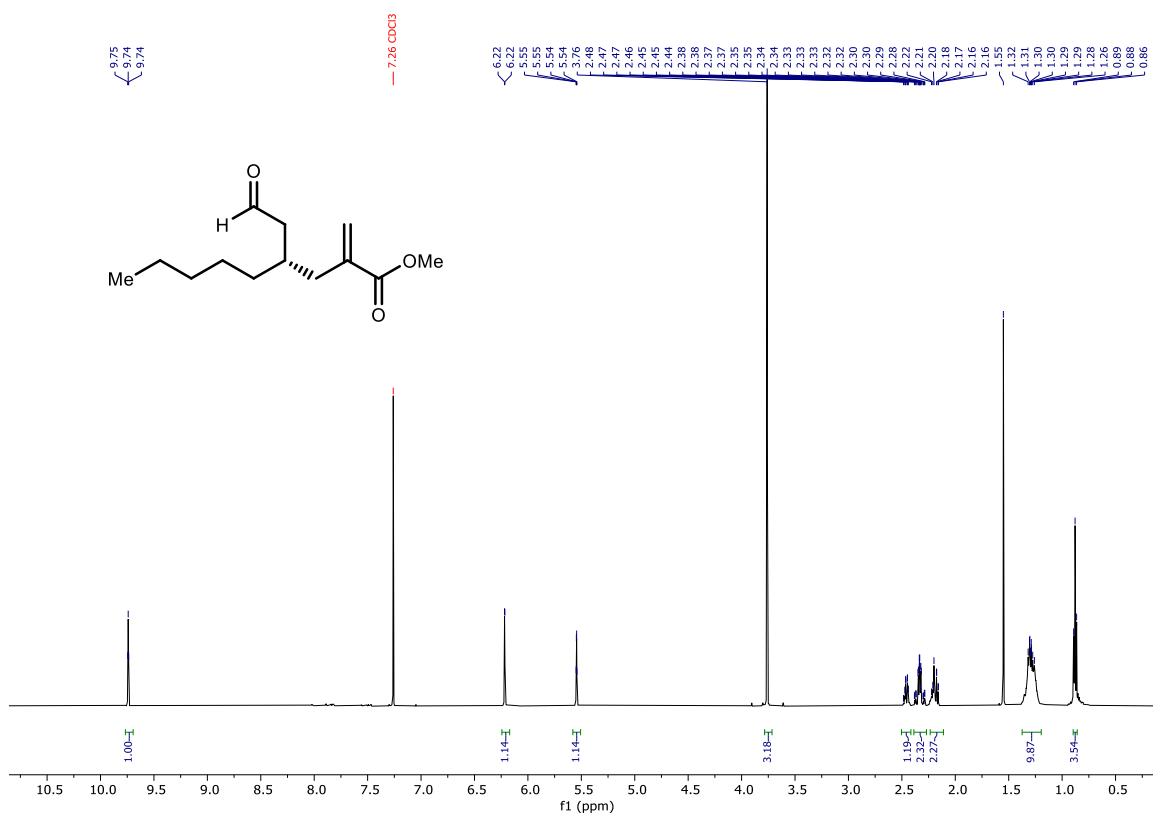

<sup>13</sup>C NMR (126 MHz, CDCl<sub>3</sub>) of **9**:

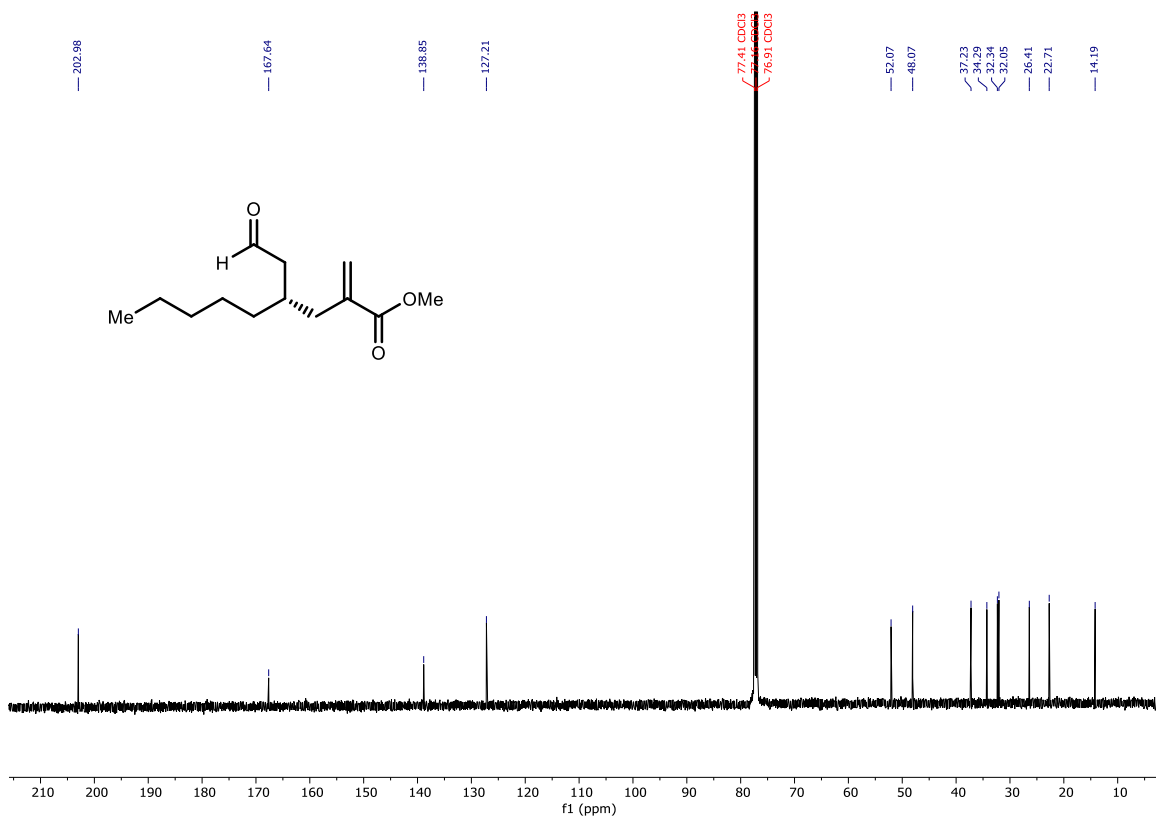



<sup>1</sup>H NMR (500 MHz, CDCl<sub>3</sub>) of **11**:

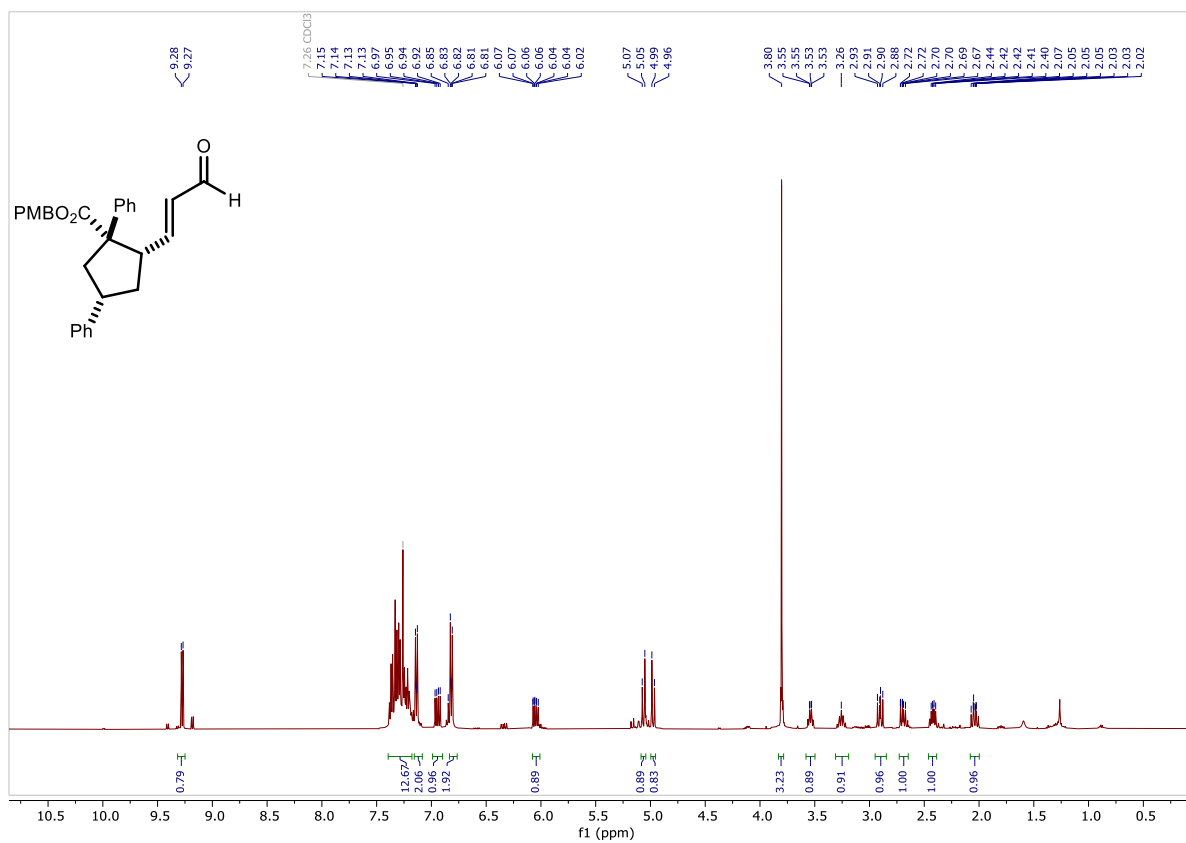

<sup>13</sup>C NMR (126 MHz, CDCl<sub>3</sub>) of **11**:

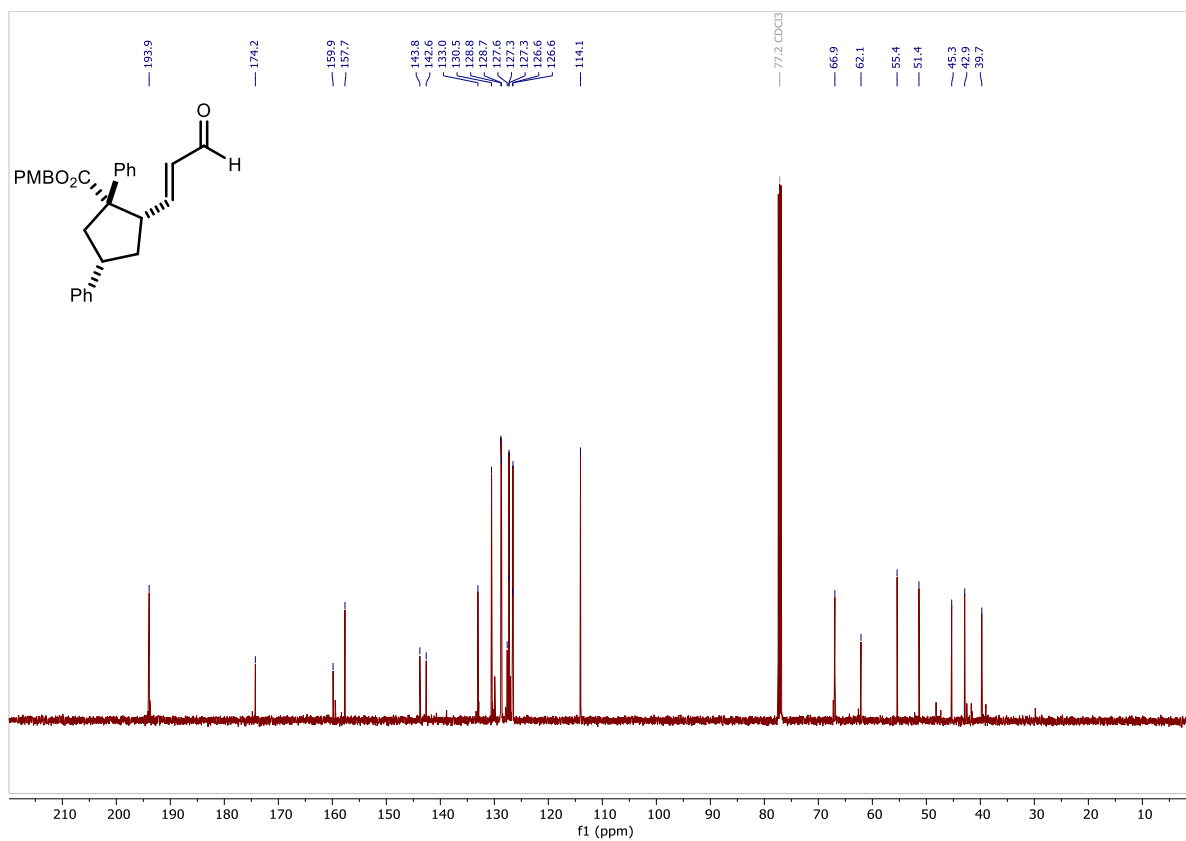

## Radical Clock Experiment

### 4-Methoxybenzyl (*E*)-2-(3-oxoprop-1-en-1-yl)-1,4-diphenylcyclopentane-1-carboxylate (**11**)

Following the general procedure **E** using acrylate **5a** (250  $\mu$ mol, 67.0 mg) and enal **10** (750  $\mu$ mol, 129 mg), purification of the crude product by flash column chromatography (silica gel, 5-8% EtOAc in hexanes) afforded product **11** as a pale yellow oil (39.0 mg, 35% yield) in a 16.5:2.5:1:1 diastereomeric ratio.

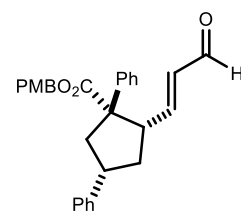

Chemical Formula: C<sub>29</sub>H<sub>28</sub>O<sub>4</sub>  
Molecular Weight: 440.54

*NMR peaks of major diastereomer only:*

**<sup>1</sup>H NMR (500 MHz, CDCl<sub>3</sub>):**  $\delta$  = 9.28 (d,  $J$  = 7.9 Hz, 1H, H1), 7.40 – 7.19 (m, 10H, H9-H16), 7.16 – 7.08 (m, 2H, H20), 6.94 (dd,  $J$  = 15.6, 7.8 Hz, 1H, H3), 6.84 – 6.76 (m, 2H, H21), 6.05 (ddd,  $J$  = 15.6, 7.9, 1.2 Hz, 1H, H2), 5.06 (d,  $J$  = 11.9 Hz, 1H, H18a), 4.98 (d,  $J$  = 11.9 Hz, 1H, H18b), 3.80 (s, 3H, H23), 3.58 – 3.50 (m, 1H, H4), 3.31 – 3.19 (m, 1H, H7), 2.90 (dd,  $J$  = 13.9, 10.3 Hz, 1H, H6a), 2.70 (dd,  $J$  = 14.6, 8.8 Hz, 1H, H6b), 2.46 – 2.39 (m, 1H, H8a), 2.08 – 2.00 (m, 1H, H8b) ppm. **<sup>13</sup>C NMR (126 MHz, CDCl<sub>3</sub>):**  $\delta$  = 193.9 (C1), 174.3 (C17), 159.9 (C22), 157.7 (C3), 143.8 (C9), 142.6 (C13), 133.0 (C2), 130.5 (C20), 128.8 (C<sub>arom</sub>), 128.7 (C<sub>arom</sub>), 127.6 (C<sub>arom</sub>), 127.3 (C<sub>arom</sub>), 127.3 (C<sub>arom</sub>), 126.6 (C<sub>arom</sub>), 126.6 (C<sub>arom</sub>), 114.1 (C21), 66.9 (C18), 62.1 (C5), 55.4 (C23), 51.4 (C4), 45.3 (C6), 42.9 (C7), 39.7 (C8) ppm.

**HRMS (ESI):**  $m/z$  calculated for [C<sub>29</sub>H<sub>28</sub>O<sub>4</sub>Na]<sup>+</sup> [M+Na]<sup>+</sup>: 463.1880; found: 463.1877.

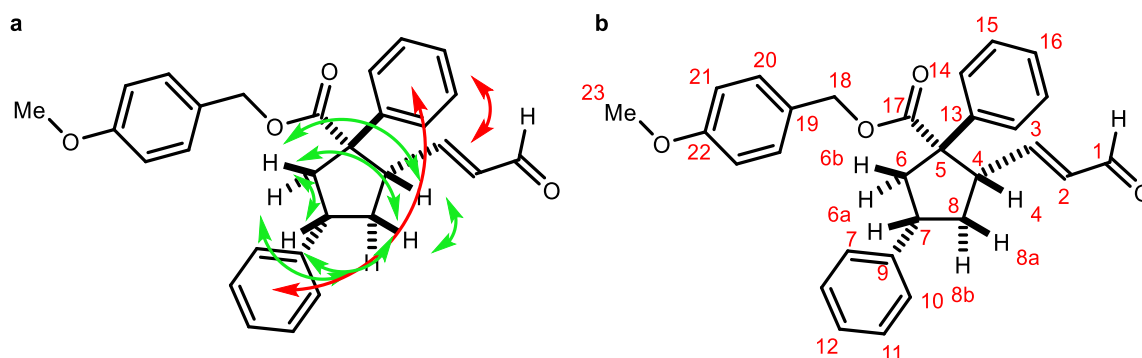

**Supplementary Figure 69:** Cross peaks (NOESY) (a) and numbering (b) for product **11**, which established the relative configuration of the major diastereomer; green: NOE signals; red: no NOE signals

## Cyclic Voltammetric Studies

The following section details the cyclic voltammograms of the substrates (**TsCN** and **5a**) and the reductant (**R-1**) used in this study.

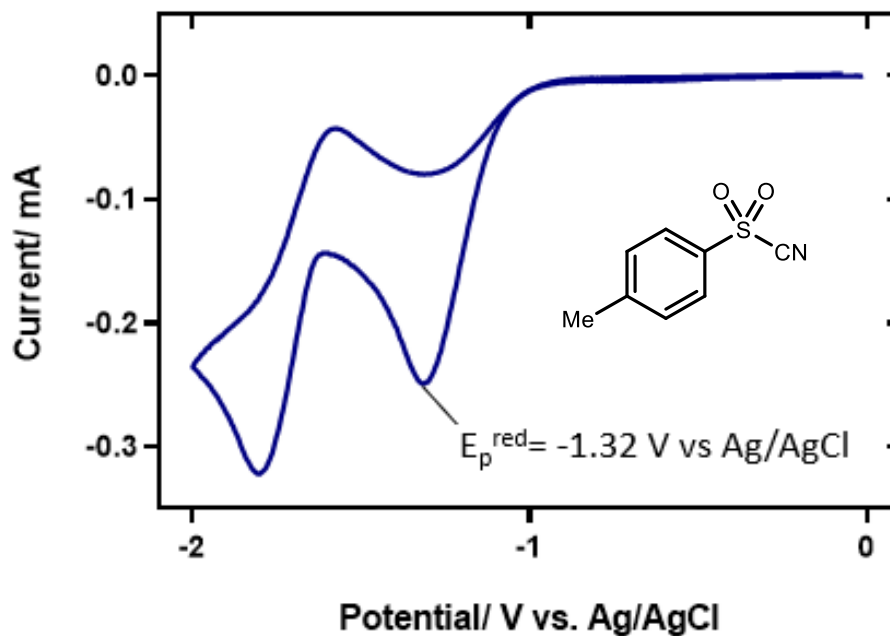

**Supplementary Figure 70:** Cyclic voltammogram of **TsCN** (5 mM) in 0.1 M [NBu<sub>4</sub>PF<sub>6</sub>] in MeCN. Sweep rate: 100 mV/s. Working electrode: Glassy carbon; reference electrode: Ag/AgCl (KCl sat.); Auxiliary electrode: Pt. Irreversible reduction.  $E_p^A = E_p^{\text{red}}$  (TsCN<sup>•-</sup>/TsCN) = -1.32 V;  $E_p^A$  is the cathodic peak potential, while  $E_p^{\text{red}}$  value describes the electrochemical properties of TsCN.

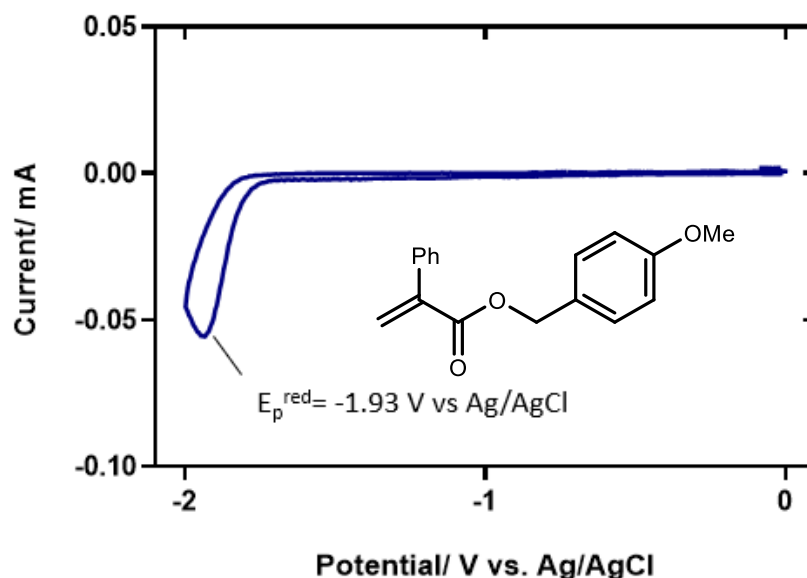

**Supplementary Figure 71:** Cyclic voltammogram of acrylate **5a** (1 mM) in 0.1 M [NBu<sub>4</sub>PF<sub>6</sub>] in MeCN. Sweep rate: 100 mV/s. Working electrode: Glassy carbon; reference electrode: Ag/AgCl (KCl sat.); Auxiliary electrode: Pt. Irreversible reduction.  $E_p^A = E_p^{\text{red}}$  (**5a**<sup>•-</sup>/**5a**) = -1.93 V;  $E_p^A$  is the cathodic peak potential, while  $E_p^{\text{red}}$  value describes the electrochemical properties of **5a**.

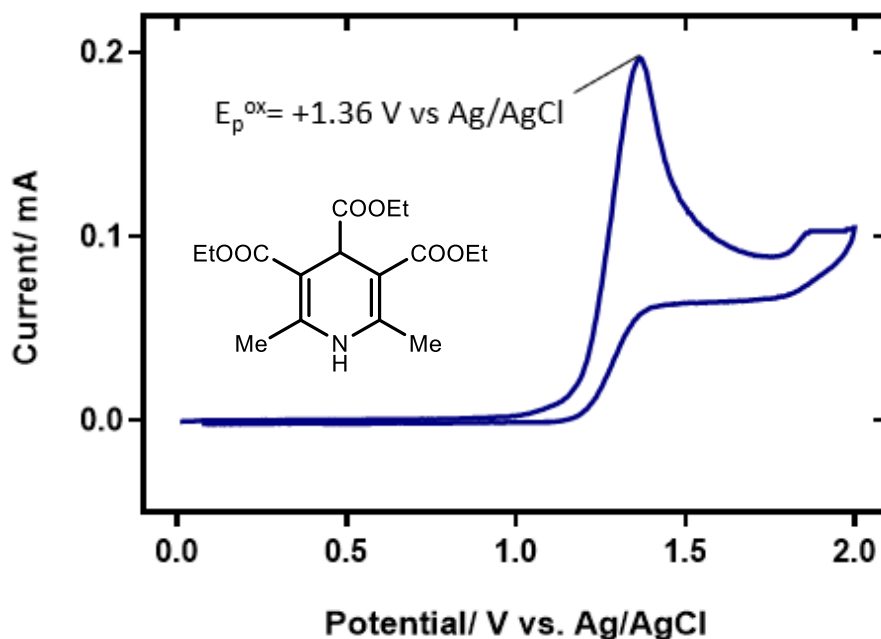

**Supplementary Figure 72:** Cyclic voltammogram of dihydropyridine **R-1** (5 mM) in 0.1 M [NBu<sub>4</sub>PF<sub>6</sub>] in MeCN. Sweep rate: 100 mV/s. Working electrode: Glassy carbon; reference electrode: Ag/AgCl (KCl sat.); Auxiliary electrode: Pt. Irreversible oxidation.  $E_p^A = E_p^{ox}(\mathbf{R-1}^{+/} / \mathbf{R-1}) = +1.36$  V;  $E_p^A$  is the anodic peak potential, while  $E_p^{ox}$  value describes the electrochemical properties of **R-1**.

## UV-Vis Spectroscopic Studies

The following section reports the UV/Vis spectra of substrates and reductant **R-1** used in this study. None of the substrates (alone or as mixture) can absorb significantly at 460 nm. The best absorbing species is the photoredox catalyst 4-CzIPN.

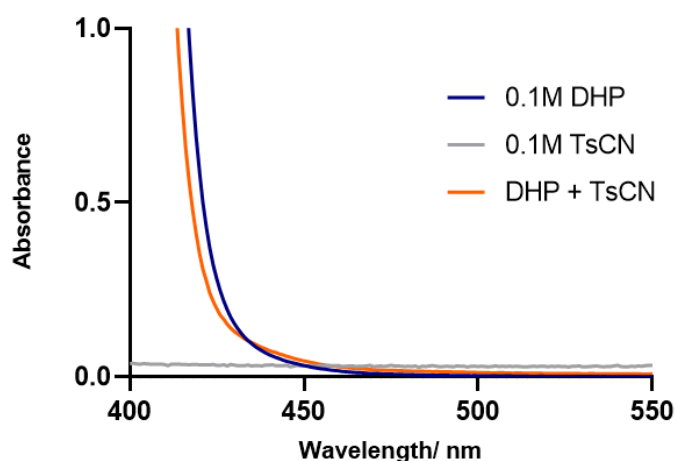

**Supplementary Figure 73:** UV-Vis absorption spectra, recorded in DME in 1 cm path quartz cuvettes using an Agilent Cary 60 spectrophotometer. DHP [**R-1**] = 0.10 M, [**TsCN**] = 0.10 M.

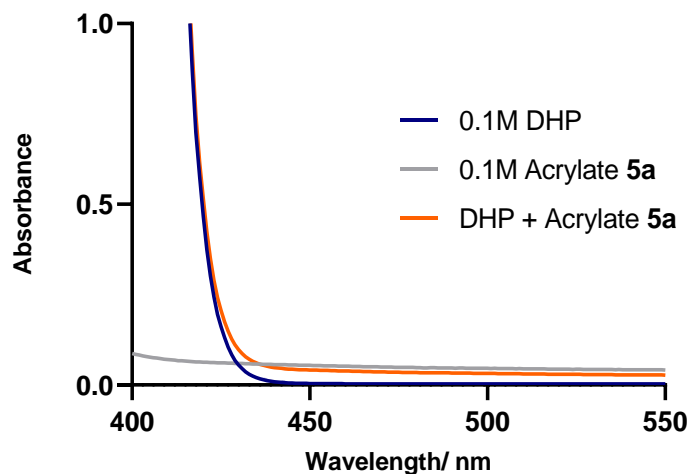

**Supplementary Figure 74:** UV-Vis absorption spectra, recorded in DME in 1 cm path quartz cuvettes using an Agilent Cary 60 spectrophotometer. DHP [**R-1**] = 0.10 M, [**5a**] = 0.10 M.

### Stern-Volmer Quenching Studies

To evaluate the feasibility of the proposed reductive quenching of the excited photocatalyst **4-CzPIN** ( $E_{1/2}(\text{PC}^*/\text{PC}^+) = +1.35$  V vs SCE) by dihydropyridine **R-1** ( $E^{\text{ox}} = +1.36$  V vs. Ag/AgCl), we conducted Stern Volmer studies, which confirmed this mechanistic scenario. The emission spectra were recorded in a Fluorolog Horiba Jobin Yvon spectrofluorimeter equipped with a photomultiplier detector, a double monochromator, and a 450W xenon light source. 2.5 mL of HPLC grade DME, thoroughly degassed by freeze-pump-thaw, were placed in a 10 x 10 mm light path quartz fluorescence cuvette equipped with Silicone/PTFE 3.2 mm septum under an argon atmosphere. Then, 25  $\mu\text{L}$  of a 1.5 mM solution of photocatalyst 4-CzIPN in DME was added to give a final concentration of 15  $\mu\text{M}$ . To measure the emission spectrum, the excitation wavelength was fixed at 460 nm (incident light slit regulated to 3 nm).

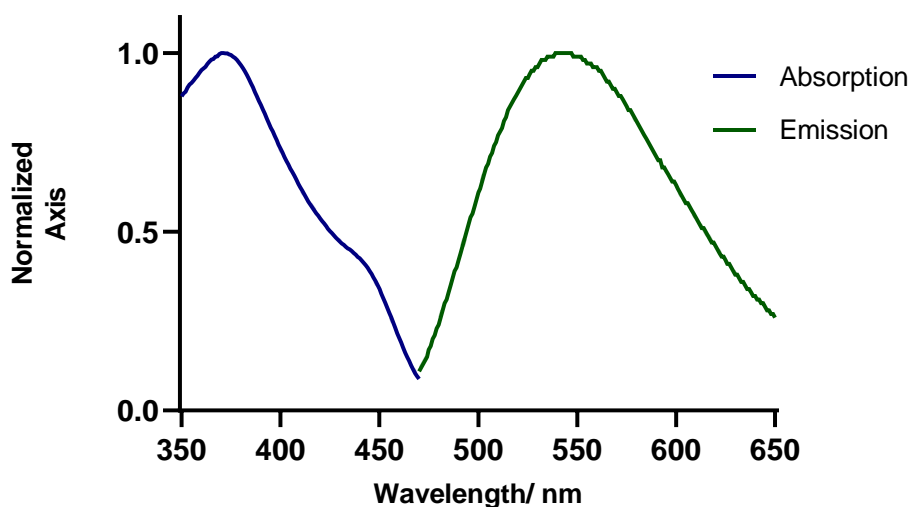

**Supplementary Figure 75:** Absorption and emission spectra of photocatalyst 4-CzIPN

### Stern-Volmer quenching studies with dihydropyridine **R-1**

A 0.25 M solution of dihydropyridine **R-1** in DME was prepared, and 20  $\mu\text{L}$  of this stock solution was added to the solution of photocatalyst 4-CzIPN, prepared as described above. The addition of **R-1** solution was repeated four consecutive times. After each addition, the solution was sparged with argon for 20 s. An absorption spectrum and an emission spectrum of the solution were then recorded. The excitation wavelength was fixed at 460 nm (incident light slit regulated to 3 nm); the emission light was acquired from 470 nm to 650 nm (emission light slit regulated to 3 nm). A solvent blank was subtracted from all the measurements. The excitation wavelength was chosen in order to avoid saturation of the emission detector. The results shown in **Supplementary Figure 76** indicate that **R-1** quenches the excited state of 4-CzIPN and its emission. No change in the relevant region of absorption spectra were observed during the addition of **R-1** (**Supplementary Figure 77**).

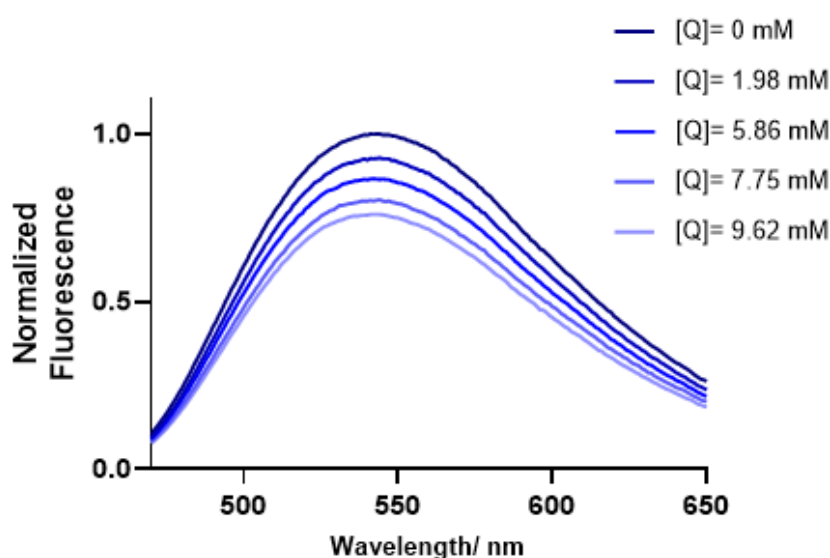

**Supplementary Figure 76:** Emission of the photocatalyst 4-CzIPN (15  $\mu\text{M}$  in DME) in the presence of increasing amounts of dihydropyridine **R-1** [Q].

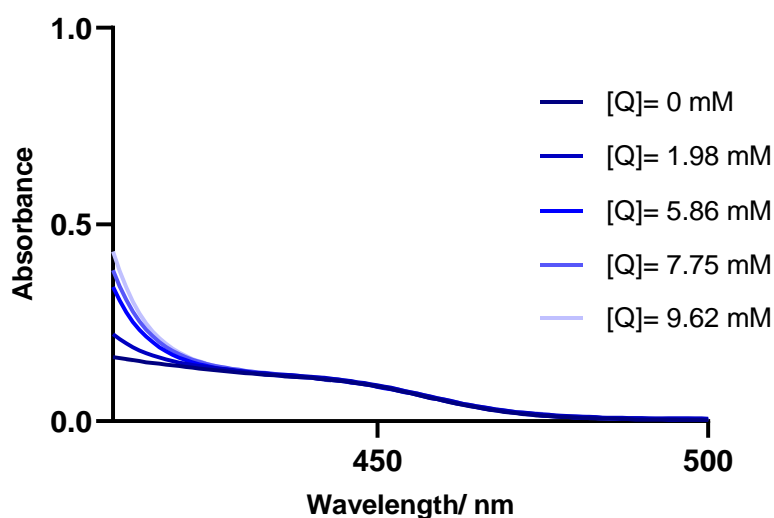

**Supplementary Figure 77:** UV-vis absorption spectra of 4-CzIPN (15  $\mu\text{M}$  in DME) in the presence of increasing amounts of dihydropyridine **R-1** [Q].

The Stern-Volmer plot (**Supplementary Figure 78**), derived from the normalized emission intensity at 530 nm, shows a linear correlation between the amounts of **R-1** and the ratio  $I^0/I$ . Based on the following Equation 1, we calculated the Stern-Volmer constant  $K_{SV}$  as  $30.5 \text{ M}^{-1}$ .

$$\frac{I^0}{I} = 1 + K_{SV}[Q] \quad (1)$$

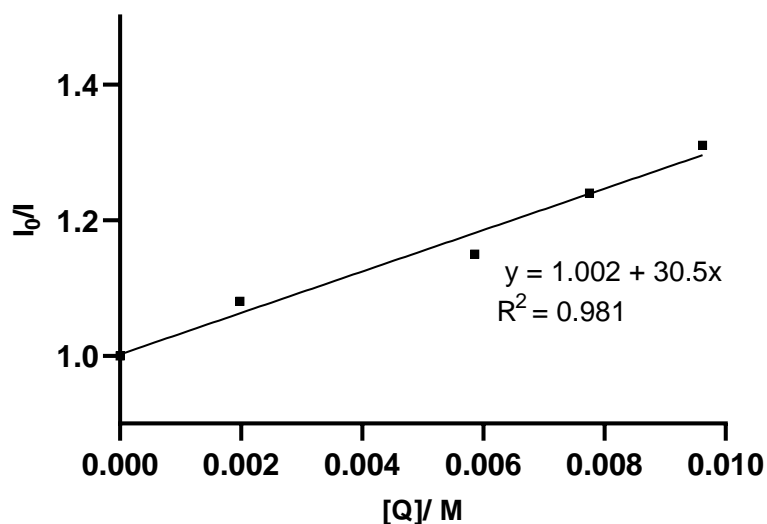

**Supplementary Figure 78:** Stern-Volmer quenching plot using **R-1** as the quencher.

#### Stern-Volmer quenching studies with TsCN

A 1.00 M solution of TsCN in DME was prepared, and 20  $\mu\text{L}$  was added to the solution of photocatalyst 4-CzIPN, prepared as described above. The addition of TsCN solution was repeated three consecutive times. After each addition, the solution was sparged with argon for 20 s. An absorption spectrum and an emission spectrum of the solution were then recorded. The excitation wavelength was fixed at 460 nm (incident light slit regulated to 3 nm); the emission light was acquired from 470 nm to 650 nm (emission light slit regulated to 3 nm). A solvent blank was subtracted from all the measurements. The excitation wavelength was chosen in order to avoid saturation of the emission detector. The results shown in **Supplementary Figure 79** indicate that TsCN does not quench the excited state of 4-CzIPN and its emission significantly. No change in the relevant region of absorption spectra were observed during the addition of TsCN (**Supplementary Figure 80**).

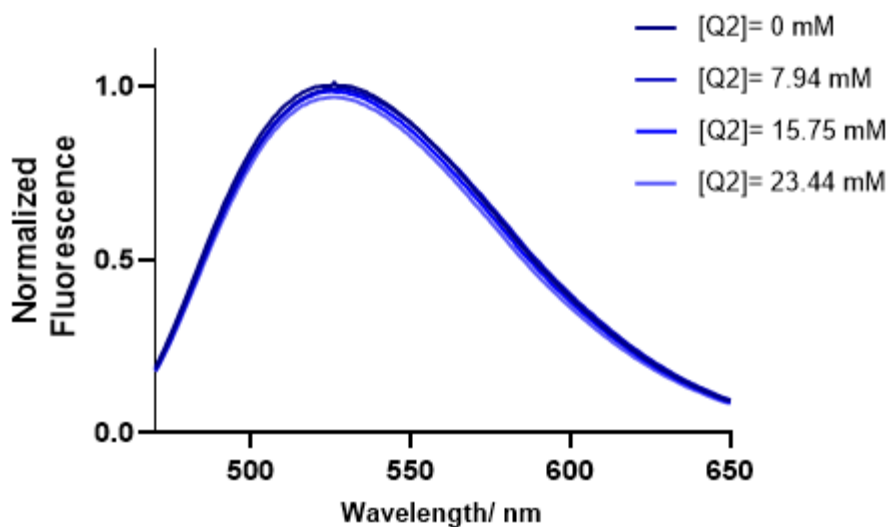

**Supplementary Figure 79:** Emission of the photocatalyst 4-CzIPN (15 μM in DME) in the presence of increasing amounts of TsCN [Q2].

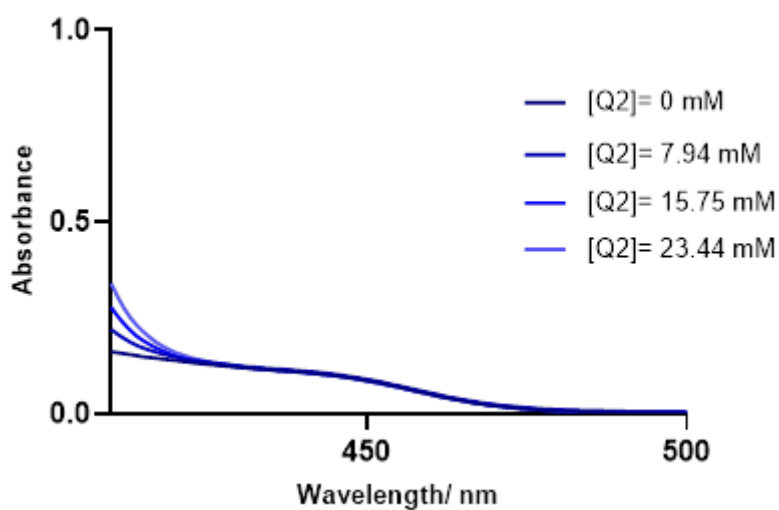

**Supplementary Figure 80:** UV-Vis absorption spectra of 4-CzIPN (15 μM in DME) in the presence of increasing amounts of TsCN [Q2].

The Stern-Volmer plot (**Supplementary Figure 81**), derived from the normalized emission intensity at 530 nm, shows a linear correlation between the amounts of TsCN and the ratio  $I^0/I$ . Based on equation 1, we calculated the Stern-Volmer constant  $K_{SV-2}^{31}$  as  $1.7 \text{ M}^{-1}$ .



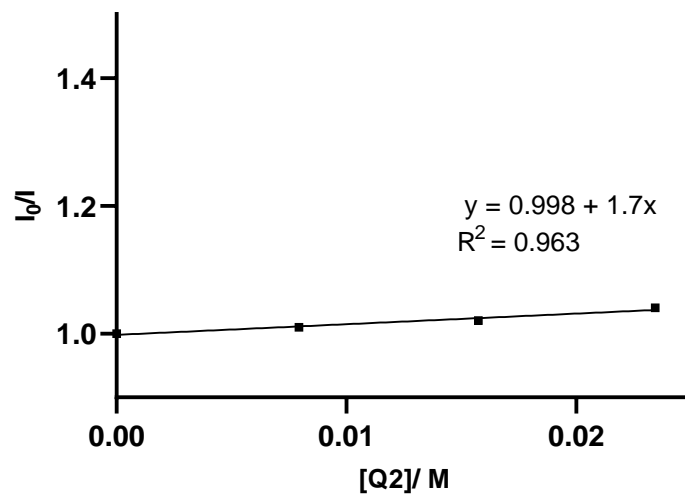

**Supplementary Figure 81:** Stern-Volmer quenching plot using TsCN as the quencher.

## Proposed Catalytic Cycle for the Cross Electrophile Coupling

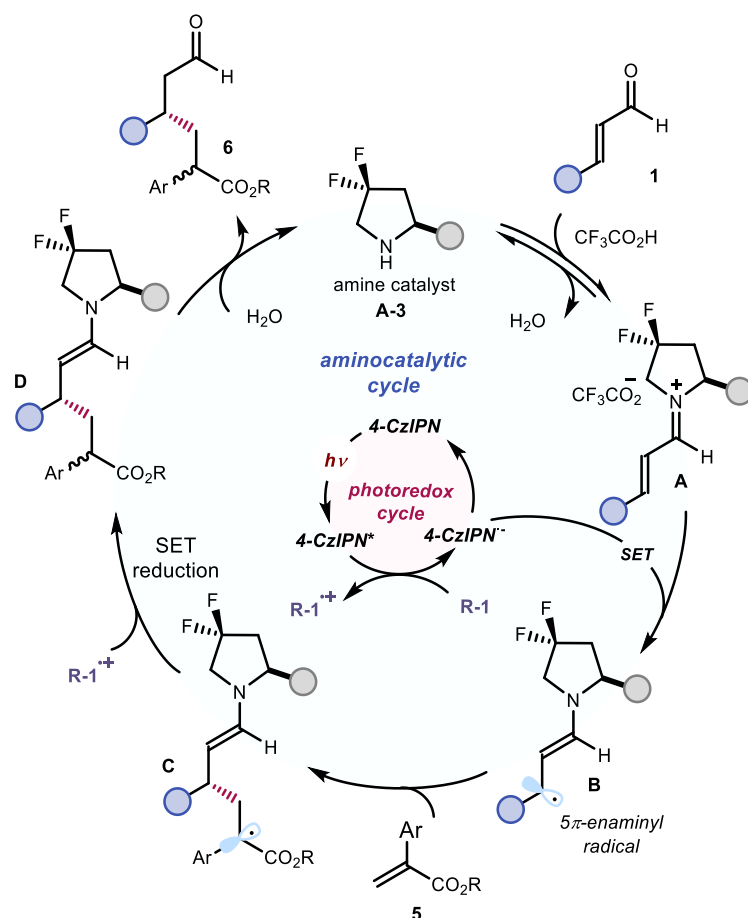

**Supplementary Figure 82:** Proposed mechanism for the cross electrophile coupling of enals **1** with acrylates **5** by merging the action of photocatalyst 4-CzIPN and chiral amine catalyst **A-3**.

## Quantum Yield Determination

In order to confirm the proposed reaction mechanism for the cross-electrophile coupling proposed in **Supplementary Figure 82**, a quantum yield measurement was conducted on the reaction of **1a** and **5a** (**Supplementary Figure 83**).

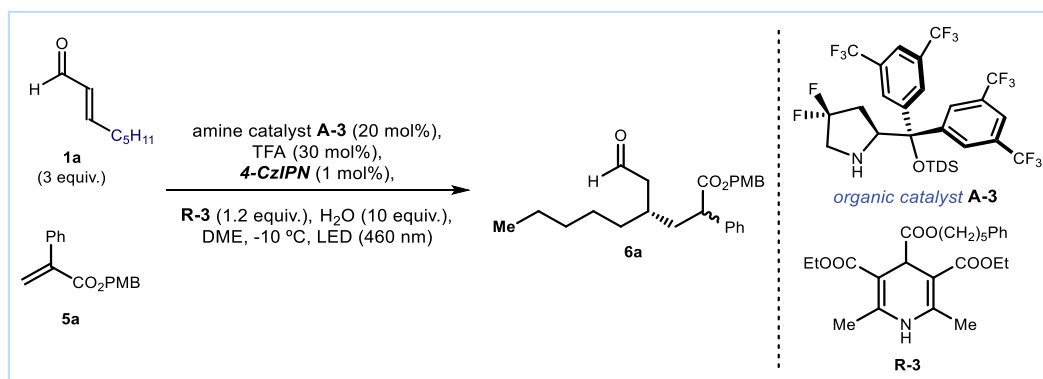

**Supplementary Figure 83:** Conditions for the quantum yield determination of the cross electrophile coupling. In this case, reductant **R-3** was used to guarantee homogeneity of the reaction mixture due to improved solubility.

A ferrioxalate actinometer solution was prepared by following the Hammond variation of the Hatchard and Parker procedure<sup>31</sup> outlined in the *Handbook of Photochemistry*.<sup>32</sup> Ferrioxalate actinometer solution measures the decomposition of Fe(III) to Fe(II) ions, which are complexed by 1,10-phenanthroline and monitored by UV/Vis absorbance at 510 nm. The number of moles of Fe(II)-phenanthroline complex formed are directly proportional to moles of photons absorbed. The values of the quantum yield of potassium ferrioxalate are related to concentration and wavelength.

The solutions were prepared and stored in the dark (wrapped with aluminium foil, red light environment):

0.012M Potassium ferrioxalate solution: 147.4 mg of potassium ferrioxalate (commercially available from Alfa Aesar) and 69.5  $\mu\text{L}$  of sulfuric acid (96%) were added to a 25 mL volumetric flask, and filled to the mark with HPLC grade water.

Phenanthroline solution: 100 mg of 1,10-phenanthroline in a 50 mL volumetric flask, filled to the mark with HPLC grade water (0.2% by weight).

Buffer solution: to a 100 mL volumetric flask 4.94 g of NaOAc and 1.0 mL of sulfuric acid (96%) were added and filled to the mark with HPLC grade water.

Internal standard solution: 1.261 g of 1,3,5-trimethoxybenzene was added to a 5 mL volumetric flask which was filled up with HPLC grade acetonitrile (1.50 M).

### Reaction setup.

**Reaction solution:** A Schlenk flask was charged with amine catalyst **A-3** (14.1 mg, 0.2 equiv., 20  $\mu\text{mol}$ ), DHP **R-3** (53.2 mg, 1.2 equiv., 120  $\mu\text{mol}$ ), which was chosen for its improved solubility, unsaturated ester **1a** (26.8 mg, 1.0 eq., 100  $\mu\text{mol}$ ), photocatalyst 4-CzIPN (0.8 mg, 1 mol%, 1.00  $\mu\text{mol}$ ), (*E*)-oct-2-enal (44.8  $\mu\text{L}$ , 3.0 eq., 300  $\mu\text{mol}$ ) and water (18  $\mu\text{L}$ , 10 equiv., 1.00 mmol). After four cycles of freeze-pump-thaw (with septum), TFA (2.2  $\mu\text{L}$ , 30.0  $\mu\text{mol}$ ) in DME (0.4 mL) and were added and the tube was sealed with parafilm and put in the HP-LED 460 nm at 1 cm distance at -10 °C with irradiance of 90 mW/cm<sup>2</sup>. Three different reactions were set up and irradiated for different times: 15 min, 30 min and 45 min. After each reaction was finished, internal standard solution (66  $\mu\text{L}$ , 0.1 mmol) was added. This solution was diluted with 3 mL of acetone, from the solution was taken 1 mL to be analyzed by GC-FID.

Actinometer solutions: A Schlenk flask of the same dimensions as used for the reaction mixtures was loaded with 0.4 mL of actinometer solution and placed on the HP-LED the same light intensity as the reaction (without freeze-pump-thaw). Three different actinometer solutions were irradiated in sequence for 10 s, 25 s and 40 s. To irradiate the Schlenk tube, it was placed on the holder with the light off and the light was turned on for the desired time. After each irradiation the actinometer solutions were carefully transferred into a 10 mL volumetric flask, then 0.5 mL of phenanthroline solution and 2.0 mL of buffer solution were added and the flask was filled up with water. The mixture was then analyzed by UV-Vis absorption spectroscopy (**Supplementary Figure 84**).

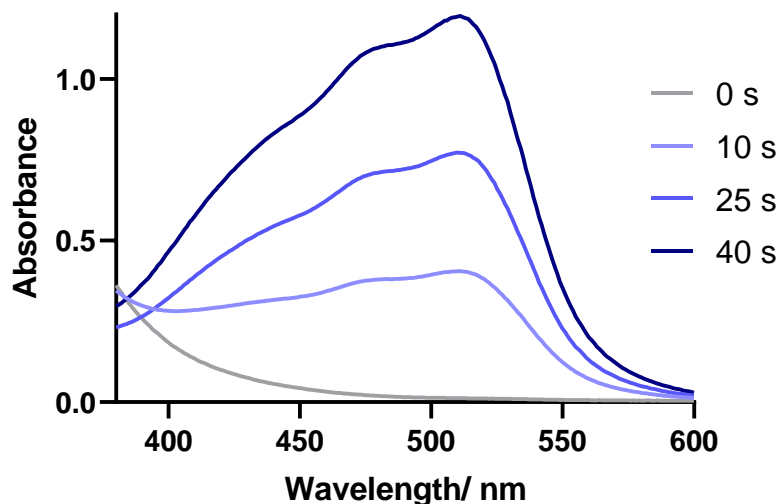

**Supplementary Figure 84:** UV-Vis spectra of the actinometer solutions irradiated for different periods.

The moles of Fe(II) formed for each sample are determined using Beers' Law (**Supplementary Equation 2**):

$$\text{Moles of Fe(II)} = \frac{V_1 V_3 \cdot \Delta A (510 \text{ nm})}{10^3 V_2 l \cdot \varepsilon (510 \text{ nm})} \quad (2)$$

where  $V_1$  is the irradiated volume (0.4 mL),  $V_2$  is the aliquot of the irradiated solution taken for the quantification of the Fe(II) complex (0.4 mL),  $V_3$  is the final volume after complexation with phenanthroline (10 mL),  $l$  is the optical path-length of the irradiation cell (1 cm),  $\Delta A (510 \text{ nm})$  is the optical difference in absorbance between the irradiated solution and the one stored in the dark,  $\varepsilon_{510 \text{ nm}}$  is the extinction coefficient the complex  $[\text{Fe}(\text{phen})_3]^{2+}$  at 510 nm ( $11100 \text{ L mol}^{-1} \text{ cm}^{-1}$ ).

The moles of Fe(II) formed ( $x$ ) are plotted as a function of time ( $t$ ) (**Supplementary Figure 85**). The slope of this line was correlated to the moles of incident photons by unit of time ( $q_{n,p}^0$ ) by the use of the following **Supplementary Equation 3**:

$$\Phi(\lambda) = \frac{dx/dt}{q_{n,p}^0 [1 - 10^{-A(\lambda)}]} \quad (3)$$

where the quantum yield ( $\Phi$ ) for formation of Fe(II) at 458 nm is  $1.11^{33}$ ,  $dx/dt$  is the rate of change of a measurable quantity (spectral or any other property),  $[1 - 10^{-A(\lambda)}]$  is the ratio of absorbed photons by the solution, and  $A(\lambda)$  is the absorbance of the actinometer at the wavelength used to carry out the experiments (460 nm). The absorbance at 460 nm was 0.03.

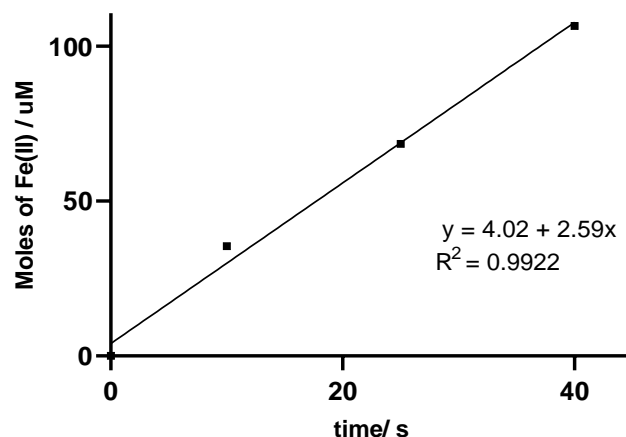

**Supplementary Figure 85:** Plot of the moles of Fe(II) generated from the irradiation of the actinometer solutions against time.

The photon flux, which is  $q_{n,p}^0$ , was determined to  $3.08 \times 10^{-7} \text{ einstein s}^{-1}$ .

The moles of product **6a** per unit of time are plotted against the number of photons absorbed (**Supplementary Figure 86**). The photons absorbed are correlated to the number of incident photons by the use of Equiv. 3. According to this, if we plot the moles of product (y-axis) versus the moles of incident photons ( $q_{n,p}^0 dt$ , x-axis), the slope is equal to:

$$\text{slope} = \Phi [1 - 10^{-A(460 \text{ nm})}] \quad (4)$$

where  $\Phi$  is the quantum yield to be determined and  $A_{460 \text{ nm}}$  is the absorption of the reaction under study.  $A_{460 \text{ nm}}$  was measured to be of 0.12 for the model reaction mixture after 25-fold dilution.

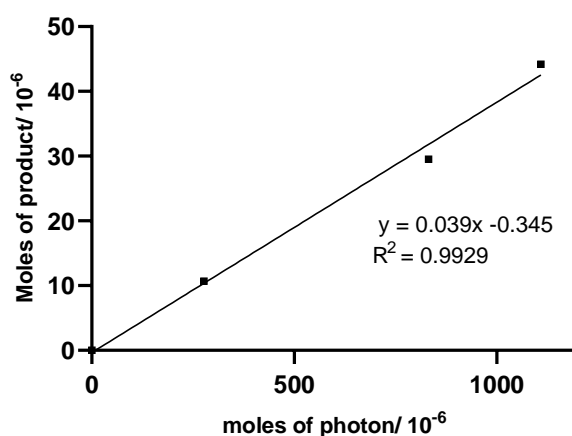

**Supplementary Figure 86:** Plot of the moles of products **6a** generated from the irradiation of the reaction solutions, against the moles of photons absorbed.

**The quantum yield of the cross electrophile coupling process was calculated to be 0.04.**

## X-Ray Crystallography

### Single Crystal X-ray Diffraction Data for the 4-nitrobenzoate derivative of $\beta$ -cyano alcohol **3d** (**Ac-3d**)

4-Nitrobenzoate derivative **Ac-3d** was obtained from an analytical sample prepared according to the general procedure as described in the Supplementary Figure 5 using  $\beta$ -cyano alcohol **3d**. Crystals of the compound **Ac-3d** were obtained by slow evaporation of a dichloromethane/hexane solution. *Data Collection.* Measurements were performed at 100 K on a Bruker Kappa Apex II DUO diffractometer equipped with a Cryostream 700 plus low temperature device, a microsource anode with Mo K $\alpha$  ( $\lambda = 0.71073$  Å).

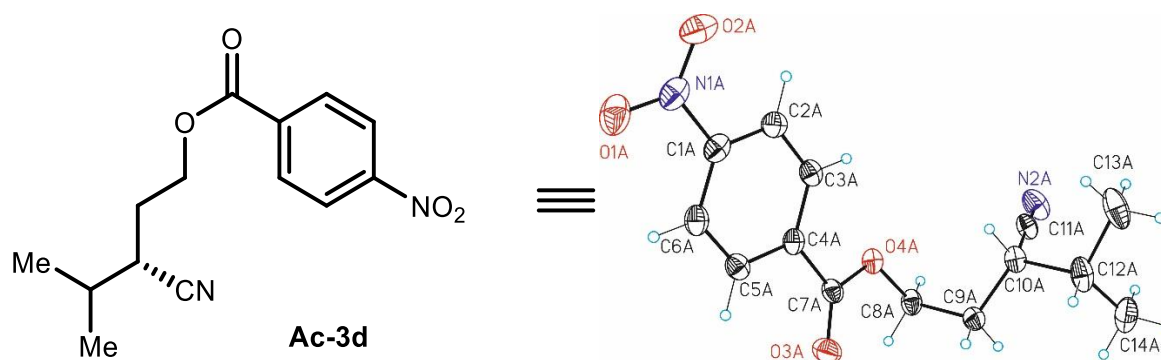

Supplementary Figure 87: Structure of **Ac-3d**.

This chiral compound crystallizes in the space group P21 with two identical molecules (A and B) in the asymmetric unit. One of the molecules is disordered in two inverted orientations of the chiral center with a ratio 82:18. The absolute structure could be determined reliably with a Flack value based on Parsons' quotients of 0.02(8)<sup>34-37</sup> Flack X determined using 2186 quotients [(I+)-(I-)]/[(I+)+(I-)]. The Flack parameter value for the correct absolute structure determination should be 0; the inverted structure would give 1; always taking in account the standard deviation. For molecule A the absolute configuration was assigned with S(C10A). In molecule B the absolute configuration was assigned with 82% of configuration S(C10B) and 18% of configuration R(C10'). Adding the results, it was determined that the majoritarian part of the structure (91%) shows S configuration and a minoritarian part (9%) shows a R configuration in accordance with the e.r. value obtained in the preparation of the product. The structure is of excellent quality (no A- or B-alerts) and of publishable quality with a R1 value of 3.07%.

#### Crystal data and structure refinement for **Ac-3d**. **CCDC2197381**

|                      |                                                                                          |
|----------------------|------------------------------------------------------------------------------------------|
| Identification code  | cu_MBE389_0m                                                                             |
| Empirical formula    | C <sub>28</sub> H <sub>32</sub> N <sub>4</sub> O <sub>8</sub>                            |
| Formula weight       | 552.57                                                                                   |
| Temperature          | 100(2)K                                                                                  |
| Wavelength           | 1.54178 Å                                                                                |
| Crystal system       | monoclinic                                                                               |
| Space group          | P 21                                                                                     |
| Unit cell dimensions | a = 7.2034(2)Å a = 90°.<br>b = 18.8414(6)Å b = 91.8741(14)°.<br>c = 10.3566(3)Å g = 90°. |
| Volume               | 1404.87(7) Å <sup>3</sup>                                                                |
| Z                    | 2                                                                                        |
| Density (calculated) | 1.306 Mg/m <sup>3</sup>                                                                  |

|                                   |                                             |
|-----------------------------------|---------------------------------------------|
| Absorption coefficient            | 0.806 mm <sup>-1</sup>                      |
| F(000)                            | 584                                         |
| Crystal size                      | 0.200 x 0.200 x 0.010 mm <sup>3</sup>       |
| Theta range for data collection   | 4.271 to 67.930°.                           |
| Index ranges                      | -8<=h<=8,-22<=k<=21,-8<=l<=12               |
| Reflections collected             | 11462                                       |
| Independent reflections           | 4916[R(int) = 0.0278]                       |
| Completeness to theta =67.930°    | 98.6%                                       |
| Absorption correction             | Multi-scan                                  |
| Max. and min. transmission        | 0.75 and 0.65                               |
| Refinement method                 | Full-matrix least-squares on F <sup>2</sup> |
| Data / restraints / parameters    | 4916/ 99/ 432                               |
| Goodness-of-fit on F <sup>2</sup> | 1.058                                       |
| Final R indices [I>2sigma(I)]     | R1 = 0.0307, wR2 = 0.0814                   |
| R indices (all data)              | R1 = 0.0315, wR2 = 0.0819                   |
| Flack parameter                   | x =0.02(8)                                  |
| Largest diff. peak and hole       | 0.189 and -0.158 e.Å <sup>-3</sup>          |

Bond lengths [Å] and angles [°] for **Ac-3d**. *CCDC2197381*

---

Bond lengths

|      |      |          |
|------|------|----------|
| O1A  | N1A  | 1.225(3) |
| O2A  | N1A  | 1.229(3) |
| O3A  | C7A  | 1.203(3) |
| O4A  | C7A  | 1.340(3) |
| O4A  | C8A  | 1.454(3) |
| N1A  | C1A  | 1.475(3) |
| N2A  | C11A | 1.145(3) |
| C1A  | C2A  | 1.382(4) |
| C1A  | C6A  | 1.385(4) |
| C2A  | C3A  | 1.388(3) |
| C2A  | H2A  | 0.9500   |
| C3A  | C4A  | 1.389(3) |
| C3A  | H3A  | 0.9500   |
| C4A  | C5A  | 1.391(4) |
| C4A  | C7A  | 1.496(3) |
| C5A  | C6A  | 1.385(3) |
| C5A  | H5A  | 0.9500   |
| C6A  | H6A  | 0.9500   |
| C8A  | C9A  | 1.517(3) |
| C8A  | H8AA | 0.9900   |
| C8A  | H8AB | 0.9900   |
| C9A  | C10A | 1.533(3) |
| C9A  | H9AA | 0.9900   |
| C9A  | H9AB | 0.9900   |
| C10A | C11A | 1.470(3) |
| C10A | C12A | 1.547(3) |
| C10A | H10A | 1.0000   |
| C12A | C14A | 1.522(4) |
| C12A | C13A | 1.530(4) |
| C12A | H12A | 1.0000   |
| C13A | H13A | 0.9800   |
| C13A | H13B | 0.9800   |
| C13A | H13C | 0.9800   |
| C14A | H14A | 0.9800   |
| C14A | H14B | 0.9800   |
| C14A | H14C | 0.9800   |
| O1B  | N1B  | 1.224(3) |
| O2B  | N1B  | 1.228(3) |
| O3B  | C7B  | 1.204(3) |

O4B C7B 1.338(3)  
 O4B C8B 1.449(3)  
 N1B C1B 1.472(3)  
 C1B C6B 1.381(4)  
 C1B C2B 1.385(3)  
 C2B C3B 1.386(3)  
 C2B H2B 0.9500  
 C3B C4B 1.389(4)  
 C3B H3B 0.9500  
 C4B C5B 1.399(3)  
 C4B C7B 1.494(3)  
 C5B C6B 1.382(3)  
 C5B H5B 0.9500  
 C6B H6B 0.9500  
 C8B C9' 1.322(17)  
 C8B C9B 1.550(4)  
 C8B H8BA 0.9900  
 C8B H8BB 0.9900  
 C8B H8BX 0.9900  
 C8B H8BY 0.9900  
 N2B C11B 1.145(4)  
 C9B C10B 1.536(4)  
 C9B H9BA 0.9900  
 C9B H9BB 0.9900  
 C10B C11B 1.470(4)  
 C10B C12B 1.548(4)  
 C10B H10B 1.0000  
 C12B C13B 1.527(6)  
 C12B C14B 1.534(5)  
 C12B H12B 1.0000  
 C13B H13D 0.9800  
 C13B H13E 0.9800  
 C13B H13F 0.9800  
 C14B H14D 0.9800  
 C14B H14E 0.9800  
 C14B H14F 0.9800  
 N2' C11' 1.11(2)  
 C9' C10' 1.46(3)  
 C9' H9BC 0.9900  
 C9' H9BD 0.9900  
 C10' C11' 1.52(2)  
 C10' C12' 1.59(2)  
 C10' H10' 1.0000  
 C12' C13' 1.45(3)  
 C12' C14' 1.52(3)  
 C12' H12' 1.0000  
 C13' H13G 0.9800  
 C13' H13H 0.9800  
 C13' H13I 0.9800  
 C14' H14G 0.9800  
 C14' H14H 0.9800  
 C14' H14I 0.9800

#### Angles

C7A O4A C8A 116.25(18)  
 O1A N1A O2A 124.1(2)  
 O1A N1A C1A 118.0(2)  
 O2A N1A C1A 117.9(2)  
 C2A C1A C6A 123.0(2)  
 C2A C1A N1A 118.7(2)  
 C6A C1A N1A 118.2(2)



|      |      |      |            |
|------|------|------|------------|
| C1A  | C2A  | C3A  | 118.2(2)   |
| C1A  | C2A  | H2A  | 120.9      |
| C3A  | C2A  | H2A  | 120.9      |
| C2A  | C3A  | C4A  | 119.7(2)   |
| C2A  | C3A  | H3A  | 120.1      |
| C4A  | C3A  | H3A  | 120.1      |
| C3A  | C4A  | C5A  | 121.0(2)   |
| C3A  | C4A  | C7A  | 121.6(2)   |
| C5A  | C4A  | C7A  | 117.4(2)   |
| C6A  | C5A  | C4A  | 119.8(2)   |
| C6A  | C5A  | H5A  | 120.1      |
| C4A  | C5A  | H5A  | 120.1      |
| C5A  | C6A  | C1A  | 118.2(2)   |
| C5A  | C6A  | H6A  | 120.9      |
| C1A  | C6A  | H6A  | 120.9      |
| O3A  | C7A  | O4A  | 124.4(2)   |
| O3A  | C7A  | C4A  | 123.5(2)   |
| O4A  | C7A  | C4A  | 112.08(19) |
| O4A  | C8A  | C9A  | 109.83(18) |
| O4A  | C8A  | H8AA | 109.7      |
| C9A  | C8A  | H8AA | 109.7      |
| O4A  | C8A  | H8AB | 109.7      |
| C9A  | C8A  | H8AB | 109.7      |
| H8AA | C8A  | H8AB | 108.2      |
| C8A  | C9A  | C10A | 113.50(19) |
| C8A  | C9A  | H9AA | 108.9      |
| C10A | C9A  | H9AA | 108.9      |
| C8A  | C9A  | H9AB | 108.9      |
| C10A | C9A  | H9AB | 108.9      |
| H9AA | C9A  | H9AB | 107.7      |
| C11A | C10A | C9A  | 109.66(18) |
| C11A | C10A | C12A | 110.26(19) |
| C9A  | C10A | C12A | 114.1(2)   |
| C11A | C10A | H10A | 107.5      |
| C9A  | C10A | H10A | 107.5      |
| C12A | C10A | H10A | 107.5      |
| N2A  | C11A | C10A | 177.8(3)   |
| C14A | C12A | C13A | 111.5(2)   |
| C14A | C12A | C10A | 112.4(2)   |
| C13A | C12A | C10A | 109.9(2)   |
| C14A | C12A | H12A | 107.6      |
| C13A | C12A | H12A | 107.6      |
| C10A | C12A | H12A | 107.6      |
| C12A | C13A | H13A | 109.5      |
| C12A | C13A | H13B | 109.5      |
| H13A | C13A | H13B | 109.5      |
| C12A | C13A | H13C | 109.5      |
| H13A | C13A | H13C | 109.5      |
| H13B | C13A | H13C | 109.5      |
| C12A | C14A | H14A | 109.5      |
| C12A | C14A | H14B | 109.5      |
| H14A | C14A | H14B | 109.5      |
| C12A | C14A | H14C | 109.5      |
| H14A | C14A | H14C | 109.5      |
| H14B | C14A | H14C | 109.5      |
| C7B  | O4B  | C8B  | 118.02(19) |
| O1B  | N1B  | O2B  | 123.8(2)   |
| O1B  | N1B  | C1B  | 118.3(2)   |
| O2B  | N1B  | C1B  | 117.9(2)   |
| C6B  | C1B  | C2B  | 122.9(2)   |
| C6B  | C1B  | N1B  | 118.4(2)   |

|      |      |      |          |
|------|------|------|----------|
| C2B  | C1B  | N1B  | 118.7(2) |
| C1B  | C2B  | C3B  | 118.1(2) |
| C1B  | C2B  | H2B  | 120.9    |
| C3B  | C2B  | H2B  | 120.9    |
| C2B  | C3B  | C4B  | 120.2(2) |
| C2B  | C3B  | H3B  | 119.9    |
| C4B  | C3B  | H3B  | 119.9    |
| C3B  | C4B  | C5B  | 120.4(2) |
| C3B  | C4B  | C7B  | 118.4(2) |
| C5B  | C4B  | C7B  | 121.2(2) |
| C6B  | C5B  | C4B  | 119.8(2) |
| C6B  | C5B  | H5B  | 120.1    |
| C4B  | C5B  | H5B  | 120.1    |
| C1B  | C6B  | C5B  | 118.6(2) |
| C1B  | C6B  | H6B  | 120.7    |
| C5B  | C6B  | H6B  | 120.7    |
| O3B  | C7B  | O4B  | 125.0(2) |
| O3B  | C7B  | C4B  | 123.6(2) |
| O4B  | C7B  | C4B  | 111.3(2) |
| C9'  | C8B  | O4B  | 128.7(9) |
| O4B  | C8B  | C9B  | 104.0(2) |
| O4B  | C8B  | H8BA | 111.0    |
| C9B  | C8B  | H8BA | 111.0    |
| O4B  | C8B  | H8BB | 111.0    |
| C9B  | C8B  | H8BB | 111.0    |
| H8BA | C8B  | H8BB | 109.0    |
| C9'  | C8B  | H8BX | 105.1    |
| O4B  | C8B  | H8BX | 105.1    |
| C9'  | C8B  | H8BY | 105.1    |
| O4B  | C8B  | H8BY | 105.1    |
| H8BX | C8B  | H8BY | 105.9    |
| C10B | C9B  | C8B  | 113.6(2) |
| C10B | C9B  | H9BA | 108.9    |
| C8B  | C9B  | H9BA | 108.9    |
| C10B | C9B  | H9BB | 108.9    |
| C8B  | C9B  | H9BB | 108.9    |
| H9BA | C9B  | H9BB | 107.7    |
| C11B | C10B | C9B  | 109.9(2) |
| C11B | C10B | C12B | 110.2(2) |
| C9B  | C10B | C12B | 112.0(3) |
| C11B | C10B | H10B | 108.2    |
| C9B  | C10B | H10B | 108.2    |
| C12B | C10B | H10B | 108.2    |
| N2B  | C11B | C10B | 179.3(4) |
| C13B | C12B | C14B | 111.0(3) |
| C13B | C12B | C10B | 112.9(4) |
| C14B | C12B | C10B | 111.0(3) |
| C13B | C12B | H12B | 107.2    |
| C14B | C12B | H12B | 107.2    |
| C10B | C12B | H12B | 107.2    |
| C12B | C13B | H13D | 109.5    |
| C12B | C13B | H13E | 109.5    |
| H13D | C13B | H13E | 109.5    |
| C12B | C13B | H13F | 109.5    |
| H13D | C13B | H13F | 109.5    |
| H13E | C13B | H13F | 109.5    |
| C12B | C14B | H14D | 109.5    |
| C12B | C14B | H14E | 109.5    |
| H14D | C14B | H14E | 109.5    |
| C12B | C14B | H14F | 109.5    |
| H14D | C14B | H14F | 109.5    |

H14E C14B H14F 109.5  
 C8B C9' C10' 105.2(16)  
 C8B C9' H9BC 110.7  
 C10' C9' H9BC 110.7  
 C8B C9' H9BD 110.7  
 C10' C9' H9BD 110.7  
 H9BC C9' H9BD 108.8  
 C9' C10' C11' 108.6(12)  
 C9' C10' C12' 117.6(14)  
 C11' C10' C12' 107.1(14)  
 C9' C10' H10' 107.7  
 C11' C10' H10' 107.7  
 C12' C10' H10' 107.7  
 N2' C11' C10' 179(2)  
 C13' C12' C14' 113.8(17)  
 C13' C12' C10' 110.6(18)  
 C14' C12' C10' 112.8(15)  
 C13' C12' H12' 106.3  
 C14' C12' H12' 106.3  
 C10' C12' H12' 106.3  
 C12' C13' H13G 109.5  
 C12' C13' H13H 109.5  
 H13G C13' H13H 109.5  
 C12' C13' H13I 109.5  
 H13G C13' H13I 109.5  
 H13H C13' H13I 109.5  
 C12' C14' H14G 109.5  
 C12' C14' H14H 109.5  
 H14G C14' H14H 109.5  
 C12' C14' H14I 109.5  
 H14G C14' H14I 109.5  
 H14H C14' H14I 109.5

Torsion angles [°] for **Ac-3d**. *CCDC2197381*

---

O1A N1A C1A C2A 175.8(2)  
 O2A N1A C1A C2A -6.0(3)  
 O1A N1A C1A C6A -6.6(3)  
 O2A N1A C1A C6A 171.6(2)  
 C6A C1A C2A C3A -0.6(3)  
 N1A C1A C2A C3A 176.77(18)  
 C1A C2A C3A C4A -0.9(3)  
 C2A C3A C4A C5A 1.7(3)  
 C2A C3A C4A C7A -176.63(19)  
 C3A C4A C5A C6A -1.0(3)  
 C7A C4A C5A C6A 177.41(18)  
 C4A C5A C6A C1A -0.5(3)  
 C2A C1A C6A C5A 1.3(3)  
 N1A C1A C6A C5A -176.09(19)  
 C8A O4A C7A O3A -2.9(3)  
 C8A O4A C7A C4A 175.97(16)  
 C3A C4A C7A O3A 167.4(2)  
 C5A C4A C7A O3A -11.0(3)  
 C3A C4A C7A O4A -11.5(3)  
 C5A C4A C7A O4A 170.11(18)  
 C7A O4A C8A C9A -85.8(2)  
 O4A C8A C9A C10A -59.7(3)  
 C8A C9A C10A C11A -59.9(3)  
 C8A C9A C10A C12A 175.8(2)  
 C11A C10A C12A C14A -58.4(3)  
 C9A C10A C12A C14A 65.5(3)

C11A C10A C12A C13A 66.4(3)  
 C9A C10A C12A C13A -169.7(2)  
 O1B N1B C1B C6B -177.3(2)  
 O2B N1B C1B C6B 3.3(3)  
 O1B N1B C1B C2B 4.4(3)  
 O2B N1B C1B C2B -175.0(2)  
 C6B C1B C2B C3B -0.5(3)  
 N1B C1B C2B C3B 177.75(18)  
 C1B C2B C3B C4B 1.0(3)  
 C2B C3B C4B C5B -0.7(3)  
 C2B C3B C4B C7B -179.16(18)  
 C3B C4B C5B C6B -0.2(3)  
 C7B C4B C5B C6B 178.18(18)  
 C2B C1B C6B C5B -0.4(3)  
 N1B C1B C6B C5B -178.67(18)  
 C4B C5B C6B C1B 0.8(3)  
 C8B O4B C7B O3B 13.7(3)  
 C8B O4B C7B C4B -165.90(17)  
 C3B C4B C7B O3B 9.7(3)  
 C5B C4B C7B O3B -168.7(2)  
 C3B C4B C7B O4B -170.65(18)  
 C5B C4B C7B O4B 10.9(3)  
 C7B O4B C8B C9' 73.3(12)  
 C7B O4B C8B C9B 93.9(3)  
 O4B C8B C9B C10B 166.1(2)  
 C8B C9B C10B C11B -63.2(3)  
 C8B C9B C10B C12B 174.0(3)  
 C11B C10B C12B C13B -66.3(4)  
 C9B C10B C12B C13B 56.3(4)  
 C11B C10B C12B C14B 59.1(4)  
 C9B C10B C12B C14B -178.3(3)  
 O4B C8B C9' C10' 67.6(13)  
 C8B C9' C10' C11' 65.3(16)  
 C8B C9' C10' C12' -173.0(12)  
 C9' C10' C12' C13' 167.4(18)  
 C11' C10' C12' C13' -70(2)  
 C9' C10' C12' C14' -63.8(19)  
 C11' C10' C12' C14' 58.7(19)

#### Symetry operations

- 
- 1 'x, y, z'  
 2 '-x, y+1/2, -z'

### Single Crystal X-ray Diffraction Data for the 4-nitrobenzoate derivative of diol **7e** (**Ac-7e**)

4-Nitrobenzoate derivative **Ac-7e** was obtained from an analytical sample prepared according to the general procedure as described in the Supplementray Figure 5 using diol **7e** obtained upon reduction of 1,6-dicarbonyl **6e**. Crystals of the compound **Ac-7e** were obtained by slow evaporation of a dichloromethane/hexane solution. *Data Collection.* Measurements were performed at 100 K on a Bruker Kappa Apex II DUO diffractometer equipped with a Cryostream 700 plus low temperature device, a microsource anode with Mo K $\alpha$  ( $\lambda = 0.71073$  Å).

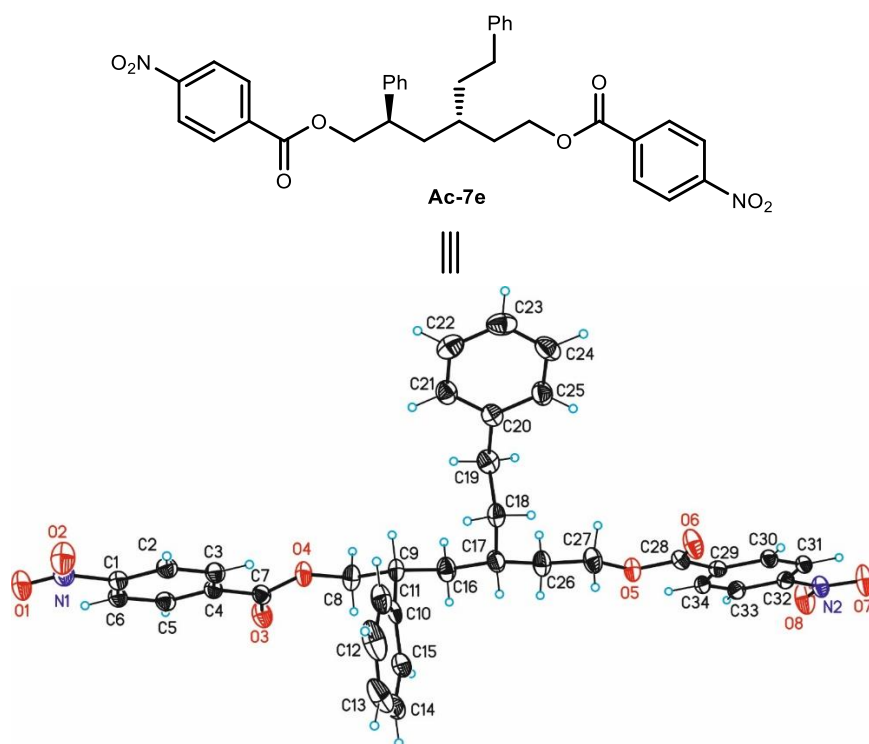

Supplementary Figure 88: Structure of **Ac-7e**.

This chiral compound crystallizes in the space group P1 showing disorder in the group with the benzene ring (atoms C18 to C25) with a ratio of 75:25. Both disordered orientations show the same stereochemistry. The absolute structure could be determined reliably with a Flack value based on Parsons' quotients of -0.05(9)<sup>34-37</sup>. Flack X determined using 1202 quotients  $[(I^+) - (I^-)] / [(I^+) + (I^-)]$ . The Flack parameter value for the correct absolute structure determination should be 0; the inverted structure would give 1; always taking in account the standard deviation. The absolute configuration based on the absolute structure of the measured crystal was determined with S(C9), R(C17). The structure is of excellent quality (no A-alerts and *one commented B-alerts related to the poor data to parameter ratio*, see CIF/checkCIF) and of publishable quality with a R1 value of 3.18%.

The B alert in the checkCIF file is due to formation of small chiral crystals of low symmetry (Space group P1) which were measured using CuKalfa radiation. Additionally, the structure showed disorder which enlarged the number of parameters. Maximum exposition time and intensity was used for the measurement. The data measured were considered of enough quality for publication.

Crystal data and structure refinement for **Ac-7e**. *CCDC 2197380*

|                                   |                                                                                                       |
|-----------------------------------|-------------------------------------------------------------------------------------------------------|
| Identification code               | cu_YBA203D1-c_0m                                                                                      |
| Empirical formula                 | C <sub>34</sub> H <sub>32</sub> N <sub>2</sub> O <sub>8</sub>                                         |
| Formula weight                    | 596.61                                                                                                |
| Temperature                       | 100(2)K                                                                                               |
| Wavelength                        | 1.54178 Å                                                                                             |
| Crystal system                    | triclinic                                                                                             |
| Space group                       | P 1                                                                                                   |
| Unit cell dimensions              | a = 6.9484(2)Å a = 82.727(2)°.<br>b = 7.1418(2)Å b = 86.432(2)°.<br>c = 15.8024(5)Å g = 75.4121(19)°. |
| Volume                            | 752.42(4) Å <sup>3</sup>                                                                              |
| Z                                 | 1                                                                                                     |
| Density (calculated)              | 1.317 Mg/m <sup>3</sup>                                                                               |
| Absorption coefficient            | 0.778 mm <sup>-1</sup>                                                                                |
| F(000)                            | 314                                                                                                   |
| Crystal size                      | 0.300 x 0.030 x 0.020 mm <sup>3</sup>                                                                 |
| Theta range for data collection   | 2.820 to 66.476°.                                                                                     |
| Index ranges                      | -8<=h<=8,-8<=k<=8,-16<=l<=18                                                                          |
| Reflections collected             | 8999                                                                                                  |
| Independent reflections           | 4737[R(int) = 0.0243]                                                                                 |
| Completeness to theta =66.476°    | 96.8%                                                                                                 |
| Absorption correction             | Multi-scan                                                                                            |
| Max. and min. transmission        | 0.75 and 0.52                                                                                         |
| Refinement method                 | Full-matrix least-squares on F <sup>2</sup>                                                           |
| Data / restraints / parameters    | 4737/ 150/ 469                                                                                        |
| Goodness-of-fit on F <sup>2</sup> | 1.046                                                                                                 |
| Final R indices [I>2sigma(I)]     | R1 = 0.0318, wR2 = 0.0823                                                                             |
| R indices (all data)              | R1 = 0.0356, wR2 = 0.0848                                                                             |
| Flack parameter                   | x =-0.05(9)                                                                                           |
| Largest diff. peak and hole       | 0.116 and -0.193 e.Å <sup>-3</sup>                                                                    |

Bond lengths [Å] and angles [°] for **Ac-7e**. *CCDC 2197380*

| Bond lengths---- |     |          |
|------------------|-----|----------|
| O1               | N1  | 1.229(3) |
| O2               | N1  | 1.223(3) |
| O3               | C7  | 1.206(3) |
| O4               | C7  | 1.333(3) |
| O4               | C8  | 1.450(3) |
| O5               | C28 | 1.330(3) |
| O5               | C27 | 1.461(3) |
| O6               | C28 | 1.201(3) |
| O7               | N2  | 1.223(3) |
| O8               | N2  | 1.219(3) |
| N1               | C1  | 1.473(3) |
| N2               | C32 | 1.469(3) |
| C1               | C2  | 1.386(4) |
| C1               | C6  | 1.386(3) |
| C2               | C3  | 1.380(4) |
| C2               | H2  | 0.9500   |
| C3               | C4  | 1.402(3) |
| C3               | H3  | 0.9500   |
| C4               | C5  | 1.388(4) |
| C4               | C7  | 1.494(4) |
| C5               | C6  | 1.382(4) |
| C5               | H5  | 0.9500   |
| C6               | H6  | 0.9500   |

|      |      |           |
|------|------|-----------|
| C8   | C9   | 1.523(4)  |
| C8   | H8A  | 0.9900    |
| C8   | H8B  | 0.9900    |
| C9   | C10  | 1.510(3)  |
| C9   | C16  | 1.528(3)  |
| C9   | H9   | 1.0000    |
| C10  | C15  | 1.385(4)  |
| C10  | C11  | 1.393(3)  |
| C11  | C12  | 1.390(5)  |
| C11  | H11  | 0.9500    |
| C12  | C13  | 1.377(6)  |
| C12  | H12  | 0.9500    |
| C13  | C14  | 1.371(5)  |
| C13  | H13  | 0.9500    |
| C14  | C15  | 1.384(4)  |
| C14  | H14  | 0.9500    |
| C15  | H15  | 0.9500    |
| C16  | C17  | 1.528(4)  |
| C16  | H16A | 0.9900    |
| C16  | H16B | 0.9900    |
| C17  | C26  | 1.531(3)  |
| C17  | C18  | 1.563(4)  |
| C17  | C18' | 1.586(10) |
| C17  | H17  | 1.0000    |
| C17  | H17' | 1.0000    |
| C26  | C27  | 1.487(4)  |
| C26  | H26A | 0.9900    |
| C26  | H26B | 0.9900    |
| C27  | H27A | 0.9900    |
| C27  | H27B | 0.9900    |
| C28  | C29  | 1.496(3)  |
| C29  | C30  | 1.392(4)  |
| C29  | C34  | 1.393(3)  |
| C30  | C31  | 1.382(3)  |
| C30  | H30  | 0.9500    |
| C31  | C32  | 1.386(3)  |
| C31  | H31  | 0.9500    |
| C32  | C33  | 1.383(4)  |
| C33  | C34  | 1.382(4)  |
| C33  | H33  | 0.9500    |
| C34  | H34  | 0.9500    |
| C18  | C19  | 1.532(5)  |
| C18  | H18A | 0.9900    |
| C18  | H18B | 0.9900    |
| C19  | C20  | 1.508(5)  |
| C19  | H19A | 0.9900    |
| C19  | H19B | 0.9900    |
| C20  | C25  | 1.386(6)  |
| C20  | C21  | 1.391(6)  |
| C21  | C22  | 1.394(8)  |
| C21  | H21  | 0.9500    |
| C22  | C23  | 1.379(7)  |
| C22  | H22  | 0.9500    |
| C23  | C24  | 1.370(7)  |
| C23  | H23  | 0.9500    |
| C24  | C25  | 1.391(7)  |
| C24  | H24  | 0.9500    |
| C25  | H25  | 0.9500    |
| C18' | C19' | 1.541(10) |
| C18' | H18C | 0.9900    |
| C18' | H18D | 0.9900    |

C19' C20' 1.508(10)  
 C19' H19C 0.9900  
 C19' H19D 0.9900  
 C20' C25' 1.379(11)  
 C20' C21' 1.391(11)  
 C21' C22' 1.397(13)  
 C21' H21' 0.9500  
 C22' C23' 1.377(12)  
 C22' H22' 0.9500  
 C23' C24' 1.369(12)  
 C23' H23' 0.9500  
 C24' C25' 1.393(12)  
 C24' H24' 0.9500  
 C25' H25' 0.9500

Angles

C7 O4 C8 117.3(2)  
 C28 O5 C27 114.90(19)  
 O2 N1 O1 123.8(2)  
 O2 N1 C1 118.4(2)  
 O1 N1 C1 117.8(2)  
 O8 N2 O7 123.6(2)  
 O8 N2 C32 118.7(2)  
 O7 N2 C32 117.8(2)  
 C2 C1 C6 122.9(2)  
 C2 C1 N1 118.8(2)  
 C6 C1 N1 118.4(2)  
 C3 C2 C1 118.2(2)  
 C3 C2 H2 120.9  
 C1 C2 H2 120.9  
 C2 C3 C4 120.0(2)  
 C2 C3 H3 120.0  
 C4 C3 H3 120.0  
 C5 C4 C3 120.4(2)  
 C5 C4 C7 117.9(2)  
 C3 C4 C7 121.8(2)  
 C6 C5 C4 120.1(2)  
 C6 C5 H5 119.9  
 C4 C5 H5 119.9  
 C5 C6 C1 118.3(2)  
 C5 C6 H6 120.8  
 C1 C6 H6 120.8  
 O3 C7 O4 124.0(2)  
 O3 C7 C4 124.2(2)  
 O4 C7 C4 111.8(2)  
 O4 C8 C9 106.59(19)  
 O4 C8 H8A 110.4  
 C9 C8 H8A 110.4  
 O4 C8 H8B 110.4  
 C9 C8 H8B 110.4  
 H8A C8 H8B 108.6  
 C10 C9 C8 109.8(2)  
 C10 C9 C16 114.1(2)  
 C8 C9 C16 109.4(2)  
 C10 C9 H9 107.8  
 C8 C9 H9 107.8  
 C16 C9 H9 107.8  
 C15 C10 C11 117.6(2)  
 C15 C10 C9 121.4(2)  
 C11 C10 C9 120.9(2)  
 C12 C11 C10 120.7(3)



|      |     |      |            |
|------|-----|------|------------|
| C12  | C11 | H11  | 119.6      |
| C10  | C11 | H11  | 119.6      |
| C13  | C12 | C11  | 120.5(3)   |
| C13  | C12 | H12  | 119.8      |
| C11  | C12 | H12  | 119.8      |
| C14  | C13 | C12  | 119.4(3)   |
| C14  | C13 | H13  | 120.3      |
| C12  | C13 | H13  | 120.3      |
| C13  | C14 | C15  | 120.3(3)   |
| C13  | C14 | H14  | 119.9      |
| C15  | C14 | H14  | 119.9      |
| C14  | C15 | C10  | 121.5(2)   |
| C14  | C15 | H15  | 119.3      |
| C10  | C15 | H15  | 119.3      |
| C17  | C16 | C9   | 114.4(2)   |
| C17  | C16 | H16A | 108.7      |
| C9   | C16 | H16A | 108.7      |
| C17  | C16 | H16B | 108.7      |
| C9   | C16 | H16B | 108.7      |
| H16A | C16 | H16B | 107.6      |
| C16  | C17 | C26  | 109.8(2)   |
| C16  | C17 | C18  | 116.9(2)   |
| C26  | C17 | C18  | 116.0(2)   |
| C16  | C17 | C18' | 99.0(4)    |
| C26  | C17 | C18' | 99.8(4)    |
| C16  | C17 | H17  | 104.1      |
| C26  | C17 | H17  | 104.1      |
| C18  | C17 | H17  | 104.1      |
| C16  | C17 | H17' | 115.3      |
| C26  | C17 | H17' | 115.3      |
| C18' | C17 | H17' | 115.3      |
| C27  | C26 | C17  | 112.2(2)   |
| C27  | C26 | H26A | 109.2      |
| C17  | C26 | H26A | 109.2      |
| C27  | C26 | H26B | 109.2      |
| C17  | C26 | H26B | 109.2      |
| H26A | C26 | H26B | 107.9      |
| O5   | C27 | C26  | 108.65(19) |
| O5   | C27 | H27A | 110.0      |
| C26  | C27 | H27A | 110.0      |
| O5   | C27 | H27B | 110.0      |
| C26  | C27 | H27B | 110.0      |
| H27A | C27 | H27B | 108.3      |
| O6   | C28 | O5   | 123.7(2)   |
| O6   | C28 | C29  | 123.2(2)   |
| O5   | C28 | C29  | 113.12(19) |
| C30  | C29 | C34  | 120.3(2)   |
| C30  | C29 | C28  | 117.0(2)   |
| C34  | C29 | C28  | 122.7(2)   |
| C31  | C30 | C29  | 120.5(2)   |
| C31  | C30 | H30  | 119.7      |
| C29  | C30 | H30  | 119.7      |
| C30  | C31 | C32  | 117.8(2)   |
| C30  | C31 | H31  | 121.1      |
| C32  | C31 | H31  | 121.1      |
| C33  | C32 | C31  | 123.0(2)   |
| C33  | C32 | N2   | 118.7(2)   |
| C31  | C32 | N2   | 118.3(2)   |
| C34  | C33 | C32  | 118.4(2)   |
| C34  | C33 | H33  | 120.8      |
| C32  | C33 | H33  | 120.8      |

C33 C34 C29 119.9(2)  
 C33 C34 H34 120.0  
 C29 C34 H34 120.0  
 C19 C18 C17 112.9(3)  
 C19 C18 H18A 109.0  
 C17 C18 H18A 109.0  
 C19 C18 H18B 109.0  
 C17 C18 H18B 109.0  
 H18A C18 H18B 107.8  
 C20 C19 C18 112.0(3)  
 C20 C19 H19A 109.2  
 C18 C19 H19A 109.2  
 C20 C19 H19B 109.2  
 C18 C19 H19B 109.2  
 H19A C19 H19B 107.9  
 C25 C20 C21 118.1(4)  
 C25 C20 C19 120.3(4)  
 C21 C20 C19 121.6(4)  
 C20 C21 C22 120.9(5)  
 C20 C21 H21 119.6  
 C22 C21 H21 119.6  
 C23 C22 C21 119.7(6)  
 C23 C22 H22 120.1  
 C21 C22 H22 120.1  
 C24 C23 C22 120.1(5)  
 C24 C23 H23 120.0  
 C22 C23 H23 120.0  
 C23 C24 C25 120.2(6)  
 C23 C24 H24 119.9  
 C25 C24 H24 119.9  
 C20 C25 C24 120.9(5)  
 C20 C25 H25 119.5  
 C24 C25 H25 119.5  
 C19' C18' C17 106.2(7)  
 C19' C18' H18C 110.5  
 C17 C18' H18C 110.5  
 C19' C18' H18D 110.5  
 C17 C18' H18D 110.5  
 H18C C18' H18D 108.7  
 C20' C19' C18' 112.9(8)  
 C20' C19' H19C 109.0  
 C18' C19' H19C 109.0  
 C20' C19' H19D 109.0  
 C18' C19' H19D 109.0  
 H19C C19' H19D 107.8  
 C25' C20' C21' 118.6(9)  
 C25' C20' C19' 120.7(9)  
 C21' C20' C19' 120.6(9)  
 C20' C21' C22' 120.9(11)  
 C20' C21' H21' 119.6  
 C22' C21' H21' 119.6  
 C23' C22' C21' 119.0(12)  
 C23' C22' H22' 120.5  
 C21' C22' H22' 120.5  
 C24' C23' C22' 120.7(11)  
 C24' C23' H23' 119.7  
 C22' C23' H23' 119.7  
 C23' C24' C25' 119.9(13)  
 C23' C24' H24' 120.1  
 C25' C24' H24' 120.1  
 C20' C25' C24' 120.7(11)

C20' C25' H25' 119.7  
C24' C25' H25' 119.7

Torsion angles [°] for **Ac-7e**. *CCDC 2197380*

---

|      |     |     |      |             |
|------|-----|-----|------|-------------|
| O2   | N1  | C1  | C2   | -0.5(3)     |
| O1   | N1  | C1  | C2   | 179.3(2)    |
| O2   | N1  | C1  | C6   | -179.6(2)   |
| O1   | N1  | C1  | C6   | 0.2(3)      |
| C6   | C1  | C2  | C3   | 0.6(3)      |
| N1   | C1  | C2  | C3   | -178.5(2)   |
| C1   | C2  | C3  | C4   | 0.0(4)      |
| C2   | C3  | C4  | C5   | -0.7(4)     |
| C2   | C3  | C4  | C7   | -179.6(2)   |
| C3   | C4  | C5  | C6   | 0.9(3)      |
| C7   | C4  | C5  | C6   | 179.8(2)    |
| C4   | C5  | C6  | C1   | -0.3(3)     |
| C2   | C1  | C6  | C5   | -0.4(3)     |
| N1   | C1  | C6  | C5   | 178.7(2)    |
| C8   | O4  | C7  | O3   | -0.8(4)     |
| C8   | O4  | C7  | C4   | 178.87(19)  |
| C5   | C4  | C7  | O3   | -10.5(4)    |
| C3   | C4  | C7  | O3   | 168.4(2)    |
| C5   | C4  | C7  | O4   | 169.8(2)    |
| C3   | C4  | C7  | O4   | -11.3(3)    |
| C7   | O4  | C8  | C9   | -159.8(2)   |
| O4   | C8  | C9  | C10  | 58.7(3)     |
| O4   | C8  | C9  | C16  | -175.5(2)   |
| C8   | C9  | C10 | C15  | 65.6(3)     |
| C16  | C9  | C10 | C15  | -57.6(3)    |
| C8   | C9  | C10 | C11  | -109.8(3)   |
| C16  | C9  | C10 | C11  | 127.0(3)    |
| C15  | C10 | C11 | C12  | -1.3(4)     |
| C9   | C10 | C11 | C12  | 174.3(3)    |
| C10  | C11 | C12 | C13  | -0.8(5)     |
| C11  | C12 | C13 | C14  | 1.8(5)      |
| C12  | C13 | C14 | C15  | -0.8(5)     |
| C13  | C14 | C15 | C10  | -1.2(4)     |
| C11  | C10 | C15 | C14  | 2.3(4)      |
| C9   | C10 | C15 | C14  | -173.2(2)   |
| C10  | C9  | C16 | C17  | -57.1(3)    |
| C8   | C9  | C16 | C17  | 179.5(2)    |
| C9   | C16 | C17 | C26  | 177.9(2)    |
| C9   | C16 | C17 | C18  | -47.3(3)    |
| C9   | C16 | C17 | C18' | -78.2(4)    |
| C16  | C17 | C26 | C27  | -174.9(2)   |
| C18  | C17 | C26 | C27  | 49.8(3)     |
| C18' | C17 | C26 | C27  | 81.7(4)     |
| C28  | O5  | C27 | C26  | 169.3(2)    |
| C17  | C26 | C27 | O5   | 172.3(2)    |
| C27  | O5  | C28 | O6   | -0.2(4)     |
| C27  | O5  | C28 | C29  | -178.8(2)   |
| O6   | C28 | C29 | C30  | 0.3(3)      |
| O5   | C28 | C29 | C30  | 179.0(2)    |
| O6   | C28 | C29 | C34  | -178.1(2)   |
| O5   | C28 | C29 | C34  | 0.5(3)      |
| C34  | C29 | C30 | C31  | 0.6(3)      |
| C28  | C29 | C30 | C31  | -177.9(2)   |
| C29  | C30 | C31 | C32  | -0.6(3)     |
| C30  | C31 | C32 | C33  | 0.3(3)      |
| C30  | C31 | C32 | N2   | -178.66(19) |

|      |      |      |      |            |
|------|------|------|------|------------|
| O8   | N2   | C32  | C33  | 2.5(3)     |
| O7   | N2   | C32  | C33  | -176.2(2)  |
| O8   | N2   | C32  | C31  | -178.5(2)  |
| O7   | N2   | C32  | C31  | 2.8(3)     |
| C31  | C32  | C33  | C34  | 0.0(4)     |
| N2   | C32  | C33  | C34  | 178.9(2)   |
| C32  | C33  | C34  | C29  | 0.1(3)     |
| C30  | C29  | C34  | C33  | -0.4(3)    |
| C28  | C29  | C34  | C33  | 178.0(2)   |
| C16  | C17  | C18  | C19  | -62.6(3)   |
| C26  | C17  | C18  | C19  | 69.5(3)    |
| C17  | C18  | C19  | C20  | -176.2(3)  |
| C18  | C19  | C20  | C25  | 84.2(5)    |
| C18  | C19  | C20  | C21  | -94.2(5)   |
| C25  | C20  | C21  | C22  | 1.3(9)     |
| C19  | C20  | C21  | C22  | 179.7(7)   |
| C20  | C21  | C22  | C23  | 0.1(14)    |
| C21  | C22  | C23  | C24  | -2.0(14)   |
| C22  | C23  | C24  | C25  | 2.6(13)    |
| C21  | C20  | C25  | C24  | -0.7(9)    |
| C19  | C20  | C25  | C24  | -179.1(7)  |
| C23  | C24  | C25  | C20  | -1.2(12)   |
| C16  | C17  | C18' | C19' | 129.9(6)   |
| C26  | C17  | C18' | C19' | -118.0(6)  |
| C17  | C18' | C19' | C20' | 175.7(7)   |
| C18' | C19' | C20' | C25' | -92.9(14)  |
| C18' | C19' | C20' | C21' | 89.0(14)   |
| C25' | C20' | C21' | C22' | 1(3)       |
| C19' | C20' | C21' | C22' | 179(2)     |
| C20' | C21' | C22' | C23' | -3(4)      |
| C21' | C22' | C23' | C24' | 5(4)       |
| C22' | C23' | C24' | C25' | -6(4)      |
| C21' | C20' | C25' | C24' | -2(3)      |
| C19' | C20' | C25' | C24' | -179.8(19) |
| C23' | C24' | C25' | C20' | 4(4)       |

#### Symetry operations

---

1 'x, y, z'

## Supplementary References

1. Silvi, M., Verrier, C., Rey, Y. P., Buzzetti, L. & Melchiorre, P. Visible-light excitation of iminium ions enables the enantioselective catalytic  $\beta$ -alkylation of enals. *Nat. Chem.* **9**, 868–873 (2017).
2. Guo, C., Saifuddin, M., Saravanan, T., Sharifi, M. & Poelarends, G. J. Biocatalytic Asymmetric Michael Additions of Nitromethane to  $\alpha,\beta$ -Unsaturated Aldehydes via Enzyme-bound Iminium Ion Intermediates. *ACS Catal.* **9**, 4369–4373 (2019).
3. Bouisseau, A., Gao, M. & Willis, M. C. Traceless Rhodium-Catalyzed Hydroacylation Using Alkyl Aldehydes: The Enantioselective Synthesis of  $\beta$ -Aryl Ketones. *Chem. Eur. J.* **22**, 15624–15628 (2016).
4. Ren, W., Chang, W., Dai, J., Li, J. & Shi, Y. An Effective Pd-Catalyzed Regioselective Hydroformylation of Olefins with Formic Acid. *J. Am. Chem. Soc.* **138**, 14864–14867 (2016).
5. Uto, Y., Ogata, T., Harada, J., Kiyotsuka, Y., Ueno, Y., Miyazawa, Y., Kurata, H., Deguchi, T., Watanabe, N., Takagi, T., Wakimoto S., Okuyama, R., Abe, M., Kurikawa, N., Kawamura, S., Yamato, M. & Osumi, J. Novel and potent inhibitors of stearoyl-CoA desaturase-1. Part I: Discovery of 3-(2-hydroxyethoxy)-4-methoxy-N-[5-(3-trifluoromethylbenzyl)thiazol-2yl]benzamide. *Bioorganic Med. Chem. Lett.* **19**, 4151–4158 (2009).
6. Frost, C. G. & Hartley, B. C. Lewis Base-Promoted Hydrosilylation of Cyclic Malonates: Synthesis of  $\beta$ -Substituted Aldehydes and  $\gamma$ -Substituted Amines. *J. Org. Chem.* **74**, 3599–3602 (2009).
7. Liu, Y., Izzo, J. A., McLeod, D., Ričko, S., Svenningsen, E. B., Poulsen, T. B. & Jørgensen, K. A. Organocatalytic Asymmetric Multicomponent Cascade Reaction for the Synthesis of Contiguously Substituted Tetrahydronaphthols. *J. Am. Chem. Soc.* **143**, 8208–8220 (2021).
8. Singh, O. V., Han, H. Tandem Overman Rearrangement and Intramolecular Amidomercuration Reactions. Stereocontrolled Synthesis of cis- and trans-2,6-Dialkylpiperidines *Org. Lett.* **6**, 3067–3070 (2004).
9. Landa, A., Puente, Á., Santos, J. I., Vera, S., Oiarbide, M. & Palomo, C. Catalytic Conjugate Additions of Geminal Bis(sulfone)s: Expanding the Chemistry of Sulfones as Simple Alkyl Anion Equivalents. *Chem. Eur. J.* **15**, 11954–11962 (2009).
10. Amoroso, J. W., Borketey, L. S., Prasad, G. & Schnarr, N. A. Direct Acylation of Carrier Proteins with Functionalized  $\beta$ -Lactones. *Org. Lett.* **12**, 2330–2333 (2010).
11. Wappes, E. A., Nakafuku, K. M. & Nagib, D. A. Directed  $\beta$  C–H Amination of Alcohols via Radical Relay Chaperones. *J. Am. Chem. Soc.* **139**, 10204–10207 (2017).
12. Spallarossa, M., Wang, Q., Riva, R., & Zhu, J. Synthesis of Vinyl Isocyanides and Development of a Convertible Isonitrile. *Org. Lett.* **18**, 1622–1625 (2016).
13. Packard, G. K., Hu, Y., Vescovi, A. & Rychnovsky, S. D. Synthesis of Rimocidinolide Methyl Ester, the Aglycone of (+)-Rimocidin. *Angew. Chem. Int. Ed.* **43**, 2822–2826 (2004).
14. Shiomi, S., Sugahara, E. & Ishikawa, H. Efficient Organocatalytic Construction of C4-Alkyl Substituted Piperidines and Their Application to the Synthesis of (+)- $\alpha$ -Skytanthine. *Chem. Eur. J.* **21**, 14758–14763 (2015).
15. Bigi, M. A. & White, M. C. Terminal Olefins to Linear  $\alpha,\beta$ -Unsaturated Ketones: Pd(II)/Hypervalent Iodine Co-catalyzed Wacker Oxidation–Dehydrogenation. *J. Am. Chem. Soc.* **135**, 7831–7834 (2013).
16. Nishimura, T., Sawano, T. & Hayashi, T. Asymmetric Synthesis of  $\beta$ -Alkynyl Aldehydes by Rhodium-Catalyzed Conjugate Alkynylation. *Angew. Chem. Int. Ed.* **48**, 8057–8059 (2009).
17. Edelsztein, V. C., Di Chenna, P. H. & Gerardo, B. Synthesis of C-C bonded dimeric steroids by olefin metathesis. *Tetrahedron* **65**, 3615–3623 (2009).

18. Fox, R. J., Lalic, G. & Bergman, R. G. Regio- and Stereospecific Formation of Protected Allylic Alcohols via Zirconium-Mediated S<sub>N</sub>2' Substitution of Allylic Chlorides. *J. Am. Chem. Soc.* **129**, 14144–14145 (2007).
19. Gannett, P. M., Nagel, D. L., Reilly, P. J., Lawson, T., Sharpe, J. & Toth, B. Capsaicinoids: their separation, synthesis, and mutagenicity. *J. Org. Chem.* **53**, 1064–1071 (1988).
20. Egger, J., Bretscher, P., Freigang, S., Kopf, M. & Carreira, E. M. Discovery of a highly potent anti-inflammatory epoxyisoprostane-derived lactone. *J. Am. Chem. Soc.* **136**, 17382–17385 (2014).
21. Schmittl, M., Mahajan, A. A., Bucher, G. & Bats J. W. Thermal C2–C6 Cyclization of Enyne–Allenes. Experimental Evidence for a Stepwise Mechanism and for an Unusual Thermal Silyl Shift. *J. Org. Chem.* **72**, 2166–2173 (2007).
22. Li, Z., Huang, M., Zhang, X., Chen, J. & Huang, Y. N-Heterocyclic Carbene-Catalyzed Four-Component Reaction: Chemoselective C<sub>radical</sub>–C<sub>radical</sub> Relay Coupling Involving the Homoenolate Intermediate. *ACS Catal.* **11**, 10123–10130 (2021).
23. Dai, Z.-Y., Nong, Z.-S., Song, S. & Wang, P.-S. Photocatalytic C(sp<sup>3</sup>)–H Bond Addition to  $\alpha$ -Substituted Acrylates. *Org. Lett.* **23**, 3157–3161 (2021).
24. Kawashima, S., Aikawa, K. & Mikami, K. Rhodium-Catalyzed Hydrocarboxylation of Olefins with Carbon Dioxide. *Eur. J. Org. Chem.* **2016**, 3166–3170 (2016).
25. Buxton C. S., Blakemore D. C. & Bower J. F. Reductive Coupling of Acrylates with Ketones and Ketimines by a Nickel-Catalyzed Transfer-Hydrogenative Strategy. *Angew. Chem. Int. Ed.* **56**, 13824–13828 (2017).
26. Zhu, Q. & Nocera, D. G. Photocatalytic Hydromethylation and Hydroalkylation of Olefins Enabled by Titanium Dioxide Mediated Decarboxylation. *J. Am. Chem. Soc.* **142**, 17913–17918 (2020).
27. Yu, W., Yang, S., Xiong, F., Fan, T., Feng, Y., Huang Y., Fu J. & Wang T. Palladium-catalyzed carbonylation of benzylic ammonium salts to amides and esters via C–N bond activation. *Org. Biomol. Chem.* **16**, 3099–3103 (2018).
28. Monge, D., Martín-Zamora, E., Vázquez, J., Alcarazo, M., Álvarez, E., Fernández, R. & Lassaletta, J. M. Enantioselective Conjugate Addition of *N,N*-Dialkylhydrazones to  $\alpha$ -Hydroxy Enones. *Org. Lett.* **9**, 2867–2870 (2007).
29. Terrett, J. A., Clift, M. D. & MacMillan, D. W. C. Direct  $\beta$ -Alkylation of Aldehydes via Photoredox Organocatalysis. *J. Am. Chem. Soc.* **136**, 6858–6861 (2014).
30. Lakowicz, J. R. Ed. Principles of Fluorescence Spectroscopy, *Plenum Press*, 52–93. (1983)
31. Hatchard, C. G., Parker, C. A. A new sensitive chemical actinometer II. Potassium ferrioxalate as a standard chemical actinometer. *Proc. R. Soc. (London)*, **235**, 518–536 (1956).
32. Montalti, M., Credi, A., Prodi, L., Gandolfi, M.T. *Handbook of photochemistry*, Taylor & Francis, 601 (2006).
33. Holubov, C. A., Langford, C. H. Wavelength and Temperature Dependence in the Photolysis of the Chemical Actinometer, Potassium trisoxalatoferrate(III), at Longer Wavelengths. *Inorganica Chim. Acta* **53**, 59 (1981).
34. Flack, H. D. On enantiomorph-polarity estimation *Acta Cryst.* **A39**, 876–881 (1983).
35. Parsons, S. & Flack, H. D. Precise absolute-structure determination in light-atom crystals *Acta Cryst.* **A60**, 61–61 (2004).
36. Parsons, S., Flack, H. D. & Wagner, T. Use of intensity quotients and differences in absolute structure refinement *Acta Cryst.* **B69**, 249–259 (2013).
37. Escudero-Adán, E.C., Benet-Buchholz, J. & Ballester P. The use of Mo K $\alpha$  radiation in the assignment of the absolute configuration of light-atom molecules; the importance of high-resolution data *Acta Cryst.* **B70**, 660–668 (2014).
